# Supplementary material for: Mendelian randomization analyses implicate biogenesis of translation machinery in human aging
Source: PubMed Central journal article supplement (PMC8805714; doi:10.1101/gr.275636.121), 2022-02
Supplement: supp_gr.275636.121_Supplemental_Fig_S1_.pdf [file supp_gr.275636.121_Supplemental_Fig_S1_.pdf]

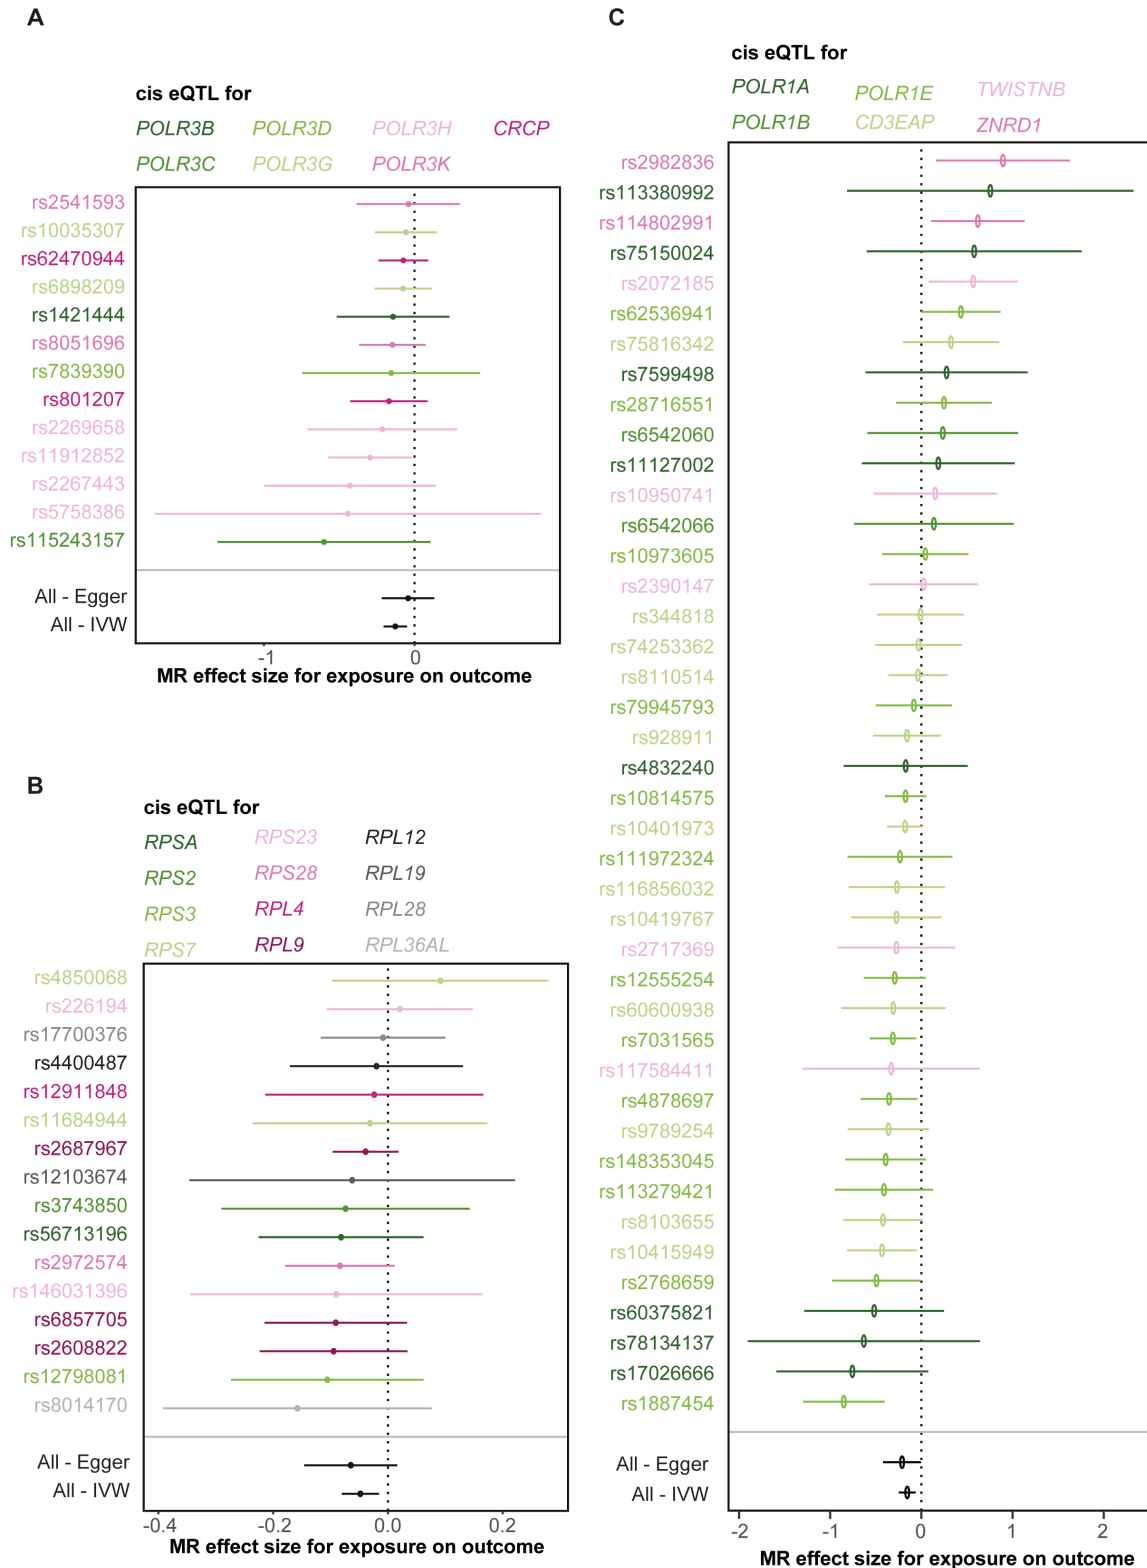

**Supplemental Figure 1 Forest Plots.**

Forest plots showing effect of exposure on outcome for individual cis-eQTL, where the gene associated with the cis-eQTL is colour-coded, for **A** Pol III subunit expression in visceral adipose and 90<sup>th</sup> percentile longevity, **B** RP gene expression in liver and 90<sup>th</sup> percentile longevity and **C** Pol I subunit expression in skeletal muscle and 99<sup>th</sup> percentile longevity, determined by MR.
