# Supplementary material for: Mendelian randomization analyses implicate biogenesis of translation machinery in human aging
Source: PubMed Central journal article supplement (PMC8805714; doi:10.1101/gr.275636.121), 2022-02
Supplement: supp_gr.275636.121_Supplemental_Fig_S2.pdf [file supp_gr.275636.121_Supplemental_Fig_S2.pdf]

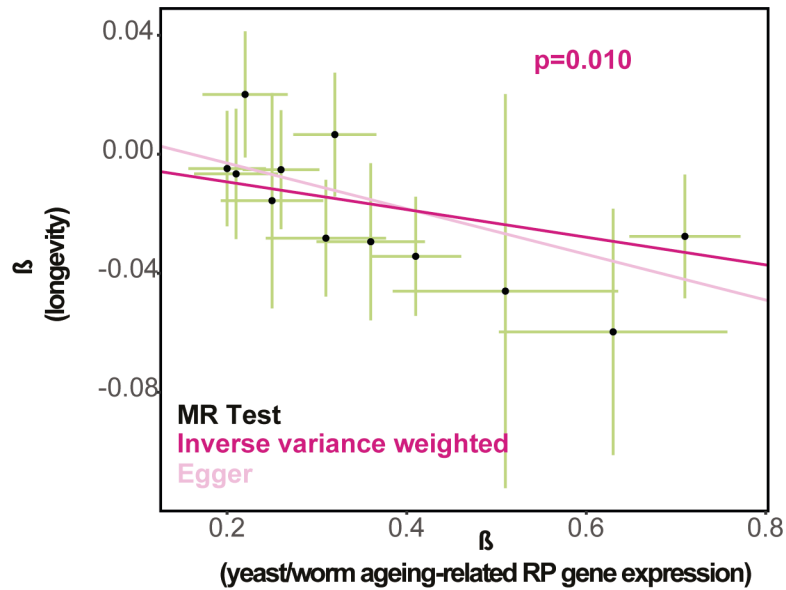

### Supplemental Figure 2 Mendelian Randomisation for a subset of RPs.

MR scatter plots of association between RP expression in liver, for RP genes whose orthologues were experimentally shown to have a role in ageing in yeast or worms, and longevity (90<sup>th</sup> percentile) showing results of two MR methods (IVW  $\beta=-0.046\pm 0.018$ ,  $p=0.010$ ). Each black point denotes a cis-eQTL; green bars show SEM. This subset includes 12 out of 16 cis-eQTLs shown in Figure 2C. Longevity  $\beta$  is the natural log of the odds ratio where lower values indicate lower chance of surviving beyond the 90<sup>th</sup> percentile. Expression  $\beta$  is reported as NES with larger values indicating higher expression and refers to expression of multiple genes.
