# Supplementary material for: Mendelian randomization analyses implicate biogenesis of translation machinery in human aging
Source: Genome Res. 2022 Feb;32(2):258–65. doi: 10.1101/gr.275636.121 (PMC8805714; doi:10.1101/gr.275636.121)
Supplement: Supplemental Material [file supp_gr.275636.121_Supplemental_Table_S1.xlsx]

## Sheet: Sheet1
Pol III	outcome: 90% longevity								Results of longevit MR for all complexes and all tissues.
exposure (tissue of expression)	method	nsnp	b	se	pval	qval	10% FRD		q value was calculated with qvalue package in R with conservtive parameters equivalent to Benjamini and Hochberg FDR (lambda = 0) accounting for 16 tests (8 tissues and 2 outcomes) for Pol III, RPs, Pol I or Pol II
Adipose Visceral	Inverse variance weighted	13	-0.127065	0.0398196	0.00141775	0.022684	Yes		10% FDR was determined with Benjamini and Hochberg procedure accounting for 16 tests (8 tissues and 2 outcomes) for Pol III, RPs, Pol I or Pol II
Pancreas	Inverse variance weighted	5	-0.0644316	0.0362591	0.075572	0.358429	No
Small Intestine	Inverse variance weighted	2	-0.105385	0.0752483	0.161363	0.358429	No
Colon Transverse	Inverse variance weighted	10	-0.0529928	0.0384968	0.168651	0.358429	No
Muscle Skeletal	Inverse variance weighted	24	-0.0372065	0.0274389	0.175108	0.358429	No
Brain Cortex	Inverse variance weighted	10	0.0365726	0.0288751	0.205306	0.364988	No
Liver	Inverse variance weighted	2	0.0275904	0.12868	0.830227	0.885576	No
Pituitary	Inverse variance weighted	5	-0.00311724	0.0337747	0.926464	0.926464	No
Pol III	outcome: 99% longevity
exposure (tissue of expression)	method	nsnp	b	se	pval	qval	10% FRD
Brain Cortex	Inverse variance weighted	10	0.0749954	0.0395994	0.0582444	0.358429	No
Adipose Visceral	Inverse variance weighted	11	-0.0495071	0.0695634	0.476662	0.678275	No
Pituitary	Inverse variance weighted	5	0.0750363	0.0529127	0.156157	0.358429	No
Small Intestine	Inverse variance weighted	2	-0.27698	0.206212	0.179215	0.358429	No
Colon Transverse	Inverse variance weighted	9	0.0411923	0.062332	0.508706	0.678275	No
Muscle Skeletal	Inverse variance weighted	23	0.0334246	0.0498941	0.502914	0.678275	No
Pancreas	Inverse variance weighted	5	-0.0403009	0.073777	0.584892	0.719867	No
Liver	Inverse variance weighted	2	-0.0758995	0.343697	0.825223	0.885576	No
RP	outcome: 90% longevity
exposure (tissue of expression)	method	nsnp	b	se	pval	qval	10% FRD
Liver	Inverse variance weighted	16	-0.0480587	0.016471	0.00352535	0.0564057	Yes
Pituitary	Inverse variance weighted	54	-0.0207205	0.0090697	0.0223373	0.178698	No
Colon Transverse	Inverse variance weighted	126	-0.01297	0.00972101	0.182129	0.467634	No
Small Intestine	Inverse variance weighted	36	-0.0182798	0.0144573	0.206087	0.467634	No
Brain Cortex	Inverse variance weighted	58	-0.0121812	0.0102313	0.233817	0.467634	No
Pancreas	Inverse variance weighted	86	-0.0072664	0.00860435	0.39839	0.637424	No
Adipose Visceral	Inverse variance weighted	189	-0.00668183	0.00907467	0.461538	0.671328	No
Muscle Skeletal	Inverse variance weighted	134	-0.0047367	0.0111235	0.670236	0.720319	No
RP	outcome: 99% longevity
exposure (tissue of expression)	method	nsnp	b	se	pval	qval	10% FRD
Liver	Inverse variance weighted	16	-0.0512912	0.0257996	0.0468048	0.249626	No
Small Intestine	Inverse variance weighted	36	-0.0349441	0.0207939	0.0928604	0.371441	No
Pancreas	Inverse variance weighted	84	-0.0169802	0.0137775	0.217779	0.467634	No
Brain Cortex	Inverse variance weighted	57	-0.0162158	0.0163115	0.320157	0.569168	No
Muscle Skeletal	Inverse variance weighted	134	-0.00861484	0.0172175	0.616825	0.720319	No
Colon Transverse	Inverse variance weighted	122	0.00683364	0.0148812	0.646081	0.720319	No
Pituitary	Inverse variance weighted	54	-0.00598024	0.0142765	0.675299	0.720319	No
Adipose Visceral	Inverse variance weighted	187	-0.00454823	0.0144174	0.752406	0.752406	No
Pol I	outcome: 90% longevity
exposure (tissue of expression)	method	nsnp	b	se	pval	qval	10% FRD
Brain Cortex	Inverse variance weighted	9	-0.0481576	0.0200694	0.0164148	0.0875457	No
Muscle Skeletal	Inverse variance weighted	45	-0.0498915	0.0288821	0.0840928	0.336371	No
Pancreas	Inverse variance weighted	19	-0.032648	0.0250018	0.191613	0.437972	No
Colon Transverse	Inverse variance weighted	19	0.0311262	0.0389628	0.424366	0.754428	No
Liver	Inverse variance weighted	5	-0.0343655	0.0650454	0.597269	0.869315	No
Adipose Visceral	Inverse variance weighted	21	-0.0192589	0.0492914	0.696008	0.869315	No
Small Intestine	Inverse variance weighted	8	0.00422716	0.0317494	0.894082	0.953687	No
Pituitary	Inverse variance weighted	16	-0.00123674	0.028257	0.96509	0.96509	No
Pol I	outcome: 99% longevity
exposure (tissue of expression)	method	nsnp	b	se	pval		10% FRD
Muscle Skeletal	Inverse variance weighted	42	-0.154777	0.0468919	0.000964379	0.0154301	Yes
Brain Cortex	Inverse variance weighted	8	-0.0801711	0.0322876	0.0130269	0.0875457	No
Pancreas	Inverse variance weighted	19	-0.0530886	0.0348064	0.127196	0.384471	No
Pituitary	Inverse variance weighted	17	0.0569719	0.0390108	0.144177	0.384471	No
Colon Transverse	Inverse variance weighted	19	0.0622723	0.0593359	0.293953	0.587907	No
Small Intestine	Inverse variance weighted	8	-0.0197056	0.0414082	0.634155	0.869315	No
Liver	Inverse variance weighted	5	0.0232134	0.0616058	0.706318	0.869315	No
Adipose Visceral	Inverse variance weighted	21	0.0215624	0.0766648	0.778514	0.88973	No
Pol II	outcome: 90% longevity
exposure (tissue of expression)	method	nsnp	b	se	pval	qval	10% FRD
Adipose Visceral	Inverse variance weighted	6	-0.200725	0.0968884	0.0382926	0.612681	No
Muscle Skeletal	Inverse variance weighted	27	0.0499549	0.0420932	0.235319	0.981314	No
Liver	Inverse variance weighted	2	-0.0383969	0.0561962	0.49444	0.981314	No
Pituitary	Inverse variance weighted	5	0.019137	0.0448221	0.669413	0.981314	No
Colon Transverse	Inverse variance weighted	7	-0.0173526	0.0649754	0.78942	0.981314	No
Pancreas	Inverse variance weighted	4	0.00696158	0.0398589	0.86135	0.981314	No
Brain Cortex	Inverse variance weighted	9	-0.00455119	0.0280757	0.871224	0.981314	No
Small Intestine	Inverse variance weighted	2	-0.00120736	0.0515498	0.981314	0.981314	No
Pol II	outcome: 99% longevity
exposure (tissue of expression)	method	nsnp	b	se	pval	qval	10% FRD
Liver	Inverse variance weighted	2	-0.100778	0.0897012	0.261233	0.981314	No
Adipose visceral	Inverse variance weighted	6	-0.135078	0.151311	0.37201	0.981314	No
Muscle Skeletal	Inverse variance weighted	27	0.0494122	0.0682805	0.469271	0.981314	No
Brain cortex	Inverse variance weighted	9	0.0163833	0.0446673	0.71378	0.981314	No
Small intestine	Inverse variance weighted	2	0.0305899	0.0950384	0.747552	0.981314	No
Pituitary	Inverse variance weighted	5	0.0245145	0.0765767	0.74887	0.981314	No
Colon Transverse	Inverse variance weighted	7	0.021236	0.0947215	0.822606	0.981314	No
Pancreas	Inverse variance weighted	4	0.00246693	0.0624398	0.968485	0.981314	No
