# Supplementary material for: Mendelian randomization analyses implicate biogenesis of translation machinery in human aging
Source: Genome Res. 2022 Feb;32(2):258–65. doi: 10.1101/gr.275636.121 (PMC8805714; doi:10.1101/gr.275636.121)
Supplement: Supplemental Material [file supp_gr.275636.121_Supplemental_Table_S2.xlsx]

## Sheet: Sheet1
Pol III		adipose visceral						Results of MR looking at Disease/Developmental and anthropometric outcomes for exposures that were significantly associated with longevity.
outcome	n	ß	se	p	q	10% FDR		q value was calculated with qvalue package in R with conservtive parameters equivalent to Benjamini and Hochberg FDR (lambda = 0) accounting for 16 tests (8 tissues and 2 outcomes) for Pol III, RPs, Pol I or Pol II
Disease								10% FDR was determined with Benjamini and Hochberg procedure accounting for 10 tests (the noted outcomes) for Pol III, RPs or Pol I
Alzheimer's disease (id:297)	10	0.053	0.043	0.22	0.44	No
Amyotrophic lateral sclerosis (id:1085)	11	0.00046	0.0069	0.95	0.95	No
Breast cancer (id:1126)	13	-0.02	0.019	0.28	0.466667	No
Coronary heart disease (id:7)	13	-0.037	0.019	0.049	0.245	No
Heart attack, self-reported (id:UKB-b:15829)	14	-0.00065	0.00074	0.38	0.542857	No
Ischemic stroke (id:1108)	9	0.008	0.053	0.89	0.95	No
Lung cancer (id:966)	13	0.021	0.036	0.56	0.7	No
Osteoarthritis, self-reported (id:UKB-b:14486)	14	0.0018	0.0013	0.17	0.425	No
Ovarian cancer (id:1120)	13	0.062	0.027	0.023	0.23	No
Type 2 diabetes (id:23)	9	-0.054	0.038	0.14	0.425	No
Developmental and anthropometric
Age when periods started (menarche) (id:UKB-b:3768)	14	0.0077	0.0062	0.21	0.525	No
Birth weight (id:UKB-a:198)	14	-0.0022	0.0074	0.77	0.855556	No
Body fat percentage (id:UKB-b:8909)	14	-0.011	0.0048	0.02	0.1	No
Childhood obesity (id:1096)	9	0.088	0.065	0.17	0.525	No
Difference in height between adolescence and adulthood (id:1040)	9	0.025	0.048	0.6	0.855556	No
Difference in height between childhood and adulthood (id:1037)	9	-0.025	0.03	0.41	0.82	No
Height (id:89)	9	-0.0039	0.0074	0.59	0.855556	No
Obesity class 1 (id:90)	9	-0.012	0.034	0.72	0.855556	No
Whole body fat mass (id:UKB-b:19393)	14	-0.013	0.0055	0.019	0.1	No
Whole body fat-free mass (id:UKB-b:13354)	14	0.00033	0.0053	0.95	0.95	No
Smoking
Current tobacco smoking (ukb-b-223)	14	-0.0017	0.0028	0.56
RP			liver
outcome	n	ß	se	p	q	10% FDR
Disease
Alzheimer's disease (id:297)	15	0.019	0.015	0.18	0.625	No
Amyotrophic lateral sclerosis (id:1086)	18	0.0043	0.0035	0.21	0.625	No
Breast cancer (id:1126)	20	0.0063	0.0093	0.5	0.883333	No
Coronary heart disease (id:7)	17	0.012	0.0086	0.16	0.625	No
Heart attack, self-reported (id:UKB-b:15829)	18	0.00029	0.00025	0.25	0.625	No
Ischemic stroke (id:1108)	14	-0.0059	0.014	0.68	0.944444	No
Lung cancer (id:966)	18	-0.00024	0.018	0.99	0.99	No
Osteoarthritis, self-reported (id:UKB-b:14486)	18	-0.00015	0.00046	0.76	0.944444	No
Ovarian cancer (id:1120)	22	0.0023	0.012	0.85	0.944444	No
Type 2 diabetes (id:23)	15	0.0079	0.013	0.53	0.883333	No
Developmental and anthropometric
Age when periods started (menarche) (id:UKB-b:3768)	21	-0.002	0.0021	0.33	0.68	No
Birth weight (id:UKB-a:198)	20	-0.0018	0.0032	0.58	0.811111	No
Body fat percentage (id:UKB-b:8909)	21	0.00044	0.002	0.83	0.83	No
Childhood obesity (id:1096)	12	-0.039	0.024	0.11	0.566667	No
Difference in height between adolescence and adulthood (id:ieu-a-1040)	12	0.026	0.027	0.34	0.68	No
Difference in height between childhood and adulthood (id:ieu-a-1037)	12	0.017	0.013	0.17	0.566667	No
Height (id:89)	15	-0.0041	0.0057	0.47	0.783333	No
Obesity class 1 (id:90)	14	0.016	0.011	0.16	0.566667	No
Whole body fat mass (id:UKB-b:19393)	19	-0.0008	0.0021	0.7	0.811111	No
Whole body fat-free mass (id:UKB-b:13354)	21	-0.00087	0.0025	0.73	0.811111	No
Smoking
Current tobacco smoking (ukb-b-223)	21	8.4e-05	0.0013	0.95
Pol I			muscle
outcome	n	ß	se	p	q	10% FDR
Disease
Alzheimer's disease (id:297)	38	0.058	0.023	0.011	0.0366667	Yes
Amyotrophic lateral sclerosis (id:1086)	47	-0.013	0.0041	0.0011	0.011	Yes
Breast cancer (id:1126)	67	0.011	0.0077	0.15	0.25	No
Coronary heart disease (id:7)	50	-0.03	0.011	0.0048	0.024	Yes
Heart attack, self-reported (id:UKB-b:15829)	48	7.4e-05	0.00032	0.82	0.83	No
Ischemic stroke (id:1108)	28	-0.039	0.026	0.14	0.25	No
Lung cancer (id:966)	52	-0.026	0.02	0.19	0.271429	No
Osteoarthritis, self-reported (id:UKB-b:14486)	61	-0.00096	0.00054	0.076	0.19	No
Ovarian cancer (id:1120)	67	0.013	0.013	0.34	0.425	No
Type 2 diabetes (id:23)	13	0.0066	0.031	0.83	0.83	No
Developmental and anthropometric
Age when periods started (menarche) (id:UKB-b:3768)	64	0.0015	0.0026	0.55	0.785714	No
Birth weight (id:UKB-a:198)	64	0.0035	0.0033	0.28	0.7	No
Body fat percentage (id:UKB-b:8909)	64	-0.0053	0.0025	0.035	0.175	No
Childhood obesity (id:1096)	12	-0.0075	0.066	0.91	0.91	No
Difference in height between adolescence and adulthood (id:ieu-a-1040)	12	-0.012	0.055	0.82	0.91	No
Difference in height between childhood and adulthood (id:ieu-a-1037)	12	0.024	0.034	0.48	0.785714	No
Height (id:89)	29	0.0065	0.0081	0.42	0.785714	No
Obesity class 1 (id:90)	27	0.0036	0.023	0.88	0.91	No
Whole body fat mass (id:UKB-b:19393)	64	-0.0074	0.0032	0.019	0.175	No
Whole body fat-free mass (id:UKB-b:13354)	64	-0.0034	0.0019	0.078	0.26	No
Smoking
Current tobacco smoking (ukb-b-223)	64	-0.0016	0.0014	0.23
