# Supplementary material for: Mendelian randomization analyses implicate biogenesis of translation machinery in human aging
Source: Genome Res. 2022 Feb;32(2):258–65. doi: 10.1101/gr.275636.121 (PMC8805714; doi:10.1101/gr.275636.121)
Supplement: Supplemental Material [file supp_gr.275636.121_Supplemental_Table_S3.xlsx]

## Sheet: Sheet1
Pol III specific subunit genes			Pol II specific subunit genes			Pol I specific subunit genes			RP genes				Lists of genes used for MR
Symbol	Ensembl gene ID		Symbol	Ensembl gene ID		Symbol	Ensembl gene ID		Symbol	Ensembl gene ID
POLR3A	ENSG00000148606		POLR2A	ENSG00000181222		POLR1A	ENSG00000068654		FAU	ENSG00000149806
POLR3B	ENSG00000013503		POLR2B	ENSG00000047315		POLR1B	ENSG00000125630		RACK1	ENSG00000204628
POLR3C	ENSG00000186141		POLR2C	ENSG00000102978		POLR1E	ENSG00000137054		RPL10	ENSG00000147403
POLR3D	ENSG00000168495		POLR2J	ENSG00000005075		POLR1F	ENSG00000105849		RPL10A	ENSG00000198755
POLR3E	ENSG00000058600		POLR21	ENSG00000105258		POLR1G	ENSG00000117877		RPL10L	ENSG00000165496
POLR3F	ENSG00000132664		POLR2D	ENSG00000144231		POLR1H	ENSG00000066379		RPL11	ENSG00000142676
POLR3G	ENSG00000113356		POLR2G	ENSG00000168002					RPL12	ENSG00000197958
POLR3GL	ENSG00000121851		POLR2L	ENSG00000177700					RPL13	ENSG00000167526
POLR3H	ENSG00000100413		POLR2K	ENSG00000147669					RPL13A	ENSG00000142541
POLR3K	ENSG00000161980								RPL14	ENSG00000188846
CRCP	ENSG00000241258								RPL15	ENSG00000174748
									RPL17	ENSG00000265681
									RPL18	ENSG00000063177
									RPL18A	ENSG00000105640
									RPL19	ENSG00000108298
									RPL21	ENSG00000122026
									RPL22	ENSG00000116251
									RPL22L1	ENSG00000163584
									RPL23	ENSG00000125691
									RPL23A	ENSG00000198242
									RPL24	ENSG00000114391
									RPL26	ENSG00000161970
									RPL26L1	ENSG00000037241
									RPL27	ENSG00000131469
									RPL27A	ENSG00000166441
									RPL28	ENSG00000108107
									RPL29	ENSG00000162244
									RPL3	ENSG00000100316
									RPL30	ENSG00000156482
									RPL31	ENSG00000071082
									RPL32	ENSG00000144713
									RPL34	ENSG00000109475
									RPL35	ENSG00000136942
									RPL35A	ENSG00000182899
									RPL36	ENSG00000130255
									RPL36A	ENSG00000241343
									RPL36AL	ENSG00000165502
									RPL37	ENSG00000145592
									RPL37A	ENSG00000197756
									RPL38	ENSG00000172809
									RPL39	ENSG00000198918
									RPL39L	ENSG00000163923
									RPL3L	ENSG00000140986
									RPL4	ENSG00000174444
									RPL41	ENSG00000229117
									RPL5	ENSG00000122406
									RPL6	ENSG00000089009
									RPL7	ENSG00000147604
									RPL7A	ENSG00000148303
									RPL7L1	ENSG00000146223
									RPL8	ENSG00000161016
									RPL9	ENSG00000163682
									RPLP0	ENSG00000089157
									RPLP1	ENSG00000137818
									RPLP2	ENSG00000177600
									RPS10	ENSG00000124614
									RPS11	ENSG00000142534
									RPS12	ENSG00000112306
									RPS13	ENSG00000110700
									RPS14	ENSG00000164587
									RPS15	ENSG00000115268
									RPS15A	ENSG00000134419
									RPS16	ENSG00000105193
									RPS17	ENSG00000182774
									RPS18	ENSG00000231500
									RPS19	ENSG00000105372
									RPS2	ENSG00000140988
									RPS20	ENSG00000008988
									RPS21	ENSG00000171858
									RPS23	ENSG00000186468
									RPS24	ENSG00000138326
									RPS25	ENSG00000118181
									RPS26	ENSG00000197728
									RPS27	ENSG00000177954
									RPS27A	ENSG00000143947
									RPS27L	ENSG00000185088
									RPS28	ENSG00000233927
									RPS29	ENSG00000213741
									RPS3	ENSG00000149273
									RPS3A	ENSG00000145425
									RPS4X	ENSG00000198034
									RPS4Y1	ENSG00000129824
									RPS4Y2	ENSG00000280969
									RPS5	ENSG00000083845
									RPS6	ENSG00000137154
									RPS7	ENSG00000171863
									RPS8	ENSG00000142937
									RPS9	ENSG00000170889
									RPSA	ENSG00000168028
									UBA52	ENSG00000221983
