# Supplementary material for: Mendelian randomization analyses implicate biogenesis of translation machinery in human aging
Source: Genome Res. 2022 Feb;32(2):258–65. doi: 10.1101/gr.275636.121 (PMC8805714; doi:10.1101/gr.275636.121)
Supplement: Supplemental Material [file supp_gr.275636.121_Supplemental_Table_S4.xlsx]

## Sheet: Legend
This document contains all the cis-eQTLs that were used in MR analyses as lists .
Data for each complex (Pol I, II, III -specific subunits and ribosomal proteins) are given in separate tabs for clarity. Within each tab, the data are separated by exposure (tissue expression). Additionally, subsets of RP gene cis-eQTLs are indicated.

## Sheet: Pol III
Adipose Visceral
Gencode	Gene	Variant.Id	SNP	PVal	beta	Tissue	other_allele	effect_allele	se	eaf	LDthreshold
ENSG00000241258.6	CRCP	chr7_66002468_G_A_b38	rs62470944	2.2e-08	0.56	Adipose - Visceral (Omentum)	G	A	0.100081	0.039757	0.1
ENSG00000241258.6	CRCP	chr7_66555603_T_C_b38	rs801207	9.4e-05	0.15	Adipose - Visceral (Omentum)	T	C	0.0384066	0.46538	0.1
ENSG00000013503.9	POLR3B	chr12_105893542_T_C_b38	rs1421444	1.5e-05	0.1	Adipose - Visceral (Omentum)	T	C	0.0231017	0.487309	0.1
ENSG00000168495.12	POLR3D	chr8_22121065_A_G_b38	rs58080661	2e-05	0.2	Adipose - Visceral (Omentum)	A	G	0.0468945	0.102686	0.1
ENSG00000168495.12	POLR3D	chr8_22409300_C_T_b38	rs7839390	5.6e-05	-0.16	Adipose - Visceral (Omentum)	C	T	0.0397115	0.070972	0.1
ENSG00000186141.8	POLR3C	chr1_145726503_T_C_b38	rs115243157	1.6e-05	0.36	Adipose - Visceral (Omentum)	T	C	0.0834405	0.011178	0.1
ENSG00000113356.11	POLR3G	chr5_90648697_T_C_b38	rs6898209	4.2e-06	-0.21	Adipose - Visceral (Omentum)	T	C	0.04564	0.288134	0.1
ENSG00000113356.11	POLR3G	chr5_90906182_C_T_b38	rs10035307	8.4e-06	-0.19	Adipose - Visceral (Omentum)	C	T	0.0426513	0.485531	0.1
ENSG00000161980.5	POLR3K	chr16_50956_G_C_b38	rs8051696	2.4e-17	0.27	Adipose - Visceral (Omentum)	G	C	0.0318675	0.187803	0.1
ENSG00000161980.5	POLR3K	chr16_53423_C_A_b38	rs2541593	4.8e-06	0.15	Adipose - Visceral (Omentum)	C	A	0.0327988	0.213097	0.1
ENSG00000100413.16	POLR3H	chr22_41473264_G_T_b38	rs11912852	1.4e-14	0.15	Adipose - Visceral (Omentum)	G	T	0.0194897	0.244813	0.1
ENSG00000100413.16	POLR3H	chr22_41884614_T_C_b38	rs2269658	1.4e-06	-0.11	Adipose - Visceral (Omentum)	T	C	0.0227979	0.232846	0.1
ENSG00000100413.16	POLR3H	chr22_41542822_G_A_b38	rs5758386	3e-05	-0.18	Adipose - Visceral (Omentum)	G	A	0.0431296	0.178868	0.1
ENSG00000100413.16	POLR3H	chr22_41891450_A_G_b38	rs2267443	0.00011	-0.072	Adipose - Visceral (Omentum)	A	G	0.0186171	0.345544	0.1
Colon Transverse
Gencode	Gene	Variant.Id	SNP	PVal	beta	Tissue	other_allele	effect_allele	se	eaf	LDthreshold
ENSG00000161980.5	POLR3K	chr16_49353_A_G_b38	rs77046488	9.1e-20	0.33	Colon - Transverse	A	G	0.0362669	0.189639	0.1
ENSG00000161980.5	POLR3K	chr16_140969_A_G_b38	rs2541604	3.9e-05	0.14	Colon - Transverse	A	G	0.0340357	0.360393	0.1
ENSG00000161980.5	POLR3K	chr16_181487_C_G_b38	rs143741293	7.5e-05	0.51	Colon - Transverse	C	G	0.128793	0.013003	0.1
ENSG00000161980.5	POLR3K	chr16_122017_C_T_b38	rs13336074	7.8e-05	0.3	Colon - Transverse	C	T	0.0759405	0.070432	0.1
ENSG00000241258.6	CRCP	chr7_66497940_G_A_b38	rs12534263	6.3e-08	0.63	Colon - Transverse	G	A	0.11645	0.041579	0.1
ENSG00000241258.6	CRCP	chr7_66992348_T_C_b38	rs6957031	6.5e-05	-0.19	Colon - Transverse	T	C	0.0475728	0.217753	0.1
ENSG00000100413.16	POLR3H	chr22_41391946_G_T_b38	rs5758324	4.6e-07	-0.14	Colon - Transverse	G	T	0.0277652	0.382178	0.1
ENSG00000100413.16	POLR3H	chr22_41322090_C_T_b38	rs13053356	2.8e-05	0.11	Colon - Transverse	C	T	0.0262583	0.18593	0.1
ENSG00000186141.8	POLR3C	chr1_145943692_T_C_b38	rs16826959	2.7e-05	0.82	Colon - Transverse	T	C	0.195359	0.02914	0.1
ENSG00000113356.11	POLR3G	chr5_90493637_A_G_b38	rs72781084	4.8e-10	0.33	Colon - Transverse	A	G	0.0530077	0.17998	0.1
ENSG00000113356.11	POLR3G	chr5_90667430_C_T_b38	rs10942602	6.8e-05	-0.19	Colon - Transverse	C	T	0.0477006	0.283593	0.1
ENSG00000121851.12	POLR3GL	chr1_145801891_G_A_b38	rs10797655	5e-05	-0.11	Colon - Transverse	G	A	0.0271228	0.423522	0.1
Pancreas
Gencode	Gene	Variant.Id	SNP	PVal	beta	Tissue	other_allele	effect_allele	se	eaf	LDthreshold
ENSG00000161980.5	POLR3K	chr16_41309_C_T_b38	rs1088640	4.7e-06	0.25	Pancreas	C	T	0.054612	0.449467	0.1
ENSG00000241258.6	CRCP	chr7_65594158_A_G_b38	rs62472293	5.6e-07	0.45	Pancreas	A	G	0.0899186	0.101983	0.1
ENSG00000241258.6	CRCP	chr7_65435048_T_C_b38	rs28565886	7.3e-06	0.21	Pancreas	T	C	0.0468254	0.315318	0.1
ENSG00000100413.16	POLR3H	chr22_41734839_G_A_b38	rs13055891	1.6e-05	0.25	Pancreas	G	A	0.0579448	0.291104	0.1
ENSG00000058600.15	POLR3E	chr16_21822349_G_A_b38	rs144790598	3.2e-08	-0.74	Pancreas	G	A	0.133812	0.009579	0.1
ENSG00000058600.15	POLR3E	chr16_22354845_G_C_b38	rs116898881	4.9e-06	-0.48	Pancreas	G	C	0.105055	0.008726	0.1
ENSG00000186141.8	POLR3C	chr1_145249926_G_C_b38	rs149609749	4.1e-05	0.61	Pancreas	G	C	0.148716	0.02271	0.1
ENSG00000132664.11	POLR3F	chr20_17842190_T_C_b38	rs6111696	4.1e-05	-0.94	Pancreas	T	C	0.229169	0.045921	0.1
ENSG00000113356.11	POLR3G	chr5_90511894_G_A_b38	rs6897910	2.2e-05	0.3	Pancreas	G	A	0.0706953	0.378948	0.1
Pituitary
Gencode	Gene	Variant.Id	SNP	PVal	beta	Tissue	other_allele	effect_allele	se	eaf	LDthreshold
ENSG00000241258.6	CRCP	chr7_66360270_T_G_b38	rs3757417	1.3e-08	-0.61	Pituitary	T	G	0.10728	0.094794	0.1
ENSG00000241258.6	CRCP	chr7_66087510_A_G_b38	rs313829	1.4e-05	-0.32	Pituitary	A	G	0.0736672	0.300301	0.1
ENSG00000241258.6	CRCP	chr7_65263335_C_A_b38	rs144836114	1.6e-05	0.78	Pituitary	C	A	0.180788	0.011382	0.1
ENSG00000100413.16	POLR3H	chr22_41201224_G_A_b38	rs28457031	1.1e-05	-0.62	Pituitary	G	A	0.141021	0.026134	0.1
ENSG00000100413.16	POLR3H	chr22_41843344_G_C_b38	rs1009544	3.3e-05	-0.26	Pituitary	G	C	0.0626248	0.117758	0.1
ENSG00000113356.11	POLR3G	chr5_90567542_T_C_b38	rs139849318	3.5e-06	-1.6	Pituitary	T	C	0.344898	0.006826	0.1
Small intestine
Gencode	Gene	Variant.Id	SNP	PVal	beta	Tissue	other_allele	effect_allele	se	eaf	LDthreshold
ENSG00000113356.11	POLR3G	chr5_90571055_C_G_b38	rs154572	8.5e-07	0.31	Small Intestine - Terminal Ileum	C	G	0.062963	0.464457	0.1
ENSG00000100413.16	POLR3H	chr22_42499669_G_A_b38	rs5758762	5.8e-05	-0.34	Small Intestine - Terminal Ileum	G	A	0.0845602	0.183111	0.1
ENSG00000241258.6	CRCP	chr7_65751069_A_G_b38	rs113492601	2.5e-05	-0.91	Small Intestine - Terminal Ileum	A	G	0.215906	0.018911	0.1
Brain-cortex
Gencode	Gene	Variant.Id	SNP	PVal	beta	Tissue	other_allele	effect_allele	se	eaf	LDthreshold
ENSG00000161980.5	POLR3K	chr16_33887_C_A_b38	rs2562131	6.5e-07	-0.23	Brain - Cortex	C	A	0.0462243	0.261964	0.1
ENSG00000241258.6	CRCP	chr7_65263335_C_A_b38	rs144836114	3e-07	0.9	Brain - Cortex	C	A	0.175663	0.011382	0.1
ENSG00000241258.6	CRCP	chr7_66124952_C_T_b38	rs13242721	3.8e-06	0.29	Brain - Cortex	C	T	0.062743	0.39397	0.1
ENSG00000100413.16	POLR3H	chr22_41506499_T_C_b38	rs137830	2.6e-15	0.55	Brain - Cortex	T	C	0.0695433	0.175265	0.1
ENSG00000100413.16	POLR3H	chr22_41610834_T_C_b38	rs132762	4.7e-09	-0.31	Brain - Cortex	T	C	0.052924	0.2546	0.1
ENSG00000100413.16	POLR3H	chr22_41132523_G_A_b38	rs9607777	4.6e-05	0.56	Brain - Cortex	G	A	0.137421	0.025912	0.1
ENSG00000100413.16	POLR3H	chr22_42140913_C_T_b38	rs142567567	0.00011	0.45	Brain - Cortex	C	T	0.116357	0.036957	0.1
ENSG00000100413.16	POLR3H	chr22_40990080_C_G_b38	rs9623300	0.00013	-0.34	Brain - Cortex	C	G	0.088855	0.140803	0.1
ENSG00000058600.15	POLR3E	chr16_22314460_C_T_b38	rs2926355	3.2e-06	-1.3	Brain - Cortex	C	T	0.279117	0.05058	0.1
ENSG00000113356.11	POLR3G	chr5_90462999_T_A_b38	rs10043702	1.3e-05	0.29	Brain - Cortex	T	A	0.0665122	0.307074	0.1
ENSG00000113356.11	POLR3G	chr5_90922689_T_G_b38	rs3114654	3.7e-05	0.26	Brain - Cortex	T	G	0.0630233	0.428115	0.1
Liver
Gencode	Gene	Variant.Id	SNP	PVal	beta	Tissue	other_allele	effect_allele	se	eaf	LDthreshold
ENSG00000241258.6	CRCP	chr7_65621328_C_T_b38	rs143629591	9.6e-05	-0.55	Liver	C	T	0.141008	0.071603	0.1
ENSG00000186141.8	POLR3C	chr1_145747557_C_T_b38	rs2624756	1.7e-06	0.23	Liver	C	T	0.0480552	0.312185	0.1
Muscle-skeletal
Gencode	Gene	Variant.Id	SNP	PVal	beta	Tissue	other_allele	effect_allele	se	eaf	LDthreshold
ENSG00000161980.5	POLR3K	chr16_53923_C_G_b38	rs2562145	8.1e-18	-0.18	Muscle - Skeletal	C	G	0.0209347	0.41389	0.1
ENSG00000161980.5	POLR3K	chr16_42391_G_A_b38	rs1088642	9.1e-06	0.16	Muscle - Skeletal	G	A	0.0360562	0.157873	0.1
ENSG00000161980.5	POLR3K	chr16_65819_C_T_b38	rs11646266	6.5e-05	-0.089	Muscle - Skeletal	C	T	0.0222841	0.355456	0.1
ENSG00000148606.12	POLR3A	chr10_77952445_C_T_b38	rs150418982	6e-05	-0.39	Muscle - Skeletal	C	T	0.0971887	0.035635	0.1
ENSG00000148606.12	POLR3A	chr10_77970638_C_T_b38	rs76192836	6.9e-05	-0.33	Muscle - Skeletal	C	T	0.0829207	0.035163	0.1
ENSG00000148606.12	POLR3A	chr10_78355337_G_A_b38	rs113080446	8.8e-05	0.37	Muscle - Skeletal	G	A	0.0943517	0.017897	0.1
ENSG00000148606.12	POLR3A	chr10_78953737_G_T_b38	rs74431482	0.00012	-0.33	Muscle - Skeletal	G	T	0.0858006	0.014339	0.1
ENSG00000013503.9	POLR3B	chr12_106358027_G_A_b38	rs61943670	6.9e-12	0.23	Muscle - Skeletal	G	A	0.0335291	0.240299	0.1
ENSG00000013503.9	POLR3B	chr12_106516568_C_T_b38	rs11616127	1.4e-05	-0.14	Muscle - Skeletal	C	T	0.0322294	0.263864	0.1
ENSG00000241258.6	CRCP	chr7_66158801_G_A_b38	rs28376899	3.8e-24	-0.6	Muscle - Skeletal	G	A	0.0591913	0.09489	0.1
ENSG00000241258.6	CRCP	chr7_66671294_C_T_b38	rs7782418	8.2e-09	0.46	Muscle - Skeletal	C	T	0.0798016	0.055017	0.1
ENSG00000241258.6	CRCP	chr7_66564154_G_C_b38	rs78565104	4.6e-06	-0.27	Muscle - Skeletal	G	C	0.058923	0.1426	0.1
ENSG00000241258.6	CRCP	chr7_66601386_T_C_b38	rs10950045	4.9e-06	0.17	Muscle - Skeletal	T	C	0.0372071	0.466276	0.1
ENSG00000241258.6	CRCP	chr7_66338914_C_T_b38	rs73146660	5.1e-05	-0.68	Muscle - Skeletal	C	T	0.16786	0.008974	0.1
ENSG00000241258.6	CRCP	chr7_67108821_A_G_b38	rs191337621	0.00013	-0.55	Muscle - Skeletal	A	G	0.143736	0.013882	0.1
ENSG00000241258.6	CRCP	chr7_67047403_A_G_b38	rs11526166	0.00015	-0.15	Muscle - Skeletal	A	G	0.0395667	0.322012	0.1
ENSG00000241258.6	CRCP	chr7_65778030_C_A_b38	rs145104488	0.00025	-0.53	Muscle - Skeletal	C	A	0.144719	0.012581	0.1
ENSG00000241258.6	CRCP	chr7_65199604_T_C_b38	rs150449970	0.0003	0.62	Muscle - Skeletal	T	C	0.171493	0.013176	0.1
ENSG00000241258.6	CRCP	chr7_65775694_G_C_b38	rs181598297	0.00031	0.62	Muscle - Skeletal	G	C	0.171898	0.005591	0.1
ENSG00000241258.6	CRCP	chr7_66986751_G_T_b38	rs4718436	0.00034	0.17	Muscle - Skeletal	G	T	0.0474496	0.222389	0.1
ENSG00000241258.6	CRCP	chr7_65867315_T_C_b38	rs190954637	0.00034	-0.65	Muscle - Skeletal	T	C	0.181425	0.005591	0.1
ENSG00000100413.16	POLR3H	chr22_41473264_G_T_b38	rs11912852	5.1e-20	0.3	Muscle - Skeletal	G	T	0.0327444	0.244813	0.1
ENSG00000100413.16	POLR3H	chr22_41542822_G_A_b38	rs5758386	1.3e-09	-0.41	Muscle - Skeletal	G	A	0.0675743	0.178868	0.1
ENSG00000100413.16	POLR3H	chr22_41812668_A_G_b38	rs6002503	3e-07	-0.15	Muscle - Skeletal	A	G	0.0292772	0.440493	0.1
ENSG00000100413.16	POLR3H	chr22_41232201_A_G_b38	rs8135059	1.9e-05	-0.36	Muscle - Skeletal	A	G	0.0841843	0.053914	0.1
ENSG00000100413.16	POLR3H	chr22_40819179_A_G_b38	rs5758092	1.9e-05	-0.23	Muscle - Skeletal	A	G	0.0537844	0.122538	0.1
ENSG00000100413.16	POLR3H	chr22_41548755_C_T_b38	rs13058723	2e-05	-0.17	Muscle - Skeletal	C	T	0.0398603	0.122737	0.1
ENSG00000100413.16	POLR3H	chr22_41979757_T_G_b38	rs5758527	2.4e-05	0.12	Muscle - Skeletal	T	G	0.0284091	0.444771	0.1
ENSG00000100413.16	POLR3H	chr22_42247894_T_A_b38	rs2839707	3.2e-05	0.53	Muscle - Skeletal	T	A	0.127442	0.003594	0.1
ENSG00000100413.16	POLR3H	chr22_41968428_C_T_b38	rs77350866	0.0002	0.29	Muscle - Skeletal	C	T	0.0779776	0.009185	0.1
ENSG00000186141.8	POLR3C	chr1_145801891_G_A_b38	rs10797655	0.00012	0.092	Muscle - Skeletal	G	A	0.0239202	0.423522	0.1
ENSG00000113356.11	POLR3G	chr5_90558631_G_C_b38	rs154568	1.2e-13	-0.25	Muscle - Skeletal	G	C	0.0337073	0.430465	0.1
ENSG00000113356.11	POLR3G	chr5_90737555_C_T_b38	rs13174802	0.00024	-0.27	Muscle - Skeletal	C	T	0.0735154	0.048804	0.1
ENSG00000113356.11	POLR3G	chr5_90467696_A_G_b38	rs13436287	0.00025	-0.14	Muscle - Skeletal	A	G	0.0382278	0.369137	0.1
ENSG00000121851.12	POLR3GL	chr1_146561406_C_T_b38	rs1305668456	9.4e-05	0.35	Muscle - Skeletal	C	T	0.0896154	0.031449	0.1

## Sheet: Pol II
Adipose Visceral
Gencode	Gene	Variant.Id	SNP	PVal	beta	Tissue	other_allele	effect_allele	se	eaf	LDthreshold
ENSG00000144231.10	POLR2D	chr2_126904810_C_T_b38	rs6733255	6.2e-05	0.18	Adipose - Visceral (Omentum)	C	T	0.0449431	0.238076	0.1
ENSG00000144231.10	POLR2D	chr2_127828045_A_G_b38	rs335135	7.9e-05	-0.096	Adipose - Visceral (Omentum)	A	G	0.0243197	0.353462	0.1
ENSG00000105258.8	POLR2I	chr19_36108361_C_A_b38	rs77675107	4.5e-05	0.35	Adipose - Visceral (Omentum)	C	A	0.0857804	0.019086	0.1
ENSG00000005075.15	POLR2J	chr7_102447891_C_G_b38	rs3800985	6.4e-05	0.099	Adipose - Visceral (Omentum)	C	G	0.0247651	0.467252	0.1
ENSG00000005075.15	POLR2J	chr7_102018555_C_G_b38	rs9649239	8.2e-05	0.12	Adipose - Visceral (Omentum)	C	G	0.0304686	0.145696	0.1
ENSG00000005075.15	POLR2J	chr7_101792257_A_T_b38	rs12531332	9.9e-05	0.13	Adipose - Visceral (Omentum)	A	T	0.033393	0.138112	0.1
ENSG00000147669.10	POLR2K	chr8_101061301_C_T_b38	rs75595445	2.5e-06	0.42	Adipose - Visceral (Omentum)	C	T	0.0892074	0.04622	0.1
ENSG00000177700.5	POLR2L	chr11_828784_A_G_b38	rs28507876	2.1e-06	-0.095	Adipose - Visceral (Omentum)	A	G	0.0200272	0.173964	0.1
Colon Transverse
Gencode	Gene	Variant.Id	SNP	PVal	beta	Tissue	other_allele	effect_allele	se	eaf	LDthreshold
ENSG00000102978.12	POLR2C	chr16_57426129_A_G_b38	rs186482	1.2e-05	-0.15	Colon - Transverse	A	G	0.0342654	0.216872	0.1
ENSG00000005075.15	POLR2J	chr7_102461063_A_G_b38	rs4989124	8.4e-06	0.14	Colon - Transverse	A	G	0.0314273	0.293493	0.1
ENSG00000005075.15	POLR2J	chr7_102976540_T_C_b38	rs66712128	9.5e-05	0.14	Colon - Transverse	T	C	0.0358697	0.204675	0.1
ENSG00000005075.15	POLR2J	chr7_103146934_A_C_b38	rs6465906	0.00011	0.12	Colon - Transverse	A	C	0.0310286	0.357275	0.1
ENSG00000144231.10	POLR2D	chr2_127652331_A_G_b38	rs1047760	5e-07	0.19	Colon - Transverse	A	G	0.0378011	0.37212	0.1
ENSG00000144231.10	POLR2D	chr2_128731982_G_A_b38	rs6744496	6.6e-05	-0.15	Colon - Transverse	G	A	0.0375915	0.336603	0.1
ENSG00000144231.10	POLR2D	chr2_127818006_C_T_b38	rs10515925	7.5e-05	-0.21	Colon - Transverse	C	T	0.0530324	0.116059	0.1
Pancreas
Gencode	Gene	Variant.Id	SNP	PVal	beta	Tissue	other_allele	effect_allele	se	eaf	LDthreshold
ENSG00000047315.15	POLR2B	chr4_57555369_C_G_b38	rs113982254	3.9e-05	0.15	Pancreas	C	G	0.0364668	0.184649	0.1
ENSG00000005075.15	POLR2J	chr7_102476975_G_A_b38	rs560502516	8.4e-06	-0.67	Pancreas	G	A	0.150402	0.05221	0.1
ENSG00000144231.10	POLR2D	chr2_127815279_G_A_b38	rs335128	1.9e-07	-0.31	Pancreas	G	A	0.0595139	0.334461	0.1
ENSG00000144231.10	POLR2D	chr2_127718910_C_T_b38	rs7595381	5e-07	-0.31	Pancreas	C	T	0.0616754	0.246313	0.1
ENSG00000144231.10	POLR2D	chr2_127643516_A_G_b38	rs2244507	1.8e-05	-0.25	Pancreas	A	G	0.0582974	0.345584	0.1
Pituitary
Gencode	Gene	Variant.Id	SNP	PVal	beta	Tissue	other_allele	effect_allele	se	eaf	LDthreshold
ENSG00000105258.8	POLR2I	chr19_36026753_C_T_b38	rs10418015	1.6e-05	0.19	Pituitary	C	T	0.044038	0.490103	0.1
ENSG00000105258.8	POLR2I	chr19_36091819_T_C_b38	rs117570606	3.8e-05	0.38	Pituitary	T	C	0.0922483	0.040533	0.1
ENSG00000105258.8	POLR2I	chr19_35994622_G_C_b38	rs114585215	5e-05	0.46	Pituitary	G	C	0.113423	0.056272	0.1
ENSG00000144231.10	POLR2D	chr2_127815279_G_A_b38	rs335128	5.9e-06	-0.24	Pituitary	G	A	0.0529808	0.334461	0.1
ENSG00000144231.10	POLR2D	chr2_127639843_T_C_b38	rs2254680	5.8e-05	-0.23	Pituitary	T	C	0.0572025	0.350815	0.1
Small intestine
Gencode	Gene	Variant.Id	SNP	PVal	beta	Tissue	other_allele	effect_allele	se	eaf	LDthreshold
ENSG00000005075.15	POLR2J	chr7_102478892_G_T_b38	rs761166373	2.5e-08	-0.89	Small Intestine - Terminal Ileum	G	T	0.159691	0.02648	0.1
ENSG00000144231.10	POLR2D	chr2_127664255_G_A_b38	rs79110686	3.6e-06	0.32	Small Intestine - Terminal Ileum	G	A	0.0690663	0.36845	0.1
ENSG00000144231.10	POLR2D	chr2_127826200_A_G_b38	rs10171345	3e-05	-0.29	Small Intestine - Terminal Ileum	A	G	0.0694866	0.227713	0.1
Brain-cortex
Gencode	Gene	Variant.Id	SNP	PVal	beta	Tissue	other_allele	effect_allele	se	eaf	LDthreshold
ENSG00000102978.12	POLR2C	chr16_57681298_C_T_b38	rs56414425	8e-06	-0.65	Brain - Cortex	C	T	0.145571	0.041821	0.1
ENSG00000102978.12	POLR2C	chr16_57372943_C_T_b38	rs183419	1.3e-05	-0.26	Brain - Cortex	C	T	0.0596316	0.141213	0.1
ENSG00000105258.8	POLR2I	chr19_36026753_C_T_b38	rs10418015	1.2e-08	0.25	Brain - Cortex	C	T	0.0438618	0.490103	0.1
ENSG00000105258.8	POLR2I	chr19_36114973_G_T_b38	rs2231569	2.6e-05	0.49	Brain - Cortex	G	T	0.116502	0.031501	0.1
ENSG00000105258.8	POLR2I	chr19_36135828_C_A_b38	rs12610853	7.9e-05	0.21	Brain - Cortex	C	A	0.0531994	0.336964	0.1
ENSG00000144231.10	POLR2D	chr2_127643516_A_G_b38	rs2244507	1.7e-07	-0.32	Brain - Cortex	A	G	0.0611917	0.345584	0.1
ENSG00000144231.10	POLR2D	chr2_127815279_G_A_b38	rs335128	9.4e-06	-0.3	Brain - Cortex	G	A	0.0677119	0.334461	0.1
ENSG00000144231.10	POLR2D	chr2_127738071_G_A_b38	rs6754215	2.3e-05	-0.24	Brain - Cortex	G	A	0.0566896	0.455539	0.1
ENSG00000144231.10	POLR2D	chr2_128043893_C_T_b38	rs61525479	6.1e-05	0.24	Brain - Cortex	C	T	0.0598667	0.379802	0.1
Liver
Gencode	Gene	Variant.Id	SNP	PVal	beta	Tissue	other_allele	effect_allele	se	eaf	LDthreshold
ENSG00000144231.10	POLR2D	chr2_127652331_A_G_b38	rs1047760	1.2e-07	0.28	Liver	A	G	0.0528951	0.37212	0.1
ENSG00000144231.10	POLR2D	chr2_128041854_C_T_b38	rs4577233	1.3e-05	0.27	Liver	C	T	0.0619251	0.2607	0.1
Muscle-skeletal
Gencode	Gene	Variant.Id	SNP	PVal	beta	Tissue	other_allele	effect_allele	se	eaf	LDthreshold
ENSG00000047315.15	POLR2B	chr4_57033927_C_T_b38	rs1277309	1.9e-05	-0.11	Muscle - Skeletal	C	T	0.025723	0.106685	0.1
ENSG00000047315.15	POLR2B	chr4_56843713_T_C_b38	rs11731657	0.00015	-0.065	Muscle - Skeletal	T	C	0.0171456	0.177915	0.1
ENSG00000005075.15	POLR2J	chr7_102693779_T_C_b38	rs139360617	5.5e-05	-0.2	Muscle - Skeletal	T	C	0.0495872	0.048763	0.1
ENSG00000005075.15	POLR2J	chr7_102444759_A_G_b38	rs10953366	6.2e-05	0.097	Muscle - Skeletal	A	G	0.0242193	0.28165	0.1
ENSG00000005075.15	POLR2J	chr7_103376051_C_T_b38	rs115380102	7.3e-05	0.17	Muscle - Skeletal	C	T	0.0428612	0.063826	0.1
ENSG00000005075.15	POLR2J	chr7_101925261_A_G_b38	rs13241958	0.00019	0.071	Muscle - Skeletal	A	G	0.0190249	0.238419	0.1
ENSG00000005075.15	POLR2J	chr7_102210278_A_G_b38	rs401236	0.00024	-0.16	Muscle - Skeletal	A	G	0.0435647	0.042995	0.1
ENSG00000105258.8	POLR2I	chr19_35989772_C_A_b38	rs7248046	0.00018	-0.11	Muscle - Skeletal	C	A	0.0293682	0.100702	0.1
ENSG00000105258.8	POLR2I	chr19_36049278_C_A_b38	rs12977814	0.0002	0.077	Muscle - Skeletal	C	A	0.0207044	0.290339	0.1
ENSG00000144231.10	POLR2D	chr2_127885051_T_G_b38	rs13421416	3.4e-13	-0.18	Muscle - Skeletal	T	G	0.0247337	0.445083	0.1
ENSG00000144231.10	POLR2D	chr2_127664255_G_A_b38	rs79110686	1.2e-08	0.14	Muscle - Skeletal	G	A	0.0245626	0.36845	0.1
ENSG00000144231.10	POLR2D	chr2_127888504_G_A_b38	rs6714283	6.1e-08	-0.26	Muscle - Skeletal	G	A	0.0480073	0.125615	0.1
ENSG00000144231.10	POLR2D	chr2_127650196_C_T_b38	rs1820971	9.6e-07	-0.13	Muscle - Skeletal	C	T	0.0265324	0.250655	0.1
ENSG00000144231.10	POLR2D	chr2_127655971_A_G_b38	rs34071492	1.3e-05	-0.16	Muscle - Skeletal	A	G	0.0366964	0.116657	0.1
ENSG00000144231.10	POLR2D	chr2_127635714_T_C_b38	rs2255177	1.4e-05	-0.11	Muscle - Skeletal	T	C	0.0253231	0.315424	0.1
ENSG00000144231.10	POLR2D	chr2_127924112_C_T_b38	rs188860117	1.5e-05	0.25	Muscle - Skeletal	C	T	0.0577542	0.028749	0.1
ENSG00000144231.10	POLR2D	chr2_127642349_T_C_b38	rs2244655	2.8e-05	-0.2	Muscle - Skeletal	T	C	0.0477424	0.095887	0.1
ENSG00000144231.10	POLR2D	chr2_127651763_G_C_b38	rs35201354	3.4e-05	-0.15	Muscle - Skeletal	G	C	0.0361893	0.103961	0.1
ENSG00000144231.10	POLR2D	chr2_127653654_G_A_b38	rs11552767	3.8e-05	0.15	Muscle - Skeletal	G	A	0.0364138	0.109162	0.1
ENSG00000144231.10	POLR2D	chr2_128040055_A_T_b38	rs116545764	4.7e-05	0.25	Muscle - Skeletal	A	T	0.0614241	0.033729	0.1
ENSG00000144231.10	POLR2D	chr2_127989975_T_G_b38	rs17262104	6.3e-05	-0.2	Muscle - Skeletal	T	G	0.049984	0.0469	0.1
ENSG00000144231.10	POLR2D	chr2_127269903_C_T_b38	rs138383679	0.00011	0.43	Muscle - Skeletal	C	T	0.111186	0.00761	0.1
ENSG00000144231.10	POLR2D	chr2_127193328_A_T_b38	rs885276	0.00016	0.091	Muscle - Skeletal	A	T	0.0241059	0.439006	0.1
ENSG00000168002.11	POLR2G	chr11_63125620_G_A_b38	rs142696626	3.7e-05	-0.42	Muscle - Skeletal	G	A	0.101807	0.006687	0.1
ENSG00000177700.5	POLR2L	chr11_828916_G_A_b38	rs7126805	8.7e-12	-0.15	Muscle - Skeletal	G	A	0.0219731	0.431709	0.1
ENSG00000177700.5	POLR2L	chr11_851623_T_A_b38	rs7946756	6.1e-11	-0.14	Muscle - Skeletal	T	A	0.0214026	0.436907	0.1
ENSG00000177700.5	POLR2L	chr11_829585_C_A_b38	rs35257975	1.4e-06	0.23	Muscle - Skeletal	C	A	0.0476683	0.032722	0.1
ENSG00000177700.5	POLR2L	chr11_856020_T_C_b38	rs61867550	4.1e-06	-0.26	Muscle - Skeletal	T	C	0.0564451	0.030792	0.1
ENSG00000177700.5	POLR2L	chr11_818140_T_C_b38	rs34284803	1e-05	-0.12	Muscle - Skeletal	T	C	0.0271667	0.127034	0.1
ENSG00000177700.5	POLR2L	chr11_745884_C_T_b38	rs7936322	2e-05	-0.086	Muscle - Skeletal	C	T	0.0201646	0.464499	0.1
ENSG00000177700.5	POLR2L	chr11_819507_G_A_b38	rs148815011	0.00015	0.2	Muscle - Skeletal	G	A	0.0527556	0.024065	0.1

## Sheet: Pol I
Adipose Visceral
Gencode	Gene	Variant.Id	SNP	PVal	beta	Tissue	other_allele	effect_allele	se	eaf	LDthreshold
ENSG00000068654.15	POLR1A	chr2_85822344_C_T_b38	rs60375821	4.9e-08	-0.2	Adipose - Visceral (Omentum)	C	T	0.0366643	0.11554	0.1
ENSG00000068654.15	POLR1A	chr2_86307398_G_A_b38	rs13024436	1.1e-05	0.097	Adipose - Visceral (Omentum)	G	A	0.0220629	0.325589	0.1
ENSG00000068654.15	POLR1A	chr2_85959072_C_T_b38	rs73943920	3.2e-05	-0.22	Adipose - Visceral (Omentum)	C	T	0.0529006	0.053296	0.1
ENSG00000068654.15	POLR1A	chr2_85942421_T_C_b38	rs2218035	8.4e-05	0.086	Adipose - Visceral (Omentum)	T	C	0.021868	0.397955	0.1
ENSG00000068654.15	POLR1A	chr2_86163907_C_G_b38	rs150954178	8.5e-05	-0.27	Adipose - Visceral (Omentum)	C	G	0.068705	0.0208	0.1
ENSG00000068654.15	POLR1A	chr2_86578822_A_T_b38	rs150662153	0.00011	-0.22	Adipose - Visceral (Omentum)	A	T	0.0568857	0.017376	0.1
ENSG00000068654.15	POLR1A	chr2_86038617_G_A_b38	rs114068877	0.00012	-0.27	Adipose - Visceral (Omentum)	G	A	0.0702005	0.016845	0.1
ENSG00000125630.15	POLR1B	chr2_112492952_T_C_b38	rs57492581	4e-15	0.48	Adipose - Visceral (Omentum)	T	C	0.0611081	0.06374	0.1
ENSG00000125630.15	POLR1B	chr2_112554540_A_G_b38	rs11689338	3.9e-07	-0.15	Adipose - Visceral (Omentum)	A	G	0.0295638	0.353163	0.1
ENSG00000125630.15	POLR1B	chr2_112613265_A_G_b38	rs145935842	4.7e-07	0.54	Adipose - Visceral (Omentum)	A	G	0.107182	0.0086	0.1
ENSG00000125630.15	POLR1B	chr2_112352640_T_C_b38	rs60818406	4.9e-07	0.19	Adipose - Visceral (Omentum)	T	C	0.037772	0.17721	0.1
ENSG00000125630.15	POLR1B	chr2_111893618_G_A_b38	rs55877375	1.6e-06	0.33	Adipose - Visceral (Omentum)	G	A	0.068774	0.047722	0.1
ENSG00000125630.15	POLR1B	chr2_112226324_C_A_b38	rs111459259	5.5e-06	0.32	Adipose - Visceral (Omentum)	C	A	0.0704109	0.018013	0.1
ENSG00000125630.15	POLR1B	chr2_112151335_C_G_b38	rs144672004	1.6e-05	0.55	Adipose - Visceral (Omentum)	C	G	0.127479	0.011377	0.1
ENSG00000125630.15	POLR1B	chr2_112709766_G_A_b38	rs62157381	0.0001	0.24	Adipose - Visceral (Omentum)	G	A	0.0616873	0.043093	0.1
ENSG00000125630.15	POLR1B	chr2_112848983_G_A_b38	rs34625869	0.00012	0.46	Adipose - Visceral (Omentum)	G	A	0.119601	0.014148	0.1
ENSG00000066379.14	ZNRD1	chr6_29765901_A_G_b38	rs11756053	6.9e-12	0.4	Adipose - Visceral (Omentum)	A	G	0.0583115	0.13706	0.1
ENSG00000066379.14	ZNRD1	chr6_29945293_G_C_b38	rs111820297	8.1e-12	0.45	Adipose - Visceral (Omentum)	G	C	0.0658206	0.061502	0.1
ENSG00000066379.14	ZNRD1	chr6_29786616_G_A_b38	rs114802991	1.8e-09	0.5	Adipose - Visceral (Omentum)	G	A	0.0831269	0.0128	0.1
ENSG00000066379.14	ZNRD1	chr6_29987379_A_T_b38	rs17187049	5.3e-09	0.41	Adipose - Visceral (Omentum)	A	T	0.0702359	0.023	0.1
ENSG00000066379.14	ZNRD1	chr6_29955574_G_A_b38	rs2904758	1.4e-05	-0.15	Adipose - Visceral (Omentum)	G	A	0.0345315	0.33818	0.1
ENSG00000066379.14	ZNRD1	chr6_29953458_C_T_b38	rs9260532	1.6e-05	-0.16	Adipose - Visceral (Omentum)	C	T	0.0370847	0.18373	0.1
ENSG00000066379.14	ZNRD1	chr6_29843168_G_A_b38	rs2734995	2.8e-05	0.18	Adipose - Visceral (Omentum)	G	A	0.0429681	0.1828	0.1
ENSG00000066379.14	ZNRD1	chr6_29765924_G_A_b38	rs2735048	8.9e-05	0.14	Adipose - Visceral (Omentum)	G	A	0.0357254	0.303914	0.1
ENSG00000066379.14	ZNRD1	chr6_29479768_C_T_b38	rs114570214	0.00012	0.45	Adipose - Visceral (Omentum)	C	T	0.117001	0.011629	0.1
ENSG00000066379.14	ZNRD1	chr6_29977202_G_C_b38	rs2735071	0.00012	0.16	Adipose - Visceral (Omentum)	G	C	0.0416003	0.192369	0.1
ENSG00000066379.14	ZNRD1	chr6_29871746_C_T_b38	rs28465400	0.00013	0.22	Adipose - Visceral (Omentum)	C	T	0.0574944	0.12699	0.1
ENSG00000066379.14	ZNRD1	chr6_29490464_A_G_b38	rs1233493	0.00019	-0.22	Adipose - Visceral (Omentum)	A	G	0.0589503	0.101263	0.1
ENSG00000066379.14	ZNRD1	chr6_29392143_T_A_b38	rs111692788	0.0002	0.4	Adipose - Visceral (Omentum)	T	A	0.107555	0.029766	0.1
ENSG00000066379.14	ZNRD1	chr6_29462436_G_A_b38	rs17184086	0.00023	-0.49	Adipose - Visceral (Omentum)	G	A	0.133024	0.009557	0.1
ENSG00000105849.5	TWISTNB	chr7_19706821_A_C_b38	rs72591432	4.1e-06	0.17	Adipose - Visceral (Omentum)	A	C	0.0369064	0.131445	0.1
ENSG00000137054.15	POLR1E	chr9_37434944_A_C_b38	rs10973336	6.1e-05	0.3	Adipose - Visceral (Omentum)	A	C	0.0748333	0.043859	0.1
ENSG00000137054.15	POLR1E	chr9_37480143_G_C_b38	rs12685996	9.1e-05	0.19	Adipose - Visceral (Omentum)	G	C	0.0485509	0.132134	0.1
ENSG00000117877.10	CD3EAP	chr19_45431495_C_T_b38	rs7259762	2.3e-06	-0.19	Adipose - Visceral (Omentum)	C	T	0.0402108	0.229928	0.1
ENSG00000117877.10	CD3EAP	chr19_45364001_C_T_b38	rs1799793	1.3e-05	-0.15	Adipose - Visceral (Omentum)	C	T	0.0344028	0.267022	0.1
Colon Transverse
Gencode	Gene	Variant.Id	SNP	PVal	beta	Tissue	other_allele	effect_allele	se	eaf	LDthreshold
ENSG00000068654.15	POLR1A	chr2_86038617_G_A_b38	rs114068877	5.8e-09	-0.56	Colon - Transverse	G	A	0.0961799	0.016845	0.1
ENSG00000068654.15	POLR1A	chr2_85822344_C_T_b38	rs60375821	2.4e-08	-0.28	Colon - Transverse	C	T	0.0501758	0.11554	0.1
ENSG00000068654.15	POLR1A	chr2_85940706_C_T_b38	rs2033770	5.6e-07	0.15	Colon - Transverse	C	T	0.0299729	0.34718	0.1
ENSG00000068654.15	POLR1A	chr2_86155815_C_T_b38	rs114534559	6.6e-05	-0.43	Colon - Transverse	C	T	0.107762	0.022145	0.1
ENSG00000068654.15	POLR1A	chr2_86184859_G_A_b38	rs7567380	7e-05	0.12	Colon - Transverse	G	A	0.0301789	0.391278	0.1
ENSG00000068654.15	POLR1A	chr2_86112351_C_T_b38	rs115235811	7.6e-05	-0.25	Colon - Transverse	C	T	0.0631844	0.062982	0.1
ENSG00000068654.15	POLR1A	chr2_85838241_G_T_b38	rs11127002	0.00011	0.12	Colon - Transverse	G	T	0.0310286	0.449546	0.1
ENSG00000125630.15	POLR1B	chr2_112492952_T_C_b38	rs57492581	1.9e-15	0.66	Colon - Transverse	T	C	0.0830429	0.06374	0.1
ENSG00000125630.15	POLR1B	chr2_112487092_C_T_b38	rs10202834	2.8e-08	-0.22	Colon - Transverse	C	T	0.0396146	0.450328	0.1
ENSG00000125630.15	POLR1B	chr2_112151335_C_G_b38	rs144672004	1e-07	0.85	Colon - Transverse	C	G	0.159573	0.011377	0.1
ENSG00000125630.15	POLR1B	chr2_112613265_A_G_b38	rs145935842	1.4e-06	0.83	Colon - Transverse	A	G	0.172021	0.0086	0.1
ENSG00000125630.15	POLR1B	chr2_112653230_C_T_b38	rs62159879	7.7e-06	0.67	Colon - Transverse	C	T	0.149776	0.012322	0.1
ENSG00000125630.15	POLR1B	chr2_111893618_G_A_b38	rs55877375	1.7e-05	0.38	Colon - Transverse	G	A	0.0883508	0.047722	0.1
ENSG00000125630.15	POLR1B	chr2_112036094_G_A_b38	rs72825696	2.9e-05	0.42	Colon - Transverse	G	A	0.10045	0.032348	0.1
ENSG00000125630.15	POLR1B	chr2_112630196_G_C_b38	rs11680446	4.6e-05	-0.17	Colon - Transverse	G	C	0.041717	0.362327	0.1
ENSG00000125630.15	POLR1B	chr2_112227530_A_G_b38	rs72943913	4.8e-05	0.36	Colon - Transverse	A	G	0.0885575	0.041852	0.1
ENSG00000066379.14	ZNRD1	chr6_29765901_A_G_b38	rs11756053	3.2e-10	0.41	Colon - Transverse	A	G	0.0651956	0.13706	0.1
ENSG00000066379.14	ZNRD1	chr6_29987379_A_T_b38	rs17187049	7.9e-10	0.46	Colon - Transverse	A	T	0.0748342	0.023	0.1
ENSG00000066379.14	ZNRD1	chr6_29614189_C_G_b38	rs116708563	2.3e-07	0.58	Colon - Transverse	C	G	0.112114	0.01226	0.1
ENSG00000066379.14	ZNRD1	chr6_29892576_A_T_b38	rs2844817	4.3e-07	0.24	Colon - Transverse	A	T	0.0474761	0.15675	0.1
ENSG00000066379.14	ZNRD1	chr6_29813272_T_G_b38	rs1611182	2e-05	0.14	Colon - Transverse	T	G	0.0328262	0.416124	0.1
ENSG00000066379.14	ZNRD1	chr6_30222263_C_T_b38	rs2517602	5.7e-05	-0.15	Colon - Transverse	C	T	0.037268	0.25078	0.1
ENSG00000066379.14	ZNRD1	chr6_30102498_C_G_b38	rs2072109	6.4e-05	0.23	Colon - Transverse	C	G	0.0575352	0.06205	0.1
ENSG00000066379.14	ZNRD1	chr6_29646520_A_G_b38	rs73404772	6.7e-05	0.42	Colon - Transverse	A	G	0.10535	0.030165	0.1
ENSG00000066379.14	ZNRD1	chr6_29871746_C_T_b38	rs28465400	6.8e-05	0.24	Colon - Transverse	C	T	0.0602534	0.12699	0.1
ENSG00000066379.14	ZNRD1	chr6_29681832_G_A_b38	rs2982836	9.3e-05	0.15	Colon - Transverse	G	A	0.0383812	0.275941	0.1
ENSG00000066379.14	ZNRD1	chr6_29786616_G_A_b38	rs114802991	0.00011	0.34	Colon - Transverse	G	A	0.0879143	0.0128	0.1
ENSG00000066379.14	ZNRD1	chr6_29956382_C_G_b38	rs41265804	0.00013	-0.15	Colon - Transverse	C	G	0.0392007	0.212347	0.1
ENSG00000066379.14	ZNRD1	chr6_29975713_A_G_b38	rs2735076	0.00019	-0.14	Colon - Transverse	A	G	0.0375139	0.266167	0.1
ENSG00000117877.10	CD3EAP	chr19_45407414_A_G_b38	rs1046282	5.9e-05	-0.19	Colon - Transverse	A	G	0.0473016	0.293088	0.1
Pancreas
Gencode	Gene	Variant.Id	SNP	PVal	beta	Tissue	other_allele	effect_allele	se	eaf	LDthreshold
ENSG00000068654.15	POLR1A	chr2_86080686_C_T_b38	rs76158656	2.7e-07	-0.49	Pancreas	C	T	0.0952702	0.032095	0.1
ENSG00000068654.15	POLR1A	chr2_86210428_T_G_b38	rs7565645	1e-05	0.31	Pancreas	T	G	0.0701806	0.237021	0.1
ENSG00000068654.15	POLR1A	chr2_85822344_C_T_b38	rs60375821	1.3e-05	-0.29	Pancreas	C	T	0.0665122	0.11554	0.1
ENSG00000068654.15	POLR1A	chr2_85940706_C_T_b38	rs2033770	6.8e-05	0.17	Pancreas	C	T	0.0426795	0.34718	0.1
ENSG00000068654.15	POLR1A	chr2_86053373_T_C_b38	rs17026854	0.0001	-0.35	Pancreas	T	C	0.0899606	0.045689	0.1
ENSG00000125630.15	POLR1B	chr2_112471211_C_T_b38	rs62157489	2.7e-09	1	Pancreas	C	T	0.168099	0.018357	0.1
ENSG00000125630.15	POLR1B	chr2_112609167_C_T_b38	rs62158651	1.5e-08	0.94	Pancreas	C	T	0.166032	0.017537	0.1
ENSG00000125630.15	POLR1B	chr2_112344343_T_C_b38	rs58360798	3.9e-07	0.35	Pancreas	T	C	0.0689822	0.219259	0.1
ENSG00000125630.15	POLR1B	chr2_112536764_G_A_b38	rs10153558	1.3e-06	0.32	Pancreas	G	A	0.0661191	0.312504	0.1
ENSG00000125630.15	POLR1B	chr2_112614060_C_A_b38	rs60064657	2.9e-06	1	Pancreas	C	A	0.213777	0.121605	0.1
ENSG00000125630.15	POLR1B	chr2_112602595_G_A_b38	rs34725617	1.4e-05	-0.26	Pancreas	G	A	0.0598546	0.400537	0.1
ENSG00000125630.15	POLR1B	chr2_112149596_G_A_b38	rs72831614	2.8e-05	0.56	Pancreas	G	A	0.133679	0.057068	0.1
ENSG00000125630.15	POLR1B	chr2_112151335_C_G_b38	rs144672004	5.4e-05	1	Pancreas	C	G	0.247672	0.011377	0.1
ENSG00000125630.15	POLR1B	chr2_112710612_T_C_b38	rs62157382	5.7e-05	0.54	Pancreas	T	C	0.134165	0.046326	0.1
ENSG00000066379.14	ZNRD1	chr6_29942488_G_A_b38	rs41545520	3.8e-08	0.5	Pancreas	G	A	0.0909107	0.05941	0.1
ENSG00000066379.14	ZNRD1	chr6_29814188_C_G_b38	rs543438530	5e-08	0.47	Pancreas	C	G	0.0862178	0.09155	0.1
ENSG00000066379.14	ZNRD1	chr6_29948371_T_A_b38	rs9260287	7.3e-08	0.47	Pancreas	T	A	0.0873018	0.09195	0.1
ENSG00000066379.14	ZNRD1	chr6_29614189_C_G_b38	rs116708563	1.7e-05	0.69	Pancreas	C	G	0.160426	0.01226	0.1
ENSG00000066379.14	ZNRD1	chr6_29931900_G_A_b38	rs2524005	3.1e-05	0.2	Pancreas	G	A	0.0480078	0.1747	0.1
ENSG00000066379.14	ZNRD1	chr6_30143294_G_A_b38	rs117432766	6.8e-05	0.65	Pancreas	G	A	0.163186	0.020832	0.1
ENSG00000066379.14	ZNRD1	chr6_29979145_G_C_b38	rs2508034	0.00011	0.2	Pancreas	G	C	0.0517143	0.18128	0.1
ENSG00000066379.14	ZNRD1	chr6_29931960_A_G_b38	rs9259915	0.00013	-0.34	Pancreas	A	G	0.088855	0.04599	0.1
ENSG00000137054.15	POLR1E	chr9_37550639_T_C_b38	rs10758438	1.5e-07	-0.14	Pancreas	T	C	0.0266537	0.434021	0.1
ENSG00000137054.15	POLR1E	chr9_37452146_G_A_b38	rs75758970	7.7e-06	-0.19	Pancreas	G	A	0.0424737	0.113406	0.1
ENSG00000117877.10	CD3EAP	chr19_45401501_T_C_b38	rs4802252	2.5e-05	-0.24	Pancreas	T	C	0.0569422	0.448847	0.1
Pituitary
Gencode	Gene	Variant.Id	SNP	PVal	beta	Tissue	other_allele	effect_allele	se	eaf	LDthreshold
ENSG00000068654.15	POLR1A	chr2_86038617_G_A_b38	rs114068877	2.8e-08	-0.86	Pituitary	G	A	0.154857	0.016845	0.1
ENSG00000068654.15	POLR1A	chr2_86155815_C_T_b38	rs114534559	2.4e-07	-0.87	Pituitary	C	T	0.16843	0.022145	0.1
ENSG00000068654.15	POLR1A	chr2_86230616_C_T_b38	rs10201457	9.1e-07	0.23	Pituitary	C	T	0.0468416	0.422822	0.1
ENSG00000068654.15	POLR1A	chr2_86079128_T_C_b38	rs7562837	2.9e-06	-0.38	Pituitary	T	C	0.0812351	0.217401	0.1
ENSG00000068654.15	POLR1A	chr2_85758786_C_T_b38	rs77397999	1.8e-05	-0.81	Pituitary	C	T	0.188884	0.011952	0.1
ENSG00000068654.15	POLR1A	chr2_86360235_A_G_b38	rs145290257	1.9e-05	-0.46	Pituitary	A	G	0.107569	0.030858	0.1
ENSG00000068654.15	POLR1A	chr2_86034956_C_T_b38	rs142439341	3.9e-05	-0.55	Pituitary	C	T	0.133712	0.024976	0.1
ENSG00000068654.15	POLR1A	chr2_85940706_C_T_b38	rs2033770	5.4e-05	0.2	Pituitary	C	T	0.0495343	0.34718	0.1
ENSG00000125630.15	POLR1B	chr2_112502162_A_G_b38	rs34179430	2.4e-05	0.32	Pituitary	A	G	0.0757575	0.173216	0.1
ENSG00000125630.15	POLR1B	chr2_111682295_G_T_b38	rs181019792	4.2e-05	0.92	Pituitary	G	T	0.224599	0.017249	0.1
ENSG00000125630.15	POLR1B	chr2_111893618_G_A_b38	rs55877375	5.4e-05	0.59	Pituitary	G	A	0.146126	0.047722	0.1
ENSG00000125630.15	POLR1B	chr2_112433654_G_C_b38	rs28571589	6e-05	-0.25	Pituitary	G	C	0.0623005	0.28237	0.1
ENSG00000125630.15	POLR1B	chr2_112360071_G_A_b38	rs146495888	7.1e-05	0.75	Pituitary	G	A	0.188779	0.015435	0.1
ENSG00000125630.15	POLR1B	chr2_112535982_T_G_b38	rs3980067	8e-05	0.3	Pituitary	T	G	0.0760572	0.265783	0.1
ENSG00000066379.14	ZNRD1	chr6_29813272_T_G_b38	rs1611182	2.4e-07	0.31	Pituitary	T	G	0.0600154	0.416124	0.1
ENSG00000066379.14	ZNRD1	chr6_29765901_A_G_b38	rs11756053	5.1e-05	0.44	Pituitary	A	G	0.108615	0.13706	0.1
ENSG00000066379.14	ZNRD1	chr6_29942488_G_A_b38	rs41545520	8.9e-05	0.49	Pituitary	G	A	0.125039	0.05941	0.1
ENSG00000066379.14	ZNRD1	chr6_30372901_T_C_b38	rs115316399	9.6e-05	0.83	Pituitary	T	C	0.212794	0.033242	0.1
ENSG00000066379.14	ZNRD1	chr6_29765346_T_A_b38	rs9258278	0.0001	-0.48	Pituitary	T	A	0.123375	0.041887	0.1
ENSG00000066379.14	ZNRD1	chr6_29978025_G_C_b38	rs56052612	0.00013	0.42	Pituitary	G	C	0.109762	0.09536	0.1
ENSG00000066379.14	ZNRD1	chr6_29642504_C_A_b38	rs3131855	0.00014	-0.24	Pituitary	C	A	0.0630224	0.318861	0.1
ENSG00000105849.5	TWISTNB	chr7_19709077_G_A_b38	rs2072185	1.1e-10	0.46	Pituitary	G	A	0.0712899	0.264177	0.1
ENSG00000117877.10	CD3EAP	chr19_45399560_C_T_b38	rs11673653	1.1e-05	0.31	Pituitary	C	T	0.0705103	0.456629	0.1
ENSG00000117877.10	CD3EAP	chr19_45333267_T_C_b38	rs12975413	4.1e-05	-0.29	Pituitary	T	C	0.0707012	0.286797	0.1
ENSG00000117877.10	CD3EAP	chr19_45240294_T_A_b38	rs395893	4.9e-05	0.31	Pituitary	T	A	0.0763482	0.211844	0.1
Small intestine
Gencode	Gene	Variant.Id	SNP	PVal	beta	Tissue	other_allele	effect_allele	se	eaf	LDthreshold
ENSG00000068654.15	POLR1A	chr2_86003297_C_T_b38	rs78932428	2.9e-05	-0.41	Small Intestine - Terminal Ileum	C	T	0.0980584	0.047786	0.1
ENSG00000125630.15	POLR1B	chr2_112585105_C_T_b38	rs719667	1.1e-08	-0.38	Small Intestine - Terminal Ileum	C	T	0.066497	0.446834	0.1
ENSG00000125630.15	POLR1B	chr2_112071201_T_A_b38	rs4848992	6.3e-07	0.3	Small Intestine - Terminal Ileum	T	A	0.0602194	0.422524	0.1
ENSG00000125630.15	POLR1B	chr2_112485744_G_A_b38	rs3961919	1.3e-06	0.31	Small Intestine - Terminal Ileum	G	A	0.0640528	0.433635	0.1
ENSG00000125630.15	POLR1B	chr2_112713371_G_A_b38	rs62157383	7.8e-06	0.63	Small Intestine - Terminal Ileum	G	A	0.140921	0.080831	0.1
ENSG00000125630.15	POLR1B	chr2_112144650_G_A_b38	rs112165031	2.2e-05	0.61	Small Intestine - Terminal Ileum	G	A	0.143747	0.0465	0.1
ENSG00000125630.15	POLR1B	chr2_112609167_C_T_b38	rs62158651	2.4e-05	0.82	Small Intestine - Terminal Ileum	C	T	0.194129	0.017537	0.1
ENSG00000125630.15	POLR1B	chr2_112151335_C_G_b38	rs144672004	3.2e-05	0.99	Small Intestine - Terminal Ileum	C	G	0.238053	0.011377	0.1
ENSG00000125630.15	POLR1B	chr2_112474619_A_G_b38	rs6756835	4.4e-05	-0.77	Small Intestine - Terminal Ileum	A	G	0.188476	0.021999	0.1
ENSG00000066379.14	ZNRD1	chr6_29982804_A_G_b38	rs3734834	1.2e-05	0.48	Small Intestine - Terminal Ileum	A	G	0.109649	0.09148	0.1
ENSG00000066379.14	ZNRD1	chr6_29948371_T_A_b38	rs9260287	4.2e-05	0.51	Small Intestine - Terminal Ileum	T	A	0.124506	0.09195	0.1
ENSG00000066379.14	ZNRD1	chr6_29942488_G_A_b38	rs41545520	8.5e-05	0.47	Small Intestine - Terminal Ileum	G	A	0.119598	0.05941	0.1
ENSG00000066379.14	ZNRD1	chr6_29105911_C_T_b38	rs3130761	8.7e-05	0.77	Small Intestine - Terminal Ileum	C	T	0.196216	0.018348	0.1
ENSG00000066379.14	ZNRD1	chr6_29785031_A_G_b38	rs9258375	9.3e-05	-0.45	Small Intestine - Terminal Ileum	A	G	0.115144	0.06453	0.1
Brain-cortex
Gencode	Gene	Variant.Id	SNP	PVal	beta	Tissue	other_allele	effect_allele	se	eaf	LDthreshold
ENSG00000068654.15	POLR1A	chr2_86082176_A_G_b38	rs4832241	1.9e-07	0.36	Brain - Cortex	A	G	0.069113	0.270201	0.1
ENSG00000068654.15	POLR1A	chr2_86026385_A_T_b38	rs12124	2.4e-07	0.66	Brain - Cortex	A	T	0.127775	0.128849	0.1
ENSG00000068654.15	POLR1A	chr2_85822344_C_T_b38	rs60375821	1.5e-06	-0.4	Brain - Cortex	C	T	0.0831387	0.11554	0.1
ENSG00000125630.15	POLR1B	chr2_112492952_T_C_b38	rs57492581	2.9e-13	1.3	Brain - Cortex	T	C	0.178108	0.06374	0.1
ENSG00000125630.15	POLR1B	chr2_112554540_A_G_b38	rs11689338	3.8e-06	-0.43	Brain - Cortex	A	G	0.0930327	0.353163	0.1
ENSG00000125630.15	POLR1B	chr2_112352640_T_C_b38	rs60818406	1.6e-05	0.52	Brain - Cortex	T	C	0.120525	0.17721	0.1
ENSG00000125630.15	POLR1B	chr2_112848983_G_A_b38	rs34625869	1.8e-05	1.6	Brain - Cortex	G	A	0.373103	0.014148	0.1
ENSG00000125630.15	POLR1B	chr2_111932233_G_T_b38	rs186446441	2e-05	1.4	Brain - Cortex	G	T	0.328262	0.010449	0.1
ENSG00000125630.15	POLR1B	chr2_112226324_C_A_b38	rs111459259	4.8e-05	0.83	Brain - Cortex	C	A	0.204174	0.018013	0.1
ENSG00000066379.14	ZNRD1	chr6_29954977_C_T_b38	rs9260603	3.3e-05	0.32	Brain - Cortex	C	T	0.0770767	0.47416	0.1
ENSG00000066379.14	ZNRD1	chr6_29986847_A_T_b38	rs73725917	8.3e-05	0.65	Brain - Cortex	A	T	0.16516	0.151158	0.1
ENSG00000117877.10	CD3EAP	chr19_45400508_T_C_b38	rs4572514	5e-08	-0.42	Brain - Cortex	T	C	0.0770457	0.197087	0.1
ENSG00000117877.10	CD3EAP	chr19_45462799_G_A_b38	rs8106228	2.3e-05	-0.32	Brain - Cortex	G	A	0.0755861	0.244327	0.1
Liver
Gencode	Gene	Variant.Id	SNP	PVal	beta	Tissue	other_allele	effect_allele	se	eaf	LDthreshold
ENSG00000125630.15	POLR1B	chr2_112492952_T_C_b38	rs57492581	3.5e-08	0.53	Liver	T	C	0.0961122	0.06374	0.1
ENSG00000125630.15	POLR1B	chr2_112579037_G_A_b38	rs12618629	1.4e-07	-0.28	Liver	G	A	0.0531789	0.47545	0.1
ENSG00000125630.15	POLR1B	chr2_112226324_C_A_b38	rs111459259	2.7e-06	0.52	Liver	C	A	0.110817	0.018013	0.1
ENSG00000125630.15	POLR1B	chr2_112613265_A_G_b38	rs145935842	1.4e-05	0.7	Liver	A	G	0.161147	0.0086	0.1
ENSG00000066379.14	ZNRD1	chr6_29837569_T_C_b38	rs114474877	3.2e-06	0.83	Liver	T	C	0.178205	0.014824	0.1
ENSG00000066379.14	ZNRD1	chr6_29864555_A_G_b38	rs2524035	5.6e-05	-0.29	Liver	A	G	0.0719771	0.203389	0.1
ENSG00000066379.14	ZNRD1	chr6_30372901_T_C_b38	rs115316399	8.7e-05	-1.1	Liver	T	C	0.280308	0.033242	0.1
ENSG00000066379.14	ZNRD1	chr6_29948371_T_A_b38	rs9260287	9.2e-05	0.46	Liver	T	A	0.117624	0.09195	0.1
ENSG00000137054.15	POLR1E	chr9_37488012_C_T_b38	rs10758432	2.6e-05	0.42	Liver	C	T	0.0998588	0.16205	0.1
Muscle-skeletal
Gencode	Gene	Variant.Id	SNP	PVal	beta	Tissue	other_allele	effect_allele	se	eaf	LDthreshold
ENSG00000068654.15	POLR1A	chr2_86026385_A_T_b38	rs12124	9.5e-16	0.35	Muscle - Skeletal	A	T	0.0435694	0.128849	0.1
ENSG00000068654.15	POLR1A	chr2_86139449_T_C_b38	rs4832251	2e-15	0.18	Muscle - Skeletal	T	C	0.0226662	0.259218	0.1
ENSG00000068654.15	POLR1A	chr2_86451374_A_G_b38	rs144968911	4.9e-06	-0.39	Muscle - Skeletal	A	G	0.0853574	0.00395	0.1
ENSG00000068654.15	POLR1A	chr2_86081336_C_T_b38	rs4832240	1.1e-05	0.092	Muscle - Skeletal	C	T	0.0209256	0.268528	0.1
ENSG00000068654.15	POLR1A	chr2_85999310_A_C_b38	rs78134137	4.4e-05	-0.21	Muscle - Skeletal	A	C	0.0514025	0.029122	0.1
ENSG00000068654.15	POLR1A	chr2_85847265_A_C_b38	rs17026666	4.6e-05	-0.15	Muscle - Skeletal	A	C	0.0368092	0.073808	0.1
ENSG00000068654.15	POLR1A	chr2_85769999_C_T_b38	rs143181353	7.6e-05	-0.34	Muscle - Skeletal	C	T	0.0859307	0.009144	0.1
ENSG00000068654.15	POLR1A	chr2_86616296_T_C_b38	rs75150024	8.3e-05	-0.16	Muscle - Skeletal	T	C	0.0406549	0.064965	0.1
ENSG00000068654.15	POLR1A	chr2_86011263_T_C_b38	rs113380992	8.4e-05	-0.34	Muscle - Skeletal	T	C	0.0864548	0.007105	0.1
ENSG00000068654.15	POLR1A	chr2_85838241_G_T_b38	rs11127002	0.00011	0.077	Muscle - Skeletal	G	T	0.01991	0.449546	0.1
ENSG00000068654.15	POLR1A	chr2_85822344_C_T_b38	rs60375821	0.00012	-0.13	Muscle - Skeletal	C	T	0.0338002	0.11554	0.1
ENSG00000068654.15	POLR1A	chr2_85999251_T_C_b38	rs7599498	0.00019	-0.099	Muscle - Skeletal	T	C	0.0265277	0.143059	0.1
ENSG00000125630.15	POLR1B	chr2_112495675_G_A_b38	rs6542060	7e-05	0.074	Muscle - Skeletal	G	A	0.0186103	0.403683	0.1
ENSG00000125630.15	POLR1B	chr2_111736092_C_T_b38	rs56308561	0.00012	0.3	Muscle - Skeletal	C	T	0.0780006	0.0034	0.1
ENSG00000125630.15	POLR1B	chr2_113515809_G_T_b38	rs75162773	0.00019	0.074	Muscle - Skeletal	G	T	0.0198288	0.22251	0.1
ENSG00000125630.15	POLR1B	chr2_112619970_C_G_b38	rs6542066	0.00024	-0.08	Muscle - Skeletal	C	G	0.0217823	0.223437	0.1
ENSG00000066379.14	ZNRD1	chr6_29987379_A_T_b38	rs17187049	2.2e-26	0.64	Muscle - Skeletal	A	T	0.0602164	0.023	0.1
ENSG00000066379.14	ZNRD1	chr6_29765901_A_G_b38	rs11756053	8.9e-20	0.46	Muscle - Skeletal	A	G	0.0505405	0.13706	0.1
ENSG00000066379.14	ZNRD1	chr6_29814273_T_C_b38	rs72846610	6.1e-14	0.31	Muscle - Skeletal	T	C	0.0413007	0.1508	0.1
ENSG00000066379.14	ZNRD1	chr6_29786616_G_A_b38	rs114802991	6.8e-13	0.52	Muscle - Skeletal	G	A	0.0723891	0.0128	0.1
ENSG00000066379.14	ZNRD1	chr6_29904520_C_T_b38	rs1611519	1.6e-09	0.22	Muscle - Skeletal	C	T	0.0364604	0.14609	0.1
ENSG00000066379.14	ZNRD1	chr6_29068526_A_C_b38	rs2143575	2e-08	0.53	Muscle - Skeletal	A	C	0.0944405	0.015201	0.1
ENSG00000066379.14	ZNRD1	chr6_31013004_G_A_b38	rs116302426	6.2e-08	0.52	Muscle - Skeletal	G	A	0.0960662	0.009532	0.1
ENSG00000066379.14	ZNRD1	chr6_29871746_C_T_b38	rs28465400	1.8e-07	0.25	Muscle - Skeletal	C	T	0.0479029	0.12699	0.1
ENSG00000066379.14	ZNRD1	chr6_30102498_C_G_b38	rs2072109	8.4e-06	0.2	Muscle - Skeletal	C	G	0.0448961	0.06205	0.1
ENSG00000066379.14	ZNRD1	chr6_29743785_G_A_b38	rs9258222	2.2e-05	0.22	Muscle - Skeletal	G	A	0.0518432	0.096687	0.1
ENSG00000066379.14	ZNRD1	chr6_29930339_C_T_b38	rs2975009	2.8e-05	0.1	Muscle - Skeletal	C	T	0.0238712	0.49783	0.1
ENSG00000066379.14	ZNRD1	chr6_29068105_G_A_b38	rs73395702	3e-05	0.43	Muscle - Skeletal	G	A	0.103032	0.036696	0.1
ENSG00000066379.14	ZNRD1	chr6_29816779_C_A_b38	rs9258471	4.6e-05	-0.29	Muscle - Skeletal	C	A	0.0711644	0.030092	0.1
ENSG00000066379.14	ZNRD1	chr6_29433124_C_T_b38	rs73403386	6e-05	0.37	Muscle - Skeletal	C	T	0.0922047	0.043182	0.1
ENSG00000066379.14	ZNRD1	chr6_29962842_G_A_b38	rs7739434	0.00012	-0.13	Muscle - Skeletal	G	A	0.0338002	0.21838	0.1
ENSG00000066379.14	ZNRD1	chr6_29080912_A_T_b38	rs3129787	0.00013	-0.12	Muscle - Skeletal	A	T	0.0313606	0.253594	0.1
ENSG00000066379.14	ZNRD1	chr6_30239286_C_T_b38	rs2021365	0.00017	0.1	Muscle - Skeletal	C	T	0.0265966	0.461386	0.1
ENSG00000066379.14	ZNRD1	chr6_30815465_G_A_b38	rs9501489	0.00018	0.29	Muscle - Skeletal	G	A	0.0774252	0.064297	0.1
ENSG00000066379.14	ZNRD1	chr6_30056091_C_T_b38	rs3869070	0.00026	0.1	Muscle - Skeletal	C	T	0.0273807	0.48959	0.1
ENSG00000066379.14	ZNRD1	chr6_29681832_G_A_b38	rs2982836	0.00042	0.11	Muscle - Skeletal	G	A	0.0311863	0.275941	0.1
ENSG00000105849.5	TWISTNB	chr7_19709077_G_A_b38	rs2072185	1.3e-07	0.17	Muscle - Skeletal	G	A	0.032204	0.264177	0.1
ENSG00000105849.5	TWISTNB	chr7_19590216_A_G_b38	rs2390147	3.6e-05	0.13	Muscle - Skeletal	A	G	0.0314636	0.171457	0.1
ENSG00000105849.5	TWISTNB	chr7_19695639_A_C_b38	rs118010258	8.3e-05	0.46	Muscle - Skeletal	A	C	0.116883	0.009815	0.1
ENSG00000105849.5	TWISTNB	chr7_19625124_C_T_b38	rs10950741	0.0001	0.13	Muscle - Skeletal	C	T	0.0334139	0.148453	0.1
ENSG00000105849.5	TWISTNB	chr7_19007746_T_C_b38	rs2717369	0.0001	-0.096	Muscle - Skeletal	T	C	0.0246749	0.350246	0.1
ENSG00000105849.5	TWISTNB	chr7_19503337_C_T_b38	rs117584411	0.00015	0.26	Muscle - Skeletal	C	T	0.0685822	0.024588	0.1
ENSG00000137054.15	POLR1E	chr9_37543872_G_A_b38	rs10814575	7.2e-19	0.27	Muscle - Skeletal	G	A	0.0304337	0.483538	0.1
ENSG00000137054.15	POLR1E	chr9_37622930_A_C_b38	rs7031565	5.1e-17	-0.28	Muscle - Skeletal	A	C	0.0333955	0.24065	0.1
ENSG00000137054.15	POLR1E	chr9_37549283_C_T_b38	rs4878697	1.1e-11	0.21	Muscle - Skeletal	C	T	0.0309152	0.498117	0.1
ENSG00000137054.15	POLR1E	chr9_37393051_A_C_b38	rs12555254	4e-09	-0.29	Muscle - Skeletal	A	C	0.0492846	0.113329	0.1
ENSG00000137054.15	POLR1E	chr9_37689606_G_A_b38	rs113279421	3.5e-07	-0.62	Muscle - Skeletal	G	A	0.121704	0.016585	0.1
ENSG00000137054.15	POLR1E	chr9_37457576_G_C_b38	rs148353045	4.7e-07	-0.51	Muscle - Skeletal	G	C	0.101227	0.015346	0.1
ENSG00000137054.15	POLR1E	chr9_37427583_T_C_b38	rs1887454	5.8e-07	-0.15	Muscle - Skeletal	T	C	0.0300134	0.496444	0.1
ENSG00000137054.15	POLR1E	chr9_37443663_G_A_b38	rs79945793	3e-06	-0.39	Muscle - Skeletal	G	A	0.0834971	0.049487	0.1
ENSG00000137054.15	POLR1E	chr9_38194968_G_A_b38	rs62536941	5.6e-06	-0.19	Muscle - Skeletal	G	A	0.0418414	0.148538	0.1
ENSG00000137054.15	POLR1E	chr9_37679716_C_T_b38	rs28716551	2.4e-05	0.16	Muscle - Skeletal	C	T	0.0378788	0.173375	0.1
ENSG00000137054.15	POLR1E	chr9_38278121_C_A_b38	rs111972324	5.4e-05	-0.36	Muscle - Skeletal	C	A	0.0891618	0.023759	0.1
ENSG00000137054.15	POLR1E	chr9_37906725_C_G_b38	rs10973605	7.7e-05	-0.23	Muscle - Skeletal	C	G	0.0581756	0.090172	0.1
ENSG00000137054.15	POLR1E	chr9_37426155_A_G_b38	rs2768659	0.0001	-0.13	Muscle - Skeletal	A	G	0.0334139	0.436794	0.1
ENSG00000137054.15	POLR1E	chr9_37680497_A_T_b38	rs13284165	0.00011	0.12	Muscle - Skeletal	A	T	0.0310286	0.330812	0.1
ENSG00000117877.10	CD3EAP	chr19_45400148_C_T_b38	rs10401973	2.3e-27	-0.34	Muscle - Skeletal	C	T	0.0313741	0.418067	0.1
ENSG00000117877.10	CD3EAP	chr19_45464111_G_C_b38	rs8110514	3e-11	-0.24	Muscle - Skeletal	G	C	0.0361088	0.30989	0.1
ENSG00000117877.10	CD3EAP	chr19_45370684_G_C_b38	rs3810366	6.7e-09	-0.19	Muscle - Skeletal	G	C	0.0327684	0.424521	0.1
ENSG00000117877.10	CD3EAP	chr19_45404602_C_T_b38	rs928911	1.7e-08	-0.41	Muscle - Skeletal	C	T	0.0726944	0.064157	0.1
ENSG00000117877.10	CD3EAP	chr19_45388411_T_A_b38	rs10419767	2.9e-07	-0.32	Muscle - Skeletal	T	A	0.0623802	0.150144	0.1
ENSG00000117877.10	CD3EAP	chr19_45459541_A_G_b38	rs10415949	2.1e-06	-0.18	Muscle - Skeletal	A	G	0.0379462	0.323764	0.1
ENSG00000117877.10	CD3EAP	chr19_45544381_G_A_b38	rs9789254	1.4e-05	-0.15	Muscle - Skeletal	G	A	0.0345315	0.480832	0.1
ENSG00000117877.10	CD3EAP	chr19_45435171_C_A_b38	rs147387435	1.6e-05	-0.56	Muscle - Skeletal	C	A	0.129796	0.009268	0.1
ENSG00000117877.10	CD3EAP	chr19_45320405_A_G_b38	rs344818	2.8e-05	-0.14	Muscle - Skeletal	A	G	0.0334197	0.439523	0.1
ENSG00000117877.10	CD3EAP	chr19_45514537_C_G_b38	rs74253362	2.8e-05	-0.38	Muscle - Skeletal	C	G	0.0907105	0.03917	0.1
ENSG00000117877.10	CD3EAP	chr19_45332851_C_A_b38	rs60600938	3.4e-05	-0.28	Muscle - Skeletal	C	A	0.0675533	0.226584	0.1
ENSG00000117877.10	CD3EAP	chr19_45478197_T_C_b38	rs8103655	3.8e-05	-0.14	Muscle - Skeletal	T	C	0.0339862	0.494447	0.1
ENSG00000117877.10	CD3EAP	chr19_45334284_G_C_b38	rs116856032	5.5e-05	-0.26	Muscle - Skeletal	G	C	0.0644634	0.051559	0.1
ENSG00000117877.10	CD3EAP	chr19_45280939_G_A_b38	rs75816342	0.00011	-0.28	Muscle - Skeletal	G	A	0.0724	0.03135	0.1

## Sheet: RPs all
Adipose Visceral
Gencode	Gene	Variant.Id	SNP	PVal	beta	Tissue	other_allele	effect_allele	se	eaf	LDthreshold
ENSG00000168028.13	RPSA	chr3_39407090_T_G_b38	rs3772143	1.3e-56	-0.35	Adipose - Visceral (Omentum)	T	G	0.0220752	0.491733	0.1
ENSG00000168028.13	RPSA	chr3_39388404_G_C_b38	rs116547500	2.7e-16	-0.54	Adipose - Visceral (Omentum)	G	C	0.0659661	0.01699	0.1
ENSG00000168028.13	RPSA	chr3_39281672_A_C_b38	rs11715522	2.7e-11	0.18	Adipose - Visceral (Omentum)	A	C	0.0270186	0.359131	0.1
ENSG00000168028.13	RPSA	chr3_39235905_C_A_b38	rs74413342	1.3e-10	-0.29	Adipose - Visceral (Omentum)	C	A	0.0451209	0.093762	0.1
ENSG00000168028.13	RPSA	chr3_39452675_T_G_b38	rs116559528	4.3e-09	-0.28	Adipose - Visceral (Omentum)	T	G	0.0476821	0.058801	0.1
ENSG00000168028.13	RPSA	chr3_39485383_C_T_b38	rs1464047	5.1e-08	-0.15	Adipose - Visceral (Omentum)	C	T	0.0275341	0.39018	0.1
ENSG00000168028.13	RPSA	chr3_39538861_A_G_b38	rs113816188	4.6e-07	0.31	Adipose - Visceral (Omentum)	A	G	0.06148	0.031545	0.1
ENSG00000168028.13	RPSA	chr3_39236676_A_G_b38	rs62244208	5.6e-06	0.16	Adipose - Visceral (Omentum)	A	G	0.0352349	0.20058	0.1
ENSG00000168028.13	RPSA	chr3_39385601_C_T_b38	rs76664897	5.8e-06	0.29	Adipose - Visceral (Omentum)	C	T	0.0639675	0.04399	0.1
ENSG00000168028.13	RPSA	chr3_39223028_A_G_b38	rs4386433	1.2e-05	0.29	Adipose - Visceral (Omentum)	A	G	0.0662465	0.035444	0.1
ENSG00000168028.13	RPSA	chr3_39267617_G_C_b38	rs2669850	1.2e-05	-0.11	Adipose - Visceral (Omentum)	G	C	0.025128	0.452737	0.1
ENSG00000168028.13	RPSA	chr3_39376768_C_T_b38	rs62242640	2.7e-05	0.3	Adipose - Visceral (Omentum)	C	T	0.0714729	0.057084	0.1
ENSG00000168028.13	RPSA	chr3_39406928_C_T_b38	rs3772145	4.8e-05	-0.3	Adipose - Visceral (Omentum)	C	T	0.0737979	0.054076	0.1
ENSG00000168028.13	RPSA	chr3_39138368_T_C_b38	rs77110687	9.8e-05	-0.54	Adipose - Visceral (Omentum)	T	C	0.138622	0.006473	0.1
ENSG00000233927.4	RPS28	chr19_8322323_G_A_b38	rs1057232	3.5e-48	-0.36	Adipose - Visceral (Omentum)	G	A	0.0246829	0.41518	0.1
ENSG00000233927.4	RPS28	chr19_8343829_T_C_b38	rs113225496	3.2e-07	0.24	Adipose - Visceral (Omentum)	T	C	0.0469551	0.089457	0.1
ENSG00000233927.4	RPS28	chr19_8335767_C_G_b38	rs11669559	2.6e-05	-0.17	Adipose - Visceral (Omentum)	C	G	0.040419	0.141111	0.1
ENSG00000143947.13	RPS27A	chr2_55078339_A_T_b38	rs118151919	1.2e-05	-0.13	Adipose - Visceral (Omentum)	A	T	0.0296967	0.07787	0.1
ENSG00000197728.9	RPS26	chr12_56042145_C_G_b38	rs1131017	2.3e-203	-1.2	Adipose - Visceral (Omentum)	C	G	0.0394366	0.444089	0.1
ENSG00000197728.9	RPS26	chr12_56240799_C_G_b38	rs61937675	1.2e-12	0.55	Adipose - Visceral (Omentum)	C	G	0.0774062	0.099719	0.1
ENSG00000197728.9	RPS26	chr12_56116134_G_C_b38	rs144131441	8.5e-12	-0.79	Adipose - Visceral (Omentum)	G	C	0.115669	0.049579	0.1
ENSG00000197728.9	RPS26	chr12_56017922_G_A_b38	rs117396149	2.7e-09	0.94	Adipose - Visceral (Omentum)	G	A	0.158013	0.026158	0.1
ENSG00000197728.9	RPS26	chr12_55866386_C_G_b38	rs4417323	5.3e-08	0.39	Adipose - Visceral (Omentum)	C	G	0.0716788	0.188984	0.1
ENSG00000197728.9	RPS26	chr12_56189702_A_G_b38	rs11171773	4.1e-07	-0.59	Adipose - Visceral (Omentum)	A	G	0.116503	0.226101	0.1
ENSG00000197728.9	RPS26	chr12_56001636_T_A_b38	rs773126	4.3e-07	0.31	Adipose - Visceral (Omentum)	T	A	0.0613233	0.369721	0.1
ENSG00000197728.9	RPS26	chr12_56209697_T_C_b38	rs61939013	4.5e-07	0.71	Adipose - Visceral (Omentum)	T	C	0.140692	0.026591	0.1
ENSG00000197728.9	RPS26	chr12_55877049_T_C_b38	rs7484392	2.3e-06	-0.67	Adipose - Visceral (Omentum)	T	C	0.141796	0.048611	0.1
ENSG00000197728.9	RPS26	chr12_56220896_A_G_b38	rs79269008	3.8e-06	-0.9	Adipose - Visceral (Omentum)	A	G	0.19472	0.023001	0.1
ENSG00000197728.9	RPS26	chr12_55776004_T_C_b38	rs117427783	1.1e-05	0.68	Adipose - Visceral (Omentum)	T	C	0.154668	0.042196	0.1
ENSG00000197728.9	RPS26	chr12_56177027_G_A_b38	rs150823486	1.7e-05	-0.57	Adipose - Visceral (Omentum)	G	A	0.132526	0.045469	0.1
ENSG00000197728.9	RPS26	chr12_56072344_T_G_b38	rs12831884	2.7e-05	0.61	Adipose - Visceral (Omentum)	T	G	0.145328	0.044103	0.1
ENSG00000197728.9	RPS26	chr12_56134068_G_A_b38	rs79028003	5e-05	0.97	Adipose - Visceral (Omentum)	G	A	0.239174	0.012678	0.1
ENSG00000197728.9	RPS26	chr12_55971915_C_A_b38	rs2069414	5.3e-05	-0.55	Adipose - Visceral (Omentum)	C	A	0.136072	0.041972	0.1
ENSG00000197728.9	RPS26	chr12_56382802_G_A_b38	rs11171821	7.3e-05	-0.35	Adipose - Visceral (Omentum)	G	A	0.0882437	0.140566	0.1
ENSG00000118181.10	RPS25	chr11_119018475_T_C_b38	rs11217125	1.3e-06	-0.099	Adipose - Visceral (Omentum)	T	C	0.0204556	0.272884	0.1
ENSG00000138326.18	RPS24	chr10_77994341_A_G_b38	rs2818827	9.7e-22	0.19	Adipose - Visceral (Omentum)	A	G	0.0198329	0.483285	0.1
ENSG00000138326.18	RPS24	chr10_78149469_C_T_b38	rs75402468	5.4e-07	-0.23	Adipose - Visceral (Omentum)	C	T	0.0458942	0.057792	0.1
ENSG00000138326.18	RPS24	chr10_78769716_C_T_b38	rs77710836	4.6e-06	-0.38	Adipose - Visceral (Omentum)	C	T	0.0829287	0.015451	0.1
ENSG00000138326.18	RPS24	chr10_77953144_T_C_b38	rs117107008	3.8e-05	-0.38	Adipose - Visceral (Omentum)	T	C	0.0922483	0.005391	0.1
ENSG00000138326.18	RPS24	chr10_78192377_A_G_b38	rs1949737	5.2e-05	0.088	Adipose - Visceral (Omentum)	A	G	0.0217475	0.49831	0.1
ENSG00000186468.12	RPS23	chr5_82273474_A_C_b38	rs3738	9.3e-75	-0.44	Adipose - Visceral (Omentum)	A	C	0.0240521	0.32623	0.1
ENSG00000186468.12	RPS23	chr5_81924165_G_A_b38	rs686657	7e-12	0.18	Adipose - Visceral (Omentum)	G	A	0.026248	0.409648	0.1
ENSG00000186468.12	RPS23	chr5_81889354_T_C_b38	rs34659643	2.7e-07	0.18	Adipose - Visceral (Omentum)	T	C	0.0349972	0.211729	0.1
ENSG00000186468.12	RPS23	chr5_82261619_C_A_b38	rs13176457	5.6e-07	0.16	Adipose - Visceral (Omentum)	C	A	0.0319711	0.216853	0.1
ENSG00000186468.12	RPS23	chr5_82288339_C_T_b38	rs1963311	1e-05	0.17	Adipose - Visceral (Omentum)	C	T	0.0384861	0.131303	0.1
ENSG00000186468.12	RPS23	chr5_81841724_A_T_b38	rs13170880	1.9e-05	0.27	Adipose - Visceral (Omentum)	A	T	0.0631383	0.037942	0.1
ENSG00000186468.12	RPS23	chr5_81857094_A_C_b38	rs11955828	5.9e-05	-0.11	Adipose - Visceral (Omentum)	A	C	0.0273852	0.403319	0.1
ENSG00000186468.12	RPS23	chr5_81991013_G_A_b38	rs75679752	9.6e-05	0.16	Adipose - Visceral (Omentum)	G	A	0.0410205	0.094182	0.1
ENSG00000186468.12	RPS23	chr5_82098714_A_G_b38	rs113504626	9.9e-05	0.42	Adipose - Visceral (Omentum)	A	G	0.107885	0.00637	0.1
ENSG00000008988.9	RPS20	chr8_55945073_C_T_b38	rs79594160	4.8e-08	-0.31	Adipose - Visceral (Omentum)	C	T	0.0567915	0.022607	0.1
ENSG00000008988.9	RPS20	chr8_56105016_G_A_b38	rs528010151	6.4e-08	-0.53	Adipose - Visceral (Omentum)	G	A	0.0980166	0.00928	0.1
ENSG00000008988.9	RPS20	chr8_55281551_G_A_b38	rs17345965	9.9e-06	0.33	Adipose - Visceral (Omentum)	G	A	0.0746717	0.018953	0.1
ENSG00000105372.6	RPS19	chr19_41928397_G_C_b38	rs35009020	7.7e-07	0.11	Adipose - Visceral (Omentum)	G	C	0.0222545	0.320794	0.1
ENSG00000231500.6	RPS18	chr6_33272092_C_T_b38	rs17215231	2.1e-80	-0.72	Adipose - Visceral (Omentum)	C	T	0.0379165	0.052042	0.1
ENSG00000231500.6	RPS18	chr6_33118671_G_A_b38	rs1883414	1.6e-10	-0.19	Adipose - Visceral (Omentum)	G	A	0.0297083	0.270755	0.1
ENSG00000231500.6	RPS18	chr6_33651778_G_A_b38	rs79592126	2.5e-10	-0.58	Adipose - Visceral (Omentum)	G	A	0.0916709	0.01517	0.1
ENSG00000231500.6	RPS18	chr6_33284338_G_A_b38	rs455567	7.2e-10	0.16	Adipose - Visceral (Omentum)	G	A	0.0259672	0.414612	0.1
ENSG00000231500.6	RPS18	chr6_33804091_G_A_b38	rs72896138	1.3e-09	-0.5	Adipose - Visceral (Omentum)	G	A	0.0824077	0.01689	0.1
ENSG00000231500.6	RPS18	chr6_33766464_G_C_b38	rs145044106	7e-07	-0.48	Adipose - Visceral (Omentum)	G	C	0.0967476	0.008986	0.1
ENSG00000231500.6	RPS18	chr6_33551223_C_T_b38	rs210157	1.8e-06	-0.13	Adipose - Visceral (Omentum)	C	T	0.027227	0.391636	0.1
ENSG00000231500.6	RPS18	chr6_33773512_A_G_b38	rs6904716	1.1e-05	-0.11	Adipose - Visceral (Omentum)	A	G	0.0250198	0.448657	0.1
ENSG00000231500.6	RPS18	chr6_33131812_T_C_b38	rs3116988	2.2e-05	0.11	Adipose - Visceral (Omentum)	T	C	0.0259216	0.49052	0.1
ENSG00000231500.6	RPS18	chr6_33159361_C_A_b38	rs9277925	5e-05	-0.11	Adipose - Visceral (Omentum)	C	A	0.0271228	0.313171	0.1
ENSG00000182774.10	RPS17	chr15_82550590_G_A_b38	rs803686	5.5e-22	-0.17	Adipose - Visceral (Omentum)	G	A	0.0176376	0.260888	0.1
ENSG00000182774.10	RPS17	chr15_82630452_A_C_b38	rs72751675	3.2e-07	0.1	Adipose - Visceral (Omentum)	A	C	0.0195646	0.081669	0.1
ENSG00000182774.10	RPS17	chr15_82140282_C_T_b38	rs62011974	6.1e-06	-0.17	Adipose - Visceral (Omentum)	C	T	0.0375866	0.03207	0.1
ENSG00000182774.10	RPS17	chr15_82743132_G_A_b38	rs147068300	1.2e-05	0.17	Adipose - Visceral (Omentum)	G	A	0.0388342	0.028467	0.1
ENSG00000182774.10	RPS17	chr15_82866433_A_C_b38	rs117872319	6.5e-05	-0.17	Adipose - Visceral (Omentum)	A	C	0.0425651	0.03249	0.1
ENSG00000182774.10	RPS17	chr15_82945706_G_C_b38	rs11259961	8.4e-05	-0.15	Adipose - Visceral (Omentum)	G	C	0.0381418	0.034443	0.1
ENSG00000164587.11	RPS14	chr5_150436487_A_T_b38	rs2748244	9.4e-14	-0.16	Adipose - Visceral (Omentum)	A	T	0.0214792	0.457577	0.1
ENSG00000164587.11	RPS14	chr5_150416598_G_A_b38	rs1560663	2.2e-05	-0.082	Adipose - Visceral (Omentum)	G	A	0.0193234	0.409347	0.1
ENSG00000110700.6	RPS13	chr11_17094129_T_C_b38	rs16933829	4.3e-42	0.6	Adipose - Visceral (Omentum)	T	C	0.0441346	0.057219	0.1
ENSG00000110700.6	RPS13	chr11_17078066_G_A_b38	rs16933823	2.2e-09	0.14	Adipose - Visceral (Omentum)	G	A	0.0234023	0.1933	0.1
ENSG00000110700.6	RPS13	chr11_17346834_T_A_b38	rs7484027	7.1e-06	0.09	Adipose - Visceral (Omentum)	T	A	0.0200416	0.457344	0.1
ENSG00000110700.6	RPS13	chr11_17430478_T_A_b38	rs111501007	3.4e-05	0.22	Adipose - Visceral (Omentum)	T	A	0.0530776	0.042964	0.1
ENSG00000110700.6	RPS13	chr11_17359381_C_T_b38	rs2214285	9.1e-05	0.14	Adipose - Visceral (Omentum)	C	T	0.0357744	0.161458	0.1
ENSG00000142534.6	RPS11	chr19_49496390_C_G_b38	rs17555056	7.5e-25	-0.29	Adipose - Visceral (Omentum)	C	G	0.0281718	0.204714	0.1
ENSG00000142534.6	RPS11	chr19_49543216_A_C_b38	rs1129460	3.9e-06	-0.15	Adipose - Visceral (Omentum)	A	C	0.0324912	0.098977	0.1
ENSG00000142534.6	RPS11	chr19_49661133_T_C_b38	rs10415576	1.2e-05	-0.088	Adipose - Visceral (Omentum)	T	C	0.0201024	0.498882	0.1
ENSG00000124614.13	RPS10	chr6_34414160_A_G_b38	rs6925243	8.7e-14	0.21	Adipose - Visceral (Omentum)	A	G	0.0281529	0.221424	0.1
ENSG00000124614.13	RPS10	chr6_34426089_G_A_b38	rs78454682	1.5e-06	-0.13	Adipose - Visceral (Omentum)	G	A	0.0270201	0.092104	0.1
ENSG00000124614.13	RPS10	chr6_34102857_C_A_b38	rs6936419	0.00014	-0.066	Adipose - Visceral (Omentum)	C	A	0.0173312	0.377537	0.1
ENSG00000170889.13	RPS9	chr19_54200892_A_C_b38	rs3810232	1.3e-45	-0.32	Adipose - Visceral (Omentum)	A	C	0.0225742	0.297459	0.1
ENSG00000170889.13	RPS9	chr19_54217027_A_G_b38	rs3745410	8.2e-13	-0.35	Adipose - Visceral (Omentum)	A	G	0.0488979	0.057161	0.1
ENSG00000170889.13	RPS9	chr19_54214735_C_G_b38	rs11673607	3e-12	0.21	Adipose - Visceral (Omentum)	C	G	0.0300958	0.8596	0.1
ENSG00000170889.13	RPS9	chr19_54229765_G_C_b38	rs57317131	2e-09	-0.16	Adipose - Visceral (Omentum)	G	C	0.0266764	0.32294	0.1
ENSG00000170889.13	RPS9	chr19_54220517_A_G_b38	rs201534767	1.1e-07	-0.22	Adipose - Visceral (Omentum)	A	G	0.0414361	0.060311	0.1
ENSG00000170889.13	RPS9	chr19_54196040_T_G_b38	rs12982153	9.6e-07	0.16	Adipose - Visceral (Omentum)	T	G	0.0326553	0.154	0.1
ENSG00000170889.13	RPS9	chr19_54252794_T_C_b38	rs434755	5.9e-06	0.11	Adipose - Visceral (Omentum)	T	C	0.0242829	0.7132	0.1
ENSG00000170889.13	RPS9	chr19_54230970_G_T_b38	rs17841903	1.9e-05	-0.12	Adipose - Visceral (Omentum)	G	T	0.0280614	0.29541	0.1
ENSG00000170889.13	RPS9	chr19_54215528_A_T_b38	rs116878368	2.2e-05	0.25	Adipose - Visceral (Omentum)	A	T	0.0589128	0.032002	0.1
ENSG00000170889.13	RPS9	chr19_54246774_A_G_b38	rs606851	2.7e-05	0.11	Adipose - Visceral (Omentum)	A	G	0.0262067	0.294	0.1
ENSG00000142937.11	RPS8	chr1_44743989_A_G_b38	rs16832210	5.8e-23	-0.22	Adipose - Visceral (Omentum)	A	G	0.0222971	0.10612	0.1
ENSG00000142937.11	RPS8	chr1_44604863_G_A_b38	rs111921744	3.7e-08	-0.19	Adipose - Visceral (Omentum)	G	A	0.0345166	0.035357	0.1
ENSG00000142937.11	RPS8	chr1_45547090_G_A_b38	rs77657644	3e-06	-0.16	Adipose - Visceral (Omentum)	G	A	0.0342552	0.049595	0.1
ENSG00000142937.11	RPS8	chr1_44720384_G_A_b38	rs2983715	5.1e-06	0.081	Adipose - Visceral (Omentum)	G	A	0.0177607	0.272457	0.1
ENSG00000142937.11	RPS8	chr1_45757414_G_A_b38	rs11211176	7.2e-06	0.069	Adipose - Visceral (Omentum)	G	A	0.0153754	0.492205	0.1
ENSG00000142937.11	RPS8	chr1_44711399_G_A_b38	rs77796932	0.00011	0.18	Adipose - Visceral (Omentum)	G	A	0.0465428	0.015094	0.1
ENSG00000142937.11	RPS8	chr1_44701011_C_T_b38	rs76132381	0.00013	-0.21	Adipose - Visceral (Omentum)	C	T	0.054881	0.009748	0.1
ENSG00000171863.12	RPS7	chr2_3576461_C_A_b38	rs62106034	8.2e-10	-0.25	Adipose - Visceral (Omentum)	C	A	0.0407099	0.059305	0.1
ENSG00000171863.12	RPS7	chr2_3607194_G_C_b38	rs12618238	3.6e-05	-0.088	Adipose - Visceral (Omentum)	G	C	0.0212984	0.293478	0.1
ENSG00000171863.12	RPS7	chr2_3597420_G_A_b38	rs11678235	3.6e-05	0.12	Adipose - Visceral (Omentum)	G	A	0.0290433	0.09594	0.1
ENSG00000137154.12	RPS6	chr9_19357814_G_C_b38	rs12351518	4.5e-09	-0.16	Adipose - Visceral (Omentum)	G	C	0.027282	0.205355	0.1
ENSG00000137154.12	RPS6	chr9_19380241_A_T_b38	rs41270113	6.7e-07	0.21	Adipose - Visceral (Omentum)	A	T	0.0422547	0.061308	0.1
ENSG00000083845.8	RPS5	chr19_58387069_T_C_b38	rs731835	1.5e-25	-0.18	Adipose - Visceral (Omentum)	T	C	0.0172285	0.33096	0.1
ENSG00000083845.8	RPS5	chr19_58375064_C_T_b38	rs11669305	1.1e-06	0.11	Adipose - Visceral (Omentum)	C	T	0.0225741	0.153121	0.1
ENSG00000083845.8	RPS5	chr19_58405531_T_C_b38	rs7248357	7.2e-06	0.085	Adipose - Visceral (Omentum)	T	C	0.0189407	0.4183	0.1
ENSG00000083845.8	RPS5	chr19_58408447_C_T_b38	rs74831398	2.8e-05	-0.23	Adipose - Visceral (Omentum)	C	T	0.0549037	0.006989	0.1
ENSG00000083845.8	RPS5	chr19_58556256_C_T_b38	rs2305119	0.00016	0.078	Adipose - Visceral (Omentum)	C	T	0.0206622	0.328121	0.1
ENSG00000145425.9	RPS3A	chr4_151126213_C_T_b38	rs28593016	4.7e-11	-0.27	Adipose - Visceral (Omentum)	C	T	0.0410326	0.172125	0.1
ENSG00000140988.15	RPS2	chr16_1964282_A_G_b38	rs2286466	4.3e-11	-0.14	Adipose - Visceral (Omentum)	A	G	0.0212335	0.126148	0.1
ENSG00000140988.15	RPS2	chr16_1957885_C_T_b38	rs338786	1.2e-09	0.17	Adipose - Visceral (Omentum)	C	T	0.0279594	0.098091	0.1
ENSG00000140988.15	RPS2	chr16_1973371_A_C_b38	rs1860236	8.2e-07	-0.11	Adipose - Visceral (Omentum)	A	C	0.0223099	0.244209	0.1
ENSG00000140988.15	RPS2	chr16_1960614_C_G_b38	rs74391990	4e-05	-0.17	Adipose - Visceral (Omentum)	C	G	0.0413879	0.045145	0.1
ENSG00000146223.14	RPL7L1	chr6_42881785_A_T_b38	rs9471939	8.2e-11	-0.14	Adipose - Visceral (Omentum)	A	T	0.0693551	0.204478	0.1
ENSG00000161016.17	RPL8	chr8_144792397_C_T_b38	rs2954658	3.3e-64	-0.3	Adipose - Visceral (Omentum)	C	T	0.0177323	0.422902	0.1
ENSG00000161016.17	RPL8	chr8_144911030_C_G_b38	rs71522403	3.5e-11	0.2	Adipose - Visceral (Omentum)	C	G	0.030194	0.086265	0.1
ENSG00000161016.17	RPL8	chr8_144630636_A_G_b38	rs4925813	2.4e-08	-0.12	Adipose - Visceral (Omentum)	A	G	0.0215039	0.298591	0.1
ENSG00000161016.17	RPL8	chr8_144893834_C_T_b38	rs12542335	4.1e-07	0.2	Adipose - Visceral (Omentum)	C	T	0.0394925	0.078377	0.1
ENSG00000161016.17	RPL8	chr8_144854735_A_G_b38	rs72699315	2e-06	-0.16	Adipose - Visceral (Omentum)	A	G	0.0336599	0.068173	0.1
ENSG00000161016.17	RPL8	chr8_144791484_T_C_b38	rs11539893	2e-06	0.28	Adipose - Visceral (Omentum)	T	C	0.0589049	0.022272	0.1
ENSG00000161016.17	RPL8	chr8_144937058_T_G_b38	rs55836769	2.4e-06	-0.15	Adipose - Visceral (Omentum)	T	G	0.0318036	0.099463	0.1
ENSG00000161016.17	RPL8	chr8_144731628_C_T_b38	rs113217276	2.7e-06	-0.2	Adipose - Visceral (Omentum)	C	T	0.042622	0.056504	0.1
ENSG00000161016.17	RPL8	chr8_144717140_G_A_b38	rs4330728	4.5e-05	-0.083	Adipose - Visceral (Omentum)	G	A	0.0203422	0.382275	0.1
ENSG00000161016.17	RPL8	chr8_145021880_C_A_b38	rs71522414	0.00011	-0.1	Adipose - Visceral (Omentum)	C	A	0.0258571	0.2456	0.1
ENSG00000161016.17	RPL8	chr8_144732615_A_G_b38	rs4925840	0.00012	0.081	Adipose - Visceral (Omentum)	A	G	0.0210602	0.262181	0.1
ENSG00000163682.15	RPL9	chr4_39448204_G_A_b38	rs2687967	1.1e-153	-0.8	Adipose - Visceral (Omentum)	G	A	0.0302935	0.351855	0.1
ENSG00000163682.15	RPL9	chr4_39546862_C_T_b38	rs2608822	3.6e-12	-0.55	Adipose - Visceral (Omentum)	C	T	0.0791133	0.096846	0.1
ENSG00000163682.15	RPL9	chr4_39487069_C_T_b38	rs13112045	2.5e-10	-0.35	Adipose - Visceral (Omentum)	C	T	0.0553186	0.12394	0.1
ENSG00000163682.15	RPL9	chr4_39493233_G_A_b38	rs58971671	2.8e-08	0.47	Adipose - Visceral (Omentum)	G	A	0.0846313	0.122632	0.1
ENSG00000163682.15	RPL9	chr4_39493877_C_T_b38	rs145323240	3.8e-08	0.57	Adipose - Visceral (Omentum)	C	T	0.103638	0.032991	0.1
ENSG00000163682.15	RPL9	chr4_39642056_A_G_b38	rs13150827	3.9e-08	-0.23	Adipose - Visceral (Omentum)	A	G	0.0418538	0.41151	0.1
ENSG00000163682.15	RPL9	chr4_39487814_A_G_b38	rs2608841	6e-08	-0.32	Adipose - Visceral (Omentum)	A	G	0.0590537	0.136599	0.1
ENSG00000163682.15	RPL9	chr4_39585457_C_T_b38	rs186655261	3.1e-07	0.53	Adipose - Visceral (Omentum)	C	T	0.103571	0.04808	0.1
ENSG00000163682.15	RPL9	chr4_39241688_C_T_b38	rs113423134	3.3e-06	0.27	Adipose - Visceral (Omentum)	C	T	0.0580495	0.143466	0.1
ENSG00000163682.15	RPL9	chr4_39426342_G_A_b38	rs116585983	7.3e-06	0.61	Adipose - Visceral (Omentum)	G	A	0.136017	0.0145	0.1
ENSG00000163682.15	RPL9	chr4_38549583_T_C_b38	rs75331044	1.4e-05	0.26	Adipose - Visceral (Omentum)	T	C	0.0598546	0.096412	0.1
ENSG00000163682.15	RPL9	chr4_39502303_C_G_b38	rs77102251	1.9e-05	-0.48	Adipose - Visceral (Omentum)	C	G	0.112246	0.044661	0.1
ENSG00000163682.15	RPL9	chr4_39587825_T_G_b38	rs73240613	2.2e-05	0.44	Adipose - Visceral (Omentum)	T	G	0.103686	0.020772	0.1
ENSG00000163682.15	RPL9	chr4_39384201_C_A_b38	rs6823497	3e-05	-0.17	Adipose - Visceral (Omentum)	C	A	0.0407335	0.486621	0.1
ENSG00000163682.15	RPL9	chr4_38713430_A_G_b38	rs77352494	4.3e-05	0.24	Adipose - Visceral (Omentum)	A	G	0.0586691	0.117393	0.1
ENSG00000163682.15	RPL9	chr4_39605886_A_G_b38	rs10009783	4.4e-05	0.22	Adipose - Visceral (Omentum)	A	G	0.0538502	0.207846	0.1
ENSG00000198755.10	RPL10A	chr6_35469148_C_T_b38	rs2076172	1.6e-34	-0.23	Adipose - Visceral (Omentum)	C	T	0.0187695	0.439082	0.1
ENSG00000198755.10	RPL10A	chr6_35469145_C_T_b38	rs11553984	1.4e-15	-0.52	Adipose - Visceral (Omentum)	C	T	0.0651184	0.025239	0.1
ENSG00000198755.10	RPL10A	chr6_35302436_G_A_b38	rs10947541	2.8e-05	0.24	Adipose - Visceral (Omentum)	G	A	0.0572908	0.024408	0.1
ENSG00000198755.10	RPL10A	chr6_35797399_C_G_b38	rs142027015	0.00016	-0.3	Adipose - Visceral (Omentum)	C	G	0.0794699	0.018	0.1
ENSG00000198755.10	RPL10A	chr6_35377791_G_A_b38	rs76690650	0.00018	0.2	Adipose - Visceral (Omentum)	G	A	0.0533967	0.032726	0.1
ENSG00000197958.12	RPL12	chr9_127450597_T_A_b38	rs2247322	2.8e-69	0.33	Adipose - Visceral (Omentum)	T	A	0.0187577	0.378386	0.1
ENSG00000197958.12	RPL12	chr9_127503966_A_G_b38	rs3935304	3.8e-19	0.32	Adipose - Visceral (Omentum)	A	G	0.0357836	0.144612	0.1
ENSG00000197958.12	RPL12	chr9_127192582_G_A_b38	rs7040019	2.6e-10	0.15	Adipose - Visceral (Omentum)	G	A	0.0237307	0.49654	0.1
ENSG00000197958.12	RPL12	chr9_127520845_C_T_b38	rs71497661	7.7e-08	-0.18	Adipose - Visceral (Omentum)	C	T	0.0334945	0.077107	0.1
ENSG00000197958.12	RPL12	chr9_127726890_G_A_b38	rs148412578	2.6e-07	0.4	Adipose - Visceral (Omentum)	G	A	0.0776646	0.013202	0.1
ENSG00000197958.12	RPL12	chr9_127191737_A_G_b38	rs7035698	5.4e-06	0.16	Adipose - Visceral (Omentum)	A	G	0.0351755	0.113164	0.1
ENSG00000197958.12	RPL12	chr9_127549125_A_C_b38	rs2257055	6.7e-06	0.1	Adipose - Visceral (Omentum)	A	C	0.0222074	0.388318	0.1
ENSG00000197958.12	RPL12	chr9_126858257_C_T_b38	rs10760461	1.5e-05	-0.11	Adipose - Visceral (Omentum)	C	T	0.0254119	0.476837	0.1
ENSG00000197958.12	RPL12	chr9_127732512_C_T_b38	rs536262	1.7e-05	-0.15	Adipose - Visceral (Omentum)	C	T	0.0348753	0.168498	0.1
ENSG00000197958.12	RPL12	chr9_127456670_C_T_b38	rs192132096	6.1e-05	-0.28	Adipose - Visceral (Omentum)	C	T	0.0698444	0.010311	0.1
ENSG00000167526.13	RPL13	chr16_89553740_A_G_b38	rs730264	4.5e-24	-0.25	Adipose - Visceral (Omentum)	A	G	0.0247033	0.191682	0.1
ENSG00000167526.13	RPL13	chr16_89552122_G_A_b38	rs4785577	5.8e-05	0.099	Adipose - Visceral (Omentum)	G	A	0.0246219	0.207788	0.1
ENSG00000167526.13	RPL13	chr16_89119730_A_G_b38	rs11860237	8e-05	0.092	Adipose - Visceral (Omentum)	A	G	0.0233242	0.308506	0.1
ENSG00000167526.13	RPL13	chr16_89562551_C_T_b38	rs78016521	8.4e-05	-0.3	Adipose - Visceral (Omentum)	C	T	0.0762836	0.011372	0.1
ENSG00000188846.13	RPL14	chr3_40454403_T_C_b38	rs13089215	8.2e-08	-0.11	Adipose - Visceral (Omentum)	T	C	0.0205122	0.456131	0.1
ENSG00000188846.13	RPL14	chr3_40553553_G_A_b38	rs145633132	6.8e-06	-0.33	Adipose - Visceral (Omentum)	G	A	0.0733357	0.007512	0.1
ENSG00000188846.13	RPL14	chr3_40077125_G_A_b38	rs4337589	1.5e-05	-0.088	Adipose - Visceral (Omentum)	G	A	0.0203295	0.418202	0.1
ENSG00000188846.13	RPL14	chr3_40181937_T_C_b38	rs35373018	7.8e-05	-0.13	Adipose - Visceral (Omentum)	T	C	0.0329075	0.058951	0.1
ENSG00000063177.12	RPL18	chr19_49052698_A_G_b38	rs141934430	5.8e-05	-0.31	Adipose - Visceral (Omentum)	A	G	0.077099	0.024882	0.1
ENSG00000105640.12	RPL18A	chr19_17862080_C_T_b38	rs10422405	4.8e-15	-0.4	Adipose - Visceral (Omentum)	C	T	0.0510722	0.066639	0.1
ENSG00000108298.9	RPL19	chr17_39413468_G_A_b38	rs117608214	0.0001	-0.17	Adipose - Visceral (Omentum)	G	A	0.0436952	0.018235	0.1
ENSG00000037241.7	RPL26L1	chr5_172822991_A_G_b38	rs2879532	1.3e-05	-0.13	Adipose - Visceral (Omentum)	A	G	0.0298158	0.453924	0.1
ENSG00000037241.7	RPL26L1	chr5_173211150_C_A_b38	rs150636280	1.6e-05	0.49	Adipose - Visceral (Omentum)	C	A	0.113572	0.011146	0.1
ENSG00000166441.12	RPL27A	chr11_8683981_C_G_b38	rs61875926	3.1e-08	-0.15	Adipose - Visceral (Omentum)	C	G	0.0270969	0.08157	0.1
ENSG00000166441.12	RPL27A	chr11_7985238_A_G_b38	rs72847445	8.1e-05	-0.29	Adipose - Visceral (Omentum)	A	G	0.0735775	0.020677	0.1
ENSG00000108107.14	RPL28	chr19_55385959_A_G_b38	rs17700376	1.9e-28	-0.21	Adipose - Visceral (Omentum)	A	G	0.0189825	0.296294	0.1
ENSG00000108107.14	RPL28	chr19_55365286_G_C_b38	rs4252561	1.8e-08	-0.11	Adipose - Visceral (Omentum)	G	C	0.0195375	0.263435	0.1
ENSG00000108107.14	RPL28	chr19_55408934_G_A_b38	rs76445127	2e-06	-0.26	Adipose - Visceral (Omentum)	G	A	0.0546974	0.0284	0.1
ENSG00000162244.10	RPL29	chr3_51993314_T_C_b38	rs323864	4.5e-15	-0.29	Adipose - Visceral (Omentum)	T	C	0.0369891	0.10675	0.1
ENSG00000162244.10	RPL29	chr3_51901703_A_G_b38	rs1948879	8.9e-08	0.1	Adipose - Visceral (Omentum)	A	G	0.0186991	0.336364	0.1
ENSG00000162244.10	RPL29	chr3_51928065_T_C_b38	rs323881	1.3e-07	-0.16	Adipose - Visceral (Omentum)	T	C	0.0303097	0.140567	0.1
ENSG00000162244.10	RPL29	chr3_52044767_C_G_b38	rs72964039	6.9e-06	-0.18	Adipose - Visceral (Omentum)	C	G	0.0400289	0.121195	0.1
ENSG00000162244.10	RPL29	chr3_52380096_C_T_b38	rs73072968	0.00017	-0.2	Adipose - Visceral (Omentum)	C	T	0.0531933	0.015316	0.1
ENSG00000130255.12	RPL36	chr19_5552673_G_A_b38	rs4807781	1.1e-08	-0.4	Adipose - Visceral (Omentum)	G	A	0.0699969	0.01866	0.1
ENSG00000130255.12	RPL36	chr19_5691520_C_T_b38	rs45583031	5e-07	0.19	Adipose - Visceral (Omentum)	C	T	0.0378011	0.04566	0.1
ENSG00000130255.12	RPL36	chr19_5798713_C_T_b38	rs151080330	4e-05	0.25	Adipose - Visceral (Omentum)	C	T	0.0608646	0.013076	0.1
ENSG00000165502.6	RPL36AL	chr14_49623885_A_G_b38	rs1957977	2.2e-83	0.55	Adipose - Visceral (Omentum)	A	G	0.0284296	0.307056	0.1
ENSG00000165502.6	RPL36AL	chr14_49591452_C_G_b38	rs12147930	1.4e-09	-0.55	Adipose - Visceral (Omentum)	C	G	0.0908268	0.019259	0.1
ENSG00000165502.6	RPL36AL	chr14_49680852_C_G_b38	rs45589231	2.2e-08	-0.47	Adipose - Visceral (Omentum)	C	G	0.0839962	0.024811	0.1
ENSG00000165502.6	RPL36AL	chr14_49772795_A_G_b38	rs6572611	5.8e-08	0.21	Adipose - Visceral (Omentum)	A	G	0.0387107	0.154254	0.1
ENSG00000165502.6	RPL36AL	chr14_49764797_T_C_b38	rs111428791	7.1e-08	-0.51	Adipose - Visceral (Omentum)	T	C	0.0946439	0.018646	0.1
ENSG00000165502.6	RPL36AL	chr14_49934247_A_G_b38	rs72680061	1.7e-07	0.19	Adipose - Visceral (Omentum)	A	G	0.0363326	0.152357	0.1
ENSG00000165502.6	RPL36AL	chr14_49490635_T_C_b38	rs12323544	2.8e-07	0.17	Adipose - Visceral (Omentum)	T	C	0.0330969	0.446052	0.1
ENSG00000165502.6	RPL36AL	chr14_49892843_G_A_b38	rs74711338	6.3e-07	0.17	Adipose - Visceral (Omentum)	G	A	0.0341243	0.236045	0.1
ENSG00000165502.6	RPL36AL	chr14_49370275_A_G_b38	rs2776479	2.5e-06	-0.15	Adipose - Visceral (Omentum)	A	G	0.0318598	0.384192	0.1
ENSG00000165502.6	RPL36AL	chr14_49982986_C_A_b38	rs6572634	8.7e-06	0.14	Adipose - Visceral (Omentum)	C	A	0.0314805	0.462776	0.1
ENSG00000165502.6	RPL36AL	chr14_49553976_C_T_b38	rs6572584	4.8e-05	0.42	Adipose - Visceral (Omentum)	C	T	0.103317	0.012423	0.1
ENSG00000165502.6	RPL36AL	chr14_50061976_A_G_b38	rs6572642	6.6e-05	-0.16	Adipose - Visceral (Omentum)	A	G	0.0400976	0.165104	0.1
ENSG00000089157.15	RPLP0	chr12_120164274_T_G_b38	rs2286049	6.6e-06	0.11	Adipose - Visceral (Omentum)	T	G	0.0244108	0.335663	0.1
ENSG00000177600.8	RPLP2	chr11_805302_G_A_b38	rs28710291	5.6e-11	0.1	Adipose - Visceral (Omentum)	G	A	0.0152578	0.324969	0.1
ENSG00000177600.8	RPLP2	chr11_720197_C_T_b38	rs3087546	1e-06	0.075	Adipose - Visceral (Omentum)	C	T	0.0153323	0.459597	0.1
ENSG00000177600.8	RPLP2	chr11_983664_G_T_b38	rs6421968	5.9e-05	0.072	Adipose - Visceral (Omentum)	G	T	0.0179248	0.332961	0.1
ENSG00000177600.8	RPLP2	chr11_863037_G_A_b38	rs112098193	6.4e-05	-0.19	Adipose - Visceral (Omentum)	G	A	0.047529	0.051956	0.1
ENSG00000100316.15	RPL3	chr22_39319603_C_T_b38	rs143897309	4.5e-07	-0.35	Adipose - Visceral (Omentum)	C	T	0.0693551	0.009937	0.1
ENSG00000100316.15	RPL3	chr22_39219116_A_G_b38	rs75279419	1.7e-05	-0.12	Adipose - Visceral (Omentum)	A	G	0.0279002	0.096215	0.1
ENSG00000100316.15	RPL3	chr22_39342420_A_C_b38	rs137682	8.4e-05	0.078	Adipose - Visceral (Omentum)	A	C	0.0198337	0.308266	0.1
ENSG00000140986.7	RPL3L	chr16_2237166_G_A_b38	rs144134171	4.1e-06	0.88	Adipose - Visceral (Omentum)	G	A	0.0693551	0.018036	0.1
ENSG00000221983.7	UBA52	chr19_18564175_A_G_b38	rs28451415	5.7e-35	-0.24	Adipose - Visceral (Omentum)	A	G	0.0194531	0.301689	0.1
ENSG00000221983.7	UBA52	chr19_18645481_C_G_b38	rs34071094	5.3e-08	-0.19	Adipose - Visceral (Omentum)	C	G	0.0349204	0.072955	0.1
ENSG00000221983.7	UBA52	chr19_18456379_A_G_b38	rs76184771	3.4e-05	0.12	Adipose - Visceral (Omentum)	A	G	0.0289514	0.154593	0.1
ENSG00000221983.7	UBA52	chr19_18584514_G_A_b38	rs76092567	3.7e-05	-0.13	Adipose - Visceral (Omentum)	G	A	0.0315117	0.092009	0.1
ENSG00000221983.7	UBA52	chr19_18809435_C_A_b38	rs6511006	4.1e-05	-0.086	Adipose - Visceral (Omentum)	C	A	0.0209666	0.266058	0.1
ENSG00000149273.14	RPS3	chr11_75398824_T_C_b38	rs3133186	2.6e-28	-0.35	Adipose - Visceral (Omentum)	T	C	0.0317182	0.071802	0.1
ENSG00000149273.14	RPS3	chr11_76399243_G_A_b38	rs61892856	6.9e-05	-0.31	Adipose - Visceral (Omentum)	G	A	0.0778952	0.009525	0.1
ENSG00000149273.14	RPS3	chr11_75321976_A_G_b38	rs113636971	0.00011	-0.13	Adipose - Visceral (Omentum)	A	G	0.0336143	0.076913	0.1
ENSG00000105193.8	RPS16	chr19_39436185_T_C_b38	rs651601	1.4e-11	0.096	Adipose - Visceral (Omentum)	T	C	0.0142056	0.454519	0.1
ENSG00000204628.11	RACK1	chr5_181237105_C_G_b38	rs2770995	6.5e-05	-0.14	Adipose - Visceral (Omentum)	C	G	0.0350536	0.151982	0.1
ENSG00000147403.16	RPL10	chrX_154400814_G_A_b38	rs4909,rs12012747	3.7e-30	-0.22	Adipose - Visceral (Omentum)	G	A	0.0192803	0.317095	0.1
ENSG00000142541.16	RPL13A	chr19_49485343_A_G_b38	rs182963208	7.6e-06	-0.28	Adipose - Visceral (Omentum)	A	G	0.0625537	0.029064	0.1
ENSG00000109475.16	RPL34	chr4_108595388_C_T_b38	rs28760069	4.5e-13	-0.96	Adipose - Visceral (Omentum)	C	T	0.132604	0.024652	0.1
Colon Transverse
Gencode	Gene	Variant.Id	SNP	PVal	beta	Tissue	other_allele	effect_allele	se	eaf	LDthreshold
ENSG00000149806.10	FAU	chr11_65121944_G_C_b38	rs769440	6.6e-07	0.096	Colon - Transverse	G	C	0.0193051	0.0193051	0.1
ENSG00000140988.15	RPS2	chr16_1960614_C_G_b38	rs74391990	3.3e-07	-0.28	Colon - Transverse	C	G	0.0548433	0.045145	0.1
ENSG00000149273.14	RPS3	chr11_75410143_G_T_b38	rs373711199	1.6e-12	-0.25	Colon - Transverse	G	T	0.035383	0.04688	0.1
ENSG00000149273.14	RPS3	chr11_75189296_C_T_b38	rs138940575	2.5e-05	-0.29	Colon - Transverse	C	T	0.0688052	0.007611	0.1
ENSG00000149273.14	RPS3	chr11_75951540_G_T_b38	rs140077969	6.5e-05	-0.4	Colon - Transverse	G	T	0.100153	0.013113	0.1
ENSG00000145425.9	RPS3A	chr4_151238476_T_C_b38	rs74664063	9.5e-11	-0.31	Colon - Transverse	T	C	0.0478787	0.099758	0.1
ENSG00000083845.8	RPS5	chr19_58387815_A_G_b38	rs734379	1.1e-24	-0.27	Colon - Transverse	A	G	0.0263233	0.433983	0.1
ENSG00000083845.8	RPS5	chr19_58530356_G_A_b38	rs7253433	2.6e-05	0.12	Colon - Transverse	G	A	0.0285311	0.382612	0.1
ENSG00000083845.8	RPS5	chr19_58516305_T_C_b38	rs74733770	0.00012	-0.34	Colon - Transverse	T	C	0.0884006	0.020501	0.1
ENSG00000137154.12	RPS6	chr9_19361450_G_A_b38	rs6475324	3.9e-14	-0.27	Colon - Transverse	G	A	0.035694	0.180992	0.1
ENSG00000137154.12	RPS6	chr9_19287709_C_T_b38	rs118065356	2.5e-09	0.37	Colon - Transverse	C	T	0.0620654	0.037927	0.1
ENSG00000137154.12	RPS6	chr9_19231645_C_T_b38	rs10123714	2.4e-05	0.11	Colon - Transverse	C	T	0.0260416	0.448057	0.1
ENSG00000171863.12	RPS7	chr2_3575322_G_T_b38	rs11558965	5.3e-10	-0.36	Colon - Transverse	G	T	0.0579714	0.051874	0.1
ENSG00000171863.12	RPS7	chr2_3534590_G_A_b38	rs75135474	1.4e-05	0.17	Colon - Transverse	G	A	0.0391357	0.086345	0.1
ENSG00000171863.12	RPS7	chr2_3270178_G_A_b38	rs150892557	5e-05	-0.53	Colon - Transverse	G	A	0.130683	0.007388	0.1
ENSG00000142937.11	RPS8	chr1_44743989_A_G_b38	rs16832210	9.3e-16	-0.3	Colon - Transverse	A	G	0.0373331	0.10612	0.1
ENSG00000142937.11	RPS8	chr1_44709415_T_G_b38	rs2093197	3.5e-06	0.12	Colon - Transverse	T	G	0.0258673	0.178514	0.1
ENSG00000170889.13	RPS9	chr19_54202060_T_C_b38	rs71365431	1.7e-34	-0.39	Colon - Transverse	T	C	0.0318392	0.299681	0.1
ENSG00000170889.13	RPS9	chr19_54208716_C_G_b38	rs3745409	8e-09	0.36	Colon - Transverse	C	G	0.0624084	0.066214	0.1
ENSG00000170889.13	RPS9	chr19_54219540_G_A_b38	rs117408808	3.1e-07	-0.44	Colon - Transverse	G	A	0.0859835	0.025067	0.1
ENSG00000170889.13	RPS9	chr19_54250521_T_G_b38	rs2361796	1.7e-06	-0.18	Colon - Transverse	T	G	0.0376084	0.256075	0.1
ENSG00000170889.13	RPS9	chr19_54219869_C_G_b38	rs255772	3.5e-06	0.22	Colon - Transverse	C	G	0.0474234	0.231723	0.1
ENSG00000170889.13	RPS9	chr19_54196040_T_G_b38	rs12982153	2.5e-05	0.18	Colon - Transverse	T	G	0.0427067	0.154	0.1
ENSG00000124614.13	RPS10	chr6_34372016_C_A_b38	rs62399909	2.7e-10	0.27	Colon - Transverse	C	A	0.0427547	0.220622	0.1
ENSG00000124614.13	RPS10	chr6_34085647_A_G_b38	rs1873249	7.8e-05	-0.11	Colon - Transverse	A	G	0.0278448	0.416129	0.1
ENSG00000124614.13	RPS10	chr6_34426089_G_A_b38	rs78454682	0.00011	-0.18	Colon - Transverse	G	A	0.0465428	0.092104	0.1
ENSG00000142534.6	RPS11	chr19_49487409_A_C_b38	rs2271953	1.2e-12	-0.25	Colon - Transverse	A	C	0.0351847	0.196767	0.1
ENSG00000110700.6	RPS13	chr11_17113185_A_G_b38	rs16933837	1.1e-19	0.49	Colon - Transverse	A	G	0.0539732	0.058219	0.1
ENSG00000110700.6	RPS13	chr11_17095259_G_A_b38	rs61879695	2.9e-05	0.12	Colon - Transverse	G	A	0.0287	0.205924	0.1
ENSG00000110700.6	RPS13	chr11_17382953_A_G_b38	rs11828705	2.9e-05	0.16	Colon - Transverse	A	G	0.0382667	0.162085	0.1
ENSG00000164587.11	RPS14	chr5_150447931_C_T_b38	rs2748241	2.2e-11	-0.2	Colon - Transverse	C	T	0.029886	0.455131	0.1
ENSG00000164587.11	RPS14	chr5_150619459_G_A_b38	rs79017989	2.2e-06	-0.34	Colon - Transverse	G	A	0.0718189	0.076747	0.1
ENSG00000105193.8	RPS16	chr19_39436185_T_C_b38	rs651601	2.7e-49	0.5	Colon - Transverse	T	C	0.0338781	0.454519	0.1
ENSG00000105193.8	RPS16	chr19_39548046_G_C_b38	rs73040091	9.8e-07	0.35	Colon - Transverse	G	C	0.0714926	0.063055	0.1
ENSG00000105193.8	RPS16	chr19_39573371_C_T_b38	rs145711688	1.9e-06	0.43	Colon - Transverse	C	T	0.0902645	0.046306	0.1
ENSG00000105193.8	RPS16	chr19_39131716_G_A_b38	rs111574545	2.4e-05	-0.64	Colon - Transverse	G	A	0.151515	0.024198	0.1
ENSG00000105193.8	RPS16	chr19_39476723_C_T_b38	rs73035457	7e-05	-0.2	Colon - Transverse	C	T	0.0502982	0.186467	0.1
ENSG00000182774.10	RPS17	chr15_82649451_T_C_b38	rs11631963	1.8e-13	0.16	Colon - Transverse	T	C	0.0217307	0.439662	0.1
ENSG00000182774.10	RPS17	chr15_82371941_G_C_b38	rs202209146	2.1e-06	-0.13	Colon - Transverse	G	C	0.0274056	0.462061	0.1
ENSG00000182774.10	RPS17	chr15_81671316_T_A_b38	rs8026792	8.6e-06	0.11	Colon - Transverse	T	A	0.0247209	0.26742	0.1
ENSG00000231500.6	RPS18	chr6_33272092_C_T_b38	rs17215231	3e-59	-0.76	Colon - Transverse	C	T	0.0468214	0.052042	0.1
ENSG00000231500.6	RPS18	chr6_33651778_G_A_b38	rs79592126	3.3e-11	-0.72	Colon - Transverse	G	A	0.108556	0.01517	0.1
ENSG00000231500.6	RPS18	chr6_33138470_G_C_b38	rs9277868	1.2e-10	-0.22	Colon - Transverse	G	C	0.034165	0.239318	0.1
ENSG00000231500.6	RPS18	chr6_33766464_G_C_b38	rs145044106	6.2e-10	-0.64	Colon - Transverse	G	C	0.103472	0.008986	0.1
ENSG00000231500.6	RPS18	chr6_33783345_G_C_b38	rs9394166	2.5e-08	0.18	Colon - Transverse	G	C	0.032297	0.367242	0.1
ENSG00000231500.6	RPS18	chr6_33378409_C_A_b38	rs2747479	8.8e-06	-0.14	Colon - Transverse	C	A	0.0314979	0.431704	0.1
ENSG00000231500.6	RPS18	chr6_33764212_T_C_b38	rs35366046	1e-05	-0.18	Colon - Transverse	T	C	0.04075	0.135531	0.1
ENSG00000231500.6	RPS18	chr6_33173476_T_G_b38	rs9277932	2.3e-05	-0.13	Colon - Transverse	T	G	0.0307069	0.354832	0.1
ENSG00000231500.6	RPS18	chr6_33187753_A_G_b38	rs72881290	6.3e-05	-0.52	Colon - Transverse	A	G	0.129958	0.015696	0.1
ENSG00000231500.6	RPS18	chr6_33551223_C_T_b38	rs210157	8.5e-05	-0.12	Colon - Transverse	C	T	0.0305355	0.391636	0.1
ENSG00000008988.9	RPS20	chr8_56105016_G_A_b38	rs528010151	1.4e-09	-0.56	Colon - Transverse	G	A	0.0924782	0.00928	0.1
ENSG00000008988.9	RPS20	chr8_55990454_T_C_b38	rs67769144	1.4e-05	0.1	Colon - Transverse	T	C	0.023021	0.149901	0.1
ENSG00000008988.9	RPS20	chr8_55945073_C_T_b38	rs79594160	3.7e-05	-0.2	Colon - Transverse	C	T	0.0484795	0.022607	0.1
ENSG00000186468.12	RPS23	chr5_82273474_A_C_b38	rs3738	3.7e-53	-0.48	Colon - Transverse	A	C	0.0312761	0.32623	0.1
ENSG00000186468.12	RPS23	chr5_82321277_C_T_b38	rs11743578	4.1e-14	0.4	Colon - Transverse	C	T	0.0529256	0.082268	0.1
ENSG00000186468.12	RPS23	chr5_81953018_G_A_b38	rs1384256	1.3e-09	0.21	Colon - Transverse	G	A	0.0346112	0.499423	0.1
ENSG00000186468.12	RPS23	chr5_82609884_C_T_b38	rs77745910	4.4e-06	-0.25	Colon - Transverse	C	T	0.054448	0.103382	0.1
ENSG00000186468.12	RPS23	chr5_82220954_C_T_b38	rs146436114	4.1e-05	-0.42	Colon - Transverse	C	T	0.102395	0.009071	0.1
ENSG00000138326.18	RPS24	chr10_78033930_C_T_b38	rs3740253	6.1e-15	0.2	Colon - Transverse	C	T	0.0256349	0.476134	0.1
ENSG00000138326.18	RPS24	chr10_78017252_C_T_b38	rs72642275	1.5e-08	-0.43	Colon - Transverse	C	T	0.0759508	0.041404	0.1
ENSG00000118181.10	RPS25	chr11_119024976_C_T_b38	rs8192696	2.8e-06	-0.11	Colon - Transverse	C	T	0.0234793	0.238367	0.1
ENSG00000197728.9	RPS26	chr12_56042145_C_G_b38	rs1131017	3.9e-168	-1.1	Colon - Transverse	C	G	0.0398004	0.444089	0.1
ENSG00000197728.9	RPS26	chr12_56116134_G_C_b38	rs144131441	6.2e-10	-0.79	Colon - Transverse	G	C	0.127723	0.049579	0.1
ENSG00000197728.9	RPS26	chr12_56131446_G_C_b38	rs73125289	5.2e-08	0.63	Colon - Transverse	G	C	0.115717	0.053353	0.1
ENSG00000197728.9	RPS26	chr12_56072344_T_G_b38	rs12831884	5.9e-07	0.69	Colon - Transverse	T	G	0.138153	0.044103	0.1
ENSG00000197728.9	RPS26	chr12_55971915_C_A_b38	rs2069414	1.4e-06	-0.71	Colon - Transverse	C	A	0.14715	0.041972	0.1
ENSG00000197728.9	RPS26	chr12_55877049_T_C_b38	rs7484392	2.2e-05	-0.61	Colon - Transverse	T	C	0.143747	0.048611	0.1
ENSG00000197728.9	RPS26	chr12_56214143_C_T_b38	rs4759218	2.2e-05	-0.48	Colon - Transverse	C	T	0.113113	0.210201	0.1
ENSG00000197728.9	RPS26	chr12_56382802_G_A_b38	rs11171821	2.8e-05	-0.39	Colon - Transverse	G	A	0.0930976	0.140566	0.1
ENSG00000197728.9	RPS26	chr12_55866386_C_G_b38	rs4417323	3.6e-05	0.33	Colon - Transverse	C	G	0.0798692	0.188984	0.1
ENSG00000197728.9	RPS26	chr12_55611082_T_A_b38	rs2371188	6.5e-05	0.34	Colon - Transverse	T	A	0.0851302	0.1411	0.1
ENSG00000197728.9	RPS26	chr12_56017922_G_A_b38	rs117396149	8.7e-05	0.66	Colon - Transverse	G	A	0.168185	0.026158	0.1
ENSG00000197728.9	RPS26	chr12_56001636_T_A_b38	rs773126	0.00011	0.25	Colon - Transverse	T	A	0.0646428	0.369721	0.1
ENSG00000197728.9	RPS26	chr12_56489894_G_A_b38	rs11171864	0.00012	-0.43	Colon - Transverse	G	A	0.111801	0.064444	0.1
ENSG00000233927.4	RPS28	chr19_8322323_G_A_b38	rs1057232	2e-45	-0.35	Colon - Transverse	G	A	0.0247434	0.41518	0.1
ENSG00000233927.4	RPS28	chr19_8343829_T_C_b38	rs113225496	3e-07	0.26	Colon - Transverse	T	C	0.0507471	0.089457	0.1
ENSG00000233927.4	RPS28	chr19_8335767_C_G_b38	rs11669559	2.2e-05	-0.16	Colon - Transverse	C	G	0.0377042	0.141111	0.1
ENSG00000168028.13	RPSA	chr3_39406572_G_A_b38	rs3772147	4.4e-32	-0.34	Colon - Transverse	G	A	0.0288382	0.183906	0.1
ENSG00000168028.13	RPSA	chr3_39388404_G_C_b38	rs116547500	2.2e-07	-0.41	Colon - Transverse	G	C	0.0791263	0.01699	0.1
ENSG00000168028.13	RPSA	chr3_39154961_A_G_b38	rs2063634	5.9e-05	0.13	Colon - Transverse	A	G	0.0323643	0.226721	0.1
ENSG00000168028.13	RPSA	chr3_39268778_T_C_b38	rs13088991	7.7e-05	0.11	Colon - Transverse	T	C	0.0278231	0.482232	0.1
ENSG00000168028.13	RPSA	chr3_39248202_A_G_b38	rs9839675	7.9e-05	-0.13	Colon - Transverse	A	G	0.032933	0.245842	0.1
ENSG00000122406.12	RPL5	chr1_92994531_G_A_b38	rs753391	5.8e-05	0.066	Colon - Transverse	G	A	0.0164146	0.492781	0.1
ENSG00000146223.14	RPL7L1	chr6_42872580_G_A_b38	rs9471935	2.2e-13	-0.23	Colon - Transverse	G	A	0.031352	0.173051	0.1
ENSG00000146223.14	RPL7L1	chr6_42990281_T_C_b38	rs9462861	2.7e-05	-0.33	Colon - Transverse	T	C	0.0786201	0.018388	0.1
ENSG00000146223.14	RPL7L1	chr6_42874603_G_C_b38	rs140685568	5.1e-05	0.2	Colon - Transverse	G	C	0.0493706	0.085877	0.1
ENSG00000146223.14	RPL7L1	chr6_42130148_C_T_b38	rs75797005	7.9e-05	0.19	Colon - Transverse	C	T	0.0481328	0.062954	0.1
ENSG00000161016.17	RPL8	chr8_144792397_C_T_b38	rs2954658	1.7e-27	-0.24	Colon - Transverse	C	T	0.0220901	0.422902	0.1
ENSG00000161016.17	RPL8	chr8_144854735_A_G_b38	rs72699315	0.00014	-0.17	Colon - Transverse	A	G	0.0446409	0.068173	0.1
ENSG00000163682.15	RPL9	chr4_39448204_G_A_b38	rs2687967	5.8e-110	-0.75	Colon - Transverse	G	A	0.0336628	0.351855	0.1
ENSG00000163682.15	RPL9	chr4_39455015_T_C_b38	rs10025155	2.2e-11	-0.35	Colon - Transverse	T	C	0.0523005	0.199151	0.1
ENSG00000163682.15	RPL9	chr4_39418727_C_T_b38	rs112275455	9.7e-10	0.48	Colon - Transverse	C	T	0.0785049	0.061072	0.1
ENSG00000163682.15	RPL9	chr4_39647258_G_C_b38	rs6531731	1.4e-07	-0.24	Colon - Transverse	G	C	0.0455819	0.362308	0.1
ENSG00000163682.15	RPL9	chr4_39474917_A_T_b38	rs112932537	1.5e-07	-0.31	Colon - Transverse	A	T	0.0590188	0.157269	0.1
ENSG00000163682.15	RPL9	chr4_39766780_C_T_b38	rs111709089	1.6e-07	0.56	Colon - Transverse	C	T	0.106857	0.05405	0.1
ENSG00000163682.15	RPL9	chr4_39452763_A_G_b38	rs115176625	1.7e-06	0.67	Colon - Transverse	A	G	0.139987	0.012389	0.1
ENSG00000163682.15	RPL9	chr4_39486320_G_A_b38	rs12639862	6.4e-06	0.45	Colon - Transverse	G	A	0.099718	0.113113	0.1
ENSG00000163682.15	RPL9	chr4_39306567_G_A_b38	rs2066789	3.2e-05	-0.18	Colon - Transverse	G	A	0.0432823	0.381728	0.1
ENSG00000163682.15	RPL9	chr4_39702513_C_G_b38	rs140913132	9.5e-05	0.92	Colon - Transverse	C	G	0.235715	0.00738	0.1
ENSG00000198755.10	RPL10A	chr6_35461005_G_A_b38	rs10947550	2.8e-18	-0.22	Colon - Transverse	G	A	0.0252315	0.431366	0.1
ENSG00000198755.10	RPL10A	chr6_35469145_C_T_b38	rs11553984	2.5e-09	-0.48	Colon - Transverse	C	T	0.0805172	0.025239	0.1
ENSG00000198755.10	RPL10A	chr6_35784009_C_T_b38	rs12526562	8.6e-06	-0.15	Colon - Transverse	C	T	0.0337103	0.047321	0.1
ENSG00000198755.10	RPL10A	chr6_35983575_A_G_b38	rs9462150	2.2e-05	0.11	Colon - Transverse	A	G	0.0259216	0.426424	0.1
ENSG00000198755.10	RPL10A	chr6_35260438_G_T_b38	rs9296144	2.9e-05	-0.13	Colon - Transverse	G	T	0.0310917	0.203688	0.1
ENSG00000197958.12	RPL12	chr9_127428531_T_A_b38	rs7033779	6.7e-44	0.36	Colon - Transverse	T	A	0.0259068	0.377313	0.1
ENSG00000197958.12	RPL12	chr9_127496818_A_T_b38	rs7856923	9e-19	0.38	Colon - Transverse	A	T	0.042953	0.144561	0.1
ENSG00000197958.12	RPL12	chr9_127584839_C_T_b38	rs147447230	2.2e-06	-0.21	Colon - Transverse	C	T	0.0443588	0.089972	0.1
ENSG00000197958.12	RPL12	chr9_127192582_G_A_b38	rs7040019	6.9e-06	0.14	Colon - Transverse	G	A	0.0311336	0.49654	0.1
ENSG00000197958.12	RPL12	chr9_126963870_T_G_b38	rs112060121	8.6e-06	0.48	Colon - Transverse	T	G	0.107873	0.013251	0.1
ENSG00000197958.12	RPL12	chr9_126884749_A_G_b38	rs571606	3.5e-05	-0.19	Colon - Transverse	A	G	0.0459134	0.094873	0.1
ENSG00000197958.12	RPL12	chr9_127549125_A_C_b38	rs2257055	5.6e-05	0.13	Colon - Transverse	A	C	0.0322656	0.388318	0.1
ENSG00000167526.13	RPL13	chr16_89561052_T_G_b38	rs2280370	8.5e-18	-0.29	Colon - Transverse	T	G	0.0337498	0.199482	0.1
ENSG00000167526.13	RPL13	chr16_89607861_G_A_b38	rs35198968	5.3e-05	-0.24	Colon - Transverse	G	A	0.0593767	0.051093	0.1
ENSG00000167526.13	RPL13	chr16_89463115_C_T_b38	rs369449674	8.4e-05	0.12	Colon - Transverse	C	T	0.0305135	0.48929	0.1
ENSG00000167526.13	RPL13	chr16_89579549_G_C_b38	rs7404644	9.1e-05	-0.16	Colon - Transverse	G	C	0.040885	0.175602	0.1
ENSG00000188846.13	RPL14	chr3_40454403_T_C_b38	rs13089215	4.2e-09	-0.15	Colon - Transverse	T	C	0.0255271	0.456131	0.1
ENSG00000188846.13	RPL14	chr3_40141852_G_A_b38	rs7634072	9.8e-06	-0.11	Colon - Transverse	G	A	0.0248782	0.248003	0.1
ENSG00000188846.13	RPL14	chr3_40442457_A_C_b38	rs6599104	1.2e-05	-0.42	Colon - Transverse	A	C	0.0959432	0.025881	0.1
ENSG00000188846.13	RPL14	chr3_40771486_T_C_b38	rs592275	1.4e-05	-0.19	Colon - Transverse	T	C	0.0437399	0.171713	0.1
ENSG00000188846.13	RPL14	chr3_39934863_G_A_b38	rs6810375	2.7e-05	0.17	Colon - Transverse	G	A	0.0405013	0.211366	0.1
ENSG00000188846.13	RPL14	chr3_40674505_G_T_b38	rs11716905	2.9e-05	-0.11	Colon - Transverse	G	T	0.0263084	0.222268	0.1
ENSG00000188846.13	RPL14	chr3_40455636_A_G_b38	rs9859185	3.6e-05	-0.29	Colon - Transverse	A	G	0.070188	0.05288	0.1
ENSG00000188846.13	RPL14	chr3_40128349_A_T_b38	rs6766779	0.00015	0.15	Colon - Transverse	A	T	0.0395667	0.157917	0.1
ENSG00000105640.12	RPL18A	chr19_17859585_A_G_b38	rs17523547	5.7e-11	-0.46	Colon - Transverse	A	G	0.070214	0.066432	0.1
ENSG00000105640.12	RPL18A	chr19_17857583_T_C_b38	rs111922843	1.8e-05	-0.16	Colon - Transverse	T	C	0.0373103	0.173277	0.1
ENSG00000166441.12	RPL27A	chr11_8683981_C_G_b38	rs61875926	5.9e-08	-0.24	Colon - Transverse	C	G	0.0442657	0.08157	0.1
ENSG00000166441.12	RPL27A	chr11_8264692_T_G_b38	rs185485211	1.5e-06	-0.6	Colon - Transverse	T	G	0.124708	0.009941	0.1
ENSG00000108107.14	RPL28	chr19_55385959_A_G_b38	rs17700376	2.8e-29	-0.31	Colon - Transverse	A	G	0.0275967	0.296294	0.1
ENSG00000108107.14	RPL28	chr19_55407759_C_A_b38	rs139976763	8e-06	-0.35	Colon - Transverse	C	A	0.0783842	0.011382	0.1
ENSG00000108107.14	RPL28	chr19_55373330_A_G_b38	rs117312206	1.1e-05	-0.23	Colon - Transverse	A	G	0.0523141	0.0443	0.1
ENSG00000108107.14	RPL28	chr19_55399953_C_T_b38	rs62128216	1.6e-05	0.24	Colon - Transverse	C	T	0.055627	0.05293	0.1
ENSG00000162244.10	RPL29	chr3_52005208_A_G_b38	rs57263506	7.7e-10	-0.3	Colon - Transverse	A	G	0.0487726	0.05293	0.1
ENSG00000144713.12	RPL32	chr3_11908807_T_C_b38	rs62246115	8.6e-06	0.08	Colon - Transverse	T	C	0.0179788	0.356368	0.1
ENSG00000144713.12	RPL32	chr3_12832841_G_A_b38	rs6442338	9.1e-06	0.12	Colon - Transverse	G	A	0.0270421	0.182668	0.1
ENSG00000144713.12	RPL32	chr3_13210617_G_C_b38	rs4684919	6.7e-05	0.082	Colon - Transverse	G	C	0.0205684	0.310388	0.1
ENSG00000130255.12	RPL36	chr19_5691520_C_T_b38	rs45583031	7.7e-08	0.26	Colon - Transverse	C	T	0.0483809	0.04566	0.1
ENSG00000130255.12	RPL36	chr19_5690011_A_G_b38	rs117650704	5.8e-07	-0.44	Colon - Transverse	A	G	0.0880394	0.02106	0.1
ENSG00000130255.12	RPL36	chr19_5950910_C_T_b38	rs77001608	4.5e-05	-0.35	Colon - Transverse	C	T	0.0857804	0.012868	0.1
ENSG00000165502.6	RPL36AL	chr14_49620639_C_G_b38	rs1952013	3.1e-44	0.51	Colon - Transverse	C	G	0.0365564	0.45647	0.1
ENSG00000165502.6	RPL36AL	chr14_49823935_G_C_b38	rs7160493	1.7e-07	-0.36	Colon - Transverse	G	C	0.0688407	0.079472	0.1
ENSG00000165502.6	RPL36AL	chr14_49772795_A_G_b38	rs6572611	3.4e-06	0.23	Colon - Transverse	A	G	0.0495151	0.154254	0.1
ENSG00000165502.6	RPL36AL	chr14_49553976_C_T_b38	rs6572584	1.8e-05	0.52	Colon - Transverse	C	T	0.121259	0.012423	0.1
ENSG00000165502.6	RPL36AL	chr14_49490635_T_C_b38	rs12323544	7.2e-05	0.16	Colon - Transverse	T	C	0.0403065	0.446052	0.1
ENSG00000165502.6	RPL36AL	chr14_49676761_A_G_b38	rs12433192	8.8e-05	0.18	Colon - Transverse	A	G	0.0459008	0.243174	0.1
ENSG00000197756.9	RPL37A	chr2_216495467_C_A_b38	rs149154981	1.2e-09	-0.48	Colon - Transverse	C	A	0.0789442	0.040156	0.1
ENSG00000089157.15	RPLP0	chr12_120140266_A_T_b38	rs2240315	2.5e-06	0.14	Colon - Transverse	A	T	0.0297358	0.225027	0.1
ENSG00000177600.8	RPLP2	chr11_802115_A_G_b38	rs7479101	5.7e-08	0.14	Colon - Transverse	A	G	0.0257924	0.321246	0.1
ENSG00000221983.7	UBA52	chr19_18556462_A_C_b38	rs8110371	1.6e-11	-0.18	Colon - Transverse	A	C	0.0267121	0.362936	0.1
ENSG00000221983.7	UBA52	chr19_17854159_G_A_b38	rs76086839	4.8e-06	0.34	Colon - Transverse	G	A	0.0743438	0.036823	0.1
ENSG00000204628.11	RACK1	chr5_181237105_C_G_b38	rs2770995	3.3e-07	-0.23	Colon - Transverse	C	G	0.0450499	0.151982	0.1
ENSG00000147403.16	RPL10	chrX_154356517_C_A_b38	rs2239469	1.3e-22	-0.3	Colon - Transverse	C	A	0.0306577	0.291062	0.1
ENSG00000063177.12	RPL18	chr19_48689229_A_G_b38	rs796463126	8.1e-07	-0.51	Colon - Transverse	A	G	0.103387	0.0004567	0.1
ENSG00000109475.16	RPL34	chr4_108595388_C_T_b38	rs28760069	1.6e-14	-1.1	Colon - Transverse	C	T	0.143243	0.024652	0.1
Pancreas
Gencode	Gene	Variant.Id	SNP	PVal	beta	Tissue	other_allele	effect_allele	se	eaf	LDthreshold
ENSG00000168028.13	RPSA	chr3_39406713_C_T_b38	rs3772146	4.3e-43	-0.44	Pancreas	C	T	0.0319715	0.280194	0.1
ENSG00000168028.13	RPSA	chr3_39281174_A_G_b38	rs938203	9.1e-10	0.29	Pancreas	A	G	0.0473512	0.147998	0.1
ENSG00000168028.13	RPSA	chr3_39181019_T_G_b38	rs114584454	1.4e-07	-0.23	Pancreas	T	G	0.0436827	0.192964	0.1
ENSG00000168028.13	RPSA	chr3_39282352_T_C_b38	rs13098237	1.1e-06	0.2	Pancreas	T	C	0.0410437	0.243496	0.1
ENSG00000168028.13	RPSA	chr3_39516280_G_A_b38	rs116640761	1.1e-05	-0.46	Pancreas	G	A	0.104628	0.012555	0.1
ENSG00000168028.13	RPSA	chr3_39505727_C_T_b38	rs13072532	2.5e-05	-0.33	Pancreas	C	T	0.0782955	0.056412	0.1
ENSG00000140988.15	RPS2	chr16_1964282_A_G_b38	rs2286466	1.1e-14	-0.29	Pancreas	A	G	0.0375301	0.126148	0.1
ENSG00000140988.15	RPS2	chr16_2059952_C_T_b38	rs12185167	1.2e-06	0.19	Pancreas	C	T	0.0391298	0.074681	0.1
ENSG00000140988.15	RPS2	chr16_2000676_T_G_b38	rs113703216	1.2e-05	-0.28	Pancreas	T	G	0.0639622	0.024561	0.1
ENSG00000149273.14	RPS3	chr11_75411651_A_G_b38	rs34503349	3.3e-21	-0.47	Pancreas	A	G	0.0497209	0.071228	0.1
ENSG00000149273.14	RPS3	chr11_75385940_T_C_b38	rs580077	1.7e-06	-0.15	Pancreas	T	C	0.0313403	0.477963	0.1
ENSG00000145425.9	RPS3A	chr4_151194128_C_T_b38	rs78296340	4.1e-06	-0.3	Pancreas	C	T	0.0651289	0.097426	0.1
ENSG00000171863.12	RPS7	chr2_3605689_C_T_b38	rs66718279	3.2e-07	-0.16	Pancreas	C	T	0.0313034	0.428731	0.1
ENSG00000142937.11	RPS8	chr1_44775613_C_G_b38	rs12120833	6.7e-14	-0.35	Pancreas	C	G	0.0467064	0.10548	0.1
ENSG00000142937.11	RPS8	chr1_44764177_C_A_b38	rs60766209	1.1e-06	0.17	Pancreas	C	A	0.0348872	0.201653	0.1
ENSG00000142937.11	RPS8	chr1_45537967_C_T_b38	rs141027594	3.6e-05	0.27	Pancreas	C	T	0.0653475	0.040669	0.1
ENSG00000170889.13	RPS9	chr19_54202044_C_G_b38	rs67627137	4.7e-13	-0.24	Pancreas	C	G	0.033178	0.291534	0.1
ENSG00000124614.13	RPS10	chr6_34372016_C_A_b38	rs62399909	3.4e-11	0.31	Pancreas	C	A	0.0467705	0.220622	0.1
ENSG00000124614.13	RPS10	chr6_34127142_A_G_b38	rs115675705	3.5e-05	0.32	Pancreas	A	G	0.0773278	0.022034	0.1
ENSG00000110700.6	RPS13	chr11_17106799_A_G_b38	rs80288693	2.1e-05	0.35	Pancreas	A	G	0.0822758	0.043703	0.1
ENSG00000164587.11	RPS14	chr5_150446963_C_T_b38	rs4841	3e-05	-0.17	Pancreas	C	T	0.0407335	0.264877	0.1
ENSG00000231500.6	RPS18	chr6_33272092_C_T_b38	rs17215231	1.2e-29	-0.64	Pancreas	C	T	0.0565979	0.052042	0.1
ENSG00000231500.6	RPS18	chr6_33769398_T_G_b38	rs79191137	2.9e-08	-0.45	Pancreas	T	G	0.0811195	0.026988	0.1
ENSG00000231500.6	RPS18	chr6_33766464_G_C_b38	rs145044106	2.1e-06	-0.57	Pancreas	G	C	0.120163	0.008986	0.1
ENSG00000231500.6	RPS18	chr6_33122050_A_G_b38	rs3130221	6.7e-06	-0.18	Pancreas	A	G	0.0399733	0.225585	0.1
ENSG00000231500.6	RPS18	chr6_33131298_G_A_b38	rs2294476	5.4e-05	0.22	Pancreas	G	A	0.0544878	0.130166	0.1
ENSG00000008988.9	RPS20	chr8_56017980_G_A_b38	rs2668014	7.3e-09	0.17	Pancreas	G	A	0.0293921	0.165196	0.1
ENSG00000008988.9	RPS20	chr8_56105016_G_A_b38	rs528010151	7.2e-05	-0.43	Pancreas	G	A	0.108324	0.00928	0.1
ENSG00000186468.12	RPS23	chr5_82273474_A_C_b38	rs3738	3.8e-30	-0.42	Pancreas	A	C	0.0368152	0.32623	0.1
ENSG00000186468.12	RPS23	chr5_82276077_A_G_b38	rs9099	7.6e-09	0.32	Pancreas	A	G	0.0553911	0.127821	0.1
ENSG00000186468.12	RPS23	chr5_81953018_G_A_b38	rs1384256	4e-06	0.19	Pancreas	G	A	0.0412024	0.499423	0.1
ENSG00000186468.12	RPS23	chr5_81933831_C_T_b38	rs184023977	7.2e-06	-0.58	Pancreas	C	T	0.129242	0.009616	0.1
ENSG00000138326.18	RPS24	chr10_78106915_C_T_b38	rs1863897	2.6e-09	0.19	Pancreas	C	T	0.0319057	0.493642	0.1
ENSG00000118181.10	RPS25	chr11_119008250_C_T_b38	rs111804650	6.7e-06	0.19	Pancreas	C	T	0.0421941	0.07426	0.1
ENSG00000197728.9	RPS26	chr12_56042145_C_G_b38	rs1131017	5.5e-156	-1.2	Pancreas	C	G	0.0450994	0.444089	0.1
ENSG00000197728.9	RPS26	chr12_56188408_G_A_b38	rs61939011	3.3e-08	0.95	Pancreas	G	A	0.171954	0.039273	0.1
ENSG00000197728.9	RPS26	chr12_56116134_G_C_b38	rs144131441	3.6e-07	-0.83	Pancreas	G	C	0.163098	0.049579	0.1
ENSG00000197728.9	RPS26	chr12_56017922_G_A_b38	rs117396149	3e-06	1.2	Pancreas	G	A	0.256914	0.026158	0.1
ENSG00000197728.9	RPS26	chr12_56189702_A_G_b38	rs11171773	3.8e-06	-0.61	Pancreas	A	G	0.131977	0.226101	0.1
ENSG00000197728.9	RPS26	chr12_56109343_G_C_b38	rs11171744	1.8e-05	-0.55	Pancreas	G	C	0.128254	0.092302	0.1
ENSG00000197728.9	RPS26	chr12_56024894_C_T_b38	rs71459332	2e-05	0.7	Pancreas	C	T	0.164131	0.043766	0.1
ENSG00000197728.9	RPS26	chr12_55667056_G_C_b38	rs149874092	5e-05	0.42	Pancreas	G	C	0.10356	0.127796	0.1
ENSG00000197728.9	RPS26	chr12_56020730_C_T_b38	rs75143485	0.00014	0.91	Pancreas	C	T	0.23896	0.022397	0.1
ENSG00000185088.13	RPS27L	chr15_63148316_A_C_b38	rs7169648	1.3e-07	-0.35	Pancreas	A	C	0.0663024	0.136401	0.1
ENSG00000185088.13	RPS27L	chr15_63278141_T_A_b38	rs11858705	1.4e-05	-0.18	Pancreas	T	A	0.0414378	0.346026	0.1
ENSG00000185088.13	RPS27L	chr15_63406254_C_T_b38	rs77616581	6.2e-05	1.1	Pancreas	C	T	0.274652	0.01033	0.1
ENSG00000185088.13	RPS27L	chr15_63480549_A_G_b38	rs12441911	6.5e-05	-0.16	Pancreas	A	G	0.0400613	0.315426	0.1
ENSG00000233927.4	RPS28	chr19_8322323_G_A_b38	rs1057232	3.3e-34	-0.43	Pancreas	G	A	0.03526	0.41518	0.1
ENSG00000233927.4	RPS28	chr19_8389639_A_G_b38	rs10421495	6.3e-07	-0.19	Pancreas	A	G	0.0381389	0.455109	0.1
ENSG00000140986.7	RPL3L	chr16_1954717_T_C_b38	rs2815301	4.8e-65	-1.2	Pancreas	T	C	0.0704579	0.150642	0.1
ENSG00000140986.7	RPL3L	chr16_1983428_G_A_b38	rs72766611	1.6e-08	-0.51	Pancreas	G	A	0.0902578	0.232912	0.1
ENSG00000140986.7	RPL3L	chr16_2059952_C_T_b38	rs12185167	7.2e-08	0.52	Pancreas	C	T	0.0965447	0.074681	0.1
ENSG00000140986.7	RPL3L	chr16_2022005_C_A_b38	rs77189484	1e-05	0.93	Pancreas	C	A	0.210542	0.019553	0.1
ENSG00000140986.7	RPL3L	chr16_1973371_A_C_b38	rs1860236	1.2e-05	-0.42	Pancreas	A	C	0.0959432	0.244209	0.1
ENSG00000140986.7	RPL3L	chr16_1501825_C_G_b38	rs72779276	2.3e-05	0.4	Pancreas	C	G	0.0944827	0.169496	0.1
ENSG00000140986.7	RPL3L	chr16_1504844_C_T_b38	rs116517010	2.4e-05	1.3	Pancreas	C	T	0.307765	0.005606	0.1
ENSG00000140986.7	RPL3L	chr16_1949058_A_G_b38	rs7198197	4.5e-05	-0.31	Pancreas	A	G	0.075977	0.378798	0.1
ENSG00000140986.7	RPL3L	chr16_2254398_A_G_b38	rs137863738	4.7e-05	0.96	Pancreas	A	G	0.235868	0.019391	0.1
ENSG00000146223.14	RPL7L1	chr6_42901470_A_G_b38	rs9471951	3.3e-11	-0.25	Pancreas	A	G	0.0376931	0.199023	0.1
ENSG00000161016.17	RPL8	chr8_144792397_C_T_b38	rs2954658	2.4e-29	-0.35	Pancreas	C	T	0.0311198	0.422902	0.1
ENSG00000161016.17	RPL8	chr8_144911030_C_G_b38	rs71522403	2.6e-06	0.24	Pancreas	C	G	0.0510625	0.086265	0.1
ENSG00000161016.17	RPL8	chr8_144478125_G_A_b38	rs11777703	2.9e-05	-0.15	Pancreas	G	A	0.035875	0.495267	0.1
ENSG00000161016.17	RPL8	chr8_144597248_C_T_b38	rs72697662	5.8e-05	-0.21	Pancreas	C	T	0.0522284	0.10014	0.1
ENSG00000163682.15	RPL9	chr4_39448204_G_A_b38	rs2687967	2.5e-89	-0.83	Pancreas	G	A	0.0414185	0.351855	0.1
ENSG00000163682.15	RPL9	chr4_39450670_C_T_b38	rs9995998	1.1e-06	-0.32	Pancreas	C	T	0.06567	0.19885	0.1
ENSG00000163682.15	RPL9	chr4_39492613_G_A_b38	rs73137481	2.7e-06	0.52	Pancreas	G	A	0.110817	0.12449	0.1
ENSG00000163682.15	RPL9	chr4_39580607_A_G_b38	rs11727177	3.2e-06	0.59	Pancreas	A	G	0.126676	0.053014	0.1
ENSG00000163682.15	RPL9	chr4_39502303_C_G_b38	rs77102251	3.4e-06	-0.64	Pancreas	C	G	0.137781	0.044661	0.1
ENSG00000163682.15	RPL9	chr4_39481299_G_A_b38	rs73238594	1.3e-05	-0.58	Pancreas	G	A	0.133024	0.034493	0.1
ENSG00000163682.15	RPL9	chr4_39426342_G_A_b38	rs116585983	5.8e-05	0.81	Pancreas	G	A	0.201452	0.0145	0.1
ENSG00000198755.10	RPL10A	chr6_35357279_T_C_b38	rs113775775	8.4e-11	-1	Pancreas	T	C	0.154006	0.012484	0.1
ENSG00000198755.10	RPL10A	chr6_35469148_C_T_b38	rs2076172	2.3e-08	-0.19	Pancreas	C	T	0.0340028	0.439082	0.1
ENSG00000198755.10	RPL10A	chr6_35489619_G_T_b38	rs7740758	5.8e-05	-0.16	Pancreas	G	T	0.039793	0.268118	0.1
ENSG00000197958.12	RPL12	chr9_127418944_C_G_b38	rs10987645	1.5e-21	0.3	Pancreas	C	G	0.0314633	0.375016	0.1
ENSG00000197958.12	RPL12	chr9_127459253_G_A_b38	rs7849608	4.3e-07	0.25	Pancreas	G	A	0.0494543	0.155253	0.1
ENSG00000167526.13	RPL13	chr16_89565590_A_C_b38	rs67723215	1.8e-12	-0.27	Pancreas	A	C	0.0383024	0.163248	0.1
ENSG00000167526.13	RPL13	chr16_89676675_G_A_b38	rs34057012	1e-05	0.13	Pancreas	G	A	0.0294306	0.38589	0.1
ENSG00000142541.16	RPL13A	chr19_49487208_G_A_b38	rs76687611	4.3e-08	0.31	Pancreas	G	A	0.0565893	0.046582	0.1
ENSG00000265681.7	RPL17	chr18_49156830_G_A_b38	rs144046116	5.9e-09	-0.78	Pancreas	G	A	0.134031	0.00514	0.1
ENSG00000105640.12	RPL18A	chr19_17864736_G_A_b38	rs8108030	3.3e-06	-0.4	Pancreas	G	A	0.0859992	0.061955	0.1
ENSG00000166441.12	RPL27A	chr11_9367145_C_T_b38	rs113235151	1.1e-05	-0.29	Pancreas	C	T	0.0659613	0.044072	0.1
ENSG00000108107.14	RPL28	chr19_55385959_A_G_b38	rs17700376	3.9e-53	-0.61	Pancreas	A	G	0.0397556	0.296294	0.1
ENSG00000108107.14	RPL28	chr19_55373330_A_G_b38	rs117312206	6.9e-09	-0.48	Pancreas	A	G	0.0828538	0.0443	0.1
ENSG00000108107.14	RPL28	chr19_55391151_G_C_b38	rs45572040	1.8e-06	-0.44	Pancreas	G	C	0.0921529	0.047256	0.1
ENSG00000108107.14	RPL28	chr19_55399953_C_T_b38	rs62128216	1.5e-05	0.36	Pancreas	C	T	0.0831661	0.05293	0.1
ENSG00000108107.14	RPL28	chr19_55742938_G_A_b38	rs184655294	1.5e-05	-0.64	Pancreas	G	A	0.147851	0.014333	0.1
ENSG00000071082.10	RPL31	chr2_100995589_G_A_b38	rs2305158	1.5e-08	-0.19	Pancreas	G	A	0.0335596	0.208549	0.1
ENSG00000109475.16	RPL34	chr4_108016677_C_T_b38	rs28450916	9.1e-05	-0.23	Pancreas	C	T	0.0587722	0.113183	0.1
ENSG00000165502.6	RPL36AL	chr14_49620639_C_G_b38	rs1952013	1.2e-43	0.49	Pancreas	C	G	0.0353684	0.45647	0.1
ENSG00000165502.6	RPL36AL	chr14_49823198_C_A_b38	rs12881290	3.5e-06	-0.31	Pancreas	C	A	0.0668239	0.079118	0.1
ENSG00000165502.6	RPL36AL	chr14_49856168_T_C_b38	rs78462005	7.1e-06	0.17	Pancreas	T	C	0.0378563	0.250352	0.1
ENSG00000165502.6	RPL36AL	chr14_49982986_C_A_b38	rs6572634	3.1e-05	0.15	Pancreas	C	A	0.0360058	0.462776	0.1
ENSG00000165502.6	RPL36AL	chr14_49591452_C_G_b38	rs12147930	4.2e-05	-0.49	Pancreas	C	G	0.119623	0.019259	0.1
ENSG00000165502.6	RPL36AL	chr14_49711326_C_T_b38	rs184240697	5.4e-05	-0.53	Pancreas	C	T	0.131266	0.017325	0.1
ENSG00000145592.13	RPL37	chr5_40770298_A_C_b38	rs193864	2.7e-05	-0.12	Pancreas	A	C	0.0285891	0.32298	0.1
ENSG00000145592.13	RPL37	chr5_40599828_G_A_b38	rs112110624	8.2e-05	0.34	Pancreas	G	A	0.0863278	0.01877	0.1
ENSG00000177600.8	RPLP2	chr11_788007_G_A_b38	rs6597982	8.3e-06	0.16	Pancreas	G	A	0.0358962	0.28902	0.1
ENSG00000221983.7	UBA52	chr19_18571685_A_C_b38	rs2283616	1e-14	-0.27	Pancreas	A	C	0.0348871	0.293223	0.1
ENSG00000221983.7	UBA52	chr19_18604344_G_A_b38	rs72995445	6.7e-05	0.3	Pancreas	G	A	0.0752503	0.040603	0.1
ENSG00000147403.16	RPL10	chrX_154400814_G_A_b38	rs4909,rs12012747	2.4e-14	-0.23	Pancreas	G	A	0.0301554	0.106086	0.1
ENSG00000204628.11	RACK1	chr5_180618388_CACCCTCTCCTGCTCCTCAGCCTCTGGGACACCCACGTCCTACTCCAGAGG_C_b38	rs1283528522	5.1e-07	-0.29	Pancreas	CACCCTCTCCTGCTCCTCAGCCTCTGGGACACCCACGTCCTACTCCAGAGG	C	0.05774	0.05774	0.1
Pituitary
Gencode	Gene	Variant.Id	SNP	PVal	beta	Tissue	other_allele	effect_allele	se	eaf	LDthreshold
ENSG00000149273.14	RPS3	chr11_75410143_G_T_b38	rs373711199	1.4e-12	-0.67	Pituitary	G	T	0.0945786	0.04688	0.1
ENSG00000149273.14	RPS3	chr11_75389915_A_G_b38	rs149291854	6.1e-06	-0.78	Pituitary	A	G	0.172456	0.013737	0.1
ENSG00000149273.14	RPS3	chr11_74552881_A_G_b38	rs1315223	3e-05	0.24	Pituitary	A	G	0.0575062	0.306332	0.1
ENSG00000083845.8	RPS5	chr19_58403352_C_T_b38	rs12608956	2.8e-05	-0.21	Pituitary	C	T	0.0501295	0.241257	0.1
ENSG00000083845.8	RPS5	chr19_57629360_A_G_b38	rs73939921	5.2e-05	0.46	Pituitary	A	G	0.11368	0.060875	0.1
ENSG00000142937.11	RPS8	chr1_44853449_A_T_b38	rs11589147	3.6e-08	-0.33	Pituitary	A	T	0.0598973	0.095912	0.1
ENSG00000170889.13	RPS9	chr19_54200892_A_C_b38	rs3810232	7.3e-33	-0.61	Pituitary	A	C	0.0510877	0.297459	0.1
ENSG00000170889.13	RPS9	chr19_54219540_G_A_b38	rs117408808	1.2e-06	-0.57	Pituitary	G	A	0.117389	0.025067	0.1
ENSG00000170889.13	RPS9	chr19_54219160_G_T_b38	rs61734492	3.7e-06	-0.53	Pituitary	G	T	0.114531	0.08128	0.1
ENSG00000170889.13	RPS9	chr19_54224923_C_T_b38	rs11670894	4.9e-06	-0.41	Pituitary	C	T	0.0897347	0.11911	0.1
ENSG00000170889.13	RPS9	chr19_54245621_G_T_b38	rs2247133	1.1e-05	0.25	Pituitary	G	T	0.0568632	0.3945	0.1
ENSG00000170889.13	RPS9	chr19_54217762_C_T_b38	rs404109	1.3e-05	0.34	Pituitary	C	T	0.0779798	0.8671	0.1
ENSG00000124614.13	RPS10	chr6_33988388_A_G_b38	rs2499767	5.7e-06	-0.22	Pituitary	A	G	0.0484878	0.373447	0.1
ENSG00000110700.6	RPS13	chr11_17113185_A_G_b38	rs16933837	9.6e-11	0.62	Pituitary	A	G	0.0957807	0.058219	0.1
ENSG00000164587.11	RPS14	chr5_150425825_A_T_b38	rs6872844	3.1e-05	-0.2	Pituitary	A	T	0.0480078	0.339831	0.1
ENSG00000182774.10	RPS17	chr15_83429327_C_T_b38	rs150519319	2.3e-05	0.48	Pituitary	C	T	0.113379	0.029978	0.1
ENSG00000231500.6	RPS18	chr6_33272092_C_T_b38	rs17215231	1.3e-29	-0.99	Pituitary	C	T	0.0876043	0.052042	0.1
ENSG00000231500.6	RPS18	chr6_33247503_G_T_b38	rs461512	4.6e-08	0.36	Pituitary	G	T	0.0658603	0.113616	0.1
ENSG00000008988.9	RPS20	chr8_56013232_C_T_b38	rs17813240	2e-07	0.24	Pituitary	C	T	0.0461597	0.139694	0.1
ENSG00000186468.12	RPS23	chr5_82273474_A_C_b38	rs3738	1.1e-39	-0.57	Pituitary	A	C	0.0432377	0.32623	0.1
ENSG00000186468.12	RPS23	chr5_81856921_G_A_b38	rs74731984	2.2e-07	-0.24	Pituitary	G	A	0.0463178	0.228134	0.1
ENSG00000186468.12	RPS23	chr5_82609884_C_T_b38	rs77745910	8.5e-06	-0.28	Pituitary	C	T	0.0628904	0.103382	0.1
ENSG00000186468.12	RPS23	chr5_81951562_G_A_b38	rs1542596	3.2e-05	-0.19	Pituitary	G	A	0.0456869	0.374705	0.1
ENSG00000186468.12	RPS23	chr5_81950899_G_A_b38	rs184749188	5.3e-05	-0.62	Pituitary	G	A	0.15339	0.005736	0.1
ENSG00000138326.18	RPS24	chr10_77994341_A_G_b38	rs2818827	1.3e-11	0.27	Pituitary	A	G	0.0398899	0.483285	0.1
ENSG00000138326.18	RPS24	chr10_77711555_C_T_b38	rs2720008	4.6e-05	-0.21	Pituitary	C	T	0.0515328	0.156322	0.1
ENSG00000197728.9	RPS26	chr12_56042145_C_G_b38	rs1131017	1.1e-105	-1.3	Pituitary	C	G	0.0595398	0.444089	0.1
ENSG00000197728.9	RPS26	chr12_56001636_T_A_b38	rs773126	1.1e-06	0.4	Pituitary	T	A	0.0820875	0.369721	0.1
ENSG00000197728.9	RPS26	chr12_55866386_C_G_b38	rs4417323	9e-06	0.46	Pituitary	C	G	0.103606	0.188984	0.1
ENSG00000197728.9	RPS26	chr12_56116134_G_C_b38	rs144131441	1.8e-05	-0.58	Pituitary	G	C	0.13525	0.049579	0.1
ENSG00000197728.9	RPS26	chr12_56189702_A_G_b38	rs11171773	2.8e-05	-0.68	Pituitary	A	G	0.162324	0.226101	0.1
ENSG00000197728.9	RPS26	chr12_56098201_A_G_b38	rs140116753	5.9e-05	0.67	Pituitary	A	G	0.1668	0.038063	0.1
ENSG00000197728.9	RPS26	chr12_56284557_C_T_b38	rs11614512	7.8e-05	0.55	Pituitary	C	T	0.139224	0.073322	0.1
ENSG00000143947.13	RPS27A	chr2_54824721_T_C_b38	rs139829601	2.6e-07	-1.2	Pituitary	T	C	0.232994	0.013826	0.1
ENSG00000233927.4	RPS28	chr19_8322323_G_A_b38	rs1057232	2.5e-29	-0.6	Pituitary	G	A	0.0533653	0.41518	0.1
ENSG00000233927.4	RPS28	chr19_8302030_G_A_b38	rs173665	2.5e-08	0.59	Pituitary	G	A	0.105862	0.107111	0.1
ENSG00000168028.13	RPSA	chr3_39405803_A_C_b38	rs4676494	2e-18	-0.45	Pituitary	A	C	0.0513858	0.490207	0.1
ENSG00000168028.13	RPSA	chr3_39281672_A_C_b38	rs11715522	8.3e-07	0.26	Pituitary	A	C	0.0527578	0.359131	0.1
ENSG00000168028.13	RPSA	chr3_39330021_G_A_b38	rs6800209	1.8e-06	-0.48	Pituitary	G	A	0.10053	0.045255	0.1
ENSG00000168028.13	RPSA	chr3_39235168_C_G_b38	rs2271489	2.7e-05	0.37	Pituitary	C	G	0.0881499	0.088786	0.1
ENSG00000148303.16	RPL7A	chr9_134336340_T_C_b38	rs73567692	1e-06	-0.38	Pituitary	T	C	0.0776836	0.07053	0.1
ENSG00000161016.17	RPL8	chr8_144792397_C_T_b38	rs2954658	2.6e-18	-0.35	Pituitary	C	T	0.0401024	0.422902	0.1
ENSG00000161016.17	RPL8	chr8_144830143_A_C_b38	rs72699313	3.8e-08	-0.4	Pituitary	A	C	0.0727286	0.06758	0.1
ENSG00000163682.15	RPL9	chr4_39450879_T_C_b38	rs2687969	2e-65	-0.82	Pituitary	T	C	0.0480021	0.365612	0.1
ENSG00000163682.15	RPL9	chr4_39511110_A_T_b38	rs78384777	1.7e-10	0.86	Pituitary	A	T	0.134664	0.034176	0.1
ENSG00000163682.15	RPL9	chr4_39493233_G_A_b38	rs58971671	4.8e-08	0.79	Pituitary	G	A	0.144727	0.122632	0.1
ENSG00000163682.15	RPL9	chr4_39473454_A_C_b38	rs2259073	6.2e-06	-0.39	Pituitary	A	C	0.0862937	0.12641	0.1
ENSG00000163682.15	RPL9	chr4_39960201_A_G_b38	rs11097009	4.7e-05	-0.3	Pituitary	A	G	0.0737089	0.381549	0.1
ENSG00000198755.10	RPL10A	chr6_35460232_C_T_b38	rs45500193	2.6e-07	-0.43	Pituitary	C	T	0.0834895	0.039923	0.1
ENSG00000198755.10	RPL10A	chr6_35472155_T_C_b38	rs12525930	3.3e-07	-0.21	Pituitary	T	C	0.0411325	0.443721	0.1
ENSG00000197958.12	RPL12	chr9_127432216_C_T_b38	rs4400487	6.8e-17	0.39	Pituitary	C	T	0.046704	0.409701	0.1
ENSG00000197958.12	RPL12	chr9_127437267_G_T_b38	rs6478778	7.9e-10	0.55	Pituitary	G	T	0.0894756	0.136116	0.1
ENSG00000197958.12	RPL12	chr9_128305983_C_A_b38	rs74659866	2.8e-05	0.58	Pituitary	C	A	0.138453	0.075335	0.1
ENSG00000163584.17	RPL22L1	chr3_170860932_C_T_b38	rs34587559	1.7e-05	-0.23	Pituitary	C	T	0.0534755	0.191348	0.1
ENSG00000131469.12	RPL27	chr17_42932593_A_C_b38	rs692609	7.7e-05	-0.21	Pituitary	A	C	0.0531168	0.22978	0.1
ENSG00000108107.14	RPL28	chr19_55385959_A_G_b38	rs17700376	8.6e-24	-0.43	Pituitary	A	G	0.0427584	0.296294	0.1
ENSG00000108107.14	RPL28	chr19_55380764_T_G_b38	rs73617860	6.9e-06	0.26	Pituitary	T	G	0.0578195	0.271411	0.1
ENSG00000165502.6	RPL36AL	chr14_49639028_C_G_b38	rs11157696	1e-33	0.51	Pituitary	C	G	0.0421332	0.320647	0.1
ENSG00000165502.6	RPL36AL	chr14_49823935_G_C_b38	rs7160493	1.4e-07	-0.4	Pituitary	G	C	0.0759698	0.079472	0.1
ENSG00000145592.13	RPL37	chr5_41664103_A_G_b38	rs112393535	2.5e-05	-0.63	Pituitary	A	G	0.149473	0.014017	0.1
ENSG00000177600.8	RPLP2	chr11_823809_C_G_b38	rs1135628	2.6e-08	-0.23	Pituitary	C	G	0.0413191	0.267173	0.1
ENSG00000221983.7	UBA52	chr19_18568569_C_G_b38	rs7648	2.6e-14	-0.28	Pituitary	C	G	0.0367607	0.487243	0.1
ENSG00000221983.7	UBA52	chr19_18584880_C_T_b38	rs144474740	1.4e-07	0.39	Pituitary	C	T	0.0740706	0.03714	0.1
ENSG00000147403.16	RPL10	chrX_154414718_C_T_b38	rs28706542	6.2e-22	-0.45	Pituitary	C	T	0.0467476	0.8855	0.1
ENSG00000109475.16	RPL34	chr4_108065458_T_C_b38	rs72894325	3e-06	-1.2	Pituitary	T	C	0.256914	0.052697	0.1
Small intestine
Gencode	Gene	Variant.Id	SNP	PVal	beta	Tissue	other_allele	effect_allele	se	eaf	LDthreshold
ENSG00000149273.14	RPS3	chr11_75418125_C_T_b38	rs12795298	1.8e-08	-0.38	Small Intestine - Terminal Ileum	C	T	0.0674932	0.077742	0.1
ENSG00000083845.8	RPS5	chr19_58387069_T_C_b38	rs731835	3.4e-06	-0.19	Small Intestine - Terminal Ileum	T	C	0.0409038	0.33096	0.1
ENSG00000142937.11	RPS8	chr1_44631645_C_T_b38	rs74554154	2.1e-05	0.35	Small Intestine - Terminal Ileum	C	T	0.0822758	0.020328	0.1
ENSG00000142937.11	RPS8	chr1_44956140_T_A_b38	rs12137819	5.7e-05	-0.19	Small Intestine - Terminal Ileum	T	A	0.0472062	0.118264	0.1
ENSG00000170889.13	RPS9	chr19_54200892_A_C_b38	rs3810232	5.3e-16	-0.37	Small Intestine - Terminal Ileum	A	C	0.0456541	0.297459	0.1
ENSG00000170889.13	RPS9	chr19_54217762_C_T_b38	rs404109	1.1e-05	0.32	Small Intestine - Terminal Ileum	C	T	0.0727848	0.8671	0.1
ENSG00000124614.13	RPS10	chr6_34294740_G_C_b38	rs116428782	3.6e-05	0.34	Small Intestine - Terminal Ileum	G	C	0.0822894	0.04257	0.1
ENSG00000110700.6	RPS13	chr11_17110177_T_A_b38	rs115242230	2.8e-08	0.48	Small Intestine - Terminal Ileum	T	A	0.0864319	0.046799	0.1
ENSG00000134419.15	RPS15A	chr16_18744714_C_T_b38	rs2641822	8.3e-07	0.17	Small Intestine - Terminal Ileum	C	T	0.0344955	0.28908	0.1
ENSG00000105193.8	RPS16	chr19_39436900_C_T_b38	rs530411	5.5e-15	0.29	Small Intestine - Terminal Ileum	C	T	0.0371085	0.439478	0.1
ENSG00000182774.10	RPS17	chr15_82797592_T_C_b38	rs4779065	1.5e-06	0.21	Small Intestine - Terminal Ileum	T	C	0.0436478	0.184174	0.1
ENSG00000231500.6	RPS18	chr6_33272092_C_T_b38	rs17215231	2e-33	-0.9	Small Intestine - Terminal Ileum	C	T	0.0747045	0.052042	0.1
ENSG00000231500.6	RPS18	chr6_33651778_G_A_b38	rs79592126	4.6e-08	-1.1	Small Intestine - Terminal Ileum	G	A	0.20124	0.01517	0.1
ENSG00000231500.6	RPS18	chr6_33123280_C_T_b38	rs3117024	1.8e-07	-0.37	Small Intestine - Terminal Ileum	C	T	0.0708963	0.188584	0.1
ENSG00000231500.6	RPS18	chr6_32458545_A_C_b38	rs28895215	4.4e-06	-0.35	Small Intestine - Terminal Ileum	A	C	0.0762272	0.120807	0.1
ENSG00000231500.6	RPS18	chr6_33804091_G_A_b38	rs72896138	5.3e-06	-0.84	Small Intestine - Terminal Ileum	G	A	0.184512	0.01689	0.1
ENSG00000231500.6	RPS18	chr6_33768895_G_A_b38	rs747695	2.6e-05	0.26	Small Intestine - Terminal Ileum	G	A	0.0618173	0.348623	0.1
ENSG00000186468.12	RPS23	chr5_82273269_C_T_b38	rs111772743	1.2e-09	-0.25	Small Intestine - Terminal Ileum	C	T	0.0411168	0.30809	0.1
ENSG00000186468.12	RPS23	chr5_81794088_T_C_b38	rs141216206	4e-06	-0.52	Small Intestine - Terminal Ileum	T	C	0.112764	0.016053	0.1
ENSG00000186468.12	RPS23	chr5_81656208_C_T_b38	rs140710809	6.9e-06	-0.48	Small Intestine - Terminal Ileum	C	T	0.106744	0.027771	0.1
ENSG00000186468.12	RPS23	chr5_81856921_G_A_b38	rs74731984	5e-05	-0.17	Small Intestine - Terminal Ileum	G	A	0.0419171	0.228134	0.1
ENSG00000118181.10	RPS25	chr11_118998040_G_C_b38	rs4445645	3e-06	-0.17	Small Intestine - Terminal Ileum	G	C	0.0363962	0.262639	0.1
ENSG00000197728.9	RPS26	chr12_56042145_C_G_b38	rs1131017	2.7e-54	-1.1	Small Intestine - Terminal Ileum	C	G	0.0708941	0.444089	0.1
ENSG00000197728.9	RPS26	chr12_56017922_G_A_b38	rs117396149	3.2e-05	0.93	Small Intestine - Terminal Ileum	G	A	0.223625	0.026158	0.1
ENSG00000233927.4	RPS28	chr19_8322323_G_A_b38	rs1057232	8e-14	-0.34	Small Intestine - Terminal Ileum	G	A	0.0455134	0.41518	0.1
ENSG00000168028.13	RPSA	chr3_39386514_G_T_b38	rs12486423	9.5e-10	0.21	Small Intestine - Terminal Ileum	G	T	0.0343272	0.398029	0.1
ENSG00000161016.17	RPL8	chr8_144794305_G_A_b38	rs2958519	4.7e-13	0.33	Small Intestine - Terminal Ileum	G	A	0.0456198	0.434704	0.1
ENSG00000163682.15	RPL9	chr4_39444929_G_A_b38	rs1458255	4e-37	-0.58	Small Intestine - Terminal Ileum	G	A	0.0455597	0.352894	0.1
ENSG00000163682.15	RPL9	chr4_39450670_C_T_b38	rs9995998	1.3e-06	-0.31	Small Intestine - Terminal Ileum	C	T	0.0640528	0.19885	0.1
ENSG00000163682.15	RPL9	chr4_39537625_G_T_b38	rs80150520	5.8e-06	-0.28	Small Intestine - Terminal Ileum	G	T	0.0617617	0.159241	0.1
ENSG00000198755.10	RPL10A	chr6_35469148_C_T_b38	rs2076172	1.3e-07	-0.19	Small Intestine - Terminal Ileum	C	T	0.0359927	0.439082	0.1
ENSG00000197958.12	RPL12	chr9_127467373_A_G_b38	rs2253806	9.9e-14	0.29	Small Intestine - Terminal Ileum	A	G	0.0389668	0.349885	0.1
ENSG00000167526.13	RPL13	chr16_89561052_T_G_b38	rs2280370	5.3e-07	-0.26	Small Intestine - Terminal Ileum	T	G	0.0518432	0.199482	0.1
ENSG00000188846.13	RPL14	chr3_40337247_T_C_b38	rs2123999	1.1e-07	-0.22	Small Intestine - Terminal Ileum	T	C	0.0414361	0.428315	0.1
ENSG00000163584.17	RPL22L1	chr3_170857086_T_C_b38	rs34934154	1.6e-05	-0.19	Small Intestine - Terminal Ileum	T	C	0.044038	0.200905	0.1
ENSG00000108107.14	RPL28	chr19_55385959_A_G_b38	rs17700376	1.8e-10	-0.28	Small Intestine - Terminal Ileum	A	G	0.0439043	0.296294	0.1
ENSG00000108107.14	RPL28	chr19_55832912_G_A_b38	rs12981098	1.3e-05	0.3	Small Intestine - Terminal Ileum	G	A	0.0688057	0.093019	0.1
ENSG00000165502.6	RPL36AL	chr14_49619845_C_T_b38	rs3007030	1.3e-18	0.56	Small Intestine - Terminal Ileum	C	T	0.0635949	0.286685	0.1
ENSG00000165502.6	RPL36AL	chr14_49533934_C_G_b38	rs1901792	2.2e-05	-0.34	Small Intestine - Terminal Ileum	C	G	0.0801214	0.208588	0.1
ENSG00000165502.6	RPL36AL	chr14_50472338_A_C_b38	rs185869021	5.4e-05	-1.8	Small Intestine - Terminal Ileum	A	C	0.445809	0.011503	0.1
ENSG00000221983.7	UBA52	chr19_18557325_C_G_b38	rs3761036	3.6e-11	-0.24	Small Intestine - Terminal Ileum	C	G	0.0362556	0.295128	0.1
ENSG00000204628.11	RACK1	chr5_181240769_C_T_b38	rs2546404	1.1e-05	-0.35	Small Intestine - Terminal Ileum	C	T	0.0796084	0.139398	0.1
ENSG00000147403.16	RPL10	chrX_154394242_C_A_b38	rs60516219	2.1e-11	-0.28	Small Intestine - Terminal Ileum	C	A	0.0417979	0.227462†	0.1
Brain-cortex
Gencode	Gene	Variant.Id	SNP	PVal	beta	Tissue	other_allele	effect_allele	se	eaf	LDthreshold
ENSG00000168028.13	RPSA	chr3_39405803_A_C_b38	rs4676494	4.7e-08	-0.24	Brain - Cortex	A	C	0.069318	0.490207	0.1
ENSG00000233927.4	RPS28	chr19_8322323_G_A_b38	rs1057232	4.2e-23	-0.4	Brain - Cortex	G	A	0.0506386	0.41518	0.1
ENSG00000233927.4	RPS28	chr19_8870040_T_C_b38	rs10426111	1.2e-05	-0.21	Brain - Cortex	T	C	0.0883248	0.341218	0.1
ENSG00000185088.13	RPS27L	chr15_63148316_A_C_b38	rs7169648	1.3e-08	-0.35	Brain - Cortex	A	C	0.0949522	0.136401	0.1
ENSG00000197728.9	RPS26	chr12_56042145_C_G_b38	rs1131017	2.8e-80	-1.1	Brain - Cortex	C	G	0.0648052	0.444089	0.1
ENSG00000197728.9	RPS26	chr12_56001636_T_A_b38	rs773126	1.8e-08	0.45	Brain - Cortex	T	A	0.12396	0.369721	0.1
ENSG00000197728.9	RPS26	chr12_56034460_G_A_b38	rs77508451	7.3e-06	-0.77	Brain - Cortex	G	A	0.309891	0.047728	0.1
ENSG00000197728.9	RPS26	chr12_55962775_A_G_b38	rs11171705	1.6e-05	0.69	Brain - Cortex	A	G	0.298127	0.070294	0.1
ENSG00000197728.9	RPS26	chr12_56098201_A_G_b38	rs140116753	2.4e-05	0.71	Brain - Cortex	A	G	0.319244	0.038063	0.1
ENSG00000197728.9	RPS26	chr12_55866386_C_G_b38	rs4417323	9.9e-05	0.39	Brain - Cortex	C	G	0.206019	0.188984	0.1
ENSG00000118181.10	RPS25	chr11_119016871_C_T_b38	rs7105187	3e-10	-0.23	Brain - Cortex	C	T	0.0535036	0.259955	0.1
ENSG00000138326.18	RPS24	chr10_78119923_T_C_b38	rs2253513	4.9e-09	-0.18	Brain - Cortex	T	C	0.0467468	0.479714	0.1
ENSG00000138326.18	RPS24	chr10_78000243_T_G_b38	rs2241551	1.9e-07	-0.36	Brain - Cortex	T	G	0.112189	0.179396	0.1
ENSG00000186468.12	RPS23	chr5_82281146_C_A_b38	rs226196	1.7e-44	0.92	Brain - Cortex	C	A	0.0767061	0.304335	0.1
ENSG00000186468.12	RPS23	chr5_81849647_C_A_b38	rs11750053	4.1e-09	-0.46	Brain - Cortex	C	A	0.118553	0.24042	0.1
ENSG00000186468.12	RPS23	chr5_81946929_G_A_b38	rs10042896	1.3e-07	0.36	Brain - Cortex	G	A	0.109795	0.47224	0.1
ENSG00000186468.12	RPS23	chr5_82199153_T_A_b38	rs76894712	2.8e-05	0.42	Brain - Cortex	T	A	0.191855	0.117647	0.1
ENSG00000008988.9	RPS20	chr8_56024788_G_C_b38	rs2466008	2.1e-17	0.29	Brain - Cortex	G	C	0.0446971	0.170185	0.1
ENSG00000008988.9	RPS20	chr8_56091371_T_C_b38	rs7013949	3.3e-05	-0.52	Brain - Cortex	T	C	0.241668	0.033508	0.1
ENSG00000008988.9	RPS20	chr8_55934611_A_G_b38	rs13249338	4.7e-05	0.13	Brain - Cortex	A	G	0.0628	0.447016	0.1
ENSG00000008988.9	RPS20	chr8_56190121_G_A_b38	rs111940206	5.4e-05	0.4	Brain - Cortex	G	A	0.196309	0.014714	0.1
ENSG00000231500.6	RPS18	chr6_33272092_C_T_b38	rs17215231	3.4e-23	-0.68	Brain - Cortex	C	T	0.0858562	0.052042	0.1
ENSG00000231500.6	RPS18	chr6_33131691_A_G_b38	rs3116991	1.2e-05	0.18	Brain - Cortex	A	G	0.075707	0.49026	0.1
ENSG00000231500.6	RPS18	chr6_33651778_G_A_b38	rs79592126	1.8e-05	-0.59	Brain - Cortex	G	A	0.257827	0.01517	0.1
ENSG00000231500.6	RPS18	chr6_33247503_G_T_b38	rs461512	2e-05	0.25	Brain - Cortex	G	T	0.110381	0.113616	0.1
ENSG00000231500.6	RPS18	chr6_33122311_C_G_b38	rs3117026	4.1e-05	-0.19	Brain - Cortex	C	G	0.0904	0.261428	0.1
ENSG00000182774.10	RPS17	chr15_82662403_C_T_b38	rs2278355	2.2e-10	0.22	Brain - Cortex	C	T	0.0506133	0.451889	0.1
ENSG00000182774.10	RPS17	chr15_82371941_G_C_b38	rs202209146	0.0001	-0.15	Brain - Cortex	G	C	0.0793402	0.462061	0.1
ENSG00000164587.11	RPS14	chr5_150446963_C_T_b38	rs4841	2.7e-11	-0.29	Brain - Cortex	C	T	0.0622041	0.264877	0.1
ENSG00000112306.7	RPS12	chr6_132730621_A_C_b38	rs6569839	1.6e-05	-0.14	Brain - Cortex	A	C	0.0604895	0.425818	0.1
ENSG00000142534.6	RPS11	chr19_49496390_C_G_b38	rs17555056	2.4e-06	-0.18	Brain - Cortex	C	G	0.0662631	0.204714	0.1
ENSG00000170889.13	RPS9	chr19_54202044_C_G_b38	rs67627137	2.2e-19	-0.38	Brain - Cortex	C	G	0.0542639	0.291534	0.1
ENSG00000170889.13	RPS9	chr19_54219869_C_G_b38	rs255772	1.2e-07	0.32	Brain - Cortex	C	G	0.0971612	0.231723	0.1
ENSG00000170889.13	RPS9	chr19_54219540_G_A_b38	rs117408808	1.4e-06	-0.47	Brain - Cortex	G	A	0.166371	0.025067	0.1
ENSG00000142937.11	RPS8	chr1_44833378_G_C_b38	rs16832263	7e-11	-0.22	Brain - Cortex	G	C	0.0486655	0.234625	0.1
ENSG00000142937.11	RPS8	chr1_44497791_C_G_b38	rs7516631	8.6e-05	0.13	Brain - Cortex	C	G	0.0674612	0.31177	0.1
ENSG00000171863.12	RPS7	chr2_3577209_G_A_b38	rs9808287	6.5e-08	-0.33	Brain - Cortex	G	A	0.0969314	0.126277	0.1
ENSG00000171863.12	RPS7	chr2_3584174_G_A_b38	rs62106050	1.8e-05	-0.31	Brain - Cortex	G	A	0.135468	0.050147	0.1
ENSG00000083845.8	RPS5	chr19_58388970_C_T_b38	rs7250889	8.7e-09	-0.24	Brain - Cortex	C	T	0.0639266	0.452594	0.1
ENSG00000149273.14	RPS3	chr11_75410143_G_T_b38	rs373711199	1.6e-08	-0.35	Brain - Cortex	G	T	0.0958778	0.04688	0.1
ENSG00000140988.15	RPS2	chr16_1957551_C_T_b38	rs148483718	8.4e-06	-0.42	Brain - Cortex	C	T	0.171098	0.037323	0.1
ENSG00000146223.14	RPL7L1	chr6_42873493_G_A_b38	rs1150797	7.5e-08	-0.21	Brain - Cortex	G	A	0.062153	0.181838	0.1
ENSG00000161016.17	RPL8	chr8_144770380_G_A_b38	rs66716313	3.8e-10	-0.21	Brain - Cortex	G	A	0.0492723	0.412705	0.1
ENSG00000161016.17	RPL8	chr8_145064496_G_T_b38	rs35663774	3.8e-05	0.16	Brain - Cortex	G	T	0.0754961	0.43355	0.1
ENSG00000163682.15	RPL9	chr4_39444929_G_A_b38	rs1458255	3.1e-63	-0.8	Brain - Cortex	G	A	0.0541059	0.352894	0.1
ENSG00000163682.15	RPL9	chr4_39455015_T_C_b38	rs10025155	1.7e-07	-0.39	Brain - Cortex	T	C	0.120763	0.199151	0.1
ENSG00000163682.15	RPL9	chr4_39237844_T_C_b38	rs75771272	8.4e-07	0.49	Brain - Cortex	T	C	0.167473	0.137711	0.1
ENSG00000163682.15	RPL9	chr4_39474744_C_T_b38	rs538846657	4.1e-06	0.73	Brain - Cortex	C	T	0.280096	0.01885	0.1
ENSG00000163682.15	RPL9	chr4_39567529_G_A_b38	rs142160737	1.1e-05	0.59	Brain - Cortex	G	A	0.24619	0.044171	0.1
ENSG00000163682.15	RPL9	chr4_39793691_A_C_b38	rs6817831	1.6e-05	-0.42	Brain - Cortex	A	C	0.181469	0.106195	0.1
ENSG00000198755.10	RPL10A	chr6_35472155_T_C_b38	rs12525930	3.5e-11	-0.33	Brain - Cortex	T	C	0.0713693	0.443721	0.1
ENSG00000198755.10	RPL10A	chr6_35469145_C_T_b38	rs11553984	5.3e-10	-0.87	Brain - Cortex	C	T	0.206653	0.025239	0.1
ENSG00000198755.10	RPL10A	chr6_34653807_T_C_b38	rs79796289	5e-05	0.26	Brain - Cortex	T	C	0.126482	0.118508	0.1
ENSG00000197958.12	RPL12	chr9_127432257_G_C_b38	rs4641163	5.7e-30	0.42	Brain - Cortex	G	C	0.0448096	0.375834	0.1
ENSG00000197958.12	RPL12	chr9_127438090_G_A_b38	rs10987651	1.8e-11	0.56	Brain - Cortex	G	A	0.118609	0.091187	0.1
ENSG00000197958.12	RPL12	chr9_126711297_G_A_b38	rs2417033	1.8e-06	0.24	Brain - Cortex	G	A	0.0864967	0.288309	0.1
ENSG00000197958.12	RPL12	chr9_126884749_A_G_b38	rs571606	2.4e-05	-0.31	Brain - Cortex	A	G	0.139388	0.094873	0.1
ENSG00000167526.13	RPL13	chr16_89472351_C_T_b38	rs7196903	3.2e-05	-0.2	Brain - Cortex	C	T	0.0926464	0.161071	0.1
ENSG00000142541.16	RPL13A	chr19_49955974_G_A_b38	rs283514	1.2e-05	-0.43	Brain - Cortex	G	A	0.180856	0.01731	0.1
ENSG00000108107.14	RPL28	chr19_55385959_A_G_b38	rs17700376	7.5e-16	-0.25	Brain - Cortex	A	G	0.0412399	0.296294	0.1
ENSG00000162244.10	RPL29	chr3_51986395_C_T_b38	rs323893	4.6e-06	-0.32	Brain - Cortex	C	T	0.123923	0.107079	0.1
ENSG00000071082.10	RPL31	chr2_101786476_C_T_b38	rs17205284	1.5e-05	-0.26	Brain - Cortex	C	T	0.111651	0.069022	0.1
ENSG00000109475.16	RPL34	chr4_109122835_G_A_b38	rs76662861	5.4e-05	-0.28	Brain - Cortex	G	A	0.137416	0.05857	0.1
ENSG00000130255.12	RPL36	chr19_5609728_G_T_b38	rs148040441	6.3e-06	-0.62	Brain - Cortex	G	T	0.246417	0.009784	0.1
ENSG00000165502.6	RPL36AL	chr14_49620639_C_G_b38	rs1952013	2.3e-27	0.64	Brain - Cortex	C	G	0.0724231	0.45647	0.1
ENSG00000165502.6	RPL36AL	chr14_49819095_G_A_b38	rs34654758	4.2e-07	-0.5	Brain - Cortex	G	A	0.163417	0.080555	0.1
ENSG00000221983.7	UBA52	chr19_18581132_A_G_b38	rs2314664	8.5e-09	-0.21	Brain - Cortex	A	G	0.0558774	0.320683	0.1
ENSG00000221983.7	UBA52	chr19_19365556_G_A_b38	rs2965200	4.9e-05	0.17	Brain - Cortex	G	A	0.0825104	0.419034	0.1
ENSG00000110700.6	RPS13	chr11_16496247_T_C_b38	rs78823924	2e-05	0.59	Brain - Cortex	T	C	0.260498	0.007079	0.1
ENSG00000147403.16	RPL10	chrX_154355526_T_C_b38	rs2070828	5.6e-23	-0.36	Brain - Cortex	T	C	0.0457416	0.295959	0.1
ENSG00000198918.7	RPL39	chrX_119325542_C_A_b38	rs144195631	1.2e-06	-0.79	Brain - Cortex	C	A	0.276646	0.013759	0.1
Liver
Gencode	Gene	Variant.Id	SNP	PVal	beta	Tissue	other_allele	effect_allele	se	eaf	LDthreshold
ENSG00000140988.15	RPS2	chr16_1974354_G_T_b38	rs3743850	1.4e-06	0.31	Liver	G	T	0.0642486	0.149561	0.1
ENSG00000149273.14	RPS3	chr11_75415306_G_A_b38	rs12798081	1.1e-06	-0.46	Liver	G	A	0.0944006	0.066482	0.1
ENSG00000171863.12	RPS7	chr2_3608153_C_T_b38	rs4850068	3.5e-06	-0.22	Liver	C	T	0.0474234	0.401926	0.1
ENSG00000171863.12	RPS7	chr2_3586327_T_C_b38	rs11684944	7.1e-06	0.21	Liver	T	C	0.0467636	0.415583	0.1
ENSG00000231500.6	RPS18	chr6_33272092_C_T_b38	rs17215231	2.4e-12	-0.57	Liver	C	T	0.0813238	0.052042	0.1
ENSG00000186468.12	RPS23	chr5_82289207_G_T_b38	rs226194	4.5e-12	0.32	Liver	G	T	0.0462393	0.307222	0.1
ENSG00000186468.12	RPS23	chr5_81479731_C_T_b38	rs146031396	4.9e-05	-0.51	Liver	C	T	0.125605	0.019718	0.1
ENSG00000197728.9	RPS26	chr12_56042145_C_G_b38	rs1131017	1.8e-59	-1	Liver	C	G	0.0614884	0.444089	0.1
ENSG00000233927.4	RPS28	chr19_8329208_T_C_b38	rs2972574	8.1e-16	-0.41	Liver	T	C	0.0509147	0.411701	0.1
ENSG00000168028.13	RPSA	chr3_39387163_C_G_b38	rs56713196	2.5e-09	-0.36	Liver	C	G	0.0603879	0.13783	0.1
ENSG00000174444.14	RPL4	chr15_66525207_G_A_b38	rs12911848	3.7e-06	0.2	Liver	G	A	0.0432193	0.357439	0.1
ENSG00000146223.14	RPL7L1	chr6_42888764_T_G_b38	rs9462844	8.8e-06	-0.17	Liver	T	G	0.0382475	0.304548	0.1
ENSG00000163682.15	RPL9	chr4_39448204_G_A_b38	rs2687967	1.7e-30	-0.71	Liver	G	A	0.061857	0.351855	0.1
ENSG00000163682.15	RPL9	chr4_39546862_C_T_b38	rs2608822	7.5e-07	-0.63	Liver	C	T	0.127326	0.096846	0.1
ENSG00000163682.15	RPL9	chr4_39397005_T_C_b38	rs6857705	3.6e-06	0.31	Liver	T	C	0.0669079	0.467789	0.1
ENSG00000197958.12	RPL12	chr9_127432216_C_T_b38	rs4400487	1.2e-09	0.26	Liver	C	T	0.0427614	0.409701	0.1
ENSG00000108298.9	RPL19	chr17_39648099_T_C_b38	rs12103674	1.2e-05	0.25	Liver	T	C	0.0571091	0.140237	0.1
ENSG00000108107.14	RPL28	chr19_55385959_A_G_b38	rs17700376	3.2e-11	-0.37	Liver	A	G	0.0557476	0.296294	0.1
ENSG00000165502.6	RPL36AL	chr14_49604976_C_G_b38	rs8014170	1.9e-06	0.19	Liver	C	G	0.0398843	0.286155	0.1
ENSG00000198034.10	RPS4X	chrX_72320099_C_T_b38	rs73624231	2.8e-05	0.52	Liver	C	T	0.12413	0.028369	0.1
ENSG00000164587.11	RPS14	chr5_149900522_T_C_b38	rs76732689	4.3e-06	0.93	Liver	T	C	0.202335	0.04575	0.1
ENSG00000100316.15	RPL3	chr22_40117761_A_G_b38	rs6001775	4.7e-07	-0.72	Liver	A	G	0.142909	0.121821	0.1
ENSG00000147403.16	RPL10	chrX_154405018_C_G_b38	rs1130929	1.9e-06	-0.28	Liver	C	G	0.0587769	0.291754	0.1
ENSG00000163584.17	RPL22L1	chr3_171116995_A_G_b38	rs6444961	4.3e-08	-0.74	Liver	A	G	0.135084	0.112882	0.1
ENSG00000145592.13	RPL37	chr5_41058881_C_T_b38	rs112541965	1.2e-05	-0.92	Liver	C	T	0.210161	0.039092	0.1
ENSG00000089157.15	RPLP0	chr12_120275566_T_C_b38	rs111417898	2.3e-06	-1	Liver	T	C	0.211636	0.026455	0.1
Muscle-skeletal
Gencode	Gene	Variant.Id	SNP	PVal	beta	Tissue	other_allele	effect_allele	se	eaf	LDthreshold
ENSG00000149806.10	FAU	chr11_65121562_G_A_b38	rs13807	9.7e-06	0.35	Muscle - Skeletal	G	A	0.0791183	0.009903	0.1
ENSG00000140988.15	RPS2	chr16_1973371_A_C_b38	rs1860236	1.7e-14	-0.23	Muscle - Skeletal	A	C	0.0299811	0.244209	0.1
ENSG00000140988.15	RPS2	chr16_1964777_A_G_b38	rs17135716	2e-12	0.26	Muscle - Skeletal	A	G	0.0369608	0.097711	0.1
ENSG00000140988.15	RPS2	chr16_1964282_A_G_b38	rs2286466	2.2e-10	-0.18	Muscle - Skeletal	A	G	0.0283613	0.126148	0.1
ENSG00000140988.15	RPS2	chr16_2078727_C_T_b38	rs17596071	1.5e-06	0.38	Muscle - Skeletal	C	T	0.0789818	0.00639	0.1
ENSG00000140988.15	RPS2	chr16_1957718_T_C_b38	rs147809373	2.6e-05	-0.22	Muscle - Skeletal	T	C	0.052307	0.0381	0.1
ENSG00000140988.15	RPS2	chr16_1059653_C_T_b38	rs2056993	4.6e-05	-0.16	Muscle - Skeletal	C	T	0.0392631	0.200342	0.1
ENSG00000149273.14	RPS3	chr11_75398824_T_C_b38	rs3133186	9.8e-45	-0.53	Muscle - Skeletal	T	C	0.0377683	0.071802	0.1
ENSG00000149273.14	RPS3	chr11_75321976_A_G_b38	rs113636971	6.2e-11	-0.28	Muscle - Skeletal	A	G	0.0428211	0.076913	0.1
ENSG00000149273.14	RPS3	chr11_75385019_C_T_b38	rs676703	1.3e-06	-0.099	Muscle - Skeletal	C	T	0.0204556	0.435522	0.1
ENSG00000149273.14	RPS3	chr11_75317563_C_T_b38	rs555031	6.2e-06	0.096	Muscle - Skeletal	C	T	0.0212415	0.425165	0.1
ENSG00000149273.14	RPS3	chr11_75509652_G_A_b38	rs12417071	1.1e-05	-0.21	Muscle - Skeletal	G	A	0.047765	0.041868	0.1
ENSG00000149273.14	RPS3	chr11_75430585_T_C_b38	rs11236430	1.2e-05	-0.093	Muscle - Skeletal	T	C	0.0212446	0.371396	0.1
ENSG00000149273.14	RPS3	chr11_75327280_T_C_b38	rs7112048	2.1e-05	0.093	Muscle - Skeletal	T	C	0.0218619	0.4549	0.1
ENSG00000145425.9	RPS3A	chr4_150142765_A_G_b38	rs11099756	9.7e-05	0.13	Muscle - Skeletal	A	G	0.0333506	0.095489	0.1
ENSG00000145425.9	RPS3A	chr4_151073002_A_G_b38	rs77113754	0.00016	-0.15	Muscle - Skeletal	A	G	0.039735	0.091902	0.1
ENSG00000083845.8	RPS5	chr19_58394796_T_C_b38	rs2241787	5.8e-16	-0.14	Muscle - Skeletal	T	C	0.0172979	0.445721	0.1
ENSG00000083845.8	RPS5	chr19_58382868_C_T_b38	rs1865960	6.5e-09	-0.18	Muscle - Skeletal	C	T	0.0310165	0.09963	0.1
ENSG00000083845.8	RPS5	chr19_58468591_C_T_b38	rs7254178	2.9e-07	-0.19	Muscle - Skeletal	C	T	0.0370382	0.05356	0.1
ENSG00000137154.12	RPS6	chr9_19380241_A_T_b38	rs41270113	1.5e-24	0.34	Muscle - Skeletal	A	T	0.0332451	0.061308	0.1
ENSG00000137154.12	RPS6	chr9_19323817_G_A_b38	rs72700413	6.9e-16	-0.24	Muscle - Skeletal	G	A	0.0297314	0.064854	0.1
ENSG00000137154.12	RPS6	chr9_19446665_A_C_b38	rs10757059	3.3e-05	0.07	Muscle - Skeletal	A	C	0.0168605	0.485972	0.1
ENSG00000137154.12	RPS6	chr9_19231645_C_T_b38	rs10123714	4.2e-05	0.069	Muscle - Skeletal	C	T	0.0168449	0.448057	0.1
ENSG00000137154.12	RPS6	chr9_19436964_T_C_b38	rs10118605	4.6e-05	-0.068	Muscle - Skeletal	T	C	0.0166868	0.495053	0.1
ENSG00000171863.12	RPS7	chr2_3577209_G_A_b38	rs9808287	1e-09	-0.16	Muscle - Skeletal	G	A	0.0261891	0.126277	0.1
ENSG00000171863.12	RPS7	chr2_3575322_G_T_b38	rs11558965	4.8e-08	-0.19	Muscle - Skeletal	G	T	0.0348077	0.051874	0.1
ENSG00000171863.12	RPS7	chr2_3544579_T_C_b38	rs71449679	6.6e-06	0.1	Muscle - Skeletal	T	C	0.0221917	0.195788	0.1
ENSG00000171863.12	RPS7	chr2_4105174_C_T_b38	rs6710162	4.6e-05	-0.15	Muscle - Skeletal	C	T	0.0368092	0.058059	0.1
ENSG00000142937.11	RPS8	chr1_44743989_A_G_b38	rs16832210	6.8e-19	-0.22	Muscle - Skeletal	A	G	0.02478	0.10612	0.1
ENSG00000142937.11	RPS8	chr1_44810755_G_A_b38	rs3795718	1.7e-09	0.12	Muscle - Skeletal	G	A	0.0199198	0.144793	0.1
ENSG00000170889.13	RPS9	chr19_54207390_G_T_b38	rs2304523	9e-40	0.3	Muscle - Skeletal	G	T	0.0227306	0.28129	0.1
ENSG00000170889.13	RPS9	chr19_54197855_T_C_b38	rs166252	1.2e-21	-0.19	Muscle - Skeletal	T	C	0.0198785	0.36199	0.1
ENSG00000170889.13	RPS9	chr19_54207044_T_G_b38	rs77232016	9.9e-09	-0.29	Muscle - Skeletal	T	G	0.0505893	0.022135	0.1
ENSG00000170889.13	RPS9	chr19_54219540_G_A_b38	rs117408808	4.9e-07	-0.24	Muscle - Skeletal	G	A	0.0477119	0.025067	0.1
ENSG00000170889.13	RPS9	chr19_54205904_C_T_b38	rs71365433	2.2e-06	-0.15	Muscle - Skeletal	C	T	0.0316848	0.075196	0.1
ENSG00000170889.13	RPS9	chr19_54229765_G_C_b38	rs57317131	1.1e-05	-0.09	Muscle - Skeletal	G	C	0.0204707	0.32294	0.1
ENSG00000124614.13	RPS10	chr6_34437938_A_G_b38	rs9366856	2.5e-20	-0.17	Muscle - Skeletal	A	G	0.0184013	0.34609	0.1
ENSG00000124614.13	RPS10	chr6_34437155_C_T_b38	rs58525086	8.9e-11	0.23	Muscle - Skeletal	C	T	0.0354689	0.084136	0.1
ENSG00000124614.13	RPS10	chr6_34079360_G_C_b38	rs12527381	1.8e-05	0.096	Muscle - Skeletal	G	C	0.0223862	0.249665	0.1
ENSG00000124614.13	RPS10	chr6_34426624_C_G_b38	rs12662460	9.7e-05	0.17	Muscle - Skeletal	C	G	0.0436124	0.083737	0.1
ENSG00000142534.6	RPS11	chr19_49496390_C_G_b38	rs17555056	1.6e-40	-0.3	Muscle - Skeletal	C	G	0.0225097	0.204714	0.1
ENSG00000142534.6	RPS11	chr19_49543216_A_C_b38	rs1129460	2.3e-08	-0.15	Muscle - Skeletal	A	C	0.0268443	0.098977	0.1
ENSG00000142534.6	RPS11	chr19_49677009_C_G_b38	rs975484	7.1e-08	-0.1	Muscle - Skeletal	C	G	0.0185576	0.346178	0.1
ENSG00000142534.6	RPS11	chr19_49521293_C_T_b38	rs143785454	1.2e-06	-0.38	Muscle - Skeletal	C	T	0.0782595	0.003395	0.1
ENSG00000142534.6	RPS11	chr19_48900668_T_C_b38	rs45476398	1.2e-05	-0.27	Muscle - Skeletal	T	C	0.0616778	0.018684	0.1
ENSG00000112306.7	RPS12	chr6_132814902_C_G_b38	rs9493451	2.3e-06	-0.084	Muscle - Skeletal	C	G	0.0177774	0.365415	0.1
ENSG00000112306.7	RPS12	chr6_132809189_C_T_b38	rs62425114	4.3e-06	0.16	Muscle - Skeletal	C	T	0.0348104	0.058076	0.1
ENSG00000134419.15	RPS15A	chr16_18935695_G_A_b38	rs62044176	9.1e-16	0.15	Muscle - Skeletal	G	A	0.0186604	0.328527	0.1
ENSG00000134419.15	RPS15A	chr16_18862362_G_A_b38	rs117506357	0.00011	0.13	Muscle - Skeletal	G	A	0.0336143	0.083795	0.1
ENSG00000105193.8	RPS16	chr19_39435961_C_T_b38	rs640000	6.7e-171	0.57	Muscle - Skeletal	C	T	0.0204543	0.455599	0.1
ENSG00000105193.8	RPS16	chr19_39548046_G_C_b38	rs73040091	8.4e-16	0.38	Muscle - Skeletal	G	C	0.0472154	0.063055	0.1
ENSG00000105193.8	RPS16	chr19_39443465_C_A_b38	rs62120664	5.1e-12	-0.23	Muscle - Skeletal	C	A	0.03332	0.16092	0.1
ENSG00000105193.8	RPS16	chr19_39424004_G_A_b38	rs34350479	2e-10	0.31	Muscle - Skeletal	G	A	0.0487319	0.074359	0.1
ENSG00000105193.8	RPS16	chr19_39523002_A_G_b38	rs4803255	1.1e-09	0.16	Muscle - Skeletal	A	G	0.0262546	0.2287	0.1
ENSG00000105193.8	RPS16	chr19_39464875_C_T_b38	rs2304216	3e-07	-0.26	Muscle - Skeletal	C	T	0.0507471	0.056741	0.1
ENSG00000105193.8	RPS16	chr19_39427711_C_T_b38	rs78287148	3.4e-07	0.51	Muscle - Skeletal	C	T	0.100004	0.009107	0.1
ENSG00000105193.8	RPS16	chr19_39650709_G_C_b38	rs12609253	4.5e-07	0.13	Muscle - Skeletal	G	C	0.0257605	0.444834	0.1
ENSG00000105193.8	RPS16	chr19_39425093_C_T_b38	rs138077206	1.9e-06	0.36	Muscle - Skeletal	C	T	0.0755702	0.021159	0.1
ENSG00000105193.8	RPS16	chr19_39485403_C_G_b38	rs56145082	3.7e-06	0.35	Muscle - Skeletal	C	G	0.0756338	0.049365	0.1
ENSG00000105193.8	RPS16	chr19_39500563_A_G_b38	rs2304222	3.9e-06	0.29	Muscle - Skeletal	A	G	0.0628162	0.039552	0.1
ENSG00000105193.8	RPS16	chr19_39707046_G_C_b38	rs11671409	2.4e-05	-0.3	Muscle - Skeletal	G	C	0.0710227	0.026542	0.1
ENSG00000105193.8	RPS16	chr19_39623823_C_G_b38	rs10408981	4.3e-05	-0.11	Muscle - Skeletal	C	G	0.02689	0.442171	0.1
ENSG00000105193.8	RPS16	chr19_39336198_C_G_b38	rs251906	4.4e-05	0.18	Muscle - Skeletal	C	G	0.0440593	0.237832	0.1
ENSG00000105193.8	RPS16	chr19_39505707_T_C_b38	rs113883332	9.6e-05	-0.35	Muscle - Skeletal	T	C	0.0897324	0.013833	0.1
ENSG00000105193.8	RPS16	chr19_39522760_T_C_b38	rs149326047	0.0001	0.24	Muscle - Skeletal	T	C	0.0616873	0.033103	0.1
ENSG00000182774.10	RPS17	chr15_82592221_G_A_b38	rs34940771	5.8e-07	-0.099	Muscle - Skeletal	G	A	0.0198089	0.112237	0.1
ENSG00000182774.10	RPS17	chr15_82834705_T_C_b38	rs9806482	1.9e-06	0.062	Muscle - Skeletal	T	C	0.0130149	0.466061	0.1
ENSG00000182774.10	RPS17	chr15_82577381_A_G_b38	rs28582623	2.1e-05	0.068	Muscle - Skeletal	A	G	0.015985	0.20097	0.1
ENSG00000182774.10	RPS17	chr15_82155021_T_C_b38	rs141600894	0.00014	-0.18	Muscle - Skeletal	T	C	0.0472668	0.015412	0.1
ENSG00000231500.6	RPS18	chr6_33272092_C_T_b38	rs17215231	6.3e-101	-0.8	Muscle - Skeletal	C	T	0.0375101	0.052042	0.1
ENSG00000231500.6	RPS18	chr6_33284338_G_A_b38	rs455567	4.6e-13	0.17	Muscle - Skeletal	G	A	0.0234916	0.414612	0.1
ENSG00000231500.6	RPS18	chr6_33123280_C_T_b38	rs3117024	1.5e-09	-0.18	Muscle - Skeletal	C	T	0.0297798	0.188584	0.1
ENSG00000231500.6	RPS18	chr6_33651778_G_A_b38	rs79592126	1.1e-08	-0.51	Muscle - Skeletal	G	A	0.089246	0.01517	0.1
ENSG00000231500.6	RPS18	chr6_33766464_G_C_b38	rs145044106	5.2e-08	-0.49	Muscle - Skeletal	G	C	0.0900018	0.008986	0.1
ENSG00000231500.6	RPS18	chr6_33804091_G_A_b38	rs72896138	1.8e-07	-0.41	Muscle - Skeletal	G	A	0.0785608	0.01689	0.1
ENSG00000231500.6	RPS18	chr6_33773512_A_G_b38	rs6904716	3.3e-05	-0.094	Muscle - Skeletal	A	G	0.0226413	0.448657	0.1
ENSG00000231500.6	RPS18	chr6_33071848_T_C_b38	rs9277341	5.2e-05	0.1	Muscle - Skeletal	T	C	0.024713	0.418286	0.1
ENSG00000231500.6	RPS18	chr6_33551223_C_T_b38	rs210157	6.2e-05	-0.098	Muscle - Skeletal	C	T	0.024469	0.391636	0.1
ENSG00000105372.6	RPS19	chr19_41811775_T_C_b38	rs10419111	1.3e-05	-0.072	Muscle - Skeletal	T	C	0.0165134	0.479493	0.1
ENSG00000008988.9	RPS20	chr8_56043130_A_G_b38	rs72653948	1.3e-25	0.24	Muscle - Skeletal	A	G	0.0229416	0.169608	0.1
ENSG00000008988.9	RPS20	chr8_56117963_G_A_b38	rs142856921	1.2e-07	0.37	Muscle - Skeletal	G	A	0.0698971	0.011418	0.1
ENSG00000008988.9	RPS20	chr8_55707887_T_A_b38	rs113681805	1.3e-06	0.13	Muscle - Skeletal	T	A	0.0268609	0.1343	0.1
ENSG00000008988.9	RPS20	chr8_56142341_T_C_b38	rs6474049	0.00022	0.1	Muscle - Skeletal	T	C	0.0270646	0.173254	0.1
ENSG00000171858.17	RPS21	chr20_62388438_C_T_b38	rs6089356	6.6e-08	0.11	Muscle - Skeletal	C	T	0.0203638	0.177369	0.1
ENSG00000171858.17	RPS21	chr20_62104375_G_A_b38	rs60454884	6.3e-06	0.1	Muscle - Skeletal	G	A	0.0221432	0.106869	0.1
ENSG00000171858.17	RPS21	chr20_63263146_C_T_b38	rs76591422	1.5e-05	0.2	Muscle - Skeletal	C	T	0.0462034	0.032543	0.1
ENSG00000171858.17	RPS21	chr20_62338992_G_A_b38	rs6089349	5.1e-05	0.07	Muscle - Skeletal	G	A	0.0172797	0.456079	0.1
ENSG00000171858.17	RPS21	chr20_61924766_C_T_b38	rs2236070	5.1e-05	0.081	Muscle - Skeletal	C	T	0.0199951	0.165996	0.1
ENSG00000171858.17	RPS21	chr20_62203874_A_G_b38	rs141311291	5.4e-05	0.2	Muscle - Skeletal	A	G	0.0495343	0.015508	0.1
ENSG00000186468.12	RPS23	chr5_82273474_A_C_b38	rs3738	6.3e-72	-0.39	Muscle - Skeletal	A	C	0.0217453	0.32623	0.1
ENSG00000186468.12	RPS23	chr5_81946929_G_A_b38	rs10042896	5.8e-11	0.14	Muscle - Skeletal	G	A	0.021378	0.47224	0.1
ENSG00000186468.12	RPS23	chr5_82276077_A_G_b38	rs9099	2.1e-08	0.19	Muscle - Skeletal	A	G	0.033907	0.134385	0.1
ENSG00000186468.12	RPS23	chr5_81877446_C_T_b38	rs12658240	8.6e-07	0.13	Muscle - Skeletal	C	T	0.0264161	0.199281	0.1
ENSG00000186468.12	RPS23	chr5_82288339_C_T_b38	rs1963311	2.1e-06	0.15	Muscle - Skeletal	C	T	0.0316219	0.131303	0.1
ENSG00000186468.12	RPS23	chr5_82357662_C_T_b38	rs224912	2.1e-06	0.14	Muscle - Skeletal	C	T	0.0295137	0.152936	0.1
ENSG00000186468.12	RPS23	chr5_81849647_C_A_b38	rs11750053	1.9e-05	-0.11	Muscle - Skeletal	C	A	0.025723	0.24042	0.1
ENSG00000186468.12	RPS23	chr5_82609884_C_T_b38	rs77745910	2.6e-05	-0.14	Muscle - Skeletal	C	T	0.0332863	0.103382	0.1
ENSG00000186468.12	RPS23	chr5_82224148_C_T_b38	rs142256752	6.1e-05	-0.37	Muscle - Skeletal	C	T	0.0922944	0.005607	0.1
ENSG00000186468.12	RPS23	chr5_82349487_C_T_b38	rs6882993	8.2e-05	-0.14	Muscle - Skeletal	C	T	0.0355467	0.148959	0.1
ENSG00000186468.12	RPS23	chr5_82199153_T_A_b38	rs76894712	0.00013	0.12	Muscle - Skeletal	T	A	0.0313606	0.117647	0.1
ENSG00000186468.12	RPS23	chr5_81841586_A_G_b38	rs62366359	0.00017	0.28	Muscle - Skeletal	A	G	0.0744706	0.019796	0.1
ENSG00000138326.18	RPS24	chr10_78043435_C_T_b38	rs72642278	7e-23	-0.44	Muscle - Skeletal	C	T	0.0446796	0.040669	0.1
ENSG00000138326.18	RPS24	chr10_78033930_C_T_b38	rs3740253	8.3e-09	0.093	Muscle - Skeletal	C	T	0.0161395	0.476134	0.1
ENSG00000138326.18	RPS24	chr10_77810294_G_T_b38	rs73299466	1.9e-05	-0.15	Muscle - Skeletal	G	T	0.0350768	0.040535	0.1
ENSG00000118181.10	RPS25	chr11_119018422_A_G_b38	rs11217124	1.8e-33	-0.21	Muscle - Skeletal	A	G	0.0174185	0.29206	0.1
ENSG00000118181.10	RPS25	chr11_118773614_C_G_b38	rs6589695	5.8e-05	0.18	Muscle - Skeletal	C	G	0.0447672	0.0265	0.1
ENSG00000118181.10	RPS25	chr11_119539441_A_G_b38	rs11217307	7.3e-05	0.07	Muscle - Skeletal	A	G	0.0176487	0.46418	0.1
ENSG00000197728.9	RPS26	chr12_56007301_G_A_b38	rs10876864	5.4e-243	-0.95	Muscle - Skeletal	G	A	0.0285372	0.495485	0.1
ENSG00000197728.9	RPS26	chr12_56098201_A_G_b38	rs140116753	3e-13	0.59	Muscle - Skeletal	A	G	0.080884	0.038063	0.1
ENSG00000197728.9	RPS26	chr12_55967092_G_A_b38	rs2069398	2.4e-12	0.48	Muscle - Skeletal	G	A	0.0684832	0.124896	0.1
ENSG00000197728.9	RPS26	chr12_56189702_A_G_b38	rs11171773	6.7e-12	-0.48	Muscle - Skeletal	A	G	0.069931	0.226101	0.1
ENSG00000197728.9	RPS26	chr12_56001636_T_A_b38	rs773126	9.4e-11	0.26	Muscle - Skeletal	T	A	0.0401464	0.369721	0.1
ENSG00000197728.9	RPS26	chr12_56017922_G_A_b38	rs117396149	3e-10	0.63	Muscle - Skeletal	G	A	0.100019	0.026158	0.1
ENSG00000197728.9	RPS26	chr12_56116134_G_C_b38	rs144131441	5.8e-10	-0.46	Muscle - Skeletal	G	C	0.0742442	0.049579	0.1
ENSG00000197728.9	RPS26	chr12_55866386_C_G_b38	rs4417323	8.7e-08	0.25	Muscle - Skeletal	C	G	0.0467117	0.188984	0.1
ENSG00000197728.9	RPS26	chr12_56020730_C_T_b38	rs75143485	1.5e-07	0.67	Muscle - Skeletal	C	T	0.127557	0.022397	0.1
ENSG00000197728.9	RPS26	chr12_56177027_G_A_b38	rs150823486	2.1e-07	-0.45	Muscle - Skeletal	G	A	0.0867008	0.045469	0.1
ENSG00000197728.9	RPS26	chr12_56216069_C_T_b38	rs71459348	4.8e-07	-0.62	Muscle - Skeletal	C	T	0.123159	0.022554	0.1
ENSG00000197728.9	RPS26	chr12_56007149_A_C_b38	rs141635677	7.2e-07	-0.6	Muscle - Skeletal	A	C	0.121068	0.011981	0.1
ENSG00000197728.9	RPS26	chr12_56109343_G_C_b38	rs11171744	9.9e-07	-0.32	Muscle - Skeletal	G	C	0.0653913	0.092302	0.1
ENSG00000197728.9	RPS26	chr12_55877049_T_C_b38	rs7484392	2.8e-06	-0.44	Muscle - Skeletal	T	C	0.0939173	0.048611	0.1
ENSG00000197728.9	RPS26	chr12_56284557_C_T_b38	rs11614512	5.1e-06	0.3	Muscle - Skeletal	C	T	0.0657804	0.073322	0.1
ENSG00000197728.9	RPS26	chr12_56099237_T_G_b38	rs118067691	1.4e-05	0.45	Muscle - Skeletal	T	G	0.103594	0.026594	0.1
ENSG00000197728.9	RPS26	chr12_56461151_C_A_b38	rs183425427	1.7e-05	0.81	Muscle - Skeletal	C	A	0.188327	0.011461	0.1
ENSG00000197728.9	RPS26	chr12_56445528_C_T_b38	rs61937720	3e-05	-0.17	Muscle - Skeletal	C	T	0.0407335	0.347442	0.1
ENSG00000197728.9	RPS26	chr12_56465979_G_A_b38	rs143572577	0.00013	0.56	Muscle - Skeletal	G	A	0.146349	0.010731	0.1
ENSG00000197728.9	RPS26	chr12_56420779_G_A_b38	rs66491720	0.00013	0.23	Muscle - Skeletal	G	A	0.0601078	0.103424	0.1
ENSG00000197728.9	RPS26	chr12_56030921_C_T_b38	rs11613544	0.00013	0.6	Muscle - Skeletal	C	T	0.156803	0.014146	0.1
ENSG00000197728.9	RPS26	chr12_55667056_G_C_b38	rs149874092	0.00017	0.2	Muscle - Skeletal	G	C	0.0531933	0.127796	0.1
ENSG00000197728.9	RPS26	chr12_55902635_G_T_b38	rs112244905	0.00018	-0.47	Muscle - Skeletal	G	T	0.125482	0.02317	0.1
ENSG00000185088.13	RPS27L	chr15_63151769_A_C_b38	rs28394803	5.2e-10	-0.19	Muscle - Skeletal	A	C	0.0305813	0.16185	0.1
ENSG00000185088.13	RPS27L	chr15_62269782_G_A_b38	rs2037276	0.00014	-0.087	Muscle - Skeletal	G	A	0.0228456	0.292339	0.1
ENSG00000233927.4	RPS28	chr19_8322323_G_A_b38	rs1057232	2e-36	-0.24	Muscle - Skeletal	G	A	0.0190412	0.41518	0.1
ENSG00000233927.4	RPS28	chr19_8302030_G_A_b38	rs173665	1.2e-09	0.2	Muscle - Skeletal	G	A	0.0328934	0.107111	0.1
ENSG00000233927.4	RPS28	chr19_8343160_G_C_b38	rs117833207	4e-05	-0.18	Muscle - Skeletal	G	C	0.0438225	0.027157	0.1
ENSG00000233927.4	RPS28	chr19_8135524_T_C_b38	rs28771971	8.8e-05	-0.086	Muscle - Skeletal	T	C	0.0219304	0.367523	0.1
ENSG00000168028.13	RPSA	chr3_39407090_T_G_b38	rs3772143	4e-43	-0.28	Muscle - Skeletal	T	G	0.0203378	0.491733	0.1
ENSG00000168028.13	RPSA	chr3_39388404_G_C_b38	rs116547500	4.1e-12	-0.4	Muscle - Skeletal	G	C	0.0576893	0.01699	0.1
ENSG00000168028.13	RPSA	chr3_39181019_T_G_b38	rs114584454	4.8e-09	-0.16	Muscle - Skeletal	T	G	0.0273319	0.192964	0.1
ENSG00000168028.13	RPSA	chr3_39231814_A_G_b38	rs73058528	3.6e-06	0.11	Muscle - Skeletal	A	G	0.0237415	0.169728	0.1
ENSG00000168028.13	RPSA	chr3_39500645_G_A_b38	rs7616236	4e-06	-0.14	Muscle - Skeletal	G	A	0.0303597	0.115954	0.1
ENSG00000168028.13	RPSA	chr3_39385601_C_T_b38	rs76664897	4.3e-05	0.22	Muscle - Skeletal	C	T	0.05378	0.04399	0.1
ENSG00000168028.13	RPSA	chr3_39263327_G_A_b38	rs9826296	6.5e-05	-0.13	Muscle - Skeletal	G	A	0.0325498	0.165328	0.1
ENSG00000168028.13	RPSA	chr3_39232314_G_A_b38	rs4016657	6.8e-05	-0.26	Muscle - Skeletal	G	A	0.0652745	0.035748	0.1
ENSG00000168028.13	RPSA	chr3_39236676_A_G_b38	rs62244208	7.1e-05	0.12	Muscle - Skeletal	A	G	0.0302046	0.20058	0.1
ENSG00000168028.13	RPSA	chr3_39683197_A_G_b38	rs112721139	8e-05	-0.28	Muscle - Skeletal	A	G	0.0709867	0.015031	0.1
ENSG00000168028.13	RPSA	chr3_39267724_C_T_b38	rs17793056	0.00013	0.084	Muscle - Skeletal	C	T	0.0219524	0.463702	0.1
ENSG00000204628.11	RACK1	chr5_181240048_C_A_b38	rs2771000	4.3e-11	-0.16	Muscle - Skeletal	C	A	0.0242669	0.150443	0.1
ENSG00000204628.11	RACK1	chr5_181237105_C_G_b38	rs2770995	8.9e-07	-0.19	Muscle - Skeletal	C	G	0.0386609	0.151982	0.1
ENSG00000198034.10	RPS4X	chrX_72278498_G_A_b38	rs5958831	4.9e-05	0.074	Muscle - Skeletal	G	A	0.018225	0.456265	0.1
ENSG00000147403.16	RPL10	chrX_154398804_A_C_b38	rs11593	9.5e-41	-0.29	Muscle - Skeletal	A	C	0.0216962	0.298277	0.1
ENSG00000116251.9	RPL22	chr1_6131071_G_C_b38	rs17029186	4.3e-05	0.23	Muscle - Skeletal	G	C	0.0562246	0.088921	0.1
ENSG00000109475.16	RPL34	chr4_108620566_C_CT_b38	rs139552732	7.5e-12	-0.47	Muscle - Skeletal	C	CT	0.0686353	0.02416	0.1
ENSG00000229117.8	RPL41	chr12_57108347_G_A_b38	rs3024950	1.9e-05	0.37	Muscle - Skeletal	G	A	0.0865228	0.027958	0.1

## Sheet: RPs Liver subset
Function in longevity in yeast or worms
Gencode	Gene	Variant.Id	SNP	PVal	beta	Tissue	other_allele	effect_allele	se	eaf	LDthreshold
ENSG00000171863.12	RPS7	chr2_3608153_C_T_b38	rs4850068	3.5e-06	-0.22	Liver	C	T	0.0474234	0.401926	0.1
ENSG00000171863.12	RPS7	chr2_3586327_T_C_b38	rs11684944	7.1e-06	0.21	Liver	T	C	0.0467636	0.415583	0.1
ENSG00000231500.6	RPS18	chr6_33272092_C_T_b38	rs17215231	2.4e-12	-0.57	Liver	C	T	0.0813238	0.052042	0.1
ENSG00000186468.12	RPS23	chr5_82289207_G_T_b38	rs226194	4.5e-12	0.32	Liver	G	T	0.0462393	0.307222	0.1
ENSG00000186468.12	RPS23	chr5_81479731_C_T_b38	rs146031396	4.9e-05	-0.51	Liver	C	T	0.125605	0.019718	0.1
ENSG00000197728.9	RPS26	chr12_56042145_C_G_b38	rs1131017	1.8e-59	-1	Liver	C	G	0.0614884	0.444089	0.1
ENSG00000233927.4	RPS28	chr19_8329208_T_C_b38	rs2972574	8.1e-16	-0.41	Liver	T	C	0.0509147	0.411701	0.1
ENSG00000168028.13	RPSA	chr3_39387163_C_G_b38	rs56713196	2.5e-09	-0.36	Liver	C	G	0.0603879	0.13783	0.1
ENSG00000174444.14	RPL4	chr15_66525207_G_A_b38	rs12911848	3.7e-06	0.2	Liver	G	A	0.0432193	0.357439	0.1
ENSG00000146223.14	RPL7L1	chr6_42888764_T_G_b38	rs9462844	8.8e-06	-0.17	Liver	T	G	0.0382475	0.304548	0.1
ENSG00000163682.15	RPL9	chr4_39448204_G_A_b38	rs2687967	1.7e-30	-0.71	Liver	G	A	0.061857	0.351855	0.1
ENSG00000163682.15	RPL9	chr4_39546862_C_T_b38	rs2608822	7.5e-07	-0.63	Liver	C	T	0.127326	0.096846	0.1
ENSG00000163682.15	RPL9	chr4_39397005_T_C_b38	rs6857705	3.6e-06	0.31	Liver	T	C	0.0669079	0.467789	0.1
ENSG00000197958.12	RPL12	chr9_127432216_C_T_b38	rs4400487	1.2e-09	0.26	Liver	C	T	0.0427614	0.409701	0.1
ENSG00000108298.9	RPL19	chr17_39648099_T_C_b38	rs12103674	1.2e-05	0.25	Liver	T	C	0.0571091	0.140237	0.1
ENSG00000198034.10	RPS4X	chrX_72320099_C_T_b38	rs73624231	2.8e-05	0.52	Liver	C	T	0.12413	0.028369	0.1
ENSG00000164587.11	RPS14	chr5_149900522_T_C_b38	rs76732689	4.3e-06	0.93	Liver	T	C	0.202335	0.04575	0.1
ENSG00000163584.17	RPL22L1	chr3_171116995_A_G_b38	rs6444961	4.3e-08	-0.74	Liver	A	G	0.135084	0.112882	0.1
ENSG00000145592.13	RPL37	chr5_41058881_C_T_b38	rs112541965	1.2e-05	-0.92	Liver	C	T	0.210161	0.039092	0.1
