# Supplementary material for: Mendelian randomization analyses implicate biogenesis of translation machinery in human aging
Source: Genome Res. 2022 Feb;32(2):258–65. doi: 10.1101/gr.275636.121 (PMC8805714; doi:10.1101/gr.275636.121)
Supplement: Supplemental Material [file supp_gr.275636.121_Supplemental_Table_S5.xlsx]

## Sheet: Legend
This document contains all the harmonised data for all the longevity MR analyses performed.
Data for each complex (Pol I, II, III -specific subunits and ribosomal proteins) are given in separate tabs for clarity. Within each tab, the data are separated by exposure (tissue expression) and outcome (90th or 99th percentile longevity).

## Sheet: Pol III
Adipose Visceral-Longevity 90p
SNP	effect_allele.exposure	other_allele.exposure	effect_allele.outcome	other_allele.outcome	beta.exposure	beta.outcome	eaf.exposure	eaf.outcome	remove	palindromic	ambiguous	id.outcome	se.outcome	pval.outcome	samplesize.outcome	outcome	mr_keep.outcome	pval_origin.outcome	data_source.outcome	gene.exposure	pval.exposure	se.exposure	exposure	mr_keep.exposure	pval_origin.exposure	id.exposure	data_source.exposure	action	mr_keep
rs10035307	T	C	T	C	-0.19	0.0108	0.485531	0.4	FALSE	FALSE	FALSE	xIt72W	0.02	0.5894	11050	outcome	TRUE	reported	textfile	POLR3G	8.4e-06	0.0426513	exposure	TRUE	reported	OTk8LG	textfile	2	TRUE
rs115243157	C	T	C	T	0.36	-0.2165	0.011178	0.01	FALSE	FALSE	FALSE	xIt72W	0.13	0.09595	7407	outcome	TRUE	reported	textfile	POLR3C	1.6e-05	0.0834405	exposure	TRUE	reported	OTk8LG	textfile	2	TRUE
rs11912852	T	G	T	G	0.15	-0.0441	0.244813	0.29	FALSE	FALSE	FALSE	xIt72W	0.0214	0.03922	11615	outcome	TRUE	reported	textfile	POLR3H	1.4e-14	0.0194897	exposure	TRUE	reported	OTk8LG	textfile	2	TRUE
rs1421444	C	T	C	T	0.1	-0.0142	0.487309	0.54	FALSE	FALSE	FALSE	xIt72W	0.0191	0.4577	11615	outcome	TRUE	reported	textfile	POLR3B	1.5e-05	0.0231017	exposure	TRUE	reported	OTk8LG	textfile	2	TRUE
rs2267443	G	A	G	A	-0.072	0.0309	0.345544	0.61	FALSE	FALSE	FALSE	xIt72W	0.021	0.1402	11050	outcome	TRUE	reported	textfile	POLR3H	0.00011	0.0186171	exposure	TRUE	reported	OTk8LG	textfile	2	TRUE
rs2269658	C	T	C	T	-0.11	0.0235	0.232846	0.14	FALSE	FALSE	FALSE	xIt72W	0.0279	0.3995	11615	outcome	TRUE	reported	textfile	POLR3H	1.4e-06	0.0227979	exposure	TRUE	reported	OTk8LG	textfile	2	TRUE
rs2541593	A	C	A	C	0.15	-0.006	0.213097	0.81	FALSE	FALSE	FALSE	xIt72W	0.0263	0.8192	11075	outcome	TRUE	reported	textfile	POLR3K	4.8e-06	0.0327988	exposure	TRUE	reported	OTk8LG	textfile	2	TRUE
rs5758386	A	G	A	G	-0.18	0.0797	0.178868	0.01	FALSE	FALSE	FALSE	xIt72W	0.1177	0.4982	8442	outcome	TRUE	reported	textfile	POLR3H	3e-05	0.0431296	exposure	TRUE	reported	OTk8LG	textfile	2	TRUE
rs62470944	A	G	A	G	0.56	-0.0412	0.039757	0.05	FALSE	FALSE	FALSE	xIt72W	0.0472	0.3826	11615	outcome	TRUE	reported	textfile	CRCP	2.2e-08	0.100081	exposure	TRUE	reported	OTk8LG	textfile	2	TRUE
rs6898209	C	T	C	T	-0.21	0.0159	0.288134	0.65	FALSE	FALSE	FALSE	xIt72W	0.0204	0.4368	11050	outcome	TRUE	reported	textfile	POLR3G	4.2e-06	0.0456399	exposure	TRUE	reported	OTk8LG	textfile	2	TRUE
rs7839390	T	C	T	C	-0.16	0.0247	0.070972	0.04	FALSE	FALSE	FALSE	xIt72W	0.0483	0.6085	11615	outcome	TRUE	reported	textfile	POLR3D	5.6e-05	0.0397115	exposure	TRUE	reported	OTk8LG	textfile	2	TRUE
rs801207	C	T	C	T	0.15	-0.0254	0.46538	0.51	FALSE	FALSE	FALSE	xIt72W	0.0197	0.1971	11615	outcome	TRUE	reported	textfile	CRCP	9.4e-05	0.0384066	exposure	TRUE	reported	OTk8LG	textfile	2	TRUE
rs8051696	C	G	C	G	0.27	-0.0395	0.187803	0.19	FALSE	TRUE	FALSE	xIt72W	0.0305	0.1953	10510	outcome	TRUE	reported	textfile	POLR3K	2.4e-17	0.0318675	exposure	TRUE	reported	OTk8LG	textfile	2	TRUE
Adipose Visceral-Longevity 99p
SNP	effect_allele.exposure	other_allele.exposure	effect_allele.outcome	other_allele.outcome	beta.exposure	beta.outcome	eaf.exposure	eaf.outcome	remove	palindromic	ambiguous	id.outcome	se.outcome	pval.outcome	samplesize.outcome	outcome	mr_keep.outcome	pval_origin.outcome	data_source.outcome	gene.exposure	pval.exposure	se.exposure	exposure	mr_keep.exposure	pval_origin.exposure	id.exposure	data_source.exposure	action	mr_keep
rs10035307	T	C	T	C	-0.19	0.0121	0.485531	0.4	FALSE	FALSE	FALSE	3tJzSh	0.0324	0.7085	4154	outcome	TRUE	reported	textfile	POLR3G	8.4e-06	0.0426513	exposure	TRUE	reported	jaU3tW	textfile	2	TRUE
rs11912852	T	G	T	G	0.15	-0.0267	0.244813	0.29	FALSE	FALSE	FALSE	3tJzSh	0.0334	0.4245	4524	outcome	TRUE	reported	textfile	POLR3H	1.4e-14	0.0194897	exposure	TRUE	reported	jaU3tW	textfile	2	TRUE
rs1421444	C	T	C	T	0.1	-0.0367	0.487309	0.54	FALSE	FALSE	FALSE	3tJzSh	0.0299	0.2193	4524	outcome	TRUE	reported	textfile	POLR3B	1.5e-05	0.0231017	exposure	TRUE	reported	jaU3tW	textfile	2	TRUE
rs2267443	G	A	G	A	-0.072	0.0462	0.345544	0.6	FALSE	FALSE	FALSE	3tJzSh	0.034	0.1745	4154	outcome	TRUE	reported	textfile	POLR3H	0.00011	0.0186171	exposure	TRUE	reported	jaU3tW	textfile	2	TRUE
rs2269658	C	T	C	T	-0.11	-0.006	0.232846	0.14	FALSE	FALSE	FALSE	3tJzSh	0.0436	0.8914	4524	outcome	TRUE	reported	textfile	POLR3H	1.4e-06	0.0227979	exposure	TRUE	reported	jaU3tW	textfile	2	TRUE
rs2541593	A	C	A	C	0.15	-0.0009	0.213097	0.82	FALSE	FALSE	FALSE	3tJzSh	0.0403	0.9831	4524	outcome	TRUE	reported	textfile	POLR3K	4.8e-06	0.0327988	exposure	TRUE	reported	jaU3tW	textfile	2	TRUE
rs62470944	A	G	A	G	0.56	0.1564	0.039757	0.04	FALSE	FALSE	FALSE	3tJzSh	0.0759	0.03952	4182	outcome	TRUE	reported	textfile	CRCP	2.2e-08	0.100081	exposure	TRUE	reported	jaU3tW	textfile	2	TRUE
rs6898209	C	T	C	T	-0.21	0.0335	0.288134	0.65	FALSE	FALSE	FALSE	3tJzSh	0.0333	0.3149	4154	outcome	TRUE	reported	textfile	POLR3G	4.2e-06	0.0456399	exposure	TRUE	reported	jaU3tW	textfile	2	TRUE
rs7839390	T	C	T	C	-0.16	0.1014	0.070972	0.05	FALSE	FALSE	FALSE	3tJzSh	0.0741	0.1709	4303	outcome	TRUE	reported	textfile	POLR3D	5.6e-05	0.0397115	exposure	TRUE	reported	jaU3tW	textfile	2	TRUE
rs801207	C	T	C	T	0.15	0.0003	0.46538	0.51	FALSE	FALSE	FALSE	3tJzSh	0.0308	0.9921	4524	outcome	TRUE	reported	textfile	CRCP	9.4e-05	0.0384066	exposure	TRUE	reported	jaU3tW	textfile	2	TRUE
rs8051696	C	G	C	G	0.27	-0.0507	0.187803	0.19	FALSE	TRUE	FALSE	3tJzSh	0.0502	0.3127	4154	outcome	TRUE	reported	textfile	POLR3K	2.4e-17	0.0318675	exposure	TRUE	reported	jaU3tW	textfile	2	TRUE
Pancreas-Longevity 90p
SNP	effect_allele.exposure	other_allele.exposure	effect_allele.outcome	other_allele.outcome	beta.exposure	beta.outcome	eaf.exposure	eaf.outcome	remove	palindromic	ambiguous	id.outcome	se.outcome	pval.outcome	samplesize.outcome	outcome	mr_keep.outcome	pval_origin.outcome	data_source.outcome	gene.exposure	pval.exposure	se.exposure	exposure	mr_keep.exposure	pval_origin.exposure	id.exposure	data_source.exposure	action	mr_keep
rs1088640	T	C	T	C	0.25	-0.037	0.449467	0.38	FALSE	FALSE	FALSE	GzO4ir	0.0251	0.1404	10510	outcome	TRUE	reported	textfile	POLR3K	4.7e-06	0.054612	exposure	TRUE	reported	Cif0Lf	textfile	2	TRUE
rs13055891	A	G	A	G	0.25	-0.0409	0.291104	0.35	FALSE	FALSE	FALSE	GzO4ir	0.0207	0.04825	11615	outcome	TRUE	reported	textfile	POLR3H	1.6e-05	0.0579448	exposure	TRUE	reported	Cif0Lf	textfile	2	TRUE
rs28565886	C	T	C	T	0.21	0.0092	0.315318	0.21	FALSE	FALSE	FALSE	GzO4ir	0.0238	0.6989	11615	outcome	TRUE	reported	textfile	CRCP	7.3e-06	0.0468254	exposure	TRUE	reported	Cif0Lf	textfile	2	TRUE
rs6111696	C	T	C	T	-0.94	0.0393	0.045921	0.03	FALSE	FALSE	FALSE	GzO4ir	0.0648	0.5441	10454	outcome	TRUE	reported	textfile	POLR3F	4.1e-05	0.229169	exposure	TRUE	reported	Cif0Lf	textfile	2	TRUE
rs6897910	A	G	A	G	0.3	-0.0067	0.378948	0.41	FALSE	FALSE	FALSE	GzO4ir	0.0199	0.736	11050	outcome	TRUE	reported	textfile	POLR3G	2.2e-05	0.0706953	exposure	TRUE	reported	Cif0Lf	textfile	2	TRUE
Pancreas-Longevity 99p
SNP	effect_allele.exposure	other_allele.exposure	effect_allele.outcome	other_allele.outcome	beta.exposure	beta.outcome	eaf.exposure	eaf.outcome	remove	palindromic	ambiguous	id.outcome	se.outcome	pval.outcome	samplesize.outcome	outcome	mr_keep.outcome	pval_origin.outcome	data_source.outcome	gene.exposure	pval.exposure	se.exposure	exposure	mr_keep.exposure	pval_origin.exposure	id.exposure	data_source.exposure	action	mr_keep
rs1088640	T	C	T	C	0.25	-0.0648	0.449467	0.38	FALSE	FALSE	FALSE	MO9vMB	0.0406	0.1101	4154	outcome	TRUE	reported	textfile	POLR3K	4.7e-06	0.054612	exposure	TRUE	reported	Cif0Lf	textfile	2	TRUE
rs13055891	A	G	A	G	0.25	-0.0104	0.291104	0.35	FALSE	FALSE	FALSE	MO9vMB	0.0321	0.7458	4524	outcome	TRUE	reported	textfile	POLR3H	1.6e-05	0.0579448	exposure	TRUE	reported	Cif0Lf	textfile	2	TRUE
rs28565886	C	T	C	T	0.21	0.0681	0.315318	0.21	FALSE	FALSE	FALSE	MO9vMB	0.0372	0.06676	4524	outcome	TRUE	reported	textfile	CRCP	7.3e-06	0.0468254	exposure	TRUE	reported	Cif0Lf	textfile	2	TRUE
rs6111696	C	T	C	T	-0.94	0.0875	0.045921	0.03	FALSE	FALSE	FALSE	MO9vMB	0.1115	0.4326	3545	outcome	TRUE	reported	textfile	POLR3F	4.1e-05	0.229169	exposure	TRUE	reported	Cif0Lf	textfile	2	TRUE
rs6897910	A	G	A	G	0.3	-0.0103	0.378948	0.41	FALSE	FALSE	FALSE	MO9vMB	0.0324	0.7493	4154	outcome	TRUE	reported	textfile	POLR3G	2.2e-05	0.0706953	exposure	TRUE	reported	Cif0Lf	textfile	2	TRUE
Small intestine-Longevity 90p
SNP	effect_allele.exposure	other_allele.exposure	effect_allele.outcome	other_allele.outcome	beta.exposure	beta.outcome	eaf.exposure	eaf.outcome	remove	palindromic	ambiguous	id.outcome	se.outcome	pval.outcome	samplesize.outcome	outcome	mr_keep.outcome	pval_origin.outcome	data_source.outcome	gene.exposure	pval.exposure	se.exposure	exposure	mr_keep.exposure	pval_origin.exposure	id.exposure	data_source.exposure	action	mr_keep
rs113492601	G	A	G	A	-0.91	0.089	0.018911	0.04	FALSE	FALSE	FALSE	jmJFg5	0.0797	0.2643	5844	outcome	TRUE	reported	textfile	CRCP	2.5e-05	0.215906	exposure	TRUE	reported	UyTxvD	textfile	2	TRUE
rs154572	G	C	G	C	0.31	0.0108	0.464457	0.46	FALSE	TRUE	TRUE	jmJFg5	0.0197	0.5816	11050	outcome	TRUE	reported	textfile	POLR3G	8.5e-07	0.0629631	exposure	TRUE	reported	UyTxvD	textfile	2	FALSE
rs5758762	A	G	A	G	-0.34	0.0431	0.183111	0.07	FALSE	FALSE	FALSE	jmJFg5	0.05	0.3884	10048	outcome	TRUE	reported	textfile	POLR3H	5.8e-05	0.0845602	exposure	TRUE	reported	UyTxvD	textfile	2	TRUE
Small intestine-Longevity 99p
SNP	effect_allele.exposure	other_allele.exposure	effect_allele.outcome	other_allele.outcome	beta.exposure	beta.outcome	eaf.exposure	eaf.outcome	remove	palindromic	ambiguous	id.outcome	se.outcome	pval.outcome	samplesize.outcome	outcome	mr_keep.outcome	pval_origin.outcome	data_source.outcome	gene.exposure	pval.exposure	se.exposure	exposure	mr_keep.exposure	pval_origin.exposure	id.exposure	data_source.exposure	action	mr_keep
rs113492601	G	A	G	A	-0.91	0.3522	0.018911	0.04	FALSE	FALSE	FALSE	8wdfJS	0.1187	0.003006	2396	outcome	TRUE	reported	textfile	CRCP	2.5e-05	0.215906	exposure	TRUE	reported	UyTxvD	textfile	2	TRUE
rs154572	G	C	G	C	0.31	-0.0046	0.464457	0.46	FALSE	TRUE	TRUE	8wdfJS	0.0319	0.8859	4154	outcome	TRUE	reported	textfile	POLR3G	8.5e-07	0.0629631	exposure	TRUE	reported	UyTxvD	textfile	2	FALSE
rs5758762	A	G	A	G	-0.34	-0.0372	0.183111	0.07	FALSE	FALSE	FALSE	8wdfJS	0.0831	0.6542	3812	outcome	TRUE	reported	textfile	POLR3H	5.8e-05	0.0845602	exposure	TRUE	reported	UyTxvD	textfile	2	TRUE
Colon transverse-Longevity 90p
SNP	effect_allele.exposure	other_allele.exposure	effect_allele.outcome	other_allele.outcome	beta.exposure	beta.outcome	eaf.exposure	eaf.outcome	remove	palindromic	ambiguous	id.outcome	se.outcome	pval.outcome	samplesize.outcome	outcome	mr_keep.outcome	pval_origin.outcome	data_source.outcome	gene.exposure	pval.exposure	se.exposure	exposure	mr_keep.exposure	pval_origin.exposure	id.exposure	data_source.exposure	action	mr_keep
rs10797655	A	G	A	G	-0.11	-0.0216	0.423522	0.41	FALSE	FALSE	FALSE	R1EjyQ	0.0204	0.2887	11615	outcome	TRUE	reported	textfile	POLR3GL	5e-05	0.0271228	exposure	TRUE	reported	TODDGN	textfile	2	TRUE
rs12534263	A	G	A	G	0.63	-0.0395	0.041579	0.05	FALSE	FALSE	FALSE	R1EjyQ	0.0469	0.3995	11615	outcome	TRUE	reported	textfile	CRCP	6.3e-08	0.116449	exposure	TRUE	reported	TODDGN	textfile	2	TRUE
rs13053356	T	C	T	C	0.11	-0.0406	0.18593	0.24	FALSE	FALSE	FALSE	R1EjyQ	0.0231	0.07941	11615	outcome	TRUE	reported	textfile	POLR3H	2.8e-05	0.0262583	exposure	TRUE	reported	TODDGN	textfile	2	TRUE
rs13336074	T	C	T	C	0.3	0.079	0.070432	0.04	FALSE	FALSE	FALSE	R1EjyQ	0.066	0.2312	9258	outcome	TRUE	reported	textfile	POLR3K	7.8e-05	0.0759405	exposure	TRUE	reported	TODDGN	textfile	2	TRUE
rs143741293	G	C	G	C	0.51	-0.1243	0.013003	0.02	FALSE	TRUE	FALSE	R1EjyQ	0.1181	0.2923	5989	outcome	TRUE	reported	textfile	POLR3K	7.5e-05	0.128793	exposure	TRUE	reported	TODDGN	textfile	2	TRUE
rs2541604	G	A	G	A	0.14	0.0087	0.360393	0.39	FALSE	FALSE	FALSE	R1EjyQ	0.0225	0.6994	11050	outcome	TRUE	reported	textfile	POLR3K	3.9e-05	0.0340357	exposure	TRUE	reported	TODDGN	textfile	2	TRUE
rs5758324	T	G	T	G	-0.14	0.0297	0.382178	0.22	FALSE	FALSE	FALSE	R1EjyQ	0.0232	0.2009	11615	outcome	TRUE	reported	textfile	POLR3H	4.6e-07	0.0277652	exposure	TRUE	reported	TODDGN	textfile	2	TRUE
rs6957031	C	T	C	T	-0.19	-0.0018	0.217753	0.25	FALSE	FALSE	FALSE	R1EjyQ	0.0252	0.9418	11050	outcome	TRUE	reported	textfile	CRCP	6.5e-05	0.0475727	exposure	TRUE	reported	TODDGN	textfile	2	TRUE
rs72781084	G	A	G	A	0.33	-0.0076	0.17998	0.23	FALSE	FALSE	FALSE	R1EjyQ	0.0243	0.7531	11050	outcome	TRUE	reported	textfile	POLR3G	4.8e-10	0.0530077	exposure	TRUE	reported	TODDGN	textfile	2	TRUE
rs77046488	G	A	G	A	0.33	-0.0435	0.189639	0.19	FALSE	FALSE	FALSE	R1EjyQ	0.0308	0.1578	10510	outcome	TRUE	reported	textfile	POLR3K	9.1e-20	0.0362669	exposure	TRUE	reported	TODDGN	textfile	2	TRUE
Colon transverse-Longevity 99p
SNP	effect_allele.exposure	other_allele.exposure	effect_allele.outcome	other_allele.outcome	beta.exposure	beta.outcome	eaf.exposure	eaf.outcome	remove	palindromic	ambiguous	id.outcome	se.outcome	pval.outcome	samplesize.outcome	outcome	mr_keep.outcome	pval_origin.outcome	data_source.outcome	gene.exposure	pval.exposure	se.exposure	exposure	mr_keep.exposure	pval_origin.exposure	id.exposure	data_source.exposure	action	mr_keep
rs10797655	A	G	A	G	-0.11	-0.0241	0.423522	0.42	FALSE	FALSE	FALSE	DQWfVE	0.0319	0.4503	4524	outcome	TRUE	reported	textfile	POLR3GL	5e-05	0.0271228	exposure	TRUE	reported	TODDGN	textfile	2	TRUE
rs12534263	A	G	A	G	0.63	0.1348	0.041579	0.05	FALSE	FALSE	FALSE	DQWfVE	0.0771	0.08041	4182	outcome	TRUE	reported	textfile	CRCP	6.3e-08	0.116449	exposure	TRUE	reported	TODDGN	textfile	2	TRUE
rs13053356	T	C	T	C	0.11	-0.0086	0.18593	0.24	FALSE	FALSE	FALSE	DQWfVE	0.0364	0.8143	4524	outcome	TRUE	reported	textfile	POLR3H	2.8e-05	0.0262583	exposure	TRUE	reported	TODDGN	textfile	2	TRUE
rs13336074	T	C	T	C	0.3	0.1155	0.070432	0.04	FALSE	FALSE	FALSE	DQWfVE	0.096	0.2286	3692	outcome	TRUE	reported	textfile	POLR3K	7.8e-05	0.0759405	exposure	TRUE	reported	TODDGN	textfile	2	TRUE
rs2541604	G	A	G	A	0.14	0.0384	0.360393	0.4	FALSE	FALSE	FALSE	DQWfVE	0.0359	0.2842	4154	outcome	TRUE	reported	textfile	POLR3K	3.9e-05	0.0340357	exposure	TRUE	reported	TODDGN	textfile	2	TRUE
rs5758324	T	G	T	G	-0.14	0.0196	0.382178	0.23	FALSE	FALSE	FALSE	DQWfVE	0.0364	0.5897	4524	outcome	TRUE	reported	textfile	POLR3H	4.6e-07	0.0277652	exposure	TRUE	reported	TODDGN	textfile	2	TRUE
rs6957031	C	T	C	T	-0.19	-0.0209	0.217753	0.24	FALSE	FALSE	FALSE	DQWfVE	0.0407	0.6082	4154	outcome	TRUE	reported	textfile	CRCP	6.5e-05	0.0475727	exposure	TRUE	reported	TODDGN	textfile	2	TRUE
rs72781084	G	A	G	A	0.33	-0.035	0.17998	0.22	FALSE	FALSE	FALSE	DQWfVE	0.0395	0.3754	4154	outcome	TRUE	reported	textfile	POLR3G	4.8e-10	0.0530077	exposure	TRUE	reported	TODDGN	textfile	2	TRUE
rs77046488	G	A	G	A	0.33	-0.0495	0.189639	0.19	FALSE	FALSE	FALSE	DQWfVE	0.051	0.3312	4154	outcome	TRUE	reported	textfile	POLR3K	9.1e-20	0.0362669	exposure	TRUE	reported	TODDGN	textfile	2	TRUE
Muscle skeletal-Longevity 90p
SNP	effect_allele.exposure	other_allele.exposure	effect_allele.outcome	other_allele.outcome	beta.exposure	beta.outcome	eaf.exposure	eaf.outcome	remove	palindromic	ambiguous	id.outcome	se.outcome	pval.outcome	samplesize.outcome	outcome	mr_keep.outcome	pval_origin.outcome	data_source.outcome	gene.exposure	pval.exposure	se.exposure	exposure	mr_keep.exposure	pval_origin.exposure	id.exposure	data_source.exposure	action	mr_keep
rs10797655	A	G	A	G	0.092	-0.0216	0.423522	0.41	FALSE	FALSE	FALSE	RDSwtA	0.0204	0.2887	11615	outcome	TRUE	reported	textfile	POLR3C	0.00012	0.0239202	exposure	TRUE	reported	LxSYaC	textfile	2	TRUE
rs10950045	C	T	C	T	0.17	-0.0284	0.466276	0.5	FALSE	FALSE	FALSE	RDSwtA	0.0199	0.1539	11615	outcome	TRUE	reported	textfile	CRCP	4.9e-06	0.0372071	exposure	TRUE	reported	LxSYaC	textfile	2	TRUE
rs113080446	A	G	A	G	0.37	0.0202	0.017897	0.04	FALSE	FALSE	FALSE	RDSwtA	0.0563	0.7201	11202	outcome	TRUE	reported	textfile	POLR3A	8.8e-05	0.0943517	exposure	TRUE	reported	LxSYaC	textfile	2	TRUE
rs11526166	G	A	G	A	-0.15	0.0114	0.322012	0.33	FALSE	FALSE	FALSE	RDSwtA	0.0218	0.6004	11075	outcome	TRUE	reported	textfile	CRCP	0.00015	0.0395667	exposure	TRUE	reported	LxSYaC	textfile	2	TRUE
rs11616127	T	C	T	C	-0.14	-0.0582	0.263864	0.25	FALSE	FALSE	FALSE	RDSwtA	0.0225	0.009741	11615	outcome	TRUE	reported	textfile	POLR3B	1.4e-05	0.0322294	exposure	TRUE	reported	LxSYaC	textfile	2	TRUE
rs11646266	T	C	T	C	-0.089	0.0288	0.355456	0.44	FALSE	FALSE	FALSE	RDSwtA	0.0244	0.2388	11050	outcome	TRUE	reported	textfile	POLR3K	6.5e-05	0.0222841	exposure	TRUE	reported	LxSYaC	textfile	2	TRUE
rs11912852	T	G	T	G	0.3	-0.0441	0.244813	0.29	FALSE	FALSE	FALSE	RDSwtA	0.0214	0.03922	11615	outcome	TRUE	reported	textfile	POLR3H	5.1e-20	0.0327444	exposure	TRUE	reported	LxSYaC	textfile	2	TRUE
rs13058723	T	C	T	C	-0.17	0.0057	0.122737	0.18	FALSE	FALSE	FALSE	RDSwtA	0.0261	0.826	11615	outcome	TRUE	reported	textfile	POLR3H	2e-05	0.0398603	exposure	TRUE	reported	LxSYaC	textfile	2	TRUE
rs13174802	T	C	T	C	-0.27	0.0294	0.048804	0.07	FALSE	FALSE	FALSE	RDSwtA	0.0416	0.48	11050	outcome	TRUE	reported	textfile	POLR3G	0.00024	0.0735154	exposure	TRUE	reported	LxSYaC	textfile	2	TRUE
rs13436287	G	A	G	A	-0.14	-0.0041	0.369137	0.31	FALSE	FALSE	FALSE	RDSwtA	0.0214	0.8461	11050	outcome	TRUE	reported	textfile	POLR3G	0.00025	0.0382278	exposure	TRUE	reported	LxSYaC	textfile	2	TRUE
rs154568	C	G	C	G	-0.25	0.0055	0.430465	0.46	FALSE	TRUE	TRUE	RDSwtA	0.0197	0.7821	11050	outcome	TRUE	reported	textfile	POLR3G	1.2e-13	0.0337073	exposure	TRUE	reported	LxSYaC	textfile	2	FALSE
rs191337621	G	A	G	A	-0.55	-0.1356	0.013882	0.02	FALSE	FALSE	FALSE	RDSwtA	0.107	0.2048	6152	outcome	TRUE	reported	textfile	CRCP	0.00013	0.143736	exposure	TRUE	reported	LxSYaC	textfile	2	TRUE
rs2562145	G	C	G	C	-0.18	-0.0324	0.41389	0.36	FALSE	TRUE	FALSE	RDSwtA	0.0234	0.1659	10510	outcome	TRUE	reported	textfile	POLR3K	8.1e-18	0.0209347	exposure	TRUE	reported	LxSYaC	textfile	2	TRUE
rs28376899	A	G	A	G	-0.6	0.0001	0.09489	0.13	FALSE	FALSE	FALSE	RDSwtA	0.0311	0.9962	11615	outcome	TRUE	reported	textfile	CRCP	3.8e-24	0.0591913	exposure	TRUE	reported	LxSYaC	textfile	2	TRUE
rs2839707	A	T	A	T	0.53	0.0006	0.003594	0.01	FALSE	TRUE	FALSE	RDSwtA	0.1211	0.9961	7853	outcome	TRUE	reported	textfile	POLR3H	3.2e-05	0.127442	exposure	TRUE	reported	LxSYaC	textfile	2	TRUE
rs4718436	T	G	T	G	0.17	-0.0043	0.222389	0.23	FALSE	FALSE	FALSE	RDSwtA	0.0239	0.8578	11050	outcome	TRUE	reported	textfile	CRCP	0.00034	0.0474496	exposure	TRUE	reported	LxSYaC	textfile	2	TRUE
rs5758092	G	A	G	A	-0.23	0.0376	0.122538	0.05	FALSE	FALSE	FALSE	RDSwtA	0.0471	0.4241	11615	outcome	TRUE	reported	textfile	POLR3H	1.9e-05	0.0537844	exposure	TRUE	reported	LxSYaC	textfile	2	TRUE
rs5758386	A	G	A	G	-0.41	0.0797	0.178868	0.01	FALSE	FALSE	FALSE	RDSwtA	0.1177	0.4982	8442	outcome	TRUE	reported	textfile	POLR3H	1.3e-09	0.0675743	exposure	TRUE	reported	LxSYaC	textfile	2	TRUE
rs5758527	G	T	G	T	0.12	-0.0086	0.444771	0.47	FALSE	FALSE	FALSE	RDSwtA	0.0192	0.6529	11615	outcome	TRUE	reported	textfile	POLR3H	2.4e-05	0.0284091	exposure	TRUE	reported	LxSYaC	textfile	2	TRUE
rs6002503	G	A	G	A	-0.15	0.0144	0.440493	0.36	FALSE	FALSE	FALSE	RDSwtA	0.0199	0.4681	11615	outcome	TRUE	reported	textfile	POLR3H	3e-07	0.0292772	exposure	TRUE	reported	LxSYaC	textfile	2	TRUE
rs61943670	A	G	A	G	0.23	0.0125	0.240299	0.21	FALSE	FALSE	FALSE	RDSwtA	0.0236	0.5966	11615	outcome	TRUE	reported	textfile	POLR3B	6.9e-12	0.0335291	exposure	TRUE	reported	LxSYaC	textfile	2	TRUE
rs74431482	T	G	T	G	-0.33	0.0439	0.014339	0.03	FALSE	FALSE	FALSE	RDSwtA	0.0948	0.6428	8151	outcome	TRUE	reported	textfile	POLR3A	0.00012	0.0858006	exposure	TRUE	reported	LxSYaC	textfile	2	TRUE
rs76192836	T	C	T	C	-0.33	0.1554	0.035163	0.02	FALSE	FALSE	FALSE	RDSwtA	0.0709	0.02841	11019	outcome	TRUE	reported	textfile	POLR3A	6.9e-05	0.0829207	exposure	TRUE	reported	LxSYaC	textfile	2	TRUE
rs77350866	T	C	T	C	0.29	-0.0437	0.009185	0.04	FALSE	FALSE	FALSE	RDSwtA	0.0575	0.4477	10892	outcome	TRUE	reported	textfile	POLR3H	0.0002	0.0779776	exposure	TRUE	reported	LxSYaC	textfile	2	TRUE
rs7782418	T	C	T	C	0.46	-0.0239	0.055017	0.07	FALSE	FALSE	FALSE	RDSwtA	0.0407	0.558	11615	outcome	TRUE	reported	textfile	CRCP	8.2e-09	0.0798016	exposure	TRUE	reported	LxSYaC	textfile	2	TRUE
Muscle skeletal-Longevity 99p
SNP	effect_allele.exposure	other_allele.exposure	effect_allele.outcome	other_allele.outcome	beta.exposure	beta.outcome	eaf.exposure	eaf.outcome	remove	palindromic	ambiguous	id.outcome	se.outcome	pval.outcome	samplesize.outcome	outcome	mr_keep.outcome	pval_origin.outcome	data_source.outcome	gene.exposure	pval.exposure	se.exposure	exposure	mr_keep.exposure	pval_origin.exposure	id.exposure	data_source.exposure	action	mr_keep
rs10797655	A	G	A	G	0.092	-0.0241	0.423522	0.42	FALSE	FALSE	FALSE	WfBM4Q	0.0319	0.4503	4524	outcome	TRUE	reported	textfile	POLR3C	0.00012	0.0239202	exposure	TRUE	reported	LxSYaC	textfile	2	TRUE
rs10950045	C	T	C	T	0.17	-0.0022	0.466276	0.51	FALSE	FALSE	FALSE	WfBM4Q	0.0309	0.9437	4524	outcome	TRUE	reported	textfile	CRCP	4.9e-06	0.0372071	exposure	TRUE	reported	LxSYaC	textfile	2	TRUE
rs113080446	A	G	A	G	0.37	0.0032	0.017897	0.06	FALSE	FALSE	FALSE	WfBM4Q	0.0872	0.9707	3915	outcome	TRUE	reported	textfile	POLR3A	8.8e-05	0.0943517	exposure	TRUE	reported	LxSYaC	textfile	2	TRUE
rs11526166	G	A	G	A	-0.15	0.0039	0.322012	0.33	FALSE	FALSE	FALSE	WfBM4Q	0.033	0.9058	4524	outcome	TRUE	reported	textfile	CRCP	0.00015	0.0395667	exposure	TRUE	reported	LxSYaC	textfile	2	TRUE
rs11616127	T	C	T	C	-0.14	-0.0803	0.263864	0.24	FALSE	FALSE	FALSE	WfBM4Q	0.0356	0.02431	4524	outcome	TRUE	reported	textfile	POLR3B	1.4e-05	0.0322294	exposure	TRUE	reported	LxSYaC	textfile	2	TRUE
rs11646266	T	C	T	C	-0.089	0.0089	0.355456	0.44	FALSE	FALSE	FALSE	WfBM4Q	0.0392	0.8206	4154	outcome	TRUE	reported	textfile	POLR3K	6.5e-05	0.0222841	exposure	TRUE	reported	LxSYaC	textfile	2	TRUE
rs11912852	T	G	T	G	0.3	-0.0267	0.244813	0.29	FALSE	FALSE	FALSE	WfBM4Q	0.0334	0.4245	4524	outcome	TRUE	reported	textfile	POLR3H	5.1e-20	0.0327444	exposure	TRUE	reported	LxSYaC	textfile	2	TRUE
rs13058723	T	C	T	C	-0.17	-0.0072	0.122737	0.18	FALSE	FALSE	FALSE	WfBM4Q	0.041	0.8603	4524	outcome	TRUE	reported	textfile	POLR3H	2e-05	0.0398603	exposure	TRUE	reported	LxSYaC	textfile	2	TRUE
rs13174802	T	C	T	C	-0.27	0.0943	0.048804	0.06	FALSE	FALSE	FALSE	WfBM4Q	0.0705	0.181	3933	outcome	TRUE	reported	textfile	POLR3G	0.00024	0.0735154	exposure	TRUE	reported	LxSYaC	textfile	2	TRUE
rs13436287	G	A	G	A	-0.14	0.0643	0.369137	0.31	FALSE	FALSE	FALSE	WfBM4Q	0.034	0.05887	4154	outcome	TRUE	reported	textfile	POLR3G	0.00025	0.0382278	exposure	TRUE	reported	LxSYaC	textfile	2	TRUE
rs154568	C	G	C	G	-0.25	-0.0096	0.430465	0.46	FALSE	TRUE	TRUE	WfBM4Q	0.0321	0.7648	4154	outcome	TRUE	reported	textfile	POLR3G	1.2e-13	0.0337073	exposure	TRUE	reported	LxSYaC	textfile	2	FALSE
rs191337621	G	A	G	A	-0.55	-0.2451	0.013882	0.02	FALSE	FALSE	FALSE	WfBM4Q	0.1524	0.1077	3322	outcome	TRUE	reported	textfile	CRCP	0.00013	0.143736	exposure	TRUE	reported	LxSYaC	textfile	2	TRUE
rs2562145	G	C	G	C	-0.18	-0.0525	0.41389	0.36	FALSE	TRUE	FALSE	WfBM4Q	0.0378	0.1647	4154	outcome	TRUE	reported	textfile	POLR3K	8.1e-18	0.0209347	exposure	TRUE	reported	LxSYaC	textfile	2	TRUE
rs28376899	A	G	A	G	-0.6	-0.0573	0.09489	0.14	FALSE	FALSE	FALSE	WfBM4Q	0.0478	0.2311	4524	outcome	TRUE	reported	textfile	CRCP	3.8e-24	0.0591913	exposure	TRUE	reported	LxSYaC	textfile	2	TRUE
rs2839707	A	T	A	T	0.53	0.0732	0.003594	0.01	FALSE	TRUE	FALSE	WfBM4Q	0.2139	0.7323	2409	outcome	TRUE	reported	textfile	POLR3H	3.2e-05	0.127442	exposure	TRUE	reported	LxSYaC	textfile	2	TRUE
rs4718436	T	G	T	G	0.17	0.0244	0.222389	0.23	FALSE	FALSE	FALSE	WfBM4Q	0.0381	0.523	4154	outcome	TRUE	reported	textfile	CRCP	0.00034	0.0474496	exposure	TRUE	reported	LxSYaC	textfile	2	TRUE
rs5758092	G	A	G	A	-0.23	-0.04	0.122538	0.05	FALSE	FALSE	FALSE	WfBM4Q	0.0764	0.6008	4303	outcome	TRUE	reported	textfile	POLR3H	1.9e-05	0.0537844	exposure	TRUE	reported	LxSYaC	textfile	2	TRUE
rs5758527	G	T	G	T	0.12	0.0066	0.444771	0.47	FALSE	FALSE	FALSE	WfBM4Q	0.0301	0.8253	4524	outcome	TRUE	reported	textfile	POLR3H	2.4e-05	0.0284091	exposure	TRUE	reported	LxSYaC	textfile	2	TRUE
rs6002503	G	A	G	A	-0.15	0.0012	0.440493	0.37	FALSE	FALSE	FALSE	WfBM4Q	0.031	0.9681	4524	outcome	TRUE	reported	textfile	POLR3H	3e-07	0.0292772	exposure	TRUE	reported	LxSYaC	textfile	2	TRUE
rs61943670	A	G	A	G	0.23	-0.0377	0.240299	0.2	FALSE	FALSE	FALSE	WfBM4Q	0.0379	0.3193	4524	outcome	TRUE	reported	textfile	POLR3B	6.9e-12	0.0335291	exposure	TRUE	reported	LxSYaC	textfile	2	TRUE
rs73146660	T	C	T	C	-0.68	-0.3481	0.008974	0.02	FALSE	FALSE	FALSE	WfBM4Q	0.1903	0.0674	2902	outcome	TRUE	reported	textfile	CRCP	5.1e-05	0.16786	exposure	TRUE	reported	LxSYaC	textfile	2	TRUE
rs76192836	T	C	T	C	-0.33	0.3516	0.035163	0.02	FALSE	FALSE	FALSE	WfBM4Q	0.1262	0.005353	3322	outcome	TRUE	reported	textfile	POLR3A	6.9e-05	0.0829207	exposure	TRUE	reported	LxSYaC	textfile	2	TRUE
rs77350866	T	C	T	C	0.29	-0.0941	0.009185	0.05	FALSE	FALSE	FALSE	WfBM4Q	0.0923	0.308	3915	outcome	TRUE	reported	textfile	POLR3H	0.0002	0.0779776	exposure	TRUE	reported	LxSYaC	textfile	2	TRUE
rs7782418	T	C	T	C	0.46	0.1019	0.055017	0.07	FALSE	FALSE	FALSE	WfBM4Q	0.0655	0.1199	4303	outcome	TRUE	reported	textfile	CRCP	8.2e-09	0.0798016	exposure	TRUE	reported	LxSYaC	textfile	2	TRUE
Brain cortex-Longevity 90p
SNP	effect_allele.exposure	other_allele.exposure	effect_allele.outcome	other_allele.outcome	beta.exposure	beta.outcome	eaf.exposure	eaf.outcome	remove	palindromic	ambiguous	id.outcome	se.outcome	pval.outcome	samplesize.outcome	outcome	mr_keep.outcome	pval_origin.outcome	data_source.outcome	gene.exposure	pval.exposure	se.exposure	exposure	mr_keep.exposure	pval_origin.exposure	id.exposure	data_source.exposure	action	mr_keep
rs10043702	A	T	A	T	0.29	-0.0019	0.307074	0.31	FALSE	TRUE	FALSE	1Bvwnu	0.0213	0.9297	11050	outcome	TRUE	reported	textfile	POLR3G	1.3e-05	0.0665122	exposure	TRUE	reported	Ri4jlR	textfile	2	TRUE
rs13242721	T	C	T	C	0.29	-0.0193	0.39397	0.54	FALSE	FALSE	FALSE	1Bvwnu	0.0213	0.3644	11050	outcome	TRUE	reported	textfile	CRCP	3.8e-06	0.062743	exposure	TRUE	reported	Ri4jlR	textfile	2	TRUE
rs132762	C	T	C	T	-0.31	-0.0437	0.2546	0.3	FALSE	FALSE	FALSE	1Bvwnu	0.0218	0.04463	11615	outcome	TRUE	reported	textfile	POLR3H	4.7e-09	0.052924	exposure	TRUE	reported	Ri4jlR	textfile	2	TRUE
rs137830	C	T	C	T	0.55	0.0277	0.175265	0.2	FALSE	FALSE	FALSE	1Bvwnu	0.0239	0.2473	11615	outcome	TRUE	reported	textfile	POLR3H	2.6e-15	0.0695433	exposure	TRUE	reported	Ri4jlR	textfile	2	TRUE
rs142567567	T	C	T	C	0.45	0.0162	0.036957	0.04	FALSE	FALSE	FALSE	1Bvwnu	0.067	0.809	10867	outcome	TRUE	reported	textfile	POLR3H	0.00011	0.116357	exposure	TRUE	reported	Ri4jlR	textfile	2	TRUE
rs144836114	A	C	A	C	0.9	-0.1048	0.011382	0.03	FALSE	FALSE	FALSE	1Bvwnu	0.0939	0.2643	8726	outcome	TRUE	reported	textfile	CRCP	3e-07	0.175663	exposure	TRUE	reported	Ri4jlR	textfile	2	TRUE
rs2562131	A	C	A	C	-0.23	-0.0457	0.261964	0.21	FALSE	FALSE	FALSE	1Bvwnu	0.0324	0.1581	10510	outcome	TRUE	reported	textfile	POLR3K	6.5e-07	0.0462243	exposure	TRUE	reported	Ri4jlR	textfile	2	TRUE
rs3114654	G	T	G	T	0.26	0.0081	0.428115	0.33	FALSE	FALSE	FALSE	1Bvwnu	0.0209	0.6988	11050	outcome	TRUE	reported	textfile	POLR3G	3.7e-05	0.0630233	exposure	TRUE	reported	Ri4jlR	textfile	2	TRUE
rs9607777	A	G	A	G	0.56	-0.0383	0.025912	0.04	FALSE	FALSE	FALSE	1Bvwnu	0.0544	0.4818	11432	outcome	TRUE	reported	textfile	POLR3H	4.6e-05	0.137421	exposure	TRUE	reported	Ri4jlR	textfile	2	TRUE
rs9623300	G	C	G	C	-0.34	-0.0749	0.140803	0.1	FALSE	TRUE	FALSE	1Bvwnu	0.0358	0.03632	11050	outcome	TRUE	reported	textfile	POLR3H	0.00013	0.088855	exposure	TRUE	reported	Ri4jlR	textfile	2	TRUE
Brain cortex-Longevity 99p
SNP	effect_allele.exposure	other_allele.exposure	effect_allele.outcome	other_allele.outcome	beta.exposure	beta.outcome	eaf.exposure	eaf.outcome	remove	palindromic	ambiguous	id.outcome	se.outcome	pval.outcome	samplesize.outcome	outcome	mr_keep.outcome	pval_origin.outcome	data_source.outcome	gene.exposure	pval.exposure	se.exposure	exposure	mr_keep.exposure	pval_origin.exposure	id.exposure	data_source.exposure	action	mr_keep
rs10043702	A	T	A	T	0.29	0.0678	0.307074	0.32	FALSE	TRUE	FALSE	QLwgEy	0.0339	0.04565	4154	outcome	TRUE	reported	textfile	POLR3G	1.3e-05	0.0665122	exposure	TRUE	reported	Ri4jlR	textfile	2	TRUE
rs13242721	T	C	T	C	0.29	-0.0136	0.39397	0.56	FALSE	FALSE	FALSE	QLwgEy	0.0347	0.6954	4154	outcome	TRUE	reported	textfile	CRCP	3.8e-06	0.062743	exposure	TRUE	reported	Ri4jlR	textfile	2	TRUE
rs132762	C	T	C	T	-0.31	-0.0301	0.2546	0.3	FALSE	FALSE	FALSE	QLwgEy	0.0339	0.3744	4524	outcome	TRUE	reported	textfile	POLR3H	4.7e-09	0.052924	exposure	TRUE	reported	Ri4jlR	textfile	2	TRUE
rs137830	C	T	C	T	0.55	0.0257	0.175265	0.21	FALSE	FALSE	FALSE	QLwgEy	0.0375	0.4924	4524	outcome	TRUE	reported	textfile	POLR3H	2.6e-15	0.0695433	exposure	TRUE	reported	Ri4jlR	textfile	2	TRUE
rs142567567	T	C	T	C	0.45	-0.0932	0.036957	0.04	FALSE	FALSE	FALSE	QLwgEy	0.1197	0.4361	3545	outcome	TRUE	reported	textfile	POLR3H	0.00011	0.116357	exposure	TRUE	reported	Ri4jlR	textfile	2	TRUE
rs144836114	A	C	A	C	0.9	0.0954	0.011382	0.02	FALSE	FALSE	FALSE	QLwgEy	0.1656	0.5647	2273	outcome	TRUE	reported	textfile	CRCP	3e-07	0.175663	exposure	TRUE	reported	Ri4jlR	textfile	2	TRUE
rs2562131	A	C	A	C	-0.23	-0.0436	0.261964	0.21	FALSE	FALSE	FALSE	QLwgEy	0.0536	0.4164	4000	outcome	TRUE	reported	textfile	POLR3K	6.5e-07	0.0462243	exposure	TRUE	reported	Ri4jlR	textfile	2	TRUE
rs3114654	G	T	G	T	0.26	0.0039	0.428115	0.33	FALSE	FALSE	FALSE	QLwgEy	0.0339	0.9093	4154	outcome	TRUE	reported	textfile	POLR3G	3.7e-05	0.0630233	exposure	TRUE	reported	Ri4jlR	textfile	2	TRUE
rs9607777	A	G	A	G	0.56	0.04	0.025912	0.03	FALSE	FALSE	FALSE	QLwgEy	0.0878	0.6491	4036	outcome	TRUE	reported	textfile	POLR3H	4.6e-05	0.137421	exposure	TRUE	reported	Ri4jlR	textfile	2	TRUE
rs9623300	G	C	G	C	-0.34	-0.0825	0.140803	0.1	FALSE	TRUE	FALSE	QLwgEy	0.058	0.1544	4154	outcome	TRUE	reported	textfile	POLR3H	0.00013	0.088855	exposure	TRUE	reported	Ri4jlR	textfile	2	TRUE
Liver-Longevity 90p
SNP	effect_allele.exposure	other_allele.exposure	effect_allele.outcome	other_allele.outcome	beta.exposure	beta.outcome	eaf.exposure	eaf.outcome	remove	palindromic	ambiguous	id.outcome	se.outcome	pval.outcome	samplesize.outcome	outcome	mr_keep.outcome	pval_origin.outcome	data_source.outcome	gene.exposure	pval.exposure	se.exposure	exposure	mr_keep.exposure	pval_origin.exposure	id.exposure	data_source.exposure	action	mr_keep
rs143629591	T	C	T	C	-0.55	0.1153	0.071603	0.04	FALSE	FALSE	FALSE	6OCe8U	0.0939	0.2195	5844	outcome	TRUE	reported	textfile	CRCP	9.6e-05	0.141008	exposure	TRUE	reported	rVSKRj	textfile	2	TRUE
rs2624756	T	C	T	C	0.23	0.0224	0.312185	0.37	FALSE	FALSE	FALSE	6OCe8U	0.0213	0.2938	11050	outcome	TRUE	reported	textfile	POLR3C	1.7e-06	0.0480552	exposure	TRUE	reported	rVSKRj	textfile	2	TRUE
Liver-Longevity 99p
SNP	effect_allele.exposure	other_allele.exposure	effect_allele.outcome	other_allele.outcome	beta.exposure	beta.outcome	eaf.exposure	eaf.outcome	remove	palindromic	ambiguous	id.outcome	se.outcome	pval.outcome	samplesize.outcome	outcome	mr_keep.outcome	pval_origin.outcome	data_source.outcome	gene.exposure	pval.exposure	se.exposure	exposure	mr_keep.exposure	pval_origin.exposure	id.exposure	data_source.exposure	action	mr_keep
rs143629591	T	C	T	C	-0.55	0.3888	0.071603	0.03	FALSE	FALSE	FALSE	YPYlcF	0.1541	0.01166	2396	outcome	TRUE	reported	textfile	CRCP	9.6e-05	0.141008	exposure	TRUE	reported	rVSKRj	textfile	2	TRUE
rs2624756	T	C	T	C	0.23	0.0256	0.312185	0.38	FALSE	FALSE	FALSE	YPYlcF	0.0351	0.4652	4154	outcome	TRUE	reported	textfile	POLR3C	1.7e-06	0.0480552	exposure	TRUE	reported	rVSKRj	textfile	2	TRUE
Pituitary-Longevity 90p
SNP	effect_allele.exposure	other_allele.exposure	effect_allele.outcome	other_allele.outcome	beta.exposure	beta.outcome	eaf.exposure	eaf.outcome	remove	palindromic	ambiguous	id.outcome	se.outcome	pval.outcome	samplesize.outcome	outcome	mr_keep.outcome	pval_origin.outcome	data_source.outcome	gene.exposure	pval.exposure	se.exposure	exposure	mr_keep.exposure	pval_origin.exposure	id.exposure	data_source.exposure	action	mr_keep
rs1009544	C	G	C	G	-0.26	0.0276	0.117758	0.12	FALSE	TRUE	FALSE	EsN8rz	0.0289	0.3397	11615	outcome	TRUE	reported	textfile	POLR3H	3.3e-05	0.0626248	exposure	TRUE	reported	C12mIC	textfile	2	TRUE
rs144836114	A	C	A	C	0.78	-0.1048	0.011382	0.03	FALSE	FALSE	FALSE	EsN8rz	0.0939	0.2643	8726	outcome	TRUE	reported	textfile	CRCP	1.6e-05	0.180788	exposure	TRUE	reported	C12mIC	textfile	2	TRUE
rs28457031	A	G	A	G	-0.62	0.0286	0.026134	0.03	FALSE	FALSE	FALSE	EsN8rz	0.0641	0.6553	10171	outcome	TRUE	reported	textfile	POLR3H	1.1e-05	0.141021	exposure	TRUE	reported	C12mIC	textfile	2	TRUE
rs313829	G	A	G	A	-0.32	-0.0163	0.300301	0.69	FALSE	FALSE	FALSE	EsN8rz	0.0212	0.4429	11615	outcome	TRUE	reported	textfile	CRCP	1.4e-05	0.0736672	exposure	TRUE	reported	C12mIC	textfile	2	TRUE
rs3757417	G	T	G	T	-0.61	-0.0118	0.094794	0.13	FALSE	FALSE	FALSE	EsN8rz	0.0303	0.6961	11615	outcome	TRUE	reported	textfile	CRCP	1.3e-08	0.10728	exposure	TRUE	reported	C12mIC	textfile	2	TRUE
Pituitary-Longevity 99p
SNP	effect_allele.exposure	other_allele.exposure	effect_allele.outcome	other_allele.outcome	beta.exposure	beta.outcome	eaf.exposure	eaf.outcome	remove	palindromic	ambiguous	id.outcome	se.outcome	pval.outcome	samplesize.outcome	outcome	mr_keep.outcome	pval_origin.outcome	data_source.outcome	gene.exposure	pval.exposure	se.exposure	exposure	mr_keep.exposure	pval_origin.exposure	id.exposure	data_source.exposure	action	mr_keep
rs1009544	C	G	C	G	-0.26	0.0172	0.117758	0.12	FALSE	TRUE	FALSE	M0oK3U	0.0451	0.7032	4524	outcome	TRUE	reported	textfile	POLR3H	3.3e-05	0.0626248	exposure	TRUE	reported	C12mIC	textfile	2	TRUE
rs144836114	A	C	A	C	0.78	0.0954	0.011382	0.02	FALSE	FALSE	FALSE	M0oK3U	0.1656	0.5647	2273	outcome	TRUE	reported	textfile	CRCP	1.6e-05	0.180788	exposure	TRUE	reported	C12mIC	textfile	2	TRUE
rs28457031	A	G	A	G	-0.62	0.0849	0.026134	0.03	FALSE	FALSE	FALSE	M0oK3U	0.1064	0.4249	3692	outcome	TRUE	reported	textfile	POLR3H	1.1e-05	0.141021	exposure	TRUE	reported	C12mIC	textfile	2	TRUE
rs313829	G	A	G	A	-0.32	-0.0313	0.300301	0.71	FALSE	FALSE	FALSE	M0oK3U	0.0338	0.3533	4524	outcome	TRUE	reported	textfile	CRCP	1.4e-05	0.0736672	exposure	TRUE	reported	C12mIC	textfile	2	TRUE
rs3757417	G	T	G	T	-0.61	-0.0759	0.094794	0.14	FALSE	FALSE	FALSE	M0oK3U	0.0457	0.09701	4524	outcome	TRUE	reported	textfile	CRCP	1.3e-08	0.10728	exposure	TRUE	reported	C12mIC	textfile	2	TRUE

## Sheet: Pol II
Adipose Visceral-Longevity 90p
SNP	effect_allele.exposure	other_allele.exposure	effect_allele.outcome	other_allele.outcome	beta.exposure	beta.outcome	eaf.exposure	eaf.outcome	remove	palindromic	ambiguous	id.outcome	se.outcome	pval.outcome	samplesize.outcome	outcome	mr_keep.outcome	pval_origin.outcome	data_source.outcome	gene.exposure	pval.exposure	se.exposure	exposure	mr_keep.exposure	pval_origin.exposure	id.exposure	data_source.exposure	action	mr_keep
rs12531332	T	A	T	A	0.13	-0.0124	0.138112	0.13	FALSE	TRUE	FALSE	p4quIn	0.0322	0.7007	11050	outcome	TRUE	reported	textfile	POLR2J	9.9e-05	0.033393	exposure	TRUE	reported	qXDlih	textfile	2	TRUE
rs28507876	G	A	G	A	-0.095	0.0519	0.173964	0.79	FALSE	FALSE	FALSE	p4quIn	0.0284	0.06786	10510	outcome	TRUE	reported	textfile	POLR2L	2.1e-06	0.0200272	exposure	TRUE	reported	qXDlih	textfile	2	TRUE
rs335135	G	A	G	A	-0.096	0.0119	0.353462	0.55	FALSE	FALSE	FALSE	p4quIn	0.0197	0.5433	11615	outcome	TRUE	reported	textfile	POLR2D	7.9e-05	0.0243197	exposure	TRUE	reported	qXDlih	textfile	2	TRUE
rs3800985	G	C	G	C	0.099	-0.062	0.467252	0.41	FALSE	TRUE	TRUE	p4quIn	0.0231	0.007256	10510	outcome	TRUE	reported	textfile	POLR2J	6.4e-05	0.0247651	exposure	TRUE	reported	qXDlih	textfile	2	FALSE
rs6733255	T	C	T	C	0.18	-0.0024	0.238076	0.96	FALSE	FALSE	FALSE	p4quIn	0.0465	0.9581	11615	outcome	TRUE	reported	textfile	POLR2D	6.2e-05	0.0449431	exposure	TRUE	reported	qXDlih	textfile	2	TRUE
rs77675107	A	C	A	C	0.35	-0.1168	0.019086	0.02	FALSE	FALSE	FALSE	p4quIn	0.0759	0.1238	10073	outcome	TRUE	reported	textfile	POLR2I	4.5e-05	0.0857804	exposure	TRUE	reported	qXDlih	textfile	2	TRUE
rs9649239	G	C	G	C	0.12	-0.0219	0.145696	0.16	FALSE	TRUE	FALSE	p4quIn	0.0275	0.4276	11615	outcome	TRUE	reported	textfile	POLR2J	8.2e-05	0.0304686	exposure	TRUE	reported	qXDlih	textfile	2	TRUE
Adipose Visceral-Longevity 99p
SNP	effect_allele.exposure	other_allele.exposure	effect_allele.outcome	other_allele.outcome	beta.exposure	beta.outcome	eaf.exposure	eaf.outcome	remove	palindromic	ambiguous	id.outcome	se.outcome	pval.outcome	samplesize.outcome	outcome	mr_keep.outcome	pval_origin.outcome	data_source.outcome	gene.exposure	pval.exposure	se.exposure	exposure	mr_keep.exposure	pval_origin.exposure	id.exposure	data_source.exposure	action	mr_keep
rs12531332	T	A	T	A	0.13	0.0165	0.138112	0.13	FALSE	TRUE	FALSE	9084lz	0.0522	0.7516	4154	outcome	TRUE	reported	textfile	POLR2J	9.9e-05	0.033393	exposure	TRUE	reported	qXDlih	textfile	2	TRUE
rs28507876	G	A	G	A	-0.095	0.0244	0.173964	0.79	FALSE	FALSE	FALSE	9084lz	0.0453	0.5907	4154	outcome	TRUE	reported	textfile	POLR2L	2.1e-06	0.0200272	exposure	TRUE	reported	qXDlih	textfile	2	TRUE
rs335135	G	A	G	A	-0.096	0.032	0.353462	0.56	FALSE	FALSE	FALSE	9084lz	0.0308	0.2987	4524	outcome	TRUE	reported	textfile	POLR2D	7.9e-05	0.0243197	exposure	TRUE	reported	qXDlih	textfile	2	TRUE
rs3800985	G	C	G	C	0.099	-0.1242	0.467252	0.41	FALSE	TRUE	TRUE	9084lz	0.0364	0.0006353	4154	outcome	TRUE	reported	textfile	POLR2J	6.4e-05	0.0247651	exposure	TRUE	reported	qXDlih	textfile	2	FALSE
rs6733255	T	C	T	C	0.18	0.0186	0.238076	0.95	FALSE	FALSE	FALSE	9084lz	0.0739	0.8017	4303	outcome	TRUE	reported	textfile	POLR2D	6.2e-05	0.0449431	exposure	TRUE	reported	qXDlih	textfile	2	TRUE
rs77675107	A	C	A	C	0.35	0.0417	0.019086	0.03	FALSE	FALSE	FALSE	9084lz	0.1123	0.7101	3692	outcome	TRUE	reported	textfile	POLR2I	4.5e-05	0.0857804	exposure	TRUE	reported	qXDlih	textfile	2	TRUE
rs9649239	G	C	G	C	0.12	-0.0636	0.145696	0.16	FALSE	TRUE	FALSE	9084lz	0.0432	0.1405	4524	outcome	TRUE	reported	textfile	POLR2J	8.2e-05	0.0304686	exposure	TRUE	reported	qXDlih	textfile	2	TRUE
Muscle skeletal-Longevity 90p
SNP	effect_allele.exposure	other_allele.exposure	effect_allele.outcome	other_allele.outcome	beta.exposure	beta.outcome	eaf.exposure	eaf.outcome	remove	palindromic	ambiguous	id.outcome	se.outcome	pval.outcome	samplesize.outcome	outcome	mr_keep.outcome	pval_origin.outcome	data_source.outcome	gene.exposure	pval.exposure	se.exposure	exposure	mr_keep.exposure	pval_origin.exposure	id.exposure	data_source.exposure	action	mr_keep
rs10953366	G	A	G	A	0.097	0.0318	0.28165	0.83	FALSE	FALSE	FALSE	N79yu6	0.0269	0.2379	11075	outcome	TRUE	reported	textfile	POLR2J	6.2e-05	0.0242193	exposure	TRUE	reported	vmpG4z	textfile	2	TRUE
rs115380102	T	C	T	C	0.17	-0.0028	0.063826	0.05	FALSE	FALSE	FALSE	N79yu6	0.0483	0.9532	11432	outcome	TRUE	reported	textfile	POLR2J	7.3e-05	0.0428612	exposure	TRUE	reported	vmpG4z	textfile	2	TRUE
rs11552767	A	G	A	G	0.15	0.044	0.109162	0.14	FALSE	FALSE	FALSE	N79yu6	0.0298	0.1404	11050	outcome	TRUE	reported	textfile	POLR2D	3.8e-05	0.0364138	exposure	TRUE	reported	vmpG4z	textfile	2	TRUE
rs116545764	T	A	T	A	0.25	0.0098	0.033729	0.04	FALSE	TRUE	FALSE	N79yu6	0.0671	0.8836	11124	outcome	TRUE	reported	textfile	POLR2D	4.7e-05	0.0614241	exposure	TRUE	reported	vmpG4z	textfile	2	TRUE
rs11731657	C	T	C	T	-0.065	-0.0045	0.177915	0.3	FALSE	FALSE	FALSE	N79yu6	0.0213	0.8322	11615	outcome	TRUE	reported	textfile	POLR2B	0.00015	0.0171456	exposure	TRUE	reported	vmpG4z	textfile	2	TRUE
rs1277309	T	C	T	C	-0.11	-0.0132	0.106685	0.9	FALSE	FALSE	FALSE	N79yu6	0.0324	0.6834	11615	outcome	TRUE	reported	textfile	POLR2B	1.9e-05	0.025723	exposure	TRUE	reported	vmpG4z	textfile	2	TRUE
rs12977814	A	C	A	C	0.077	0.0313	0.290339	0.32	FALSE	FALSE	FALSE	N79yu6	0.021	0.1362	11615	outcome	TRUE	reported	textfile	POLR2I	0.0002	0.0207044	exposure	TRUE	reported	vmpG4z	textfile	2	TRUE
rs13241958	G	A	G	A	0.071	0.0357	0.238419	0.44	FALSE	FALSE	FALSE	N79yu6	0.0201	0.0763	11050	outcome	TRUE	reported	textfile	POLR2J	0.00019	0.0190249	exposure	TRUE	reported	vmpG4z	textfile	2	TRUE
rs13421416	G	T	G	T	-0.18	-0.0011	0.445083	0.45	FALSE	FALSE	FALSE	N79yu6	0.0203	0.9579	11050	outcome	TRUE	reported	textfile	POLR2D	3.4e-13	0.0247337	exposure	TRUE	reported	vmpG4z	textfile	2	TRUE
rs142696626	A	G	A	G	-0.42	0.2078	0.006687	0.01	FALSE	FALSE	FALSE	N79yu6	0.1338	0.1206	6914	outcome	TRUE	reported	textfile	POLR2G	3.7e-05	0.101807	exposure	TRUE	reported	vmpG4z	textfile	2	TRUE
rs148815011	A	G	A	G	0.2	0.0621	0.024065	0.04	FALSE	FALSE	FALSE	N79yu6	0.0654	0.3422	10097	outcome	TRUE	reported	textfile	POLR2L	0.00015	0.0527556	exposure	TRUE	reported	vmpG4z	textfile	2	TRUE
rs17262104	G	T	G	T	-0.2	-0.028	0.0469	0.06	FALSE	FALSE	FALSE	N79yu6	0.0425	0.5104	11432	outcome	TRUE	reported	textfile	POLR2D	6.3e-05	0.049984	exposure	TRUE	reported	vmpG4z	textfile	2	TRUE
rs1820971	T	C	T	C	-0.13	0.0083	0.250655	0.25	FALSE	FALSE	FALSE	N79yu6	0.0258	0.7473	11050	outcome	TRUE	reported	textfile	POLR2D	9.6e-07	0.0265324	exposure	TRUE	reported	vmpG4z	textfile	2	TRUE
rs188860117	T	C	T	C	0.25	0.1013	0.028749	0.05	FALSE	FALSE	FALSE	N79yu6	0.0497	0.04173	10867	outcome	TRUE	reported	textfile	POLR2D	1.5e-05	0.0577542	exposure	TRUE	reported	vmpG4z	textfile	2	TRUE
rs2244655	C	T	C	T	-0.2	0.004	0.095887	0.05	FALSE	FALSE	FALSE	N79yu6	0.051	0.9368	10644	outcome	TRUE	reported	textfile	POLR2D	2.8e-05	0.0477424	exposure	TRUE	reported	vmpG4z	textfile	2	TRUE
rs2255177	C	T	C	T	-0.11	0.0005	0.315424	0.32	FALSE	FALSE	FALSE	N79yu6	0.0209	0.9817	11615	outcome	TRUE	reported	textfile	POLR2D	1.4e-05	0.0253231	exposure	TRUE	reported	vmpG4z	textfile	2	TRUE
rs34071492	G	A	G	A	-0.16	-0.0014	0.116657	0.14	FALSE	FALSE	FALSE	N79yu6	0.0292	0.9608	11050	outcome	TRUE	reported	textfile	POLR2D	1.3e-05	0.0366964	exposure	TRUE	reported	vmpG4z	textfile	2	TRUE
rs34284803	C	T	C	T	-0.12	-0.0059	0.127034	0.16	FALSE	FALSE	FALSE	N79yu6	0.0336	0.8608	10510	outcome	TRUE	reported	textfile	POLR2L	1e-05	0.0271667	exposure	TRUE	reported	vmpG4z	textfile	2	TRUE
rs35201354	C	G	C	G	-0.15	0.0194	0.103961	0.11	FALSE	TRUE	FALSE	N79yu6	0.0346	0.5745	11050	outcome	TRUE	reported	textfile	POLR2D	3.4e-05	0.0361893	exposure	TRUE	reported	vmpG4z	textfile	2	TRUE
rs35257975	A	C	A	C	0.23	-0.0416	0.032722	0.05	FALSE	FALSE	FALSE	N79yu6	0.0545	0.4451	11075	outcome	TRUE	reported	textfile	POLR2L	1.4e-06	0.0476683	exposure	TRUE	reported	vmpG4z	textfile	2	TRUE
rs401236	G	A	G	A	-0.16	-0.0271	0.042995	0.92	FALSE	FALSE	FALSE	N79yu6	0.04	0.4973	11050	outcome	TRUE	reported	textfile	POLR2J	0.00024	0.0435647	exposure	TRUE	reported	vmpG4z	textfile	2	TRUE
rs61867550	C	T	C	T	-0.26	0.0247	0.030792	0.04	FALSE	FALSE	FALSE	N79yu6	0.0865	0.7747	6240	outcome	TRUE	reported	textfile	POLR2L	4.1e-06	0.0564451	exposure	TRUE	reported	vmpG4z	textfile	2	TRUE
rs6714283	A	G	A	G	-0.26	-0.0074	0.125615	0.04	FALSE	FALSE	FALSE	N79yu6	0.0555	0.8933	11432	outcome	TRUE	reported	textfile	POLR2D	6.1e-08	0.0480073	exposure	TRUE	reported	vmpG4z	textfile	2	TRUE
rs7126805	A	G	A	G	-0.15	0.0309	0.431709	0.72	FALSE	FALSE	FALSE	N79yu6	0.0249	0.2152	10510	outcome	TRUE	reported	textfile	POLR2L	8.7e-12	0.0219731	exposure	TRUE	reported	vmpG4z	textfile	2	TRUE
rs7248046	A	C	A	C	-0.11	-0.0088	0.100702	0.14	FALSE	FALSE	FALSE	N79yu6	0.0301	0.7685	11075	outcome	TRUE	reported	textfile	POLR2I	0.00018	0.0293682	exposure	TRUE	reported	vmpG4z	textfile	2	TRUE
rs79110686	A	G	A	G	0.14	0.0008	0.36845	0.45	FALSE	FALSE	FALSE	N79yu6	0.0212	0.9689	11050	outcome	TRUE	reported	textfile	POLR2D	1.2e-08	0.0245626	exposure	TRUE	reported	vmpG4z	textfile	2	TRUE
rs7936322	T	C	T	C	-0.086	-0.0045	0.464499	0.49	FALSE	FALSE	FALSE	N79yu6	0.0194	0.8146	11615	outcome	TRUE	reported	textfile	POLR2L	2e-05	0.0201646	exposure	TRUE	reported	vmpG4z	textfile	2	TRUE
rs7946756	A	T	A	T	-0.14	0.012	0.436907	0.38	FALSE	TRUE	TRUE	N79yu6	0.0244	0.6222	10510	outcome	TRUE	reported	textfile	POLR2L	6.1e-11	0.0214026	exposure	TRUE	reported	vmpG4z	textfile	2	FALSE
rs885276	T	A	T	A	0.091	0.0083	0.439006	0.42	FALSE	TRUE	TRUE	N79yu6	0.0198	0.6757	11615	outcome	TRUE	reported	textfile	POLR2D	0.00016	0.0241059	exposure	TRUE	reported	vmpG4z	textfile	2	FALSE
Muscle skeletal-Longevity 99p
SNP	effect_allele.exposure	other_allele.exposure	effect_allele.outcome	other_allele.outcome	beta.exposure	beta.outcome	eaf.exposure	eaf.outcome	remove	palindromic	ambiguous	id.outcome	se.outcome	pval.outcome	samplesize.outcome	outcome	mr_keep.outcome	pval_origin.outcome	data_source.outcome	gene.exposure	pval.exposure	se.exposure	exposure	mr_keep.exposure	pval_origin.exposure	id.exposure	data_source.exposure	action	mr_keep
rs10953366	G	A	G	A	0.097	0.0638	0.28165	0.83	FALSE	FALSE	FALSE	UnYLiU	0.0408	0.1182	4524	outcome	TRUE	reported	textfile	POLR2J	6.2e-05	0.0242193	exposure	TRUE	reported	vmpG4z	textfile	2	TRUE
rs115380102	T	C	T	C	0.17	-0.0858	0.063826	0.04	FALSE	FALSE	FALSE	UnYLiU	0.0808	0.2878	4050	outcome	TRUE	reported	textfile	POLR2J	7.3e-05	0.0428612	exposure	TRUE	reported	vmpG4z	textfile	2	TRUE
rs11552767	A	G	A	G	0.15	0.0541	0.109162	0.15	FALSE	FALSE	FALSE	UnYLiU	0.0485	0.2654	4154	outcome	TRUE	reported	textfile	POLR2D	3.8e-05	0.0364138	exposure	TRUE	reported	vmpG4z	textfile	2	TRUE
rs116545764	T	A	T	A	0.25	0.0436	0.033729	0.04	FALSE	TRUE	FALSE	UnYLiU	0.1158	0.7063	3322	outcome	TRUE	reported	textfile	POLR2D	4.7e-05	0.0614241	exposure	TRUE	reported	vmpG4z	textfile	2	TRUE
rs11731657	C	T	C	T	-0.065	-0.046	0.177915	0.3	FALSE	FALSE	FALSE	UnYLiU	0.0331	0.1641	4524	outcome	TRUE	reported	textfile	POLR2B	0.00015	0.0171456	exposure	TRUE	reported	vmpG4z	textfile	2	TRUE
rs1277309	T	C	T	C	-0.11	-0.0011	0.106685	0.9	FALSE	FALSE	FALSE	UnYLiU	0.0503	0.9832	4524	outcome	TRUE	reported	textfile	POLR2B	1.9e-05	0.025723	exposure	TRUE	reported	vmpG4z	textfile	2	TRUE
rs12977814	A	C	A	C	0.077	0.0564	0.290339	0.32	FALSE	FALSE	FALSE	UnYLiU	0.0328	0.0855	4524	outcome	TRUE	reported	textfile	POLR2I	0.0002	0.0207044	exposure	TRUE	reported	vmpG4z	textfile	2	TRUE
rs13241958	G	A	G	A	0.071	0.0561	0.238419	0.44	FALSE	FALSE	FALSE	UnYLiU	0.0325	0.08405	4154	outcome	TRUE	reported	textfile	POLR2J	0.00019	0.0190249	exposure	TRUE	reported	vmpG4z	textfile	2	TRUE
rs13421416	G	T	G	T	-0.18	0.011	0.445083	0.45	FALSE	FALSE	FALSE	UnYLiU	0.0332	0.7415	4154	outcome	TRUE	reported	textfile	POLR2D	3.4e-13	0.0247337	exposure	TRUE	reported	vmpG4z	textfile	2	TRUE
rs139360617	C	T	C	T	-0.2	0.0541	0.048763	0.02	FALSE	FALSE	FALSE	UnYLiU	0.1829	0.7674	3322	outcome	TRUE	reported	textfile	POLR2J	5.5e-05	0.0495872	exposure	TRUE	reported	vmpG4z	textfile	2	TRUE
rs148815011	A	G	A	G	0.2	0.0854	0.024065	0.05	FALSE	FALSE	FALSE	UnYLiU	0.1046	0.4138	3545	outcome	TRUE	reported	textfile	POLR2L	0.00015	0.0527556	exposure	TRUE	reported	vmpG4z	textfile	2	TRUE
rs17262104	G	T	G	T	-0.2	0.0264	0.0469	0.06	FALSE	FALSE	FALSE	UnYLiU	0.0715	0.7123	4171	outcome	TRUE	reported	textfile	POLR2D	6.3e-05	0.049984	exposure	TRUE	reported	vmpG4z	textfile	2	TRUE
rs1820971	T	C	T	C	-0.13	0.0315	0.250655	0.25	FALSE	FALSE	FALSE	UnYLiU	0.0409	0.4407	4154	outcome	TRUE	reported	textfile	POLR2D	9.6e-07	0.0265324	exposure	TRUE	reported	vmpG4z	textfile	2	TRUE
rs188860117	T	C	T	C	0.25	0.0844	0.028749	0.05	FALSE	FALSE	FALSE	UnYLiU	0.0824	0.3059	3801	outcome	TRUE	reported	textfile	POLR2D	1.5e-05	0.0577542	exposure	TRUE	reported	vmpG4z	textfile	2	TRUE
rs2244655	C	T	C	T	-0.2	0.045	0.095887	0.05	FALSE	FALSE	FALSE	UnYLiU	0.0837	0.5905	3812	outcome	TRUE	reported	textfile	POLR2D	2.8e-05	0.0477424	exposure	TRUE	reported	vmpG4z	textfile	2	TRUE
rs2255177	C	T	C	T	-0.11	0.0171	0.315424	0.32	FALSE	FALSE	FALSE	UnYLiU	0.0325	0.5983	4524	outcome	TRUE	reported	textfile	POLR2D	1.4e-05	0.0253231	exposure	TRUE	reported	vmpG4z	textfile	2	TRUE
rs34071492	G	A	G	A	-0.16	-0.013	0.116657	0.14	FALSE	FALSE	FALSE	UnYLiU	0.0469	0.782	4154	outcome	TRUE	reported	textfile	POLR2D	1.3e-05	0.0366964	exposure	TRUE	reported	vmpG4z	textfile	2	TRUE
rs34284803	C	T	C	T	-0.12	-0.0231	0.127034	0.16	FALSE	FALSE	FALSE	UnYLiU	0.0536	0.6656	4154	outcome	TRUE	reported	textfile	POLR2L	1e-05	0.0271667	exposure	TRUE	reported	vmpG4z	textfile	2	TRUE
rs35201354	C	G	C	G	-0.15	-0.0147	0.103961	0.11	FALSE	TRUE	FALSE	UnYLiU	0.0559	0.7921	4154	outcome	TRUE	reported	textfile	POLR2D	3.4e-05	0.0361893	exposure	TRUE	reported	vmpG4z	textfile	2	TRUE
rs35257975	A	C	A	C	0.23	0.0736	0.032722	0.06	FALSE	FALSE	FALSE	UnYLiU	0.0845	0.3835	3827	outcome	TRUE	reported	textfile	POLR2L	1.4e-06	0.0476683	exposure	TRUE	reported	vmpG4z	textfile	2	TRUE
rs401236	G	A	G	A	-0.16	0.0155	0.042995	0.92	FALSE	FALSE	FALSE	UnYLiU	0.0643	0.8093	3933	outcome	TRUE	reported	textfile	POLR2J	0.00024	0.0435647	exposure	TRUE	reported	vmpG4z	textfile	2	TRUE
rs61867550	C	T	C	T	-0.26	0.1536	0.030792	0.04	FALSE	FALSE	FALSE	UnYLiU	0.1485	0.301	2371	outcome	TRUE	reported	textfile	POLR2L	4.1e-06	0.0564451	exposure	TRUE	reported	vmpG4z	textfile	2	TRUE
rs6714283	A	G	A	G	-0.26	0.1917	0.125615	0.03	FALSE	FALSE	FALSE	UnYLiU	0.0947	0.04291	3915	outcome	TRUE	reported	textfile	POLR2D	6.1e-08	0.0480073	exposure	TRUE	reported	vmpG4z	textfile	2	TRUE
rs7126805	A	G	A	G	-0.15	-0.0116	0.431709	0.72	FALSE	FALSE	FALSE	UnYLiU	0.0394	0.7693	4154	outcome	TRUE	reported	textfile	POLR2L	8.7e-12	0.0219731	exposure	TRUE	reported	vmpG4z	textfile	2	TRUE
rs7248046	A	C	A	C	-0.11	-0.0031	0.100702	0.14	FALSE	FALSE	FALSE	UnYLiU	0.0471	0.9478	4524	outcome	TRUE	reported	textfile	POLR2I	0.00018	0.0293682	exposure	TRUE	reported	vmpG4z	textfile	2	TRUE
rs79110686	A	G	A	G	0.14	-0.0159	0.36845	0.44	FALSE	FALSE	FALSE	UnYLiU	0.0343	0.6415	4154	outcome	TRUE	reported	textfile	POLR2D	1.2e-08	0.0245626	exposure	TRUE	reported	vmpG4z	textfile	2	TRUE
rs7936322	T	C	T	C	-0.086	-0.0199	0.464499	0.48	FALSE	FALSE	FALSE	UnYLiU	0.0303	0.5124	4524	outcome	TRUE	reported	textfile	POLR2L	2e-05	0.0201646	exposure	TRUE	reported	vmpG4z	textfile	2	TRUE
rs7946756	A	T	A	T	-0.14	0.0452	0.436907	0.38	FALSE	TRUE	TRUE	UnYLiU	0.0389	0.2449	4154	outcome	TRUE	reported	textfile	POLR2L	6.1e-11	0.0214026	exposure	TRUE	reported	vmpG4z	textfile	2	FALSE
rs885276	T	A	T	A	0.091	0.0165	0.439006	0.42	FALSE	TRUE	TRUE	UnYLiU	0.0309	0.593	4524	outcome	TRUE	reported	textfile	POLR2D	0.00016	0.0241059	exposure	TRUE	reported	vmpG4z	textfile	2	FALSE
Liver-Longevity 90p
SNP	effect_allele.exposure	other_allele.exposure	effect_allele.outcome	other_allele.outcome	beta.exposure	beta.outcome	eaf.exposure	eaf.outcome	remove	palindromic	ambiguous	id.outcome	se.outcome	pval.outcome	samplesize.outcome	outcome	mr_keep.outcome	pval_origin.outcome	data_source.outcome	gene.exposure	pval.exposure	se.exposure	exposure	mr_keep.exposure	pval_origin.exposure	id.exposure	data_source.exposure	action	mr_keep
rs1047760	G	A	G	A	0.28	-0.0053	0.37212	0.46	FALSE	FALSE	FALSE	nUu8kd	0.0208	0.7973	11050	outcome	TRUE	reported	textfile	POLR2D	1.2e-07	0.0528951	exposure	TRUE	reported	Lz3EgA	textfile	2	TRUE
rs4577233	T	C	T	C	0.27	-0.0174	0.2607	0.77	FALSE	FALSE	FALSE	nUu8kd	0.0232	0.453	11615	outcome	TRUE	reported	textfile	POLR2D	1.3e-05	0.0619251	exposure	TRUE	reported	Lz3EgA	textfile	2	TRUE
Liver-Longevity 99p
SNP	effect_allele.exposure	other_allele.exposure	effect_allele.outcome	other_allele.outcome	beta.exposure	beta.outcome	eaf.exposure	eaf.outcome	remove	palindromic	ambiguous	id.outcome	se.outcome	pval.outcome	samplesize.outcome	outcome	mr_keep.outcome	pval_origin.outcome	data_source.outcome	gene.exposure	pval.exposure	se.exposure	exposure	mr_keep.exposure	pval_origin.exposure	id.exposure	data_source.exposure	action	mr_keep
rs1047760	G	A	G	A	0.28	-0.0338	0.37212	0.46	FALSE	FALSE	FALSE	RaTKuw	0.0335	0.3138	4154	outcome	TRUE	reported	textfile	POLR2D	1.2e-07	0.0528951	exposure	TRUE	reported	Lz3EgA	textfile	2	TRUE
rs4577233	T	C	T	C	0.27	-0.0203	0.2607	0.77	FALSE	FALSE	FALSE	RaTKuw	0.0366	0.5791	4524	outcome	TRUE	reported	textfile	POLR2D	1.3e-05	0.0619251	exposure	TRUE	reported	Lz3EgA	textfile	2	TRUE
Pituitary-Longevity 90p
SNP	effect_allele.exposure	other_allele.exposure	effect_allele.outcome	other_allele.outcome	beta.exposure	beta.outcome	eaf.exposure	eaf.outcome	remove	palindromic	ambiguous	id.outcome	se.outcome	pval.outcome	samplesize.outcome	outcome	mr_keep.outcome	pval_origin.outcome	data_source.outcome	gene.exposure	pval.exposure	se.exposure	exposure	mr_keep.exposure	pval_origin.exposure	id.exposure	data_source.exposure	action	mr_keep
rs10418015	T	C	T	C	0.19	0.013	0.490103	0.47	FALSE	FALSE	FALSE	eB7WJB	0.0197	0.5084	11615	outcome	TRUE	reported	textfile	POLR2I	1.6e-05	0.0440381	exposure	TRUE	reported	X05qFm	textfile	2	TRUE
rs114585215	C	G	C	G	0.46	-0.0435	0.056272	0.05	FALSE	TRUE	FALSE	eB7WJB	0.0458	0.3413	11075	outcome	TRUE	reported	textfile	POLR2I	5e-05	0.113423	exposure	TRUE	reported	X05qFm	textfile	2	TRUE
rs117570606	C	T	C	T	0.38	0.0618	0.040533	0.05	FALSE	FALSE	FALSE	eB7WJB	0.0613	0.3133	10510	outcome	TRUE	reported	textfile	POLR2I	3.8e-05	0.0922483	exposure	TRUE	reported	X05qFm	textfile	2	TRUE
rs2254680	C	T	C	T	-0.23	-0.0002	0.350815	0.57	FALSE	FALSE	FALSE	eB7WJB	0.0203	0.9934	11050	outcome	TRUE	reported	textfile	POLR2D	5.8e-05	0.0572025	exposure	TRUE	reported	X05qFm	textfile	2	TRUE
rs335128	A	G	A	G	-0.24	-0.0111	0.334461	0.32	FALSE	FALSE	FALSE	eB7WJB	0.0205	0.5881	11615	outcome	TRUE	reported	textfile	POLR2D	5.9e-06	0.0529808	exposure	TRUE	reported	X05qFm	textfile	2	TRUE
Pituitary-Longevity 99p
SNP	effect_allele.exposure	other_allele.exposure	effect_allele.outcome	other_allele.outcome	beta.exposure	beta.outcome	eaf.exposure	eaf.outcome	remove	palindromic	ambiguous	id.outcome	se.outcome	pval.outcome	samplesize.outcome	outcome	mr_keep.outcome	pval_origin.outcome	data_source.outcome	gene.exposure	pval.exposure	se.exposure	exposure	mr_keep.exposure	pval_origin.exposure	id.exposure	data_source.exposure	action	mr_keep
rs10418015	T	C	T	C	0.19	0.0303	0.490103	0.48	FALSE	FALSE	FALSE	xZKvgy	0.0304	0.3192	4524	outcome	TRUE	reported	textfile	POLR2I	1.6e-05	0.0440381	exposure	TRUE	reported	X05qFm	textfile	2	TRUE
rs114585215	C	G	C	G	0.46	0.0184	0.056272	0.05	FALSE	TRUE	FALSE	xZKvgy	0.0721	0.7982	4303	outcome	TRUE	reported	textfile	POLR2I	5e-05	0.113423	exposure	TRUE	reported	X05qFm	textfile	2	TRUE
rs117570606	C	T	C	T	0.38	0.1752	0.040533	0.05	FALSE	FALSE	FALSE	xZKvgy	0.1037	0.09111	3322	outcome	TRUE	reported	textfile	POLR2I	3.8e-05	0.0922483	exposure	TRUE	reported	X05qFm	textfile	2	TRUE
rs2254680	C	T	C	T	-0.23	0.0168	0.350815	0.57	FALSE	FALSE	FALSE	xZKvgy	0.0331	0.6125	4154	outcome	TRUE	reported	textfile	POLR2D	5.8e-05	0.0572025	exposure	TRUE	reported	X05qFm	textfile	2	TRUE
rs335128	A	G	A	G	-0.24	0.0244	0.334461	0.32	FALSE	FALSE	FALSE	xZKvgy	0.0321	0.4469	4524	outcome	TRUE	reported	textfile	POLR2D	5.9e-06	0.0529808	exposure	TRUE	reported	X05qFm	textfile	2	TRUE
Colon transverse-Longevity 90p
SNP	effect_allele.exposure	other_allele.exposure	effect_allele.outcome	other_allele.outcome	beta.exposure	beta.outcome	eaf.exposure	eaf.outcome	remove	palindromic	ambiguous	id.outcome	se.outcome	pval.outcome	samplesize.outcome	outcome	mr_keep.outcome	pval_origin.outcome	data_source.outcome	gene.exposure	pval.exposure	se.exposure	exposure	mr_keep.exposure	pval_origin.exposure	id.exposure	data_source.exposure	action	mr_keep
rs1047760	G	A	G	A	0.19	-0.0053	0.37212	0.46	FALSE	FALSE	FALSE	6e5RuV	0.0208	0.7973	11050	outcome	TRUE	reported	textfile	POLR2D	5e-07	0.0378011	exposure	TRUE	reported	P5SZ8H	textfile	2	TRUE
rs10515925	T	C	T	C	-0.21	-0.0067	0.116059	0.15	FALSE	FALSE	FALSE	6e5RuV	0.0272	0.8063	11615	outcome	TRUE	reported	textfile	POLR2D	7.5e-05	0.0530325	exposure	TRUE	reported	P5SZ8H	textfile	2	TRUE
rs186482	G	A	G	A	-0.15	0.0036	0.216872	0.71	FALSE	FALSE	FALSE	6e5RuV	0.0223	0.8724	11615	outcome	TRUE	reported	textfile	POLR2C	1.2e-05	0.0342655	exposure	TRUE	reported	P5SZ8H	textfile	2	TRUE
rs4989124	G	A	G	A	0.14	0.0232	0.293493	0.75	FALSE	FALSE	FALSE	6e5RuV	0.0234	0.3211	11075	outcome	TRUE	reported	textfile	POLR2J	8.4e-06	0.0314273	exposure	TRUE	reported	P5SZ8H	textfile	2	TRUE
rs6465906	C	A	C	A	0.12	0.041	0.357275	0.75	FALSE	FALSE	FALSE	6e5RuV	0.0235	0.0813	11615	outcome	TRUE	reported	textfile	POLR2J	0.00011	0.0310286	exposure	TRUE	reported	P5SZ8H	textfile	2	TRUE
rs66712128	C	T	C	T	0.14	-0.0183	0.204675	0.17	FALSE	FALSE	FALSE	6e5RuV	0.0259	0.4806	11615	outcome	TRUE	reported	textfile	POLR2J	9.5e-05	0.0358697	exposure	TRUE	reported	P5SZ8H	textfile	2	TRUE
rs6744496	A	G	A	G	-0.15	0.039	0.336603	0.41	FALSE	FALSE	FALSE	6e5RuV	0.0195	0.04517	11615	outcome	TRUE	reported	textfile	POLR2D	6.6e-05	0.0375915	exposure	TRUE	reported	P5SZ8H	textfile	2	TRUE
Colon transverse-Longevity 99p
SNP	effect_allele.exposure	other_allele.exposure	effect_allele.outcome	other_allele.outcome	beta.exposure	beta.outcome	eaf.exposure	eaf.outcome	remove	palindromic	ambiguous	id.outcome	se.outcome	pval.outcome	samplesize.outcome	outcome	mr_keep.outcome	pval_origin.outcome	data_source.outcome	gene.exposure	pval.exposure	se.exposure	exposure	mr_keep.exposure	pval_origin.exposure	id.exposure	data_source.exposure	action	mr_keep
rs1047760	G	A	G	A	0.19	-0.0338	0.37212	0.46	FALSE	FALSE	FALSE	EX17SJ	0.0335	0.3138	4154	outcome	TRUE	reported	textfile	POLR2D	5e-07	0.0378011	exposure	TRUE	reported	P5SZ8H	textfile	2	TRUE
rs10515925	T	C	T	C	-0.21	-0.016	0.116059	0.16	FALSE	FALSE	FALSE	EX17SJ	0.042	0.7022	4524	outcome	TRUE	reported	textfile	POLR2D	7.5e-05	0.0530325	exposure	TRUE	reported	P5SZ8H	textfile	2	TRUE
rs186482	G	A	G	A	-0.15	-0.0395	0.216872	0.71	FALSE	FALSE	FALSE	EX17SJ	0.0353	0.2638	4524	outcome	TRUE	reported	textfile	POLR2C	1.2e-05	0.0342655	exposure	TRUE	reported	P5SZ8H	textfile	2	TRUE
rs4989124	G	A	G	A	0.14	0.0446	0.293493	0.75	FALSE	FALSE	FALSE	EX17SJ	0.0354	0.2078	4524	outcome	TRUE	reported	textfile	POLR2J	8.4e-06	0.0314273	exposure	TRUE	reported	P5SZ8H	textfile	2	TRUE
rs6465906	C	A	C	A	0.12	0.0513	0.357275	0.76	FALSE	FALSE	FALSE	EX17SJ	0.0369	0.1647	4524	outcome	TRUE	reported	textfile	POLR2J	0.00011	0.0310286	exposure	TRUE	reported	P5SZ8H	textfile	2	TRUE
rs66712128	C	T	C	T	0.14	-0.0304	0.204675	0.17	FALSE	FALSE	FALSE	EX17SJ	0.0405	0.4526	4524	outcome	TRUE	reported	textfile	POLR2J	9.5e-05	0.0358697	exposure	TRUE	reported	P5SZ8H	textfile	2	TRUE
rs6744496	A	G	A	G	-0.15	0.0301	0.336603	0.41	FALSE	FALSE	FALSE	EX17SJ	0.0303	0.3207	4524	outcome	TRUE	reported	textfile	POLR2D	6.6e-05	0.0375915	exposure	TRUE	reported	P5SZ8H	textfile	2	TRUE
Pancreas-Longevity 90p
SNP	effect_allele.exposure	other_allele.exposure	effect_allele.outcome	other_allele.outcome	beta.exposure	beta.outcome	eaf.exposure	eaf.outcome	remove	palindromic	ambiguous	id.outcome	se.outcome	pval.outcome	samplesize.outcome	outcome	mr_keep.outcome	pval_origin.outcome	data_source.outcome	gene.exposure	pval.exposure	se.exposure	exposure	mr_keep.exposure	pval_origin.exposure	id.exposure	data_source.exposure	action	mr_keep
rs113982254	G	C	G	C	0.15	0.0079	0.184649	0.22	FALSE	TRUE	FALSE	9SBo5D	0.0233	0.7357	11615	outcome	TRUE	reported	textfile	POLR2B	3.9e-05	0.0364668	exposure	TRUE	reported	p2x56W	textfile	2	TRUE
rs2244507	G	A	G	A	-0.25	0.0034	0.345584	0.59	FALSE	FALSE	FALSE	9SBo5D	0.0193	0.8591	11615	outcome	TRUE	reported	textfile	POLR2D	1.8e-05	0.0582974	exposure	TRUE	reported	p2x56W	textfile	2	TRUE
rs335128	A	G	A	G	-0.31	-0.0111	0.334461	0.32	FALSE	FALSE	FALSE	9SBo5D	0.0205	0.5881	11615	outcome	TRUE	reported	textfile	POLR2D	1.9e-07	0.0595139	exposure	TRUE	reported	p2x56W	textfile	2	TRUE
rs7595381	T	C	T	C	-0.31	0.006	0.246313	0.24	FALSE	FALSE	FALSE	9SBo5D	0.0224	0.7891	11615	outcome	TRUE	reported	textfile	POLR2D	5e-07	0.0616754	exposure	TRUE	reported	p2x56W	textfile	2	TRUE
Pancreas-Longevity 99p
SNP	effect_allele.exposure	other_allele.exposure	effect_allele.outcome	other_allele.outcome	beta.exposure	beta.outcome	eaf.exposure	eaf.outcome	remove	palindromic	ambiguous	id.outcome	se.outcome	pval.outcome	samplesize.outcome	outcome	mr_keep.outcome	pval_origin.outcome	data_source.outcome	gene.exposure	pval.exposure	se.exposure	exposure	mr_keep.exposure	pval_origin.exposure	id.exposure	data_source.exposure	action	mr_keep
rs113982254	G	C	G	C	0.15	-0.0041	0.184649	0.22	FALSE	TRUE	FALSE	VNb4me	0.0367	0.9104	4524	outcome	TRUE	reported	textfile	POLR2B	3.9e-05	0.0364668	exposure	TRUE	reported	p2x56W	textfile	2	TRUE
rs2244507	G	A	G	A	-0.25	0.0143	0.345584	0.59	FALSE	FALSE	FALSE	VNb4me	0.0303	0.6371	4524	outcome	TRUE	reported	textfile	POLR2D	1.8e-05	0.0582974	exposure	TRUE	reported	p2x56W	textfile	2	TRUE
rs335128	A	G	A	G	-0.31	0.0244	0.334461	0.32	FALSE	FALSE	FALSE	VNb4me	0.0321	0.4469	4524	outcome	TRUE	reported	textfile	POLR2D	1.9e-07	0.0595139	exposure	TRUE	reported	p2x56W	textfile	2	TRUE
rs7595381	T	C	T	C	-0.31	-0.0487	0.246313	0.25	FALSE	FALSE	FALSE	VNb4me	0.035	0.1641	4524	outcome	TRUE	reported	textfile	POLR2D	5e-07	0.0616754	exposure	TRUE	reported	p2x56W	textfile	2	TRUE
Brain cortex-Longevity 90p
SNP	effect_allele.exposure	other_allele.exposure	effect_allele.outcome	other_allele.outcome	beta.exposure	beta.outcome	eaf.exposure	eaf.outcome	remove	palindromic	ambiguous	id.outcome	se.outcome	pval.outcome	samplesize.outcome	outcome	mr_keep.outcome	pval_origin.outcome	data_source.outcome	gene.exposure	pval.exposure	se.exposure	exposure	mr_keep.exposure	pval_origin.exposure	id.exposure	data_source.exposure	action	mr_keep
rs10418015	T	C	T	C	0.25	0.013	0.490103	0.47	FALSE	FALSE	FALSE	8rD4eb	0.0197	0.5084	11615	outcome	TRUE	reported	textfile	POLR2I	1.2e-08	0.0438618	exposure	TRUE	reported	H2GIUc	textfile	2	TRUE
rs12610853	A	C	A	C	0.21	-0.03	0.336964	0.73	FALSE	FALSE	FALSE	8rD4eb	0.0274	0.2733	10510	outcome	TRUE	reported	textfile	POLR2I	7.9e-05	0.0531994	exposure	TRUE	reported	H2GIUc	textfile	2	TRUE
rs183419	T	C	T	C	-0.26	-0.0191	0.141213	0.8	FALSE	FALSE	FALSE	8rD4eb	0.0243	0.4302	11615	outcome	TRUE	reported	textfile	POLR2C	1.3e-05	0.0596316	exposure	TRUE	reported	H2GIUc	textfile	2	TRUE
rs2231569	T	G	T	G	0.49	-0.083	0.031501	0.04	FALSE	FALSE	FALSE	8rD4eb	0.0609	0.1728	10327	outcome	TRUE	reported	textfile	POLR2I	2.6e-05	0.116502	exposure	TRUE	reported	H2GIUc	textfile	2	TRUE
rs2244507	G	A	G	A	-0.32	0.0034	0.345584	0.59	FALSE	FALSE	FALSE	8rD4eb	0.0193	0.8591	11615	outcome	TRUE	reported	textfile	POLR2D	1.7e-07	0.0611917	exposure	TRUE	reported	H2GIUc	textfile	2	TRUE
rs335128	A	G	A	G	-0.3	-0.0111	0.334461	0.32	FALSE	FALSE	FALSE	8rD4eb	0.0205	0.5881	11615	outcome	TRUE	reported	textfile	POLR2D	9.4e-06	0.0677119	exposure	TRUE	reported	H2GIUc	textfile	2	TRUE
rs56414425	T	C	T	C	-0.65	0.0311	0.041821	0.03	FALSE	FALSE	FALSE	8rD4eb	0.0647	0.6309	10767	outcome	TRUE	reported	textfile	POLR2C	8e-06	0.145571	exposure	TRUE	reported	H2GIUc	textfile	2	TRUE
rs61525479	T	C	T	C	0.24	0.0068	0.379802	0.48	FALSE	FALSE	FALSE	8rD4eb	0.0212	0.7479	11050	outcome	TRUE	reported	textfile	POLR2D	6.1e-05	0.0598667	exposure	TRUE	reported	H2GIUc	textfile	2	TRUE
rs6754215	A	G	A	G	-0.24	0.0111	0.455539	0.41	FALSE	FALSE	FALSE	8rD4eb	0.0195	0.5699	11615	outcome	TRUE	reported	textfile	POLR2D	2.3e-05	0.0566896	exposure	TRUE	reported	H2GIUc	textfile	2	TRUE
Brain cortex-Longevity 99p
SNP	effect_allele.exposure	other_allele.exposure	effect_allele.outcome	other_allele.outcome	beta.exposure	beta.outcome	eaf.exposure	eaf.outcome	remove	palindromic	ambiguous	id.outcome	se.outcome	pval.outcome	samplesize.outcome	outcome	mr_keep.outcome	pval_origin.outcome	data_source.outcome	gene.exposure	pval.exposure	se.exposure	exposure	mr_keep.exposure	pval_origin.exposure	id.exposure	data_source.exposure	action	mr_keep
rs10418015	T	C	T	C	0.25	0.0303	0.490103	0.48	FALSE	FALSE	FALSE	OUw5EK	0.0304	0.3192	4524	outcome	TRUE	reported	textfile	POLR2I	1.2e-08	0.0438618	exposure	TRUE	reported	H2GIUc	textfile	2	TRUE
rs12610853	A	C	A	C	0.21	-0.0013	0.336964	0.74	FALSE	FALSE	FALSE	OUw5EK	0.0438	0.9757	4154	outcome	TRUE	reported	textfile	POLR2I	7.9e-05	0.0531994	exposure	TRUE	reported	H2GIUc	textfile	2	TRUE
rs183419	T	C	T	C	-0.26	-0.0659	0.141213	0.8	FALSE	FALSE	FALSE	OUw5EK	0.038	0.08244	4524	outcome	TRUE	reported	textfile	POLR2C	1.3e-05	0.0596316	exposure	TRUE	reported	H2GIUc	textfile	2	TRUE
rs2231569	T	G	T	G	0.49	0.0162	0.031501	0.04	FALSE	FALSE	FALSE	OUw5EK	0.0996	0.8705	3322	outcome	TRUE	reported	textfile	POLR2I	2.6e-05	0.116502	exposure	TRUE	reported	H2GIUc	textfile	2	TRUE
rs2244507	G	A	G	A	-0.32	0.0143	0.345584	0.59	FALSE	FALSE	FALSE	OUw5EK	0.0303	0.6371	4524	outcome	TRUE	reported	textfile	POLR2D	1.7e-07	0.0611917	exposure	TRUE	reported	H2GIUc	textfile	2	TRUE
rs335128	A	G	A	G	-0.3	0.0244	0.334461	0.32	FALSE	FALSE	FALSE	OUw5EK	0.0321	0.4469	4524	outcome	TRUE	reported	textfile	POLR2D	9.4e-06	0.0677119	exposure	TRUE	reported	H2GIUc	textfile	2	TRUE
rs56414425	T	C	T	C	-0.65	0.0787	0.041821	0.02	FALSE	FALSE	FALSE	OUw5EK	0.1179	0.5044	3915	outcome	TRUE	reported	textfile	POLR2C	8e-06	0.145571	exposure	TRUE	reported	H2GIUc	textfile	2	TRUE
rs61525479	T	C	T	C	0.24	-0.0007	0.379802	0.48	FALSE	FALSE	FALSE	OUw5EK	0.0348	0.9831	4154	outcome	TRUE	reported	textfile	POLR2D	6.1e-05	0.0598667	exposure	TRUE	reported	H2GIUc	textfile	2	TRUE
rs6754215	A	G	A	G	-0.24	-0.013	0.455539	0.42	FALSE	FALSE	FALSE	OUw5EK	0.0303	0.6691	4524	outcome	TRUE	reported	textfile	POLR2D	2.3e-05	0.0566896	exposure	TRUE	reported	H2GIUc	textfile	2	TRUE
Small intestine-Longevity 90p
SNP	effect_allele.exposure	other_allele.exposure	effect_allele.outcome	other_allele.outcome	beta.exposure	beta.outcome	eaf.exposure	eaf.outcome	remove	palindromic	ambiguous	id.outcome	se.outcome	pval.outcome	samplesize.outcome	outcome	mr_keep.outcome	pval_origin.outcome	data_source.outcome	gene.exposure	pval.exposure	se.exposure	exposure	mr_keep.exposure	pval_origin.exposure	id.exposure	data_source.exposure	action	mr_keep
rs10171345	G	A	G	A	-0.29	0.002	0.227713	0.22	FALSE	FALSE	FALSE	hPy23K	0.0238	0.9315	11615	outcome	TRUE	reported	textfile	POLR2D	3e-05	0.0694866	exposure	TRUE	reported	aP9YrA	textfile	2	TRUE
rs79110686	A	G	A	G	0.32	0.0008	0.36845	0.45	FALSE	FALSE	FALSE	hPy23K	0.0212	0.9689	11050	outcome	TRUE	reported	textfile	POLR2D	3.6e-06	0.0690662	exposure	TRUE	reported	aP9YrA	textfile	2	TRUE
Small intestine-Longevity 99p
SNP	effect_allele.exposure	other_allele.exposure	effect_allele.outcome	other_allele.outcome	beta.exposure	beta.outcome	eaf.exposure	eaf.outcome	remove	palindromic	ambiguous	id.outcome	se.outcome	pval.outcome	samplesize.outcome	outcome	mr_keep.outcome	pval_origin.outcome	data_source.outcome	gene.exposure	pval.exposure	se.exposure	exposure	mr_keep.exposure	pval_origin.exposure	id.exposure	data_source.exposure	action	mr_keep
rs10171345	G	A	G	A	-0.29	-0.0415	0.227713	0.23	FALSE	FALSE	FALSE	LQa62M	0.0368	0.2588	4524	outcome	TRUE	reported	textfile	POLR2D	3e-05	0.0694866	exposure	TRUE	reported	aP9YrA	textfile	2	TRUE
rs79110686	A	G	A	G	0.32	-0.0159	0.36845	0.44	FALSE	FALSE	FALSE	LQa62M	0.0343	0.6415	4154	outcome	TRUE	reported	textfile	POLR2D	3.6e-06	0.0690662	exposure	TRUE	reported	aP9YrA	textfile	2	TRUE

## Sheet: Pol I
Brain cortex-Longevity 90p
SNP	effect_allele.exposure	other_allele.exposure	effect_allele.outcome	other_allele.outcome	beta.exposure	beta.outcome	eaf.exposure	eaf.outcome	remove	palindromic	ambiguous	id.outcome	se.outcome	pval.outcome	samplesize.outcome	outcome	mr_keep.outcome	pval_origin.outcome	data_source.outcome	gene.exposure	pval.exposure	se.exposure	exposure	mr_keep.exposure	pval_origin.exposure	id.exposure	data_source.exposure	action	mr_keep
rs111459259	A	C	A	C	0.83	0.0026	0.018013	0.03	FALSE	FALSE	FALSE	00TBGL	0.0621	0.967	10613	outcome	TRUE	reported	textfile	POLR1B	4.8e-05	0.204174	exposure	TRUE	reported	REYeMe	textfile	2	TRUE
rs11689338	G	A	G	A	-0.43	0.0412	0.353163	0.48	FALSE	FALSE	FALSE	00TBGL	0.0195	0.03403	11615	outcome	TRUE	reported	textfile	POLR1B	3.8e-06	0.0930327	exposure	TRUE	reported	REYeMe	textfile	2	TRUE
rs12124	T	A	T	A	0.66	0.1012	0.128849	0.01	FALSE	TRUE	FALSE	00TBGL	0.132	0.4433	6138	outcome	TRUE	reported	textfile	POLR1A	2.4e-07	0.127775	exposure	TRUE	reported	REYeMe	textfile	2	TRUE
rs4572514	C	T	C	T	-0.42	0.0525	0.197087	0.17	FALSE	FALSE	FALSE	00TBGL	0.0273	0.05451	10510	outcome	TRUE	reported	textfile	CD3EAP	5e-08	0.0770457	exposure	TRUE	reported	REYeMe	textfile	2	TRUE
rs4832241	G	A	G	A	0.36	0.0001	0.270201	0.84	FALSE	FALSE	FALSE	00TBGL	0.0261	0.996	11615	outcome	TRUE	reported	textfile	POLR1A	1.9e-07	0.069113	exposure	TRUE	reported	REYeMe	textfile	2	TRUE
rs57492581	C	T	C	T	1.3	-0.0904	0.06374	0.05	FALSE	FALSE	FALSE	00TBGL	0.0497	0.06916	11432	outcome	TRUE	reported	textfile	POLR1B	2.9e-13	0.178108	exposure	TRUE	reported	REYeMe	textfile	2	TRUE
rs60375821	T	C	T	C	-0.4	0.0312	0.11554	0.1	FALSE	FALSE	FALSE	00TBGL	0.033	0.3436	11615	outcome	TRUE	reported	textfile	POLR1A	1.5e-06	0.0831387	exposure	TRUE	reported	REYeMe	textfile	2	TRUE
rs60818406	C	T	C	T	0.52	0.0157	0.17721	0.19	FALSE	FALSE	FALSE	00TBGL	0.0266	0.5547	11050	outcome	TRUE	reported	textfile	POLR1B	1.6e-05	0.120525	exposure	TRUE	reported	REYeMe	textfile	2	TRUE
rs8106228	A	G	A	G	-0.32	0.0007	0.244327	0.19	FALSE	FALSE	FALSE	00TBGL	0.0259	0.9799	11615	outcome	TRUE	reported	textfile	CD3EAP	2.3e-05	0.0755861	exposure	TRUE	reported	REYeMe	textfile	2	TRUE
Brain cortex-Longevity 99p
SNP	effect_allele.exposure	other_allele.exposure	effect_allele.outcome	other_allele.outcome	beta.exposure	beta.outcome	eaf.exposure	eaf.outcome	remove	palindromic	ambiguous	id.outcome	se.outcome	pval.outcome	samplesize.outcome	outcome	mr_keep.outcome	pval_origin.outcome	data_source.outcome	gene.exposure	pval.exposure	se.exposure	exposure	mr_keep.exposure	pval_origin.exposure	id.exposure	data_source.exposure	action	mr_keep
rs111459259	A	C	A	C	0.83	-0.0082	0.018013	0.03	FALSE	FALSE	FALSE	zU6dRW	0.1032	0.9368	3692	outcome	TRUE	reported	textfile	POLR1B	4.8e-05	0.204174	exposure	TRUE	reported	REYeMe	textfile	2	TRUE
rs11689338	G	A	G	A	-0.43	0.0345	0.353163	0.49	FALSE	FALSE	FALSE	zU6dRW	0.0303	0.255	4524	outcome	TRUE	reported	textfile	POLR1B	3.8e-06	0.0930327	exposure	TRUE	reported	REYeMe	textfile	2	TRUE
rs4572514	C	T	C	T	-0.42	0.1098	0.197087	0.17	FALSE	FALSE	FALSE	zU6dRW	0.0429	0.01051	4154	outcome	TRUE	reported	textfile	CD3EAP	5e-08	0.0770457	exposure	TRUE	reported	REYeMe	textfile	2	TRUE
rs4832241	G	A	G	A	0.36	-0.0335	0.270201	0.84	FALSE	FALSE	FALSE	zU6dRW	0.0412	0.4158	4524	outcome	TRUE	reported	textfile	POLR1A	1.9e-07	0.069113	exposure	TRUE	reported	REYeMe	textfile	2	TRUE
rs57492581	C	T	C	T	1.3	-0.0305	0.06374	0.04	FALSE	FALSE	FALSE	zU6dRW	0.0819	0.7095	4182	outcome	TRUE	reported	textfile	POLR1B	2.9e-13	0.178108	exposure	TRUE	reported	REYeMe	textfile	2	TRUE
rs60375821	T	C	T	C	-0.4	0.0673	0.11554	0.1	FALSE	FALSE	FALSE	zU6dRW	0.0508	0.1854	4524	outcome	TRUE	reported	textfile	POLR1A	1.5e-06	0.0831387	exposure	TRUE	reported	REYeMe	textfile	2	TRUE
rs60818406	C	T	C	T	0.52	-0.013	0.17721	0.19	FALSE	FALSE	FALSE	zU6dRW	0.0432	0.7641	4154	outcome	TRUE	reported	textfile	POLR1B	1.6e-05	0.120525	exposure	TRUE	reported	REYeMe	textfile	2	TRUE
rs8106228	A	G	A	G	-0.32	0.0411	0.244327	0.19	FALSE	FALSE	FALSE	zU6dRW	0.0406	0.3113	4524	outcome	TRUE	reported	textfile	CD3EAP	2.3e-05	0.0755861	exposure	TRUE	reported	REYeMe	textfile	2	TRUE
Muscle skeletal-Longevity 90p
SNP	effect_allele.exposure	other_allele.exposure	effect_allele.outcome	other_allele.outcome	beta.exposure	beta.outcome	eaf.exposure	eaf.outcome	remove	palindromic	ambiguous	id.outcome	se.outcome	pval.outcome	samplesize.outcome	outcome	mr_keep.outcome	pval_origin.outcome	data_source.outcome	gene.exposure	pval.exposure	se.exposure	exposure	mr_keep.exposure	pval_origin.exposure	id.exposure	data_source.exposure	action	mr_keep
rs10401973	T	C	T	C	-0.34	0.0414	0.418067	0.5	FALSE	FALSE	FALSE	sJvrCw	0.0216	0.05495	11050	outcome	TRUE	reported	textfile	CD3EAP	2.3e-27	0.0313741	exposure	TRUE	reported	QsQVkN	textfile	2	TRUE
rs10415949	G	A	G	A	-0.18	0.0568	0.323764	0.24	FALSE	FALSE	FALSE	sJvrCw	0.0227	0.01229	11615	outcome	TRUE	reported	textfile	CD3EAP	2.1e-06	0.0379462	exposure	TRUE	reported	QsQVkN	textfile	2	TRUE
rs10419767	A	T	A	T	-0.32	0.0084	0.150144	0.07	FALSE	TRUE	FALSE	sJvrCw	0.0505	0.8676	10510	outcome	TRUE	reported	textfile	CD3EAP	2.9e-07	0.0623802	exposure	TRUE	reported	QsQVkN	textfile	2	TRUE
rs10814575	A	G	A	G	0.27	-0.0267	0.483538	0.57	FALSE	FALSE	FALSE	sJvrCw	0.0198	0.1783	11615	outcome	TRUE	reported	textfile	POLR1E	7.2e-19	0.0304336	exposure	TRUE	reported	QsQVkN	textfile	2	TRUE
rs10950741	T	C	T	C	0.13	0.0183	0.148453	0.15	FALSE	FALSE	FALSE	sJvrCw	0.0282	0.5177	11615	outcome	TRUE	reported	textfile	TWISTNB	0.0001	0.0334139	exposure	TRUE	reported	QsQVkN	textfile	2	TRUE
rs10973605	G	C	G	C	-0.23	-0.0616	0.090172	0.1	FALSE	TRUE	FALSE	sJvrCw	0.0343	0.07259	11615	outcome	TRUE	reported	textfile	POLR1E	7.7e-05	0.0581756	exposure	TRUE	reported	QsQVkN	textfile	2	TRUE
rs11127002	T	G	T	G	0.077	0.005	0.449546	0.45	FALSE	FALSE	FALSE	sJvrCw	0.0201	0.8029	11050	outcome	TRUE	reported	textfile	POLR1A	0.00011	0.01991	exposure	TRUE	reported	QsQVkN	textfile	2	TRUE
rs111972324	A	C	A	C	-0.36	0.0242	0.023759	0.03	FALSE	FALSE	FALSE	sJvrCw	0.0603	0.6888	10867	outcome	TRUE	reported	textfile	POLR1E	5.4e-05	0.0891618	exposure	TRUE	reported	QsQVkN	textfile	2	TRUE
rs113279421	A	G	A	G	-0.62	0.169	0.016585	0.02	FALSE	FALSE	FALSE	sJvrCw	0.0933	0.06995	9765	outcome	TRUE	reported	textfile	POLR1E	3.5e-07	0.121704	exposure	TRUE	reported	QsQVkN	textfile	2	TRUE
rs113380992	C	T	C	T	-0.34	-0.2903	0.007105	0.01	FALSE	FALSE	FALSE	sJvrCw	0.1576	0.06552	6176	outcome	TRUE	reported	textfile	POLR1A	8.4e-05	0.0864548	exposure	TRUE	reported	QsQVkN	textfile	2	TRUE
rs114802991	A	G	A	G	0.52	0.1822	0.0128	0.03	FALSE	FALSE	FALSE	sJvrCw	0.0933	0.05089	5891	outcome	TRUE	reported	textfile	ZNRD1	6.8e-13	0.0723891	exposure	TRUE	reported	QsQVkN	textfile	2	TRUE
rs116856032	C	G	C	G	-0.26	0.0726	0.051559	0.08	FALSE	TRUE	FALSE	sJvrCw	0.0413	0.07858	11050	outcome	TRUE	reported	textfile	CD3EAP	5.5e-05	0.0644634	exposure	TRUE	reported	QsQVkN	textfile	2	TRUE
rs117584411	T	C	T	C	0.26	0.0492	0.024588	0.03	FALSE	FALSE	FALSE	sJvrCw	0.0733	0.5019	10718	outcome	TRUE	reported	textfile	TWISTNB	0.00015	0.0685822	exposure	TRUE	reported	QsQVkN	textfile	2	TRUE
rs12124	T	A	T	A	0.35	0.1012	0.128849	0.01	FALSE	TRUE	FALSE	sJvrCw	0.132	0.4433	6138	outcome	TRUE	reported	textfile	POLR1A	9.5e-16	0.0435695	exposure	TRUE	reported	QsQVkN	textfile	2	TRUE
rs12555254	C	A	C	A	-0.29	0.0025	0.113329	0.12	FALSE	FALSE	FALSE	sJvrCw	0.0322	0.9381	11615	outcome	TRUE	reported	textfile	POLR1E	4e-09	0.0492846	exposure	TRUE	reported	QsQVkN	textfile	2	TRUE
rs13284165	T	A	T	A	0.12	0.0071	0.330812	0.44	FALSE	TRUE	TRUE	sJvrCw	0.0211	0.7355	11050	outcome	TRUE	reported	textfile	POLR1E	0.00011	0.0310286	exposure	TRUE	reported	QsQVkN	textfile	2	FALSE
rs144968911	G	A	G	A	-0.39	0.2266	0.00395	0.01	FALSE	FALSE	FALSE	sJvrCw	0.1176	0.05389	7664	outcome	TRUE	reported	textfile	POLR1A	4.9e-06	0.0853574	exposure	TRUE	reported	QsQVkN	textfile	2	TRUE
rs147387435	A	C	A	C	-0.56	-0.0961	0.009268	0.01	FALSE	FALSE	FALSE	sJvrCw	0.1073	0.3702	7878	outcome	TRUE	reported	textfile	CD3EAP	1.6e-05	0.129796	exposure	TRUE	reported	QsQVkN	textfile	2	TRUE
rs148353045	C	G	C	G	-0.51	0.0721	0.015346	0.03	FALSE	TRUE	FALSE	sJvrCw	0.0682	0.2906	10171	outcome	TRUE	reported	textfile	POLR1E	4.7e-07	0.101227	exposure	TRUE	reported	QsQVkN	textfile	2	TRUE
rs17026666	C	A	C	A	-0.15	0.0304	0.073808	0.06	FALSE	FALSE	FALSE	sJvrCw	0.0411	0.4597	11615	outcome	TRUE	reported	textfile	POLR1A	4.6e-05	0.0368092	exposure	TRUE	reported	QsQVkN	textfile	2	TRUE
rs1887454	C	T	C	T	-0.15	0.0648	0.496444	0.52	FALSE	FALSE	FALSE	sJvrCw	0.0212	0.002191	11050	outcome	TRUE	reported	textfile	POLR1E	5.8e-07	0.0300134	exposure	TRUE	reported	QsQVkN	textfile	2	TRUE
rs2072185	A	G	A	G	0.17	0.0303	0.264177	0.16	FALSE	FALSE	FALSE	sJvrCw	0.027	0.2622	11615	outcome	TRUE	reported	textfile	TWISTNB	1.3e-07	0.032204	exposure	TRUE	reported	QsQVkN	textfile	2	TRUE
rs2390147	G	A	G	A	0.13	0.0335	0.171457	0.18	FALSE	FALSE	FALSE	sJvrCw	0.0255	0.1893	11615	outcome	TRUE	reported	textfile	TWISTNB	3.6e-05	0.0314636	exposure	TRUE	reported	QsQVkN	textfile	2	TRUE
rs2717369	C	T	C	T	-0.096	-0.0324	0.350246	0.51	FALSE	FALSE	FALSE	sJvrCw	0.0198	0.101	11050	outcome	TRUE	reported	textfile	TWISTNB	0.0001	0.0246749	exposure	TRUE	reported	QsQVkN	textfile	2	TRUE
rs2768659	G	A	G	A	-0.13	0.0442	0.436794	0.68	FALSE	FALSE	FALSE	sJvrCw	0.0206	0.03203	11615	outcome	TRUE	reported	textfile	POLR1E	0.0001	0.0334139	exposure	TRUE	reported	QsQVkN	textfile	2	TRUE
rs28716551	T	C	T	C	0.16	0.0031	0.173375	0.21	FALSE	FALSE	FALSE	sJvrCw	0.0265	0.9066	11050	outcome	TRUE	reported	textfile	POLR1E	2.4e-05	0.0378788	exposure	TRUE	reported	QsQVkN	textfile	2	TRUE
rs2982836	A	G	A	G	0.11	0.0284	0.275941	0.28	FALSE	FALSE	FALSE	sJvrCw	0.0256	0.2681	8400	outcome	TRUE	reported	textfile	ZNRD1	0.00042	0.0311863	exposure	TRUE	reported	QsQVkN	textfile	2	TRUE
rs344818	G	A	G	A	-0.14	0.0025	0.439523	0.47	FALSE	FALSE	FALSE	sJvrCw	0.0208	0.9052	11050	outcome	TRUE	reported	textfile	CD3EAP	2.8e-05	0.0334197	exposure	TRUE	reported	QsQVkN	textfile	2	TRUE
rs3810366	C	G	C	G	-0.19	0.0259	0.424521	0.44	FALSE	TRUE	TRUE	sJvrCw	0.02	0.1966	11050	outcome	TRUE	reported	textfile	CD3EAP	6.7e-09	0.0327684	exposure	TRUE	reported	QsQVkN	textfile	2	FALSE
rs4832240	T	C	T	C	0.092	0.024	0.268528	0.34	FALSE	FALSE	FALSE	sJvrCw	0.0204	0.2396	11615	outcome	TRUE	reported	textfile	POLR1A	1.1e-05	0.0209256	exposure	TRUE	reported	QsQVkN	textfile	2	TRUE
rs4878697	T	C	T	C	0.21	-0.0359	0.498117	0.56	FALSE	FALSE	FALSE	sJvrCw	0.0208	0.08332	11050	outcome	TRUE	reported	textfile	POLR1E	1.1e-11	0.0309152	exposure	TRUE	reported	QsQVkN	textfile	2	TRUE
rs60375821	T	C	T	C	-0.13	0.0312	0.11554	0.1	FALSE	FALSE	FALSE	sJvrCw	0.033	0.3436	11615	outcome	TRUE	reported	textfile	POLR1A	0.00012	0.0338002	exposure	TRUE	reported	QsQVkN	textfile	2	TRUE
rs60600938	A	C	A	C	-0.28	-0.0358	0.226584	0.05	FALSE	FALSE	FALSE	sJvrCw	0.0498	0.4725	11615	outcome	TRUE	reported	textfile	CD3EAP	3.4e-05	0.0675533	exposure	TRUE	reported	QsQVkN	textfile	2	TRUE
rs62536941	A	G	A	G	-0.19	-0.0288	0.148538	0.17	FALSE	FALSE	FALSE	sJvrCw	0.0266	0.2794	11615	outcome	TRUE	reported	textfile	POLR1E	5.6e-06	0.0418414	exposure	TRUE	reported	QsQVkN	textfile	2	TRUE
rs6542060	A	G	A	G	0.074	0.0026	0.403683	0.37	FALSE	FALSE	FALSE	sJvrCw	0.0199	0.8963	11615	outcome	TRUE	reported	textfile	POLR1B	7e-05	0.0186103	exposure	TRUE	reported	QsQVkN	textfile	2	TRUE
rs6542066	G	C	G	C	-0.08	-0.0342	0.223437	0.25	FALSE	TRUE	FALSE	sJvrCw	0.023	0.1368	11615	outcome	TRUE	reported	textfile	POLR1B	0.00024	0.0217823	exposure	TRUE	reported	QsQVkN	textfile	2	TRUE
rs7031565	C	A	C	A	-0.28	0.0319	0.24065	0.29	FALSE	FALSE	FALSE	sJvrCw	0.0224	0.1539	11050	outcome	TRUE	reported	textfile	POLR1E	5.1e-17	0.0333955	exposure	TRUE	reported	QsQVkN	textfile	2	TRUE
rs74253362	G	C	G	C	-0.38	-0.0046	0.03917	0.03	FALSE	TRUE	FALSE	sJvrCw	0.0561	0.935	11202	outcome	TRUE	reported	textfile	CD3EAP	2.8e-05	0.0907105	exposure	TRUE	reported	QsQVkN	textfile	2	TRUE
rs75150024	C	T	C	T	-0.16	-0.0743	0.064965	0.04	FALSE	FALSE	FALSE	sJvrCw	0.0578	0.1987	11432	outcome	TRUE	reported	textfile	POLR1A	8.3e-05	0.0406549	exposure	TRUE	reported	QsQVkN	textfile	2	TRUE
rs75816342	A	G	A	G	-0.28	-0.0904	0.03135	0.06	FALSE	FALSE	FALSE	sJvrCw	0.046	0.04938	11050	outcome	TRUE	reported	textfile	CD3EAP	0.00011	0.0724	exposure	TRUE	reported	QsQVkN	textfile	2	TRUE
rs7599498	C	T	C	T	-0.099	-0.0288	0.143059	0.13	FALSE	FALSE	FALSE	sJvrCw	0.0285	0.3109	11615	outcome	TRUE	reported	textfile	POLR1A	0.00019	0.0265277	exposure	TRUE	reported	QsQVkN	textfile	2	TRUE
rs78134137	C	A	C	A	-0.21	-0.014	0.029122	0.03	FALSE	FALSE	FALSE	sJvrCw	0.0726	0.8471	11124	outcome	TRUE	reported	textfile	POLR1A	4.4e-05	0.0514025	exposure	TRUE	reported	QsQVkN	textfile	2	TRUE
rs79945793	A	G	A	G	-0.39	0.0839	0.049487	0.05	FALSE	FALSE	FALSE	sJvrCw	0.0474	0.07643	11432	outcome	TRUE	reported	textfile	POLR1E	3e-06	0.0834971	exposure	TRUE	reported	QsQVkN	textfile	2	TRUE
rs8103655	C	T	C	T	-0.14	0.0298	0.494447	0.46	FALSE	FALSE	FALSE	sJvrCw	0.0199	0.1345	11615	outcome	TRUE	reported	textfile	CD3EAP	3.8e-05	0.0339862	exposure	TRUE	reported	QsQVkN	textfile	2	TRUE
rs8110514	C	G	C	G	-0.24	-0.0239	0.30989	0.25	FALSE	TRUE	FALSE	sJvrCw	0.0243	0.3249	11050	outcome	TRUE	reported	textfile	CD3EAP	3e-11	0.0361088	exposure	TRUE	reported	QsQVkN	textfile	2	TRUE
rs928911	T	C	T	C	-0.41	0.0375	0.064157	0.05	FALSE	FALSE	FALSE	sJvrCw	0.0483	0.4375	11075	outcome	TRUE	reported	textfile	CD3EAP	1.7e-08	0.0726944	exposure	TRUE	reported	QsQVkN	textfile	2	TRUE
rs9789254	A	G	A	G	-0.15	0.0173	0.480832	0.58	FALSE	FALSE	FALSE	sJvrCw	0.0213	0.4156	11050	outcome	TRUE	reported	textfile	CD3EAP	1.4e-05	0.0345315	exposure	TRUE	reported	QsQVkN	textfile	2	TRUE
Muscle skeletal-Longevity 99p
SNP	effect_allele.exposure	other_allele.exposure	effect_allele.outcome	other_allele.outcome	beta.exposure	beta.outcome	eaf.exposure	eaf.outcome	remove	palindromic	ambiguous	id.outcome	se.outcome	pval.outcome	samplesize.outcome	outcome	mr_keep.outcome	pval_origin.outcome	data_source.outcome	gene.exposure	pval.exposure	se.exposure	exposure	mr_keep.exposure	pval_origin.exposure	id.exposure	data_source.exposure	action	mr_keep
rs10401973	T	C	T	C	-0.34	0.0608	0.418067	0.49	FALSE	FALSE	FALSE	EmFe97	0.0343	0.07653	4154	outcome	TRUE	reported	textfile	CD3EAP	2.3e-27	0.0313741	exposure	TRUE	reported	QsQVkN	textfile	2	TRUE
rs10415949	G	A	G	A	-0.18	0.0777	0.323764	0.24	FALSE	FALSE	FALSE	EmFe97	0.0351	0.02708	4524	outcome	TRUE	reported	textfile	CD3EAP	2.1e-06	0.0379462	exposure	TRUE	reported	QsQVkN	textfile	2	TRUE
rs10419767	A	T	A	T	-0.32	0.0875	0.150144	0.07	FALSE	TRUE	FALSE	EmFe97	0.0809	0.2795	3933	outcome	TRUE	reported	textfile	CD3EAP	2.9e-07	0.0623802	exposure	TRUE	reported	QsQVkN	textfile	2	TRUE
rs10814575	A	G	A	G	0.27	-0.0468	0.483538	0.58	FALSE	FALSE	FALSE	EmFe97	0.0312	0.1337	4524	outcome	TRUE	reported	textfile	POLR1E	7.2e-19	0.0304336	exposure	TRUE	reported	QsQVkN	textfile	2	TRUE
rs10950741	T	C	T	C	0.13	0.0197	0.148453	0.15	FALSE	FALSE	FALSE	EmFe97	0.0448	0.6604	4524	outcome	TRUE	reported	textfile	TWISTNB	0.0001	0.0334139	exposure	TRUE	reported	QsQVkN	textfile	2	TRUE
rs10973605	G	C	G	C	-0.23	-0.01	0.090172	0.09	FALSE	TRUE	FALSE	EmFe97	0.0555	0.8575	4524	outcome	TRUE	reported	textfile	POLR1E	7.7e-05	0.0581756	exposure	TRUE	reported	QsQVkN	textfile	2	TRUE
rs11127002	T	G	T	G	0.077	0.0143	0.449546	0.45	FALSE	FALSE	FALSE	EmFe97	0.0329	0.6639	4154	outcome	TRUE	reported	textfile	POLR1A	0.00011	0.01991	exposure	TRUE	reported	QsQVkN	textfile	2	TRUE
rs111972324	A	C	A	C	-0.36	0.0844	0.023759	0.03	FALSE	FALSE	FALSE	EmFe97	0.1058	0.4254	3545	outcome	TRUE	reported	textfile	POLR1E	5.4e-05	0.0891618	exposure	TRUE	reported	QsQVkN	textfile	2	TRUE
rs113279421	A	G	A	G	-0.62	0.2541	0.016585	0.02	FALSE	FALSE	FALSE	EmFe97	0.17	0.135	2902	outcome	TRUE	reported	textfile	POLR1E	3.5e-07	0.121704	exposure	TRUE	reported	QsQVkN	textfile	2	TRUE
rs113380992	C	T	C	T	-0.34	-0.2572	0.007105	0.01	FALSE	FALSE	FALSE	EmFe97	0.2724	0.345	2409	outcome	TRUE	reported	textfile	POLR1A	8.4e-05	0.0864548	exposure	TRUE	reported	QsQVkN	textfile	2	TRUE
rs114802991	A	G	A	G	0.52	0.3221	0.0128	0.04	FALSE	FALSE	FALSE	EmFe97	0.1358	0.01767	2273	outcome	TRUE	reported	textfile	ZNRD1	6.8e-13	0.0723891	exposure	TRUE	reported	QsQVkN	textfile	2	TRUE
rs116856032	C	G	C	G	-0.26	0.0698	0.051559	0.08	FALSE	TRUE	FALSE	EmFe97	0.0701	0.3196	3801	outcome	TRUE	reported	textfile	CD3EAP	5.5e-05	0.0644634	exposure	TRUE	reported	QsQVkN	textfile	2	TRUE
rs117584411	T	C	T	C	0.26	-0.086	0.024588	0.03	FALSE	FALSE	FALSE	EmFe97	0.129	0.5051	3322	outcome	TRUE	reported	textfile	TWISTNB	0.00015	0.0685822	exposure	TRUE	reported	QsQVkN	textfile	2	TRUE
rs12555254	C	A	C	A	-0.29	0.0847	0.113329	0.12	FALSE	FALSE	FALSE	EmFe97	0.0503	0.09251	4524	outcome	TRUE	reported	textfile	POLR1E	4e-09	0.0492846	exposure	TRUE	reported	QsQVkN	textfile	2	TRUE
rs13284165	T	A	T	A	0.12	-0.0356	0.330812	0.44	FALSE	TRUE	TRUE	EmFe97	0.0336	0.2892	4154	outcome	TRUE	reported	textfile	POLR1E	0.00011	0.0310286	exposure	TRUE	reported	QsQVkN	textfile	2	FALSE
rs148353045	C	G	C	G	-0.51	0.1995	0.015346	0.03	FALSE	TRUE	FALSE	EmFe97	0.1154	0.0838	3545	outcome	TRUE	reported	textfile	POLR1E	4.7e-07	0.101227	exposure	TRUE	reported	QsQVkN	textfile	2	TRUE
rs17026666	C	A	C	A	-0.15	0.1135	0.073808	0.06	FALSE	FALSE	FALSE	EmFe97	0.0637	0.07502	4303	outcome	TRUE	reported	textfile	POLR1A	4.6e-05	0.0368092	exposure	TRUE	reported	QsQVkN	textfile	2	TRUE
rs1887454	C	T	C	T	-0.15	0.1276	0.496444	0.51	FALSE	FALSE	FALSE	EmFe97	0.0342	0.000189	4154	outcome	TRUE	reported	textfile	POLR1E	5.8e-07	0.0300134	exposure	TRUE	reported	QsQVkN	textfile	2	TRUE
rs2072185	A	G	A	G	0.17	0.0968	0.264177	0.16	FALSE	FALSE	FALSE	EmFe97	0.0423	0.02196	4524	outcome	TRUE	reported	textfile	TWISTNB	1.3e-07	0.032204	exposure	TRUE	reported	QsQVkN	textfile	2	TRUE
rs2390147	G	A	G	A	0.13	0.0032	0.171457	0.17	FALSE	FALSE	FALSE	EmFe97	0.0397	0.9355	4524	outcome	TRUE	reported	textfile	TWISTNB	3.6e-05	0.0314636	exposure	TRUE	reported	QsQVkN	textfile	2	TRUE
rs2717369	C	T	C	T	-0.096	0.0263	0.350246	0.51	FALSE	FALSE	FALSE	EmFe97	0.0317	0.407	4154	outcome	TRUE	reported	textfile	TWISTNB	0.0001	0.0246749	exposure	TRUE	reported	QsQVkN	textfile	2	TRUE
rs2768659	G	A	G	A	-0.13	0.064	0.436794	0.67	FALSE	FALSE	FALSE	EmFe97	0.0323	0.04766	4524	outcome	TRUE	reported	textfile	POLR1E	0.0001	0.0334139	exposure	TRUE	reported	QsQVkN	textfile	2	TRUE
rs28716551	T	C	T	C	0.16	0.0397	0.173375	0.21	FALSE	FALSE	FALSE	EmFe97	0.0428	0.3538	4154	outcome	TRUE	reported	textfile	POLR1E	2.4e-05	0.0378788	exposure	TRUE	reported	QsQVkN	textfile	2	TRUE
rs2982836	A	G	A	G	0.11	0.0984	0.275941	0.32	FALSE	FALSE	FALSE	EmFe97	0.0412	0.01699	2750	outcome	TRUE	reported	textfile	ZNRD1	0.00042	0.0311863	exposure	TRUE	reported	QsQVkN	textfile	2	TRUE
rs344818	G	A	G	A	-0.14	0.0014	0.439523	0.46	FALSE	FALSE	FALSE	EmFe97	0.0339	0.9678	4154	outcome	TRUE	reported	textfile	CD3EAP	2.8e-05	0.0334197	exposure	TRUE	reported	QsQVkN	textfile	2	TRUE
rs3810366	C	G	C	G	-0.19	0.0716	0.424521	0.44	FALSE	TRUE	TRUE	EmFe97	0.0321	0.026	4154	outcome	TRUE	reported	textfile	CD3EAP	6.7e-09	0.0327684	exposure	TRUE	reported	QsQVkN	textfile	2	FALSE
rs4832240	T	C	T	C	0.092	-0.0158	0.268528	0.34	FALSE	FALSE	FALSE	EmFe97	0.0319	0.6204	4524	outcome	TRUE	reported	textfile	POLR1A	1.1e-05	0.0209256	exposure	TRUE	reported	QsQVkN	textfile	2	TRUE
rs4878697	T	C	T	C	0.21	-0.0744	0.498117	0.56	FALSE	FALSE	FALSE	EmFe97	0.0333	0.0256	4154	outcome	TRUE	reported	textfile	POLR1E	1.1e-11	0.0309152	exposure	TRUE	reported	QsQVkN	textfile	2	TRUE
rs60375821	T	C	T	C	-0.13	0.0673	0.11554	0.1	FALSE	FALSE	FALSE	EmFe97	0.0508	0.1854	4524	outcome	TRUE	reported	textfile	POLR1A	0.00012	0.0338002	exposure	TRUE	reported	QsQVkN	textfile	2	TRUE
rs60600938	A	C	A	C	-0.28	0.0863	0.226584	0.04	FALSE	FALSE	FALSE	EmFe97	0.0818	0.2914	4050	outcome	TRUE	reported	textfile	CD3EAP	3.4e-05	0.0675533	exposure	TRUE	reported	QsQVkN	textfile	2	TRUE
rs62536941	A	G	A	G	-0.19	-0.0823	0.148538	0.17	FALSE	FALSE	FALSE	EmFe97	0.0422	0.05106	4524	outcome	TRUE	reported	textfile	POLR1E	5.6e-06	0.0418414	exposure	TRUE	reported	QsQVkN	textfile	2	TRUE
rs6542060	A	G	A	G	0.074	0.0174	0.403683	0.36	FALSE	FALSE	FALSE	EmFe97	0.0312	0.5772	4524	outcome	TRUE	reported	textfile	POLR1B	7e-05	0.0186103	exposure	TRUE	reported	QsQVkN	textfile	2	TRUE
rs6542066	G	C	G	C	-0.08	-0.011	0.223437	0.25	FALSE	TRUE	FALSE	EmFe97	0.0357	0.758	4524	outcome	TRUE	reported	textfile	POLR1B	0.00024	0.0217823	exposure	TRUE	reported	QsQVkN	textfile	2	TRUE
rs7031565	C	A	C	A	-0.28	0.0874	0.24065	0.29	FALSE	FALSE	FALSE	EmFe97	0.0364	0.01624	4154	outcome	TRUE	reported	textfile	POLR1E	5.1e-17	0.0333955	exposure	TRUE	reported	QsQVkN	textfile	2	TRUE
rs74253362	G	C	G	C	-0.38	0.0119	0.03917	0.03	FALSE	TRUE	FALSE	EmFe97	0.0919	0.8969	4047	outcome	TRUE	reported	textfile	CD3EAP	2.8e-05	0.0907105	exposure	TRUE	reported	QsQVkN	textfile	2	TRUE
rs75150024	C	T	C	T	-0.16	-0.0927	0.064965	0.03	FALSE	FALSE	FALSE	EmFe97	0.0962	0.3351	3915	outcome	TRUE	reported	textfile	POLR1A	8.3e-05	0.0406549	exposure	TRUE	reported	QsQVkN	textfile	2	TRUE
rs75816342	A	G	A	G	-0.28	-0.0911	0.03135	0.06	FALSE	FALSE	FALSE	EmFe97	0.0755	0.2281	3933	outcome	TRUE	reported	textfile	CD3EAP	0.00011	0.0724	exposure	TRUE	reported	QsQVkN	textfile	2	TRUE
rs7599498	C	T	C	T	-0.099	-0.0274	0.143059	0.13	FALSE	FALSE	FALSE	EmFe97	0.0449	0.5427	4524	outcome	TRUE	reported	textfile	POLR1A	0.00019	0.0265277	exposure	TRUE	reported	QsQVkN	textfile	2	TRUE
rs78134137	C	A	C	A	-0.21	0.1324	0.029122	0.02	FALSE	FALSE	FALSE	EmFe97	0.1364	0.3316	3272	outcome	TRUE	reported	textfile	POLR1A	4.4e-05	0.0514025	exposure	TRUE	reported	QsQVkN	textfile	2	TRUE
rs79945793	A	G	A	G	-0.39	0.0322	0.049487	0.05	FALSE	FALSE	FALSE	EmFe97	0.0831	0.6979	3680	outcome	TRUE	reported	textfile	POLR1E	3e-06	0.0834971	exposure	TRUE	reported	QsQVkN	textfile	2	TRUE
rs8103655	C	T	C	T	-0.14	0.059	0.494447	0.45	FALSE	FALSE	FALSE	EmFe97	0.0311	0.05755	4524	outcome	TRUE	reported	textfile	CD3EAP	3.8e-05	0.0339862	exposure	TRUE	reported	QsQVkN	textfile	2	TRUE
rs8110514	C	G	C	G	-0.24	0.0088	0.30989	0.25	FALSE	TRUE	FALSE	EmFe97	0.0397	0.8256	4154	outcome	TRUE	reported	textfile	CD3EAP	3e-11	0.0361088	exposure	TRUE	reported	QsQVkN	textfile	2	TRUE
rs928911	T	C	T	C	-0.41	0.0649	0.064157	0.05	FALSE	FALSE	FALSE	EmFe97	0.0777	0.4034	4050	outcome	TRUE	reported	textfile	CD3EAP	1.7e-08	0.0726944	exposure	TRUE	reported	QsQVkN	textfile	2	TRUE
rs9789254	A	G	A	G	-0.15	0.0543	0.480832	0.58	FALSE	FALSE	FALSE	EmFe97	0.0341	0.1115	4154	outcome	TRUE	reported	textfile	CD3EAP	1.4e-05	0.0345315	exposure	TRUE	reported	QsQVkN	textfile	2	TRUE
Pancreas-Longevity 90p
SNP	effect_allele.exposure	other_allele.exposure	effect_allele.outcome	other_allele.outcome	beta.exposure	beta.outcome	eaf.exposure	eaf.outcome	remove	palindromic	ambiguous	id.outcome	se.outcome	pval.outcome	samplesize.outcome	outcome	mr_keep.outcome	pval_origin.outcome	data_source.outcome	gene.exposure	pval.exposure	se.exposure	exposure	mr_keep.exposure	pval_origin.exposure	id.exposure	data_source.exposure	action	mr_keep
rs10153558	A	G	A	G	0.32	-0.0195	0.312504	0.23	FALSE	FALSE	FALSE	f6xEIV	0.023	0.397	11615	outcome	TRUE	reported	textfile	POLR1B	1.3e-06	0.0661191	exposure	TRUE	reported	aGS6iz	textfile	2	TRUE
rs10758438	C	T	C	T	-0.14	0.0357	0.434021	0.49	FALSE	FALSE	FALSE	f6xEIV	0.0191	0.06202	11615	outcome	TRUE	reported	textfile	POLR1E	1.5e-07	0.0266537	exposure	TRUE	reported	aGS6iz	textfile	2	TRUE
rs117432766	A	G	A	G	0.65	0.1043	0.020832	0.02	FALSE	FALSE	FALSE	f6xEIV	0.0991	0.2923	6297	outcome	TRUE	reported	textfile	ZNRD1	6.8e-05	0.163186	exposure	TRUE	reported	aGS6iz	textfile	2	TRUE
rs144672004	G	C	G	C	1	0.0964	0.011377	0.02	FALSE	TRUE	FALSE	f6xEIV	0.1006	0.3377	9113	outcome	TRUE	reported	textfile	POLR1B	5.4e-05	0.247672	exposure	TRUE	reported	aGS6iz	textfile	2	TRUE
rs17026854	C	T	C	T	-0.35	0.1146	0.045689	0.04	FALSE	FALSE	FALSE	f6xEIV	0.0483	0.01763	11209	outcome	TRUE	reported	textfile	POLR1A	0.0001	0.0899606	exposure	TRUE	reported	aGS6iz	textfile	2	TRUE
rs2033770	T	C	T	C	0.17	0.0012	0.34718	0.72	FALSE	FALSE	FALSE	f6xEIV	0.0214	0.9569	11615	outcome	TRUE	reported	textfile	POLR1A	6.8e-05	0.0426795	exposure	TRUE	reported	aGS6iz	textfile	2	TRUE
rs2524005	A	G	A	G	0.2	-0.032	0.1747	0.2	FALSE	FALSE	FALSE	f6xEIV	0.0331	0.3326	7123	outcome	TRUE	reported	textfile	ZNRD1	3.1e-05	0.0480078	exposure	TRUE	reported	aGS6iz	textfile	2	TRUE
rs34725617	A	G	A	G	-0.26	0.0006	0.400537	0.52	FALSE	FALSE	FALSE	f6xEIV	0.0201	0.9751	11050	outcome	TRUE	reported	textfile	POLR1B	1.4e-05	0.0598546	exposure	TRUE	reported	aGS6iz	textfile	2	TRUE
rs4802252	C	T	C	T	-0.24	0.0472	0.448847	0.4	FALSE	FALSE	FALSE	f6xEIV	0.0206	0.02203	11050	outcome	TRUE	reported	textfile	CD3EAP	2.5e-05	0.0569422	exposure	TRUE	reported	aGS6iz	textfile	2	TRUE
rs58360798	C	T	C	T	0.35	0.009	0.219259	0.2	FALSE	FALSE	FALSE	f6xEIV	0.0244	0.7117	11615	outcome	TRUE	reported	textfile	POLR1B	3.9e-07	0.0689822	exposure	TRUE	reported	aGS6iz	textfile	2	TRUE
rs60064657	A	C	A	C	1	-0.0833	0.121605	0.02	FALSE	FALSE	FALSE	f6xEIV	0.0806	0.3018	10305	outcome	TRUE	reported	textfile	POLR1B	2.9e-06	0.213777	exposure	TRUE	reported	aGS6iz	textfile	2	TRUE
rs60375821	T	C	T	C	-0.29	0.0312	0.11554	0.1	FALSE	FALSE	FALSE	f6xEIV	0.033	0.3436	11615	outcome	TRUE	reported	textfile	POLR1A	1.3e-05	0.0665122	exposure	TRUE	reported	aGS6iz	textfile	2	TRUE
rs62157382	C	T	C	T	0.54	0.0278	0.046326	0.06	FALSE	FALSE	FALSE	f6xEIV	0.0417	0.5047	11615	outcome	TRUE	reported	textfile	POLR1B	5.7e-05	0.134165	exposure	TRUE	reported	aGS6iz	textfile	2	TRUE
rs62157489	T	C	T	C	1	-0.0649	0.018357	0.02	FALSE	FALSE	FALSE	f6xEIV	0.0739	0.3803	9740	outcome	TRUE	reported	textfile	POLR1B	2.7e-09	0.168099	exposure	TRUE	reported	aGS6iz	textfile	2	TRUE
rs62158651	T	C	T	C	0.94	0.0127	0.017537	0.03	FALSE	FALSE	FALSE	f6xEIV	0.0581	0.8265	11019	outcome	TRUE	reported	textfile	POLR1B	1.5e-08	0.166032	exposure	TRUE	reported	aGS6iz	textfile	2	TRUE
rs72831614	A	G	A	G	0.56	0.0432	0.057068	0.03	FALSE	FALSE	FALSE	f6xEIV	0.0569	0.4475	11019	outcome	TRUE	reported	textfile	POLR1B	2.8e-05	0.133679	exposure	TRUE	reported	aGS6iz	textfile	2	TRUE
rs7565645	G	T	G	T	0.31	0.0523	0.237021	0.93	FALSE	FALSE	FALSE	f6xEIV	0.0381	0.1695	11615	outcome	TRUE	reported	textfile	POLR1A	1e-05	0.0701806	exposure	TRUE	reported	aGS6iz	textfile	2	TRUE
rs75758970	A	G	A	G	-0.19	0.0505	0.113406	0.11	FALSE	FALSE	FALSE	f6xEIV	0.0319	0.1139	11615	outcome	TRUE	reported	textfile	POLR1E	7.7e-06	0.0424737	exposure	TRUE	reported	aGS6iz	textfile	2	TRUE
rs76158656	T	C	T	C	-0.49	0.0348	0.032095	0.04	FALSE	FALSE	FALSE	f6xEIV	0.0534	0.5145	11615	outcome	TRUE	reported	textfile	POLR1A	2.7e-07	0.0952702	exposure	TRUE	reported	aGS6iz	textfile	2	TRUE
Pancreas-Longevity 99p
SNP	effect_allele.exposure	other_allele.exposure	effect_allele.outcome	other_allele.outcome	beta.exposure	beta.outcome	eaf.exposure	eaf.outcome	remove	palindromic	ambiguous	id.outcome	se.outcome	pval.outcome	samplesize.outcome	outcome	mr_keep.outcome	pval_origin.outcome	data_source.outcome	gene.exposure	pval.exposure	se.exposure	exposure	mr_keep.exposure	pval_origin.exposure	id.exposure	data_source.exposure	action	mr_keep
rs10153558	A	G	A	G	0.32	0.0184	0.312504	0.22	FALSE	FALSE	FALSE	qRsW36	0.0363	0.6113	4524	outcome	TRUE	reported	textfile	POLR1B	1.3e-06	0.0661191	exposure	TRUE	reported	aGS6iz	textfile	2	TRUE
rs10758438	C	T	C	T	-0.14	0.0626	0.434021	0.49	FALSE	FALSE	FALSE	qRsW36	0.0297	0.03536	4524	outcome	TRUE	reported	textfile	POLR1E	1.5e-07	0.0266537	exposure	TRUE	reported	aGS6iz	textfile	2	TRUE
rs117432766	A	G	A	G	0.65	0.0078	0.020832	0.02	FALSE	FALSE	FALSE	qRsW36	0.1554	0.9598	2273	outcome	TRUE	reported	textfile	ZNRD1	6.8e-05	0.163186	exposure	TRUE	reported	aGS6iz	textfile	2	TRUE
rs144672004	G	C	G	C	1	0.1312	0.011377	0.02	FALSE	TRUE	FALSE	qRsW36	0.1879	0.4852	2829	outcome	TRUE	reported	textfile	POLR1B	5.4e-05	0.247672	exposure	TRUE	reported	aGS6iz	textfile	2	TRUE
rs17026854	C	T	C	T	-0.35	0.0798	0.045689	0.04	FALSE	FALSE	FALSE	qRsW36	0.077	0.2998	4182	outcome	TRUE	reported	textfile	POLR1A	0.0001	0.0899606	exposure	TRUE	reported	aGS6iz	textfile	2	TRUE
rs2033770	T	C	T	C	0.17	0.0039	0.34718	0.72	FALSE	FALSE	FALSE	qRsW36	0.0335	0.9062	4524	outcome	TRUE	reported	textfile	POLR1A	6.8e-05	0.0426795	exposure	TRUE	reported	aGS6iz	textfile	2	TRUE
rs2524005	A	G	A	G	0.2	0.0213	0.1747	0.18	FALSE	FALSE	FALSE	qRsW36	0.0562	0.7047	2330	outcome	TRUE	reported	textfile	ZNRD1	3.1e-05	0.0480078	exposure	TRUE	reported	aGS6iz	textfile	2	TRUE
rs34725617	A	G	A	G	-0.26	0.0175	0.400537	0.52	FALSE	FALSE	FALSE	qRsW36	0.0327	0.5934	4154	outcome	TRUE	reported	textfile	POLR1B	1.4e-05	0.0598546	exposure	TRUE	reported	aGS6iz	textfile	2	TRUE
rs4802252	C	T	C	T	-0.24	0.0821	0.448847	0.39	FALSE	FALSE	FALSE	qRsW36	0.033	0.01281	4154	outcome	TRUE	reported	textfile	CD3EAP	2.5e-05	0.0569422	exposure	TRUE	reported	aGS6iz	textfile	2	TRUE
rs58360798	C	T	C	T	0.35	-0.0234	0.219259	0.2	FALSE	FALSE	FALSE	qRsW36	0.038	0.5381	4524	outcome	TRUE	reported	textfile	POLR1B	3.9e-07	0.0689822	exposure	TRUE	reported	aGS6iz	textfile	2	TRUE
rs60064657	A	C	A	C	1	-0.0811	0.121605	0.02	FALSE	FALSE	FALSE	qRsW36	0.1372	0.5546	3272	outcome	TRUE	reported	textfile	POLR1B	2.9e-06	0.213777	exposure	TRUE	reported	aGS6iz	textfile	2	TRUE
rs60375821	T	C	T	C	-0.29	0.0673	0.11554	0.1	FALSE	FALSE	FALSE	qRsW36	0.0508	0.1854	4524	outcome	TRUE	reported	textfile	POLR1A	1.3e-05	0.0665122	exposure	TRUE	reported	aGS6iz	textfile	2	TRUE
rs62157382	C	T	C	T	0.54	-0.0066	0.046326	0.06	FALSE	FALSE	FALSE	qRsW36	0.0672	0.9213	4303	outcome	TRUE	reported	textfile	POLR1B	5.7e-05	0.134165	exposure	TRUE	reported	aGS6iz	textfile	2	TRUE
rs62157489	T	C	T	C	1	0.0276	0.018357	0.02	FALSE	FALSE	FALSE	qRsW36	0.1248	0.8248	3322	outcome	TRUE	reported	textfile	POLR1B	2.7e-09	0.168099	exposure	TRUE	reported	aGS6iz	textfile	2	TRUE
rs62158651	T	C	T	C	0.94	0.0864	0.017537	0.03	FALSE	FALSE	FALSE	qRsW36	0.0937	0.3569	3915	outcome	TRUE	reported	textfile	POLR1B	1.5e-08	0.166032	exposure	TRUE	reported	aGS6iz	textfile	2	TRUE
rs72831614	A	G	A	G	0.56	-0.058	0.057068	0.03	FALSE	FALSE	FALSE	qRsW36	0.0923	0.5297	3915	outcome	TRUE	reported	textfile	POLR1B	2.8e-05	0.133679	exposure	TRUE	reported	aGS6iz	textfile	2	TRUE
rs7565645	G	T	G	T	0.31	0.0462	0.237021	0.93	FALSE	FALSE	FALSE	qRsW36	0.0605	0.4445	4303	outcome	TRUE	reported	textfile	POLR1A	1e-05	0.0701806	exposure	TRUE	reported	aGS6iz	textfile	2	TRUE
rs75758970	A	G	A	G	-0.19	0.0597	0.113406	0.11	FALSE	FALSE	FALSE	qRsW36	0.051	0.2411	4524	outcome	TRUE	reported	textfile	POLR1E	7.7e-06	0.0424737	exposure	TRUE	reported	aGS6iz	textfile	2	TRUE
rs76158656	T	C	T	C	-0.49	0.0993	0.032095	0.03	FALSE	FALSE	FALSE	qRsW36	0.0933	0.2874	3915	outcome	TRUE	reported	textfile	POLR1A	2.7e-07	0.0952702	exposure	TRUE	reported	aGS6iz	textfile	2	TRUE
Colon transverse-Longevity 90p
SNP	effect_allele.exposure	other_allele.exposure	effect_allele.outcome	other_allele.outcome	beta.exposure	beta.outcome	eaf.exposure	eaf.outcome	remove	palindromic	ambiguous	id.outcome	se.outcome	pval.outcome	samplesize.outcome	outcome	mr_keep.outcome	pval_origin.outcome	data_source.outcome	gene.exposure	pval.exposure	se.exposure	exposure	mr_keep.exposure	pval_origin.exposure	id.exposure	data_source.exposure	action	mr_keep
rs10202834	T	C	T	C	-0.22	-0.0069	0.450328	0.59	FALSE	FALSE	FALSE	33JtIo	0.0214	0.7485	11050	outcome	TRUE	reported	textfile	POLR1B	2.8e-08	0.0396146	exposure	TRUE	reported	fKkuDY	textfile	2	TRUE
rs1046282	G	A	G	A	-0.19	0.0285	0.293088	0.25	FALSE	FALSE	FALSE	33JtIo	0.0225	0.2053	11615	outcome	TRUE	reported	textfile	CD3EAP	5.9e-05	0.0473016	exposure	TRUE	reported	fKkuDY	textfile	2	TRUE
rs11127002	T	G	T	G	0.12	0.005	0.449546	0.45	FALSE	FALSE	FALSE	33JtIo	0.0201	0.8029	11050	outcome	TRUE	reported	textfile	POLR1A	0.00011	0.0310286	exposure	TRUE	reported	fKkuDY	textfile	2	TRUE
rs114068877	A	G	A	G	-0.56	0.0523	0.016845	0.02	FALSE	FALSE	FALSE	33JtIo	0.0756	0.4891	10305	outcome	TRUE	reported	textfile	POLR1A	5.8e-09	0.0961799	exposure	TRUE	reported	fKkuDY	textfile	2	TRUE
rs114534559	T	C	T	C	-0.43	-0.1495	0.022145	0.03	FALSE	FALSE	FALSE	33JtIo	0.0632	0.01794	10613	outcome	TRUE	reported	textfile	POLR1A	6.6e-05	0.107762	exposure	TRUE	reported	fKkuDY	textfile	2	TRUE
rs114802991	A	G	A	G	0.34	0.1822	0.0128	0.03	FALSE	FALSE	FALSE	33JtIo	0.0933	0.05089	5891	outcome	TRUE	reported	textfile	ZNRD1	0.00011	0.0879143	exposure	TRUE	reported	fKkuDY	textfile	2	TRUE
rs115235811	T	C	T	C	-0.25	0.0791	0.062982	0.08	FALSE	FALSE	FALSE	33JtIo	0.0367	0.03134	11615	outcome	TRUE	reported	textfile	POLR1A	7.6e-05	0.0631844	exposure	TRUE	reported	fKkuDY	textfile	2	TRUE
rs11680446	C	G	C	G	-0.17	-0.0442	0.362327	0.26	FALSE	TRUE	FALSE	33JtIo	0.0229	0.05397	11050	outcome	TRUE	reported	textfile	POLR1B	4.6e-05	0.041717	exposure	TRUE	reported	fKkuDY	textfile	2	TRUE
rs144672004	G	C	G	C	0.85	0.0964	0.011377	0.02	FALSE	TRUE	FALSE	33JtIo	0.1006	0.3377	9113	outcome	TRUE	reported	textfile	POLR1B	1e-07	0.159573	exposure	TRUE	reported	fKkuDY	textfile	2	TRUE
rs145935842	G	A	G	A	0.83	0.123	0.0086	0.01	FALSE	FALSE	FALSE	33JtIo	0.1217	0.3122	6679	outcome	TRUE	reported	textfile	POLR1B	1.4e-06	0.172021	exposure	TRUE	reported	fKkuDY	textfile	2	TRUE
rs2033770	T	C	T	C	0.15	0.0012	0.34718	0.72	FALSE	FALSE	FALSE	33JtIo	0.0214	0.9569	11615	outcome	TRUE	reported	textfile	POLR1A	5.6e-07	0.0299729	exposure	TRUE	reported	fKkuDY	textfile	2	TRUE
rs2982836	A	G	A	G	0.15	0.0284	0.275941	0.28	FALSE	FALSE	FALSE	33JtIo	0.0256	0.2681	8400	outcome	TRUE	reported	textfile	ZNRD1	9.3e-05	0.0383812	exposure	TRUE	reported	fKkuDY	textfile	2	TRUE
rs55877375	A	G	A	G	0.38	0.0913	0.047722	0.06	FALSE	FALSE	FALSE	33JtIo	0.0539	0.09014	10327	outcome	TRUE	reported	textfile	POLR1B	1.7e-05	0.0883508	exposure	TRUE	reported	fKkuDY	textfile	2	TRUE
rs57492581	C	T	C	T	0.66	-0.0904	0.06374	0.05	FALSE	FALSE	FALSE	33JtIo	0.0497	0.06916	11432	outcome	TRUE	reported	textfile	POLR1B	1.9e-15	0.0830429	exposure	TRUE	reported	fKkuDY	textfile	2	TRUE
rs60375821	T	C	T	C	-0.28	0.0312	0.11554	0.1	FALSE	FALSE	FALSE	33JtIo	0.033	0.3436	11615	outcome	TRUE	reported	textfile	POLR1A	2.4e-08	0.0501758	exposure	TRUE	reported	fKkuDY	textfile	2	TRUE
rs62159879	T	C	T	C	0.67	0.0643	0.012322	0.02	FALSE	FALSE	FALSE	33JtIo	0.0689	0.3508	10613	outcome	TRUE	reported	textfile	POLR1B	7.7e-06	0.149776	exposure	TRUE	reported	fKkuDY	textfile	2	TRUE
rs72825696	A	G	A	G	0.42	0.065	0.032348	0.04	FALSE	FALSE	FALSE	33JtIo	0.0498	0.1921	11615	outcome	TRUE	reported	textfile	POLR1B	2.9e-05	0.10045	exposure	TRUE	reported	fKkuDY	textfile	2	TRUE
rs72943913	G	A	G	A	0.36	0.0169	0.041852	0.03	FALSE	FALSE	FALSE	33JtIo	0.0629	0.7879	10613	outcome	TRUE	reported	textfile	POLR1B	4.8e-05	0.0885574	exposure	TRUE	reported	fKkuDY	textfile	2	TRUE
rs7567380	A	G	A	G	0.12	0.0036	0.391278	0.58	FALSE	FALSE	FALSE	33JtIo	0.0194	0.851	11615	outcome	TRUE	reported	textfile	POLR1A	7e-05	0.0301789	exposure	TRUE	reported	fKkuDY	textfile	2	TRUE
Colon transverse-Longevity 99p
SNP	effect_allele.exposure	other_allele.exposure	effect_allele.outcome	other_allele.outcome	beta.exposure	beta.outcome	eaf.exposure	eaf.outcome	remove	palindromic	ambiguous	id.outcome	se.outcome	pval.outcome	samplesize.outcome	outcome	mr_keep.outcome	pval_origin.outcome	data_source.outcome	gene.exposure	pval.exposure	se.exposure	exposure	mr_keep.exposure	pval_origin.exposure	id.exposure	data_source.exposure	action	mr_keep
rs10202834	T	C	T	C	-0.22	-0.0314	0.450328	0.59	FALSE	FALSE	FALSE	asUVQi	0.0347	0.3654	4154	outcome	TRUE	reported	textfile	POLR1B	2.8e-08	0.0396146	exposure	TRUE	reported	fKkuDY	textfile	2	TRUE
rs1046282	G	A	G	A	-0.19	0.0307	0.293088	0.25	FALSE	FALSE	FALSE	asUVQi	0.0348	0.3768	4524	outcome	TRUE	reported	textfile	CD3EAP	5.9e-05	0.0473016	exposure	TRUE	reported	fKkuDY	textfile	2	TRUE
rs11127002	T	G	T	G	0.12	0.0143	0.449546	0.45	FALSE	FALSE	FALSE	asUVQi	0.0329	0.6639	4154	outcome	TRUE	reported	textfile	POLR1A	0.00011	0.0310286	exposure	TRUE	reported	fKkuDY	textfile	2	TRUE
rs114068877	A	G	A	G	-0.56	-0.0292	0.016845	0.02	FALSE	FALSE	FALSE	asUVQi	0.1208	0.809	3692	outcome	TRUE	reported	textfile	POLR1A	5.8e-09	0.0961799	exposure	TRUE	reported	fKkuDY	textfile	2	TRUE
rs114534559	T	C	T	C	-0.43	-0.1193	0.022145	0.03	FALSE	FALSE	FALSE	asUVQi	0.0992	0.2294	3915	outcome	TRUE	reported	textfile	POLR1A	6.6e-05	0.107762	exposure	TRUE	reported	fKkuDY	textfile	2	TRUE
rs114802991	A	G	A	G	0.34	0.3221	0.0128	0.04	FALSE	FALSE	FALSE	asUVQi	0.1358	0.01767	2273	outcome	TRUE	reported	textfile	ZNRD1	0.00011	0.0879143	exposure	TRUE	reported	fKkuDY	textfile	2	TRUE
rs115235811	T	C	T	C	-0.25	0.1183	0.062982	0.07	FALSE	FALSE	FALSE	asUVQi	0.0589	0.04479	4370	outcome	TRUE	reported	textfile	POLR1A	7.6e-05	0.0631844	exposure	TRUE	reported	fKkuDY	textfile	2	TRUE
rs11680446	C	G	C	G	-0.17	-0.0142	0.362327	0.27	FALSE	TRUE	FALSE	asUVQi	0.0374	0.7049	4154	outcome	TRUE	reported	textfile	POLR1B	4.6e-05	0.041717	exposure	TRUE	reported	fKkuDY	textfile	2	TRUE
rs144672004	G	C	G	C	0.85	0.1312	0.011377	0.02	FALSE	TRUE	FALSE	asUVQi	0.1879	0.4852	2829	outcome	TRUE	reported	textfile	POLR1B	1e-07	0.159573	exposure	TRUE	reported	fKkuDY	textfile	2	TRUE
rs145935842	G	A	G	A	0.83	0.0892	0.0086	0.01	FALSE	FALSE	FALSE	asUVQi	0.2088	0.6694	2409	outcome	TRUE	reported	textfile	POLR1B	1.4e-06	0.172021	exposure	TRUE	reported	fKkuDY	textfile	2	TRUE
rs2033770	T	C	T	C	0.15	0.0039	0.34718	0.72	FALSE	FALSE	FALSE	asUVQi	0.0335	0.9062	4524	outcome	TRUE	reported	textfile	POLR1A	5.6e-07	0.0299729	exposure	TRUE	reported	fKkuDY	textfile	2	TRUE
rs2982836	A	G	A	G	0.15	0.0984	0.275941	0.32	FALSE	FALSE	FALSE	asUVQi	0.0412	0.01699	2750	outcome	TRUE	reported	textfile	ZNRD1	9.3e-05	0.0383812	exposure	TRUE	reported	fKkuDY	textfile	2	TRUE
rs55877375	A	G	A	G	0.38	0.2339	0.047722	0.06	FALSE	FALSE	FALSE	asUVQi	0.0863	0.006706	3545	outcome	TRUE	reported	textfile	POLR1B	1.7e-05	0.0883508	exposure	TRUE	reported	fKkuDY	textfile	2	TRUE
rs57492581	C	T	C	T	0.66	-0.0305	0.06374	0.04	FALSE	FALSE	FALSE	asUVQi	0.0819	0.7095	4182	outcome	TRUE	reported	textfile	POLR1B	1.9e-15	0.0830429	exposure	TRUE	reported	fKkuDY	textfile	2	TRUE
rs60375821	T	C	T	C	-0.28	0.0673	0.11554	0.1	FALSE	FALSE	FALSE	asUVQi	0.0508	0.1854	4524	outcome	TRUE	reported	textfile	POLR1A	2.4e-08	0.0501758	exposure	TRUE	reported	fKkuDY	textfile	2	TRUE
rs62159879	T	C	T	C	0.67	-0.0066	0.012322	0.02	FALSE	FALSE	FALSE	asUVQi	0.1182	0.9554	3692	outcome	TRUE	reported	textfile	POLR1B	7.7e-06	0.149776	exposure	TRUE	reported	fKkuDY	textfile	2	TRUE
rs72825696	A	G	A	G	0.42	0.0028	0.032348	0.04	FALSE	FALSE	FALSE	asUVQi	0.082	0.9725	4050	outcome	TRUE	reported	textfile	POLR1B	2.9e-05	0.10045	exposure	TRUE	reported	fKkuDY	textfile	2	TRUE
rs72943913	G	A	G	A	0.36	0.0094	0.041852	0.03	FALSE	FALSE	FALSE	asUVQi	0.104	0.9277	3692	outcome	TRUE	reported	textfile	POLR1B	4.8e-05	0.0885574	exposure	TRUE	reported	fKkuDY	textfile	2	TRUE
rs7567380	A	G	A	G	0.12	0.0267	0.391278	0.58	FALSE	FALSE	FALSE	asUVQi	0.0304	0.3809	4524	outcome	TRUE	reported	textfile	POLR1A	7e-05	0.0301789	exposure	TRUE	reported	fKkuDY	textfile	2	TRUE
Liver-Longevity 90p
SNP	effect_allele.exposure	other_allele.exposure	effect_allele.outcome	other_allele.outcome	beta.exposure	beta.outcome	eaf.exposure	eaf.outcome	remove	palindromic	ambiguous	id.outcome	se.outcome	pval.outcome	samplesize.outcome	outcome	mr_keep.outcome	pval_origin.outcome	data_source.outcome	gene.exposure	pval.exposure	se.exposure	exposure	mr_keep.exposure	pval_origin.exposure	id.exposure	data_source.exposure	action	mr_keep
rs10758432	T	C	T	C	0.42	0.0382	0.16205	0.17	FALSE	FALSE	FALSE	zn9MGD	0.026	0.1428	11615	outcome	TRUE	reported	textfile	POLR1E	2.6e-05	0.0998588	exposure	TRUE	reported	8iRX8h	textfile	2	TRUE
rs111459259	A	C	A	C	0.52	0.0026	0.018013	0.03	FALSE	FALSE	FALSE	zn9MGD	0.0621	0.967	10613	outcome	TRUE	reported	textfile	POLR1B	2.7e-06	0.110817	exposure	TRUE	reported	8iRX8h	textfile	2	TRUE
rs12618629	A	G	A	G	-0.28	0.0477	0.47545	0.62	FALSE	FALSE	FALSE	zn9MGD	0.0199	0.01653	11615	outcome	TRUE	reported	textfile	POLR1B	1.4e-07	0.0531789	exposure	TRUE	reported	8iRX8h	textfile	2	TRUE
rs145935842	G	A	G	A	0.7	0.123	0.0086	0.01	FALSE	FALSE	FALSE	zn9MGD	0.1217	0.3122	6679	outcome	TRUE	reported	textfile	POLR1B	1.4e-05	0.161147	exposure	TRUE	reported	8iRX8h	textfile	2	TRUE
rs57492581	C	T	C	T	0.53	-0.0904	0.06374	0.05	FALSE	FALSE	FALSE	zn9MGD	0.0497	0.06916	11432	outcome	TRUE	reported	textfile	POLR1B	3.5e-08	0.0961122	exposure	TRUE	reported	8iRX8h	textfile	2	TRUE
Liver-Longevity 99p
SNP	effect_allele.exposure	other_allele.exposure	effect_allele.outcome	other_allele.outcome	beta.exposure	beta.outcome	eaf.exposure	eaf.outcome	remove	palindromic	ambiguous	id.outcome	se.outcome	pval.outcome	samplesize.outcome	outcome	mr_keep.outcome	pval_origin.outcome	data_source.outcome	gene.exposure	pval.exposure	se.exposure	exposure	mr_keep.exposure	pval_origin.exposure	id.exposure	data_source.exposure	action	mr_keep
rs10758432	T	C	T	C	0.42	0.0634	0.16205	0.16	FALSE	FALSE	FALSE	tNPdpB	0.0412	0.1242	4524	outcome	TRUE	reported	textfile	POLR1E	2.6e-05	0.0998588	exposure	TRUE	reported	8iRX8h	textfile	2	TRUE
rs111459259	A	C	A	C	0.52	-0.0082	0.018013	0.03	FALSE	FALSE	FALSE	tNPdpB	0.1032	0.9368	3692	outcome	TRUE	reported	textfile	POLR1B	2.7e-06	0.110817	exposure	TRUE	reported	8iRX8h	textfile	2	TRUE
rs12618629	A	G	A	G	-0.28	0.0283	0.47545	0.63	FALSE	FALSE	FALSE	tNPdpB	0.0311	0.3636	4524	outcome	TRUE	reported	textfile	POLR1B	1.4e-07	0.0531789	exposure	TRUE	reported	8iRX8h	textfile	2	TRUE
rs145935842	G	A	G	A	0.7	0.0892	0.0086	0.01	FALSE	FALSE	FALSE	tNPdpB	0.2088	0.6694	2409	outcome	TRUE	reported	textfile	POLR1B	1.4e-05	0.161147	exposure	TRUE	reported	8iRX8h	textfile	2	TRUE
rs57492581	C	T	C	T	0.53	-0.0305	0.06374	0.04	FALSE	FALSE	FALSE	tNPdpB	0.0819	0.7095	4182	outcome	TRUE	reported	textfile	POLR1B	3.5e-08	0.0961122	exposure	TRUE	reported	8iRX8h	textfile	2	TRUE
Adipose Visceral-Longevity 90p
SNP	effect_allele.exposure	other_allele.exposure	effect_allele.outcome	other_allele.outcome	beta.exposure	beta.outcome	eaf.exposure	eaf.outcome	remove	palindromic	ambiguous	id.outcome	se.outcome	pval.outcome	samplesize.outcome	outcome	mr_keep.outcome	pval_origin.outcome	data_source.outcome	gene.exposure	pval.exposure	se.exposure	exposure	mr_keep.exposure	pval_origin.exposure	id.exposure	data_source.exposure	action	mr_keep
rs10973336	C	A	C	A	0.3	-0.0086	0.043859	0.04	FALSE	FALSE	FALSE	cL7wJg	0.0495	0.8618	11615	outcome	TRUE	reported	textfile	POLR1E	6.1e-05	0.0748333	exposure	TRUE	reported	GJAhCU	textfile	2	TRUE
rs111459259	A	C	A	C	0.32	0.0026	0.018013	0.03	FALSE	FALSE	FALSE	cL7wJg	0.0621	0.967	10613	outcome	TRUE	reported	textfile	POLR1B	5.5e-06	0.0704109	exposure	TRUE	reported	GJAhCU	textfile	2	TRUE
rs114068877	A	G	A	G	-0.27	0.0523	0.016845	0.02	FALSE	FALSE	FALSE	cL7wJg	0.0756	0.4891	10305	outcome	TRUE	reported	textfile	POLR1A	0.00012	0.0702005	exposure	TRUE	reported	GJAhCU	textfile	2	TRUE
rs114802991	A	G	A	G	0.5	0.1822	0.0128	0.03	FALSE	FALSE	FALSE	cL7wJg	0.0933	0.05089	5891	outcome	TRUE	reported	textfile	ZNRD1	1.8e-09	0.0831269	exposure	TRUE	reported	GJAhCU	textfile	2	TRUE
rs11689338	G	A	G	A	-0.15	0.0412	0.353163	0.48	FALSE	FALSE	FALSE	cL7wJg	0.0195	0.03403	11615	outcome	TRUE	reported	textfile	POLR1B	3.9e-07	0.0295638	exposure	TRUE	reported	GJAhCU	textfile	2	TRUE
rs12685996	C	G	C	G	0.19	0.0333	0.132134	0.12	FALSE	TRUE	FALSE	cL7wJg	0.0307	0.2775	11615	outcome	TRUE	reported	textfile	POLR1E	9.1e-05	0.048551	exposure	TRUE	reported	GJAhCU	textfile	2	TRUE
rs13024436	A	G	A	G	0.097	0.0167	0.325589	0.41	FALSE	FALSE	FALSE	cL7wJg	0.0197	0.3971	11615	outcome	TRUE	reported	textfile	POLR1A	1.1e-05	0.0220629	exposure	TRUE	reported	GJAhCU	textfile	2	TRUE
rs144672004	G	C	G	C	0.55	0.0964	0.011377	0.02	FALSE	TRUE	FALSE	cL7wJg	0.1006	0.3377	9113	outcome	TRUE	reported	textfile	POLR1B	1.6e-05	0.127479	exposure	TRUE	reported	GJAhCU	textfile	2	TRUE
rs145935842	G	A	G	A	0.54	0.123	0.0086	0.01	FALSE	FALSE	FALSE	cL7wJg	0.1217	0.3122	6679	outcome	TRUE	reported	textfile	POLR1B	4.7e-07	0.107182	exposure	TRUE	reported	GJAhCU	textfile	2	TRUE
rs150662153	T	A	T	A	-0.22	0.0197	0.017376	0.03	FALSE	TRUE	FALSE	cL7wJg	0.0782	0.8012	11019	outcome	TRUE	reported	textfile	POLR1A	0.00011	0.0568857	exposure	TRUE	reported	GJAhCU	textfile	2	TRUE
rs150954178	G	C	G	C	-0.27	0.0531	0.0208	0.03	FALSE	TRUE	FALSE	cL7wJg	0.0634	0.4023	11019	outcome	TRUE	reported	textfile	POLR1A	8.5e-05	0.068705	exposure	TRUE	reported	GJAhCU	textfile	2	TRUE
rs1799793	T	C	T	C	-0.15	0.0069	0.267022	0.35	FALSE	FALSE	FALSE	cL7wJg	0.0215	0.7469	11050	outcome	TRUE	reported	textfile	CD3EAP	1.3e-05	0.0344028	exposure	TRUE	reported	GJAhCU	textfile	2	TRUE
rs2218035	C	T	C	T	0.086	-0.0123	0.397955	0.52	FALSE	FALSE	FALSE	cL7wJg	0.0192	0.5208	11615	outcome	TRUE	reported	textfile	POLR1A	8.4e-05	0.021868	exposure	TRUE	reported	GJAhCU	textfile	2	TRUE
rs55877375	A	G	A	G	0.33	0.0913	0.047722	0.06	FALSE	FALSE	FALSE	cL7wJg	0.0539	0.09014	10327	outcome	TRUE	reported	textfile	POLR1B	1.6e-06	0.068774	exposure	TRUE	reported	GJAhCU	textfile	2	TRUE
rs57492581	C	T	C	T	0.48	-0.0904	0.06374	0.05	FALSE	FALSE	FALSE	cL7wJg	0.0497	0.06916	11432	outcome	TRUE	reported	textfile	POLR1B	4e-15	0.0611081	exposure	TRUE	reported	GJAhCU	textfile	2	TRUE
rs60375821	T	C	T	C	-0.2	0.0312	0.11554	0.1	FALSE	FALSE	FALSE	cL7wJg	0.033	0.3436	11615	outcome	TRUE	reported	textfile	POLR1A	4.9e-08	0.0366643	exposure	TRUE	reported	GJAhCU	textfile	2	TRUE
rs60818406	C	T	C	T	0.19	0.0157	0.17721	0.19	FALSE	FALSE	FALSE	cL7wJg	0.0266	0.5547	11050	outcome	TRUE	reported	textfile	POLR1B	4.9e-07	0.0377719	exposure	TRUE	reported	GJAhCU	textfile	2	TRUE
rs62157381	A	G	A	G	0.24	0.0304	0.043093	0.06	FALSE	FALSE	FALSE	cL7wJg	0.042	0.4687	11615	outcome	TRUE	reported	textfile	POLR1B	0.0001	0.0616873	exposure	TRUE	reported	GJAhCU	textfile	2	TRUE
rs72591432	C	A	C	A	0.17	0.0656	0.131445	0.13	FALSE	FALSE	FALSE	cL7wJg	0.0289	0.02339	11615	outcome	TRUE	reported	textfile	TWISTNB	4.1e-06	0.0369064	exposure	TRUE	reported	GJAhCU	textfile	2	TRUE
rs7259762	T	C	T	C	-0.19	0.0534	0.229928	0.21	FALSE	FALSE	FALSE	cL7wJg	0.0257	0.03766	11050	outcome	TRUE	reported	textfile	CD3EAP	2.3e-06	0.0402108	exposure	TRUE	reported	GJAhCU	textfile	2	TRUE
rs73943920	T	C	T	C	-0.22	0.1031	0.053296	0.04	FALSE	FALSE	FALSE	cL7wJg	0.0485	0.03353	11615	outcome	TRUE	reported	textfile	POLR1A	3.2e-05	0.0529006	exposure	TRUE	reported	GJAhCU	textfile	2	TRUE
Adipose Visceral-Longevity 99p
SNP	effect_allele.exposure	other_allele.exposure	effect_allele.outcome	other_allele.outcome	beta.exposure	beta.outcome	eaf.exposure	eaf.outcome	remove	palindromic	ambiguous	id.outcome	se.outcome	pval.outcome	samplesize.outcome	outcome	mr_keep.outcome	pval_origin.outcome	data_source.outcome	gene.exposure	pval.exposure	se.exposure	exposure	mr_keep.exposure	pval_origin.exposure	id.exposure	data_source.exposure	action	mr_keep
rs10973336	C	A	C	A	0.3	-0.0711	0.043859	0.04	FALSE	FALSE	FALSE	w69Tlv	0.0814	0.3828	4182	outcome	TRUE	reported	textfile	POLR1E	6.1e-05	0.0748333	exposure	TRUE	reported	GJAhCU	textfile	2	TRUE
rs111459259	A	C	A	C	0.32	-0.0082	0.018013	0.03	FALSE	FALSE	FALSE	w69Tlv	0.1032	0.9368	3692	outcome	TRUE	reported	textfile	POLR1B	5.5e-06	0.0704109	exposure	TRUE	reported	GJAhCU	textfile	2	TRUE
rs114068877	A	G	A	G	-0.27	-0.0292	0.016845	0.02	FALSE	FALSE	FALSE	w69Tlv	0.1208	0.809	3692	outcome	TRUE	reported	textfile	POLR1A	0.00012	0.0702005	exposure	TRUE	reported	GJAhCU	textfile	2	TRUE
rs114802991	A	G	A	G	0.5	0.3221	0.0128	0.04	FALSE	FALSE	FALSE	w69Tlv	0.1358	0.01767	2273	outcome	TRUE	reported	textfile	ZNRD1	1.8e-09	0.0831269	exposure	TRUE	reported	GJAhCU	textfile	2	TRUE
rs11689338	G	A	G	A	-0.15	0.0345	0.353163	0.49	FALSE	FALSE	FALSE	w69Tlv	0.0303	0.255	4524	outcome	TRUE	reported	textfile	POLR1B	3.9e-07	0.0295638	exposure	TRUE	reported	GJAhCU	textfile	2	TRUE
rs12685996	C	G	C	G	0.19	0.0531	0.132134	0.11	FALSE	TRUE	FALSE	w69Tlv	0.0488	0.2767	4524	outcome	TRUE	reported	textfile	POLR1E	9.1e-05	0.048551	exposure	TRUE	reported	GJAhCU	textfile	2	TRUE
rs13024436	A	G	A	G	0.097	0.0032	0.325589	0.41	FALSE	FALSE	FALSE	w69Tlv	0.0308	0.9171	4524	outcome	TRUE	reported	textfile	POLR1A	1.1e-05	0.0220629	exposure	TRUE	reported	GJAhCU	textfile	2	TRUE
rs144672004	G	C	G	C	0.55	0.1312	0.011377	0.02	FALSE	TRUE	FALSE	w69Tlv	0.1879	0.4852	2829	outcome	TRUE	reported	textfile	POLR1B	1.6e-05	0.127479	exposure	TRUE	reported	GJAhCU	textfile	2	TRUE
rs145935842	G	A	G	A	0.54	0.0892	0.0086	0.01	FALSE	FALSE	FALSE	w69Tlv	0.2088	0.6694	2409	outcome	TRUE	reported	textfile	POLR1B	4.7e-07	0.107182	exposure	TRUE	reported	GJAhCU	textfile	2	TRUE
rs150662153	T	A	T	A	-0.22	0.1697	0.017376	0.03	FALSE	TRUE	FALSE	w69Tlv	0.1371	0.2158	3322	outcome	TRUE	reported	textfile	POLR1A	0.00011	0.0568857	exposure	TRUE	reported	GJAhCU	textfile	2	TRUE
rs150954178	G	C	G	C	-0.27	0.1087	0.0208	0.03	FALSE	TRUE	FALSE	w69Tlv	0.114	0.3403	3545	outcome	TRUE	reported	textfile	POLR1A	8.5e-05	0.068705	exposure	TRUE	reported	GJAhCU	textfile	2	TRUE
rs1799793	T	C	T	C	-0.15	-0.0152	0.267022	0.34	FALSE	FALSE	FALSE	w69Tlv	0.0349	0.6622	4154	outcome	TRUE	reported	textfile	CD3EAP	1.3e-05	0.0344028	exposure	TRUE	reported	GJAhCU	textfile	2	TRUE
rs2218035	C	T	C	T	0.086	0.0038	0.397955	0.52	FALSE	FALSE	FALSE	w69Tlv	0.0298	0.8994	4524	outcome	TRUE	reported	textfile	POLR1A	8.4e-05	0.021868	exposure	TRUE	reported	GJAhCU	textfile	2	TRUE
rs55877375	A	G	A	G	0.33	0.2339	0.047722	0.06	FALSE	FALSE	FALSE	w69Tlv	0.0863	0.006706	3545	outcome	TRUE	reported	textfile	POLR1B	1.6e-06	0.068774	exposure	TRUE	reported	GJAhCU	textfile	2	TRUE
rs57492581	C	T	C	T	0.48	-0.0305	0.06374	0.04	FALSE	FALSE	FALSE	w69Tlv	0.0819	0.7095	4182	outcome	TRUE	reported	textfile	POLR1B	4e-15	0.0611081	exposure	TRUE	reported	GJAhCU	textfile	2	TRUE
rs60375821	T	C	T	C	-0.2	0.0673	0.11554	0.1	FALSE	FALSE	FALSE	w69Tlv	0.0508	0.1854	4524	outcome	TRUE	reported	textfile	POLR1A	4.9e-08	0.0366643	exposure	TRUE	reported	GJAhCU	textfile	2	TRUE
rs60818406	C	T	C	T	0.19	-0.013	0.17721	0.19	FALSE	FALSE	FALSE	w69Tlv	0.0432	0.7641	4154	outcome	TRUE	reported	textfile	POLR1B	4.9e-07	0.0377719	exposure	TRUE	reported	GJAhCU	textfile	2	TRUE
rs62157381	A	G	A	G	0.24	-0.0123	0.043093	0.06	FALSE	FALSE	FALSE	w69Tlv	0.0676	0.8559	4303	outcome	TRUE	reported	textfile	POLR1B	0.0001	0.0616873	exposure	TRUE	reported	GJAhCU	textfile	2	TRUE
rs72591432	C	A	C	A	0.17	0.1209	0.131445	0.14	FALSE	FALSE	FALSE	w69Tlv	0.0451	0.00736	4524	outcome	TRUE	reported	textfile	TWISTNB	4.1e-06	0.0369064	exposure	TRUE	reported	GJAhCU	textfile	2	TRUE
rs7259762	T	C	T	C	-0.19	0.0795	0.229928	0.21	FALSE	FALSE	FALSE	w69Tlv	0.0421	0.05891	4154	outcome	TRUE	reported	textfile	CD3EAP	2.3e-06	0.0402108	exposure	TRUE	reported	GJAhCU	textfile	2	TRUE
rs73943920	T	C	T	C	-0.22	0.0666	0.053296	0.04	FALSE	FALSE	FALSE	w69Tlv	0.078	0.3933	4182	outcome	TRUE	reported	textfile	POLR1A	3.2e-05	0.0529006	exposure	TRUE	reported	GJAhCU	textfile	2	TRUE
Small intestine-Longevity 90p
SNP	effect_allele.exposure	other_allele.exposure	effect_allele.outcome	other_allele.outcome	beta.exposure	beta.outcome	eaf.exposure	eaf.outcome	remove	palindromic	ambiguous	id.outcome	se.outcome	pval.outcome	samplesize.outcome	outcome	mr_keep.outcome	pval_origin.outcome	data_source.outcome	gene.exposure	pval.exposure	se.exposure	exposure	mr_keep.exposure	pval_origin.exposure	id.exposure	data_source.exposure	action	mr_keep
rs112165031	A	G	A	G	0.61	0.047	0.0465	0.03	FALSE	FALSE	FALSE	NFFU6r	0.0569	0.4091	11019	outcome	TRUE	reported	textfile	POLR1B	2.2e-05	0.143747	exposure	TRUE	reported	pu8X8h	textfile	2	TRUE
rs144672004	G	C	G	C	0.99	0.0964	0.011377	0.02	FALSE	TRUE	FALSE	NFFU6r	0.1006	0.3377	9113	outcome	TRUE	reported	textfile	POLR1B	3.2e-05	0.238053	exposure	TRUE	reported	pu8X8h	textfile	2	TRUE
rs3961919	A	G	A	G	0.31	0.0008	0.433635	0.43	FALSE	FALSE	FALSE	NFFU6r	0.0194	0.9679	11615	outcome	TRUE	reported	textfile	POLR1B	1.3e-06	0.0640528	exposure	TRUE	reported	pu8X8h	textfile	2	TRUE
rs4848992	A	T	A	T	0.3	-0.0005	0.422524	0.4	FALSE	TRUE	TRUE	NFFU6r	0.0246	0.9823	11050	outcome	TRUE	reported	textfile	POLR1B	6.3e-07	0.0602194	exposure	TRUE	reported	pu8X8h	textfile	2	FALSE
rs62157383	A	G	A	G	0.63	0.0342	0.080831	0.06	FALSE	FALSE	FALSE	NFFU6r	0.0428	0.4235	11050	outcome	TRUE	reported	textfile	POLR1B	7.8e-06	0.140921	exposure	TRUE	reported	pu8X8h	textfile	2	TRUE
rs62158651	T	C	T	C	0.82	0.0127	0.017537	0.03	FALSE	FALSE	FALSE	NFFU6r	0.0581	0.8265	11019	outcome	TRUE	reported	textfile	POLR1B	2.4e-05	0.194129	exposure	TRUE	reported	pu8X8h	textfile	2	TRUE
rs6756835	G	A	G	A	-0.77	-0.0173	0.021999	0.93	FALSE	FALSE	FALSE	NFFU6r	0.0533	0.7456	10454	outcome	TRUE	reported	textfile	POLR1B	4.4e-05	0.188476	exposure	TRUE	reported	pu8X8h	textfile	2	TRUE
rs719667	T	C	T	C	-0.38	0.0472	0.446834	0.61	FALSE	FALSE	FALSE	NFFU6r	0.0197	0.01672	11615	outcome	TRUE	reported	textfile	POLR1B	1.1e-08	0.066497	exposure	TRUE	reported	pu8X8h	textfile	2	TRUE
rs78932428	T	C	T	C	-0.41	-0.079	0.047786	0.05	FALSE	FALSE	FALSE	NFFU6r	0.0477	0.09743	11615	outcome	TRUE	reported	textfile	POLR1A	2.9e-05	0.0980584	exposure	TRUE	reported	pu8X8h	textfile	2	TRUE
Small intestine-Longevity 99p
SNP	effect_allele.exposure	other_allele.exposure	effect_allele.outcome	other_allele.outcome	beta.exposure	beta.outcome	eaf.exposure	eaf.outcome	remove	palindromic	ambiguous	id.outcome	se.outcome	pval.outcome	samplesize.outcome	outcome	mr_keep.outcome	pval_origin.outcome	data_source.outcome	gene.exposure	pval.exposure	se.exposure	exposure	mr_keep.exposure	pval_origin.exposure	id.exposure	data_source.exposure	action	mr_keep
rs112165031	A	G	A	G	0.61	-0.0536	0.0465	0.03	FALSE	FALSE	FALSE	zWOF5M	0.0921	0.5608	3915	outcome	TRUE	reported	textfile	POLR1B	2.2e-05	0.143747	exposure	TRUE	reported	pu8X8h	textfile	2	TRUE
rs144672004	G	C	G	C	0.99	0.1312	0.011377	0.02	FALSE	TRUE	FALSE	zWOF5M	0.1879	0.4852	2829	outcome	TRUE	reported	textfile	POLR1B	3.2e-05	0.238053	exposure	TRUE	reported	pu8X8h	textfile	2	TRUE
rs3961919	A	G	A	G	0.31	-0.0403	0.433635	0.42	FALSE	FALSE	FALSE	zWOF5M	0.0305	0.1867	4524	outcome	TRUE	reported	textfile	POLR1B	1.3e-06	0.0640528	exposure	TRUE	reported	pu8X8h	textfile	2	TRUE
rs4848992	A	T	A	T	0.3	0.0139	0.422524	0.4	FALSE	TRUE	TRUE	zWOF5M	0.0398	0.7259	4154	outcome	TRUE	reported	textfile	POLR1B	6.3e-07	0.0602194	exposure	TRUE	reported	pu8X8h	textfile	2	FALSE
rs62157383	A	G	A	G	0.63	0.0041	0.080831	0.06	FALSE	FALSE	FALSE	zWOF5M	0.073	0.9548	3933	outcome	TRUE	reported	textfile	POLR1B	7.8e-06	0.140921	exposure	TRUE	reported	pu8X8h	textfile	2	TRUE
rs62158651	T	C	T	C	0.82	0.0864	0.017537	0.03	FALSE	FALSE	FALSE	zWOF5M	0.0937	0.3569	3915	outcome	TRUE	reported	textfile	POLR1B	2.4e-05	0.194129	exposure	TRUE	reported	pu8X8h	textfile	2	TRUE
rs6756835	G	A	G	A	-0.77	-0.062	0.021999	0.93	FALSE	FALSE	FALSE	zWOF5M	0.087	0.4755	3545	outcome	TRUE	reported	textfile	POLR1B	4.4e-05	0.188476	exposure	TRUE	reported	pu8X8h	textfile	2	TRUE
rs719667	T	C	T	C	-0.38	0.0303	0.446834	0.62	FALSE	FALSE	FALSE	zWOF5M	0.0308	0.3247	4524	outcome	TRUE	reported	textfile	POLR1B	1.1e-08	0.066497	exposure	TRUE	reported	pu8X8h	textfile	2	TRUE
rs78932428	T	C	T	C	-0.41	0.0094	0.047786	0.05	FALSE	FALSE	FALSE	zWOF5M	0.0794	0.9062	4050	outcome	TRUE	reported	textfile	POLR1A	2.9e-05	0.0980584	exposure	TRUE	reported	pu8X8h	textfile	2	TRUE
Pituitary-Longevity 90p
SNP	effect_allele.exposure	other_allele.exposure	effect_allele.outcome	other_allele.outcome	beta.exposure	beta.outcome	eaf.exposure	eaf.outcome	remove	palindromic	ambiguous	id.outcome	se.outcome	pval.outcome	samplesize.outcome	outcome	mr_keep.outcome	pval_origin.outcome	data_source.outcome	gene.exposure	pval.exposure	se.exposure	exposure	mr_keep.exposure	pval_origin.exposure	id.exposure	data_source.exposure	action	mr_keep
rs10201457	T	C	T	C	0.23	0.0129	0.422822	0.53	FALSE	FALSE	FALSE	q93a5Q	0.0196	0.5094	11050	outcome	TRUE	reported	textfile	POLR1A	9.1e-07	0.0468416	exposure	TRUE	reported	pNA6eL	textfile	2	TRUE
rs114068877	A	G	A	G	-0.86	0.0523	0.016845	0.02	FALSE	FALSE	FALSE	q93a5Q	0.0756	0.4891	10305	outcome	TRUE	reported	textfile	POLR1A	2.8e-08	0.154857	exposure	TRUE	reported	pNA6eL	textfile	2	TRUE
rs114534559	T	C	T	C	-0.87	-0.1495	0.022145	0.03	FALSE	FALSE	FALSE	q93a5Q	0.0632	0.01794	10613	outcome	TRUE	reported	textfile	POLR1A	2.4e-07	0.16843	exposure	TRUE	reported	pNA6eL	textfile	2	TRUE
rs11673653	T	C	T	C	0.31	-0.0409	0.456629	0.59	FALSE	FALSE	FALSE	q93a5Q	0.022	0.06257	11050	outcome	TRUE	reported	textfile	CD3EAP	1.1e-05	0.0705103	exposure	TRUE	reported	pNA6eL	textfile	2	TRUE
rs12975413	C	T	C	T	-0.29	0.0037	0.286797	0.34	FALSE	FALSE	FALSE	q93a5Q	0.0211	0.861	11050	outcome	TRUE	reported	textfile	CD3EAP	4.1e-05	0.0707012	exposure	TRUE	reported	pNA6eL	textfile	2	TRUE
rs142439341	T	C	T	C	-0.55	-0.0946	0.024976	0.04	FALSE	FALSE	FALSE	q93a5Q	0.0597	0.1128	10637	outcome	TRUE	reported	textfile	POLR1A	3.9e-05	0.133712	exposure	TRUE	reported	pNA6eL	textfile	2	TRUE
rs145290257	G	A	G	A	-0.46	-0.0439	0.030858	0.03	FALSE	FALSE	FALSE	q93a5Q	0.0572	0.4427	11432	outcome	TRUE	reported	textfile	POLR1A	1.9e-05	0.107569	exposure	TRUE	reported	pNA6eL	textfile	2	TRUE
rs146495888	A	G	A	G	0.75	0.0042	0.015435	0.02	FALSE	FALSE	FALSE	q93a5Q	0.0752	0.9552	9586	outcome	TRUE	reported	textfile	POLR1B	7.1e-05	0.188779	exposure	TRUE	reported	pNA6eL	textfile	2	TRUE
rs2033770	T	C	T	C	0.2	0.0012	0.34718	0.72	FALSE	FALSE	FALSE	q93a5Q	0.0214	0.9569	11615	outcome	TRUE	reported	textfile	POLR1A	5.4e-05	0.0495343	exposure	TRUE	reported	pNA6eL	textfile	2	TRUE
rs2072185	A	G	A	G	0.46	0.0303	0.264177	0.16	FALSE	FALSE	FALSE	q93a5Q	0.027	0.2622	11615	outcome	TRUE	reported	textfile	TWISTNB	1.1e-10	0.0712899	exposure	TRUE	reported	pNA6eL	textfile	2	TRUE
rs34179430	G	A	G	A	0.32	-0.0102	0.173216	0.2	FALSE	FALSE	FALSE	q93a5Q	0.0241	0.6722	11615	outcome	TRUE	reported	textfile	POLR1B	2.4e-05	0.0757575	exposure	TRUE	reported	pNA6eL	textfile	2	TRUE
rs395893	A	T	A	T	0.31	-0.0283	0.211844	0.26	FALSE	TRUE	FALSE	q93a5Q	0.0242	0.2434	11050	outcome	TRUE	reported	textfile	CD3EAP	4.9e-05	0.0763482	exposure	TRUE	reported	pNA6eL	textfile	2	TRUE
rs3980067	G	T	G	T	0.3	-0.0144	0.265783	0.23	FALSE	FALSE	FALSE	q93a5Q	0.0231	0.5331	11615	outcome	TRUE	reported	textfile	POLR1B	8e-05	0.0760572	exposure	TRUE	reported	pNA6eL	textfile	2	TRUE
rs55877375	A	G	A	G	0.59	0.0913	0.047722	0.06	FALSE	FALSE	FALSE	q93a5Q	0.0539	0.09014	10327	outcome	TRUE	reported	textfile	POLR1B	5.4e-05	0.146126	exposure	TRUE	reported	pNA6eL	textfile	2	TRUE
rs7562837	C	T	C	T	-0.38	0.0696	0.217401	0.08	FALSE	FALSE	FALSE	q93a5Q	0.0359	0.05275	11615	outcome	TRUE	reported	textfile	POLR1A	2.9e-06	0.0812352	exposure	TRUE	reported	pNA6eL	textfile	2	TRUE
rs77397999	T	C	T	C	-0.81	0.2085	0.011952	0.02	FALSE	FALSE	FALSE	q93a5Q	0.0999	0.03683	7773	outcome	TRUE	reported	textfile	POLR1A	1.8e-05	0.188884	exposure	TRUE	reported	pNA6eL	textfile	2	TRUE
Pituitary-Longevity 99p
SNP	effect_allele.exposure	other_allele.exposure	effect_allele.outcome	other_allele.outcome	beta.exposure	beta.outcome	eaf.exposure	eaf.outcome	remove	palindromic	ambiguous	id.outcome	se.outcome	pval.outcome	samplesize.outcome	outcome	mr_keep.outcome	pval_origin.outcome	data_source.outcome	gene.exposure	pval.exposure	se.exposure	exposure	mr_keep.exposure	pval_origin.exposure	id.exposure	data_source.exposure	action	mr_keep
rs10201457	T	C	T	C	0.23	0.0341	0.422822	0.53	FALSE	FALSE	FALSE	3vWy3y	0.0316	0.2803	4154	outcome	TRUE	reported	textfile	POLR1A	9.1e-07	0.0468416	exposure	TRUE	reported	pNA6eL	textfile	2	TRUE
rs114068877	A	G	A	G	-0.86	-0.0292	0.016845	0.02	FALSE	FALSE	FALSE	3vWy3y	0.1208	0.809	3692	outcome	TRUE	reported	textfile	POLR1A	2.8e-08	0.154857	exposure	TRUE	reported	pNA6eL	textfile	2	TRUE
rs114534559	T	C	T	C	-0.87	-0.1193	0.022145	0.03	FALSE	FALSE	FALSE	3vWy3y	0.0992	0.2294	3915	outcome	TRUE	reported	textfile	POLR1A	2.4e-07	0.16843	exposure	TRUE	reported	pNA6eL	textfile	2	TRUE
rs11673653	T	C	T	C	0.31	-0.0571	0.456629	0.59	FALSE	FALSE	FALSE	3vWy3y	0.0349	0.1023	4154	outcome	TRUE	reported	textfile	CD3EAP	1.1e-05	0.0705103	exposure	TRUE	reported	pNA6eL	textfile	2	TRUE
rs12975413	C	T	C	T	-0.29	-0.0273	0.286797	0.34	FALSE	FALSE	FALSE	3vWy3y	0.0341	0.4235	4154	outcome	TRUE	reported	textfile	CD3EAP	4.1e-05	0.0707012	exposure	TRUE	reported	pNA6eL	textfile	2	TRUE
rs142439341	T	C	T	C	-0.55	0.0267	0.024976	0.03	FALSE	FALSE	FALSE	3vWy3y	0.1059	0.8007	3545	outcome	TRUE	reported	textfile	POLR1A	3.9e-05	0.133712	exposure	TRUE	reported	pNA6eL	textfile	2	TRUE
rs145290257	G	A	G	A	-0.46	-0.1193	0.030858	0.03	FALSE	FALSE	FALSE	3vWy3y	0.0995	0.2302	3915	outcome	TRUE	reported	textfile	POLR1A	1.9e-05	0.107569	exposure	TRUE	reported	pNA6eL	textfile	2	TRUE
rs146495888	A	G	A	G	0.75	0.0209	0.015435	0.02	FALSE	FALSE	FALSE	3vWy3y	0.1235	0.8657	3322	outcome	TRUE	reported	textfile	POLR1B	7.1e-05	0.188779	exposure	TRUE	reported	pNA6eL	textfile	2	TRUE
rs181019792	T	G	T	G	0.92	-0.0332	0.017249	0.02	FALSE	FALSE	FALSE	3vWy3y	0.2197	0.8798	2297	outcome	TRUE	reported	textfile	POLR1B	4.2e-05	0.224599	exposure	TRUE	reported	pNA6eL	textfile	2	TRUE
rs2033770	T	C	T	C	0.2	0.0039	0.34718	0.72	FALSE	FALSE	FALSE	3vWy3y	0.0335	0.9062	4524	outcome	TRUE	reported	textfile	POLR1A	5.4e-05	0.0495343	exposure	TRUE	reported	pNA6eL	textfile	2	TRUE
rs2072185	A	G	A	G	0.46	0.0968	0.264177	0.16	FALSE	FALSE	FALSE	3vWy3y	0.0423	0.02196	4524	outcome	TRUE	reported	textfile	TWISTNB	1.1e-10	0.0712899	exposure	TRUE	reported	pNA6eL	textfile	2	TRUE
rs34179430	G	A	G	A	0.32	-0.0048	0.173216	0.2	FALSE	FALSE	FALSE	3vWy3y	0.038	0.8991	4524	outcome	TRUE	reported	textfile	POLR1B	2.4e-05	0.0757575	exposure	TRUE	reported	pNA6eL	textfile	2	TRUE
rs395893	A	T	A	T	0.31	0.0041	0.211844	0.27	FALSE	TRUE	FALSE	3vWy3y	0.0391	0.9171	4154	outcome	TRUE	reported	textfile	CD3EAP	4.9e-05	0.0763482	exposure	TRUE	reported	pNA6eL	textfile	2	TRUE
rs3980067	G	T	G	T	0.3	0.0282	0.265783	0.22	FALSE	FALSE	FALSE	3vWy3y	0.0364	0.4385	4524	outcome	TRUE	reported	textfile	POLR1B	8e-05	0.0760572	exposure	TRUE	reported	pNA6eL	textfile	2	TRUE
rs55877375	A	G	A	G	0.59	0.2339	0.047722	0.06	FALSE	FALSE	FALSE	3vWy3y	0.0863	0.006706	3545	outcome	TRUE	reported	textfile	POLR1B	5.4e-05	0.146126	exposure	TRUE	reported	pNA6eL	textfile	2	TRUE
rs7562837	C	T	C	T	-0.38	0.1138	0.217401	0.08	FALSE	FALSE	FALSE	3vWy3y	0.0579	0.04954	4370	outcome	TRUE	reported	textfile	POLR1A	2.9e-06	0.0812352	exposure	TRUE	reported	pNA6eL	textfile	2	TRUE
rs77397999	T	C	T	C	-0.81	0.0945	0.011952	0.02	FALSE	FALSE	FALSE	3vWy3y	0.1636	0.5635	2902	outcome	TRUE	reported	textfile	POLR1A	1.8e-05	0.188884	exposure	TRUE	reported	pNA6eL	textfile	2	TRUE

## Sheet: RP
Adipose Visceral-Longevity 90p
SNP	effect_allele.exposure	other_allele.exposure	effect_allele.outcome	other_allele.outcome	beta.exposure	beta.outcome	eaf.exposure	eaf.outcome	remove	palindromic	ambiguous	id.outcome	se.outcome	pval.outcome	samplesize.outcome	outcome	mr_keep.outcome	pval_origin.outcome	data_source.outcome	gene.exposure	pval.exposure	se.exposure	exposure	mr_keep.exposure	pval_origin.exposure	id.exposure	data_source.exposure	action	mr_keep
rs10009783	G	A	G	A	0.22	0.0093	0.207846	0.85	FALSE	FALSE	FALSE	Sh9SLp	0.0278	0.7368	11615	outcome	TRUE	reported	textfile	RPL9	4.4e-05	0.0538502	exposure	TRUE	reported	V7vv2w	textfile	2	TRUE
rs10415576	C	T	C	T	-0.088	-0.048	0.498882	0.39	FALSE	FALSE	FALSE	Sh9SLp	0.021	0.02249	11615	outcome	TRUE	reported	textfile	RPS11	1.2e-05	0.0201024	exposure	TRUE	reported	V7vv2w	textfile	2	TRUE
rs10422405	T	C	T	C	-0.4	-0.0648	0.066639	0.03	FALSE	FALSE	FALSE	Sh9SLp	0.085	0.4454	10249	outcome	TRUE	reported	textfile	RPL18A	4.8e-15	0.0510722	exposure	TRUE	reported	V7vv2w	textfile	2	TRUE
rs1057232	A	G	A	G	-0.36	0.0368	0.41518	0.55	FALSE	FALSE	FALSE	Sh9SLp	0.0198	0.0636	11075	outcome	TRUE	reported	textfile	RPS28	3.5e-48	0.0246829	exposure	TRUE	reported	V7vv2w	textfile	2	TRUE
rs10760461	T	C	T	C	-0.11	0.0262	0.476837	0.35	FALSE	FALSE	FALSE	Sh9SLp	0.02	0.1903	11615	outcome	TRUE	reported	textfile	RPL12	1.5e-05	0.0254119	exposure	TRUE	reported	V7vv2w	textfile	2	TRUE
rs10947541	A	G	A	G	0.24	-0.0007	0.024408	0.03	FALSE	FALSE	FALSE	Sh9SLp	0.0552	0.9905	11432	outcome	TRUE	reported	textfile	RPL10A	2.8e-05	0.0572908	exposure	TRUE	reported	V7vv2w	textfile	2	TRUE
rs111428791	C	T	C	T	-0.51	0.1312	0.018646	0.02	FALSE	FALSE	FALSE	Sh9SLp	0.1059	0.2153	8510	outcome	TRUE	reported	textfile	RPL36AL	7.1e-08	0.0946439	exposure	TRUE	reported	V7vv2w	textfile	2	TRUE
rs111501007	A	T	A	T	0.22	0.0721	0.042964	0.02	FALSE	TRUE	FALSE	Sh9SLp	0.1063	0.4974	7628	outcome	TRUE	reported	textfile	RPS13	3.4e-05	0.0530776	exposure	TRUE	reported	V7vv2w	textfile	2	TRUE
rs11171773	G	A	G	A	-0.59	0.024	0.226101	0.93	FALSE	FALSE	FALSE	Sh9SLp	0.0424	0.5705	11615	outcome	TRUE	reported	textfile	RPS26	4.1e-07	0.116503	exposure	TRUE	reported	V7vv2w	textfile	2	TRUE
rs11171821	A	G	A	G	-0.35	0.0447	0.140566	0.19	FALSE	FALSE	FALSE	Sh9SLp	0.0329	0.1746	8695	outcome	TRUE	reported	textfile	RPS26	7.3e-05	0.0882437	exposure	TRUE	reported	V7vv2w	textfile	2	TRUE
rs111921744	A	G	A	G	-0.19	-0.0247	0.035357	0.05	FALSE	FALSE	FALSE	Sh9SLp	0.0494	0.6169	11432	outcome	TRUE	reported	textfile	RPS8	3.7e-08	0.0345166	exposure	TRUE	reported	V7vv2w	textfile	2	TRUE
rs112098193	A	G	A	G	-0.19	0.0209	0.051956	0.04	FALSE	FALSE	FALSE	Sh9SLp	0.0784	0.7897	7695	outcome	TRUE	reported	textfile	RPLP2	6.4e-05	0.0475291	exposure	TRUE	reported	V7vv2w	textfile	2	TRUE
rs11211176	A	G	A	G	0.069	0.0015	0.492205	0.53	FALSE	FALSE	FALSE	Sh9SLp	0.02	0.9414	11050	outcome	TRUE	reported	textfile	RPS8	7.2e-06	0.0153754	exposure	TRUE	reported	V7vv2w	textfile	2	TRUE
rs11217125	C	T	C	T	-0.099	-0.0543	0.272884	0.25	FALSE	FALSE	FALSE	Sh9SLp	0.0224	0.01532	11615	outcome	TRUE	reported	textfile	RPS25	1.3e-06	0.0204556	exposure	TRUE	reported	V7vv2w	textfile	2	TRUE
rs11259961	C	G	C	G	-0.15	-0.0601	0.034443	0.04	FALSE	TRUE	FALSE	Sh9SLp	0.0516	0.2438	11615	outcome	TRUE	reported	textfile	RPS17	8.4e-05	0.0381418	exposure	TRUE	reported	V7vv2w	textfile	2	TRUE
rs1129460	C	A	C	A	-0.15	-0.0014	0.098977	0.26	FALSE	FALSE	FALSE	Sh9SLp	0.0385	0.9707	7492	outcome	TRUE	reported	textfile	RPS11	3.9e-06	0.0324912	exposure	TRUE	reported	V7vv2w	textfile	2	TRUE
rs1131017	G	C	G	C	-1.2	0.0149	0.444089	0.42	FALSE	TRUE	TRUE	Sh9SLp	0.0195	0.4468	11615	outcome	TRUE	reported	textfile	RPS26	1e-200	0.0394366	exposure	TRUE	reported	V7vv2w	textfile	2	FALSE
rs113217276	T	C	T	C	-0.2	-0.0921	0.056504	0.06	FALSE	FALSE	FALSE	Sh9SLp	0.0663	0.1646	7639	outcome	TRUE	reported	textfile	RPL8	2.7e-06	0.042622	exposure	TRUE	reported	V7vv2w	textfile	2	TRUE
rs113225496	C	T	C	T	0.24	-0.0348	0.089457	0.08	FALSE	FALSE	FALSE	Sh9SLp	0.0415	0.4019	10510	outcome	TRUE	reported	textfile	RPS28	3.2e-07	0.0469551	exposure	TRUE	reported	V7vv2w	textfile	2	TRUE
rs113423134	T	C	T	C	0.27	-0.0288	0.143466	0.17	FALSE	FALSE	FALSE	Sh9SLp	0.0261	0.2697	11615	outcome	TRUE	reported	textfile	RPL9	3.3e-06	0.0580495	exposure	TRUE	reported	V7vv2w	textfile	2	TRUE
rs113636971	G	A	G	A	-0.13	0.1086	0.076913	0.08	FALSE	FALSE	FALSE	Sh9SLp	0.0487	0.02571	11050	outcome	TRUE	reported	textfile	RPS3	0.00011	0.0336143	exposure	TRUE	reported	V7vv2w	textfile	2	TRUE
rs113816188	G	A	G	A	0.31	-0.0035	0.031545	0.03	FALSE	FALSE	FALSE	Sh9SLp	0.0904	0.9692	8336	outcome	TRUE	reported	textfile	RPSA	4.6e-07	0.06148	exposure	TRUE	reported	V7vv2w	textfile	2	TRUE
rs11553984	T	C	T	C	-0.52	-0.0374	0.025239	0.03	FALSE	FALSE	FALSE	Sh9SLp	0.0681	0.5825	10146	outcome	TRUE	reported	textfile	RPL10A	1.4e-15	0.0651184	exposure	TRUE	reported	V7vv2w	textfile	2	TRUE
rs116547500	C	G	C	G	-0.54	-0.0102	0.01699	0.03	FALSE	TRUE	FALSE	Sh9SLp	0.0645	0.8739	11209	outcome	TRUE	reported	textfile	RPSA	2.7e-16	0.0659661	exposure	TRUE	reported	V7vv2w	textfile	2	TRUE
rs116559528	G	T	G	T	-0.28	0.0736	0.058801	0.07	FALSE	FALSE	FALSE	Sh9SLp	0.0432	0.08853	11615	outcome	TRUE	reported	textfile	RPSA	4.3e-09	0.0476821	exposure	TRUE	reported	V7vv2w	textfile	2	TRUE
rs116585983	A	G	A	G	0.61	0.0257	0.0145	0.02	FALSE	FALSE	FALSE	Sh9SLp	0.0787	0.7438	10048	outcome	TRUE	reported	textfile	RPL9	7.3e-06	0.136017	exposure	TRUE	reported	V7vv2w	textfile	2	TRUE
rs11669305	T	C	T	C	0.11	-0.029	0.153121	0.19	FALSE	FALSE	FALSE	Sh9SLp	0.0295	0.3253	11050	outcome	TRUE	reported	textfile	RPS5	1.1e-06	0.0225741	exposure	TRUE	reported	V7vv2w	textfile	2	TRUE
rs11669559	G	C	G	C	-0.17	0.0581	0.141111	0.13	FALSE	TRUE	FALSE	Sh9SLp	0.0312	0.06286	11075	outcome	TRUE	reported	textfile	RPS28	2.6e-05	0.040419	exposure	TRUE	reported	V7vv2w	textfile	2	TRUE
rs11673607	G	C	G	C	0.21	0.0657	0.8596	0.77	FALSE	TRUE	FALSE	Sh9SLp	0.035	0.0606	8130	outcome	TRUE	reported	textfile	RPS9	3e-12	0.0300958	exposure	TRUE	reported	V7vv2w	textfile	2	TRUE
rs11678235	A	G	A	G	0.12	-0.0075	0.09594	0.12	FALSE	FALSE	FALSE	Sh9SLp	0.0324	0.8179	11075	outcome	TRUE	reported	textfile	RPS7	3.6e-05	0.0290433	exposure	TRUE	reported	V7vv2w	textfile	2	TRUE
rs116878368	T	A	T	A	0.25	0.0125	0.032002	0.05	FALSE	TRUE	FALSE	Sh9SLp	0.0692	0.8568	8867	outcome	TRUE	reported	textfile	RPS9	2.2e-05	0.0589128	exposure	TRUE	reported	V7vv2w	textfile	2	TRUE
rs117107008	C	T	C	T	-0.38	-0.0707	0.005391	0.02	FALSE	FALSE	FALSE	Sh9SLp	0.1286	0.5824	6016	outcome	TRUE	reported	textfile	RPS24	3.8e-05	0.0922483	exposure	TRUE	reported	V7vv2w	textfile	2	TRUE
rs11715522	C	A	C	A	0.18	0.002	0.359131	0.39	FALSE	FALSE	FALSE	Sh9SLp	0.0205	0.9209	11050	outcome	TRUE	reported	textfile	RPSA	2.7e-11	0.0270186	exposure	TRUE	reported	V7vv2w	textfile	2	TRUE
rs117396149	A	G	A	G	0.94	-0.033	0.026158	0.03	FALSE	FALSE	FALSE	Sh9SLp	0.089	0.7109	7385	outcome	TRUE	reported	textfile	RPS26	2.7e-09	0.158013	exposure	TRUE	reported	V7vv2w	textfile	2	TRUE
rs117427783	C	T	C	T	0.68	0.0637	0.042196	0.05	FALSE	FALSE	FALSE	Sh9SLp	0.0578	0.2703	10202	outcome	TRUE	reported	textfile	RPS26	1.1e-05	0.154668	exposure	TRUE	reported	V7vv2w	textfile	2	TRUE
rs117608214	A	G	A	G	-0.17	-0.139	0.018235	0.04	FALSE	FALSE	FALSE	Sh9SLp	0.0816	0.08843	8702	outcome	TRUE	reported	textfile	RPL19	0.0001	0.0436952	exposure	TRUE	reported	V7vv2w	textfile	2	TRUE
rs117872319	C	A	C	A	-0.17	0.1241	0.03249	0.04	FALSE	FALSE	FALSE	Sh9SLp	0.0494	0.01197	11615	outcome	TRUE	reported	textfile	RPS17	6.5e-05	0.0425651	exposure	TRUE	reported	V7vv2w	textfile	2	TRUE
rs118151919	T	A	T	A	-0.13	-0.0059	0.07787	0.09	FALSE	TRUE	FALSE	Sh9SLp	0.0344	0.8631	11615	outcome	TRUE	reported	textfile	RPS27A	1.2e-05	0.0296967	exposure	TRUE	reported	V7vv2w	textfile	2	TRUE
rs11860237	G	A	G	A	0.092	-0.0067	0.308506	0.8	FALSE	FALSE	FALSE	Sh9SLp	0.0242	0.7827	11615	outcome	TRUE	reported	textfile	RPL13	8e-05	0.0233242	exposure	TRUE	reported	V7vv2w	textfile	2	TRUE
rs11955828	C	A	C	A	-0.11	-0.0131	0.403319	0.68	FALSE	FALSE	FALSE	Sh9SLp	0.0211	0.5366	11050	outcome	TRUE	reported	textfile	RPS23	5.9e-05	0.0273852	exposure	TRUE	reported	V7vv2w	textfile	2	TRUE
rs12323544	C	T	C	T	0.17	0.0258	0.446052	0.37	FALSE	FALSE	FALSE	Sh9SLp	0.0199	0.1957	11615	outcome	TRUE	reported	textfile	RPL36AL	2.8e-07	0.0330969	exposure	TRUE	reported	V7vv2w	textfile	2	TRUE
rs12351518	C	G	C	G	-0.16	-0.0209	0.205355	0.11	FALSE	TRUE	FALSE	Sh9SLp	0.0311	0.5006	11615	outcome	TRUE	reported	textfile	RPS6	4.5e-09	0.027282	exposure	TRUE	reported	V7vv2w	textfile	2	TRUE
rs12542335	T	C	T	C	0.2	-0.0334	0.078377	0.1	FALSE	FALSE	FALSE	Sh9SLp	0.0372	0.3695	11050	outcome	TRUE	reported	textfile	RPL8	4.1e-07	0.0394925	exposure	TRUE	reported	V7vv2w	textfile	2	TRUE
rs12618238	C	G	C	G	-0.088	0.0061	0.293478	0.3	FALSE	TRUE	FALSE	Sh9SLp	0.0222	0.7848	11050	outcome	TRUE	reported	textfile	RPS7	3.6e-05	0.0212984	exposure	TRUE	reported	V7vv2w	textfile	2	TRUE
rs12831884	G	T	G	T	0.61	0.0652	0.044103	0.06	FALSE	FALSE	FALSE	Sh9SLp	0.0394	0.09778	11615	outcome	TRUE	reported	textfile	RPS26	2.7e-05	0.145328	exposure	TRUE	reported	V7vv2w	textfile	2	TRUE
rs13089215	C	T	C	T	-0.11	0.0164	0.456131	0.68	FALSE	FALSE	FALSE	Sh9SLp	0.0214	0.4438	11615	outcome	TRUE	reported	textfile	RPL14	8.2e-08	0.0205122	exposure	TRUE	reported	V7vv2w	textfile	2	TRUE
rs13112045	T	C	T	C	-0.35	-0.0209	0.12394	0.15	FALSE	FALSE	FALSE	Sh9SLp	0.0273	0.4435	11615	outcome	TRUE	reported	textfile	RPL9	2.5e-10	0.0553186	exposure	TRUE	reported	V7vv2w	textfile	2	TRUE
rs13150827	G	A	G	A	-0.23	0.0449	0.41151	0.35	FALSE	FALSE	FALSE	Sh9SLp	0.02	0.02465	11615	outcome	TRUE	reported	textfile	RPL9	3.9e-08	0.0418538	exposure	TRUE	reported	V7vv2w	textfile	2	TRUE
rs13170880	T	A	T	A	0.27	0.054	0.037942	0.05	FALSE	TRUE	FALSE	Sh9SLp	0.053	0.3085	10867	outcome	TRUE	reported	textfile	RPS23	1.9e-05	0.0631383	exposure	TRUE	reported	V7vv2w	textfile	2	TRUE
rs13176457	A	C	A	C	0.16	0.0118	0.216853	0.19	FALSE	FALSE	FALSE	Sh9SLp	0.0249	0.6367	11615	outcome	TRUE	reported	textfile	RPS23	5.6e-07	0.0319711	exposure	TRUE	reported	V7vv2w	textfile	2	TRUE
rs137682	C	A	C	A	0.078	-0.0073	0.308266	0.76	FALSE	FALSE	FALSE	Sh9SLp	0.0226	0.7476	11615	outcome	TRUE	reported	textfile	RPL3	8.4e-05	0.0198337	exposure	TRUE	reported	V7vv2w	textfile	2	TRUE
rs142027015	G	C	G	C	-0.3	-0.1146	0.018	0.03	FALSE	TRUE	FALSE	Sh9SLp	0.0951	0.2283	9144	outcome	TRUE	reported	textfile	RPL10A	0.00016	0.0794699	exposure	TRUE	reported	V7vv2w	textfile	2	TRUE
rs144131441	C	G	C	G	-0.79	-0.0377	0.049579	0.07	FALSE	TRUE	FALSE	Sh9SLp	0.0421	0.3702	11615	outcome	TRUE	reported	textfile	RPS26	8.5e-12	0.115669	exposure	TRUE	reported	V7vv2w	textfile	2	TRUE
rs144134171	A	G	A	G	0.88	-0.0883	0.018036	0.03	FALSE	FALSE	FALSE	Sh9SLp	0.0872	0.3116	9019	outcome	TRUE	reported	textfile	RPL3L	4.1e-06	0.0693551	exposure	TRUE	reported	V7vv2w	textfile	2	TRUE
rs145044106	C	G	C	G	-0.48	0.1198	0.008986	0.02	FALSE	TRUE	FALSE	Sh9SLp	0.083	0.1487	10305	outcome	TRUE	reported	textfile	RPS18	7e-07	0.0967476	exposure	TRUE	reported	V7vv2w	textfile	2	TRUE
rs145323240	T	C	T	C	0.57	-0.0258	0.032991	0.05	FALSE	FALSE	FALSE	Sh9SLp	0.0494	0.6014	11050	outcome	TRUE	reported	textfile	RPL9	3.8e-08	0.103638	exposure	TRUE	reported	V7vv2w	textfile	2	TRUE
rs1464047	T	C	T	C	-0.15	0.0265	0.39018	0.5	FALSE	FALSE	FALSE	Sh9SLp	0.0192	0.1681	11615	outcome	TRUE	reported	textfile	RPSA	5.1e-08	0.0275341	exposure	TRUE	reported	V7vv2w	textfile	2	TRUE
rs147068300	A	G	A	G	0.17	-0.0466	0.028467	0.04	FALSE	FALSE	FALSE	Sh9SLp	0.0502	0.3535	11615	outcome	TRUE	reported	textfile	RPS17	1.2e-05	0.0388342	exposure	TRUE	reported	V7vv2w	textfile	2	TRUE
rs148412578	A	G	A	G	0.4	0.0715	0.013202	0.03	FALSE	FALSE	FALSE	Sh9SLp	0.0825	0.3859	10048	outcome	TRUE	reported	textfile	RPL12	2.6e-07	0.0776646	exposure	TRUE	reported	V7vv2w	textfile	2	TRUE
rs150636280	A	C	A	C	0.49	-0.0874	0.011146	0.02	FALSE	FALSE	FALSE	Sh9SLp	0.0907	0.3353	8738	outcome	TRUE	reported	textfile	RPL26L1	1.6e-05	0.113572	exposure	TRUE	reported	V7vv2w	textfile	2	TRUE
rs150823486	A	G	A	G	-0.57	0.0219	0.045469	0.06	FALSE	FALSE	FALSE	Sh9SLp	0.0593	0.7121	10510	outcome	TRUE	reported	textfile	RPS26	1.7e-05	0.132526	exposure	TRUE	reported	V7vv2w	textfile	2	TRUE
rs151080330	T	C	T	C	0.25	0.0533	0.013076	0.03	FALSE	FALSE	FALSE	Sh9SLp	0.0626	0.3945	10104	outcome	TRUE	reported	textfile	RPL36	4e-05	0.0608646	exposure	TRUE	reported	V7vv2w	textfile	2	TRUE
rs1560663	A	G	A	G	-0.082	0.0333	0.409347	0.43	FALSE	FALSE	FALSE	Sh9SLp	0.0239	0.1644	11050	outcome	TRUE	reported	textfile	RPS14	2.2e-05	0.0193234	exposure	TRUE	reported	V7vv2w	textfile	2	TRUE
rs16832210	G	A	G	A	-0.22	-0.012	0.10612	0.13	FALSE	FALSE	FALSE	Sh9SLp	0.0305	0.6928	11050	outcome	TRUE	reported	textfile	RPS8	5.8e-23	0.022297	exposure	TRUE	reported	V7vv2w	textfile	2	TRUE
rs16933823	A	G	A	G	0.14	-0.0148	0.1933	0.21	FALSE	FALSE	FALSE	Sh9SLp	0.0243	0.5422	11615	outcome	TRUE	reported	textfile	RPS13	2.2e-09	0.0234023	exposure	TRUE	reported	V7vv2w	textfile	2	TRUE
rs16933829	C	T	C	T	0.6	0.0055	0.057219	0.03	FALSE	FALSE	FALSE	Sh9SLp	0.0746	0.9414	10151	outcome	TRUE	reported	textfile	RPS13	4.3e-42	0.0441346	exposure	TRUE	reported	V7vv2w	textfile	2	TRUE
rs17345965	A	G	A	G	0.33	0.0542	0.018953	0.02	FALSE	FALSE	FALSE	Sh9SLp	0.0923	0.5572	9606	outcome	TRUE	reported	textfile	RPS20	9.9e-06	0.0746717	exposure	TRUE	reported	V7vv2w	textfile	2	TRUE
rs17555056	G	C	G	C	-0.29	-0.0189	0.204714	0.11	FALSE	TRUE	FALSE	Sh9SLp	0.0317	0.5505	11615	outcome	TRUE	reported	textfile	RPS11	7.5e-25	0.0281718	exposure	TRUE	reported	V7vv2w	textfile	2	TRUE
rs17700376	G	A	G	A	-0.21	0.0032	0.296294	0.36	FALSE	FALSE	FALSE	Sh9SLp	0.0205	0.8775	11075	outcome	TRUE	reported	textfile	RPL28	1.9e-28	0.0189825	exposure	TRUE	reported	V7vv2w	textfile	2	TRUE
rs17841903	T	G	T	G	-0.12	0.0105	0.29541	0.26	FALSE	FALSE	FALSE	Sh9SLp	0.0375	0.779	7489	outcome	TRUE	reported	textfile	RPS9	1.9e-05	0.0280615	exposure	TRUE	reported	V7vv2w	textfile	2	TRUE
rs1860236	C	A	C	A	-0.11	-0.0528	0.244209	0.15	FALSE	FALSE	FALSE	Sh9SLp	0.0308	0.0867	10510	outcome	TRUE	reported	textfile	RPS2	8.2e-07	0.0223099	exposure	TRUE	reported	V7vv2w	textfile	2	TRUE
rs186655261	T	C	T	C	0.53	-0.0053	0.04808	0.03	FALSE	FALSE	FALSE	Sh9SLp	0.0833	0.9497	9606	outcome	TRUE	reported	textfile	RPL9	3.1e-07	0.103571	exposure	TRUE	reported	V7vv2w	textfile	2	TRUE
rs192132096	T	C	T	C	-0.28	-0.0579	0.010311	0.02	FALSE	FALSE	FALSE	Sh9SLp	0.1081	0.5922	9113	outcome	TRUE	reported	textfile	RPL12	6.1e-05	0.0698445	exposure	TRUE	reported	V7vv2w	textfile	2	TRUE
rs1948879	G	A	G	A	0.1	-0.0043	0.336364	0.74	FALSE	FALSE	FALSE	Sh9SLp	0.0226	0.848	11615	outcome	TRUE	reported	textfile	RPL29	8.9e-08	0.0186991	exposure	TRUE	reported	V7vv2w	textfile	2	TRUE
rs1949737	G	A	G	A	0.088	0.0072	0.49831	0.58	FALSE	FALSE	FALSE	Sh9SLp	0.0197	0.7124	11615	outcome	TRUE	reported	textfile	RPS24	5.2e-05	0.0217475	exposure	TRUE	reported	V7vv2w	textfile	2	TRUE
rs1957977	G	A	G	A	0.55	0.03	0.307056	0.77	FALSE	FALSE	FALSE	Sh9SLp	0.0228	0.189	11615	outcome	TRUE	reported	textfile	RPL36AL	2.2e-83	0.0284296	exposure	TRUE	reported	V7vv2w	textfile	2	TRUE
rs1963311	T	C	T	C	0.17	-0.0031	0.131303	0.14	FALSE	FALSE	FALSE	Sh9SLp	0.0289	0.9148	11615	outcome	TRUE	reported	textfile	RPS23	1e-05	0.0384861	exposure	TRUE	reported	V7vv2w	textfile	2	TRUE
rs2069414	A	C	A	C	-0.55	-0.0528	0.041972	0.06	FALSE	FALSE	FALSE	Sh9SLp	0.0424	0.213	10892	outcome	TRUE	reported	textfile	RPS26	5.3e-05	0.136072	exposure	TRUE	reported	V7vv2w	textfile	2	TRUE
rs2076172	T	C	T	C	-0.23	0.0009	0.439082	0.55	FALSE	FALSE	FALSE	Sh9SLp	0.0197	0.9623	11615	outcome	TRUE	reported	textfile	RPL10A	1.6e-34	0.0187695	exposure	TRUE	reported	V7vv2w	textfile	2	TRUE
rs210157	T	C	T	C	-0.13	0.0053	0.391636	0.36	FALSE	FALSE	FALSE	Sh9SLp	0.0199	0.7918	11615	outcome	TRUE	reported	textfile	RPS18	1.8e-06	0.027227	exposure	TRUE	reported	V7vv2w	textfile	2	TRUE
rs2214285	T	C	T	C	0.14	-0.001	0.161458	0.07	FALSE	FALSE	FALSE	Sh9SLp	0.0387	0.9785	11615	outcome	TRUE	reported	textfile	RPS13	9.1e-05	0.0357744	exposure	TRUE	reported	V7vv2w	textfile	2	TRUE
rs2247322	A	T	A	T	0.33	0.0093	0.378386	0.41	FALSE	TRUE	FALSE	Sh9SLp	0.0195	0.6318	11615	outcome	TRUE	reported	textfile	RPL12	2.8e-69	0.0187577	exposure	TRUE	reported	V7vv2w	textfile	2	TRUE
rs2257055	C	A	C	A	0.1	-0.0105	0.388318	0.5	FALSE	FALSE	FALSE	Sh9SLp	0.0199	0.5969	11615	outcome	TRUE	reported	textfile	RPL12	6.7e-06	0.0222074	exposure	TRUE	reported	V7vv2w	textfile	2	TRUE
rs2286049	G	T	G	T	0.11	-0.0004	0.335663	0.17	FALSE	FALSE	FALSE	Sh9SLp	0.0266	0.989	11615	outcome	TRUE	reported	textfile	RPLP0	6.6e-06	0.0244108	exposure	TRUE	reported	V7vv2w	textfile	2	TRUE
rs2286466	G	A	G	A	-0.14	-0.015	0.126148	0.81	FALSE	FALSE	FALSE	Sh9SLp	0.0293	0.6085	8583	outcome	TRUE	reported	textfile	RPS2	4.3e-11	0.0212335	exposure	TRUE	reported	V7vv2w	textfile	2	TRUE
rs2305119	T	C	T	C	0.078	0.0517	0.328121	0.22	FALSE	FALSE	FALSE	Sh9SLp	0.0235	0.02769	11615	outcome	TRUE	reported	textfile	RPS5	0.00016	0.0206622	exposure	TRUE	reported	V7vv2w	textfile	2	TRUE
rs2608822	T	C	T	C	-0.55	0.0597	0.096846	0.94	FALSE	FALSE	FALSE	Sh9SLp	0.0414	0.1494	11615	outcome	TRUE	reported	textfile	RPL9	3.6e-12	0.0791133	exposure	TRUE	reported	V7vv2w	textfile	2	TRUE
rs2608841	G	A	G	A	-0.32	-0.0068	0.136599	0.18	FALSE	FALSE	FALSE	Sh9SLp	0.0253	0.79	11615	outcome	TRUE	reported	textfile	RPL9	6e-08	0.0590536	exposure	TRUE	reported	V7vv2w	textfile	2	TRUE
rs2669850	C	G	C	G	-0.11	0.0034	0.452737	0.45	FALSE	TRUE	TRUE	Sh9SLp	0.0202	0.8682	11050	outcome	TRUE	reported	textfile	RPSA	1.2e-05	0.025128	exposure	TRUE	reported	V7vv2w	textfile	2	FALSE
rs2687967	A	G	A	G	-0.8	0.0276	0.351855	0.7	FALSE	FALSE	FALSE	Sh9SLp	0.0208	0.1841	11615	outcome	TRUE	reported	textfile	RPL9	1.1e-153	0.0302935	exposure	TRUE	reported	V7vv2w	textfile	2	TRUE
rs2748244	T	A	T	A	-0.16	0.0027	0.457577	0.3	FALSE	TRUE	TRUE	Sh9SLp	0.0215	0.9012	11050	outcome	TRUE	reported	textfile	RPS14	9.4e-14	0.0214792	exposure	TRUE	reported	V7vv2w	textfile	2	FALSE
rs2770995	G	C	G	C	-0.14	0.0234	0.151982	0.04	FALSE	TRUE	FALSE	Sh9SLp	0.0549	0.6704	11050	outcome	TRUE	reported	textfile	RACK1	6.5e-05	0.0350536	exposure	TRUE	reported	V7vv2w	textfile	2	TRUE
rs2776479	G	A	G	A	-0.15	-0.0238	0.384192	0.38	FALSE	FALSE	FALSE	Sh9SLp	0.0205	0.2474	11615	outcome	TRUE	reported	textfile	RPL36AL	2.5e-06	0.0318598	exposure	TRUE	reported	V7vv2w	textfile	2	TRUE
rs2818827	G	A	G	A	0.19	-0.024	0.483285	0.6	FALSE	FALSE	FALSE	Sh9SLp	0.02	0.2294	11615	outcome	TRUE	reported	textfile	RPS24	9.7e-22	0.0198329	exposure	TRUE	reported	V7vv2w	textfile	2	TRUE
rs28451415	G	A	G	A	-0.24	-0.0144	0.301689	0.59	FALSE	FALSE	FALSE	Sh9SLp	0.0199	0.4675	11615	outcome	TRUE	reported	textfile	UBA52	5.7e-35	0.0194531	exposure	TRUE	reported	V7vv2w	textfile	2	TRUE
rs28593016	T	C	T	C	-0.27	0.0577	0.172125	0.04	FALSE	FALSE	FALSE	Sh9SLp	0.0501	0.2493	11432	outcome	TRUE	reported	textfile	RPS3A	4.7e-11	0.0410326	exposure	TRUE	reported	V7vv2w	textfile	2	TRUE
rs28710291	A	G	A	G	0.1	0.0081	0.324969	0.63	FALSE	FALSE	FALSE	Sh9SLp	0.0209	0.6972	11615	outcome	TRUE	reported	textfile	RPLP2	5.6e-11	0.0152578	exposure	TRUE	reported	V7vv2w	textfile	2	TRUE
rs2879532	G	A	G	A	-0.13	-0.0139	0.453924	0.49	FALSE	FALSE	FALSE	Sh9SLp	0.0209	0.5058	11050	outcome	TRUE	reported	textfile	RPL26L1	1.3e-05	0.0298158	exposure	TRUE	reported	V7vv2w	textfile	2	TRUE
rs2954658	T	C	T	C	-0.3	-0.0128	0.422902	0.51	FALSE	FALSE	FALSE	Sh9SLp	0.0204	0.5307	11050	outcome	TRUE	reported	textfile	RPL8	3.3e-64	0.0177323	exposure	TRUE	reported	V7vv2w	textfile	2	TRUE
rs2983715	A	G	A	G	0.081	0.0242	0.272457	0.23	FALSE	FALSE	FALSE	Sh9SLp	0.0238	0.3086	11615	outcome	TRUE	reported	textfile	RPS8	5.1e-06	0.0177607	exposure	TRUE	reported	V7vv2w	textfile	2	TRUE
rs3087546	T	C	T	C	0.075	-0.0046	0.459597	0.57	FALSE	FALSE	FALSE	Sh9SLp	0.0216	0.8313	11075	outcome	TRUE	reported	textfile	RPLP2	1e-06	0.0153323	exposure	TRUE	reported	V7vv2w	textfile	2	TRUE
rs3133186	C	T	C	T	-0.35	0.0391	0.071802	0.07	FALSE	FALSE	FALSE	Sh9SLp	0.0388	0.3137	11615	outcome	TRUE	reported	textfile	RPS3	2.6e-28	0.0317182	exposure	TRUE	reported	V7vv2w	textfile	2	TRUE
rs323864	C	T	C	T	-0.29	-0.1642	0.10675	0.02	FALSE	FALSE	FALSE	Sh9SLp	0.086	0.05625	10249	outcome	TRUE	reported	textfile	RPL29	4.5e-15	0.0369891	exposure	TRUE	reported	V7vv2w	textfile	2	TRUE
rs323881	C	T	C	T	-0.16	-0.0538	0.140567	0.06	FALSE	FALSE	FALSE	Sh9SLp	0.0414	0.1936	11615	outcome	TRUE	reported	textfile	RPL29	1.3e-07	0.0303097	exposure	TRUE	reported	V7vv2w	textfile	2	TRUE
rs338786	T	C	T	C	0.17	-0.0348	0.098091	0.12	FALSE	FALSE	FALSE	Sh9SLp	0.0343	0.3106	9735	outcome	TRUE	reported	textfile	RPS2	1.2e-09	0.0279594	exposure	TRUE	reported	V7vv2w	textfile	2	TRUE
rs34071094	G	C	G	C	-0.19	-0.0507	0.072955	0.08	FALSE	TRUE	FALSE	Sh9SLp	0.0365	0.1646	11615	outcome	TRUE	reported	textfile	UBA52	5.3e-08	0.0349204	exposure	TRUE	reported	V7vv2w	textfile	2	TRUE
rs34659643	C	T	C	T	0.18	0.0236	0.211729	0.14	FALSE	FALSE	FALSE	Sh9SLp	0.0273	0.3891	11615	outcome	TRUE	reported	textfile	RPS23	2.7e-07	0.0349972	exposure	TRUE	reported	V7vv2w	textfile	2	TRUE
rs35009020	C	G	C	G	0.11	-0.0001	0.320794	0.41	FALSE	TRUE	FALSE	Sh9SLp	0.0217	0.9952	11050	outcome	TRUE	reported	textfile	RPS19	7.7e-07	0.0222545	exposure	TRUE	reported	V7vv2w	textfile	2	TRUE
rs35373018	C	T	C	T	-0.13	0.0446	0.058951	0.08	FALSE	FALSE	FALSE	Sh9SLp	0.0543	0.412	8182	outcome	TRUE	reported	textfile	RPL14	7.8e-05	0.0329075	exposure	TRUE	reported	V7vv2w	textfile	2	TRUE
rs3738	C	A	C	A	-0.44	-0.0045	0.32623	0.31	FALSE	FALSE	FALSE	Sh9SLp	0.0208	0.8299	11615	outcome	TRUE	reported	textfile	RPS23	9.3e-75	0.0240521	exposure	TRUE	reported	V7vv2w	textfile	2	TRUE
rs3772143	G	T	G	T	-0.35	0.0083	0.491733	0.51	FALSE	FALSE	FALSE	Sh9SLp	0.0194	0.6676	11615	outcome	TRUE	reported	textfile	RPSA	1.3e-56	0.0220752	exposure	TRUE	reported	V7vv2w	textfile	2	TRUE
rs3772145	T	C	T	C	-0.3	-0.0091	0.054076	0.03	FALSE	FALSE	FALSE	Sh9SLp	0.0634	0.8852	10711	outcome	TRUE	reported	textfile	RPSA	4.8e-05	0.0737979	exposure	TRUE	reported	V7vv2w	textfile	2	TRUE
rs3810232	C	A	C	A	-0.32	0.0201	0.297459	0.38	FALSE	FALSE	FALSE	Sh9SLp	0.0197	0.308	11615	outcome	TRUE	reported	textfile	RPS9	1.3e-45	0.0225742	exposure	TRUE	reported	V7vv2w	textfile	2	TRUE
rs3935304	G	A	G	A	0.32	0.0154	0.144612	0.11	FALSE	FALSE	FALSE	Sh9SLp	0.0313	0.6231	11615	outcome	TRUE	reported	textfile	RPL12	3.8e-19	0.0357836	exposure	TRUE	reported	V7vv2w	textfile	2	TRUE
rs41270113	T	A	T	A	0.21	-0.0475	0.061308	0.08	FALSE	TRUE	FALSE	Sh9SLp	0.039	0.2232	11615	outcome	TRUE	reported	textfile	RPS6	6.7e-07	0.0422547	exposure	TRUE	reported	V7vv2w	textfile	2	TRUE
rs4252561	C	G	C	G	-0.11	0.0177	0.263435	0.3	FALSE	TRUE	FALSE	Sh9SLp	0.0227	0.4358	11075	outcome	TRUE	reported	textfile	RPL28	1.8e-08	0.0195375	exposure	TRUE	reported	V7vv2w	textfile	2	TRUE
rs4330728	A	G	A	G	-0.083	-0.0039	0.382275	0.45	FALSE	FALSE	FALSE	Sh9SLp	0.0224	0.862	11050	outcome	TRUE	reported	textfile	RPL8	4.5e-05	0.0203422	exposure	TRUE	reported	V7vv2w	textfile	2	TRUE
rs4337589	A	G	A	G	-0.088	-0.0086	0.418202	0.47	FALSE	FALSE	FALSE	Sh9SLp	0.0192	0.6554	11615	outcome	TRUE	reported	textfile	RPL14	1.5e-05	0.0203295	exposure	TRUE	reported	V7vv2w	textfile	2	TRUE
rs434755	C	T	C	T	0.11	0.0077	0.7132	0.3	FALSE	FALSE	FALSE	Sh9SLp	0.0233	0.7416	10510	outcome	TRUE	reported	textfile	RPS9	5.9e-06	0.0242829	exposure	TRUE	reported	V7vv2w	textfile	2	TRUE
rs4386433	G	A	G	A	0.29	-0.0098	0.035444	0.06	FALSE	FALSE	FALSE	Sh9SLp	0.0428	0.8185	11615	outcome	TRUE	reported	textfile	RPSA	1.2e-05	0.0662465	exposure	TRUE	reported	V7vv2w	textfile	2	TRUE
rs4417323	G	C	G	C	0.39	0.0404	0.188984	0.25	FALSE	TRUE	FALSE	Sh9SLp	0.0312	0.1949	10510	outcome	TRUE	reported	textfile	RPS26	5.3e-08	0.0716788	exposure	TRUE	reported	V7vv2w	textfile	2	TRUE
rs45583031	T	C	T	C	0.19	0.0206	0.04566	0.06	FALSE	FALSE	FALSE	Sh9SLp	0.0426	0.6293	11615	outcome	TRUE	reported	textfile	RPL36	5e-07	0.0378011	exposure	TRUE	reported	V7vv2w	textfile	2	TRUE
rs45589231	G	C	G	C	-0.47	-0.0427	0.024811	0.03	FALSE	TRUE	FALSE	Sh9SLp	0.0667	0.522	11432	outcome	TRUE	reported	textfile	RPL36AL	2.2e-08	0.0839962	exposure	TRUE	reported	V7vv2w	textfile	2	TRUE
rs4785577	A	G	A	G	0.099	-0.0558	0.207788	0.29	FALSE	FALSE	FALSE	Sh9SLp	0.0252	0.02701	11050	outcome	TRUE	reported	textfile	RPL13	5.8e-05	0.0246219	exposure	TRUE	reported	V7vv2w	textfile	2	TRUE
rs4807781	A	G	A	G	-0.4	0.0289	0.01866	0.02	FALSE	FALSE	FALSE	Sh9SLp	0.076	0.7034	10711	outcome	TRUE	reported	textfile	RPL36	1.1e-08	0.0699969	exposure	TRUE	reported	V7vv2w	textfile	2	TRUE
rs4925813	G	A	G	A	-0.12	-0.0176	0.298591	0.61	FALSE	FALSE	FALSE	Sh9SLp	0.02	0.3788	11615	outcome	TRUE	reported	textfile	RPL8	2.4e-08	0.0215039	exposure	TRUE	reported	V7vv2w	textfile	2	TRUE
rs536262	T	C	T	C	-0.15	-0.0112	0.168498	0.11	FALSE	FALSE	FALSE	Sh9SLp	0.0319	0.7244	11615	outcome	TRUE	reported	textfile	RPL12	1.7e-05	0.0348753	exposure	TRUE	reported	V7vv2w	textfile	2	TRUE
rs55836769	G	T	G	T	-0.15	0.0328	0.099463	0.14	FALSE	FALSE	FALSE	Sh9SLp	0.0303	0.2797	11050	outcome	TRUE	reported	textfile	RPL8	2.4e-06	0.0318036	exposure	TRUE	reported	V7vv2w	textfile	2	TRUE
rs57317131	C	G	C	G	-0.16	0.0046	0.32294	0.37	FALSE	TRUE	FALSE	Sh9SLp	0.0327	0.8893	8130	outcome	TRUE	reported	textfile	RPS9	2e-09	0.0266764	exposure	TRUE	reported	V7vv2w	textfile	2	TRUE
rs58971671	A	G	A	G	0.47	-0.0284	0.122632	0.04	FALSE	FALSE	FALSE	Sh9SLp	0.0547	0.6036	11202	outcome	TRUE	reported	textfile	RPL9	2.8e-08	0.0846313	exposure	TRUE	reported	V7vv2w	textfile	2	TRUE
rs606851	G	A	G	A	0.11	-0.0072	0.294	0.7	FALSE	FALSE	FALSE	Sh9SLp	0.0276	0.7937	9358	outcome	TRUE	reported	textfile	RPS9	2.7e-05	0.0262067	exposure	TRUE	reported	V7vv2w	textfile	2	TRUE
rs61875926	G	C	G	C	-0.15	0.0148	0.08157	0.1	FALSE	TRUE	FALSE	Sh9SLp	0.0369	0.6889	11050	outcome	TRUE	reported	textfile	RPL27A	3.1e-08	0.0270969	exposure	TRUE	reported	V7vv2w	textfile	2	TRUE
rs61892856	A	G	A	G	-0.31	0.1374	0.009525	0.02	FALSE	FALSE	FALSE	Sh9SLp	0.0861	0.1106	9586	outcome	TRUE	reported	textfile	RPS3	6.9e-05	0.0778952	exposure	TRUE	reported	V7vv2w	textfile	2	TRUE
rs61937675	G	C	G	C	0.55	0.036	0.099719	0.15	FALSE	TRUE	FALSE	Sh9SLp	0.0395	0.3632	8820	outcome	TRUE	reported	textfile	RPS26	1.2e-12	0.0774062	exposure	TRUE	reported	V7vv2w	textfile	2	TRUE
rs61939013	C	T	C	T	0.71	0.0352	0.026591	0.03	FALSE	FALSE	FALSE	Sh9SLp	0.0943	0.709	6646	outcome	TRUE	reported	textfile	RPS26	4.5e-07	0.140692	exposure	TRUE	reported	V7vv2w	textfile	2	TRUE
rs62011974	T	C	T	C	-0.17	0.0532	0.03207	0.05	FALSE	FALSE	FALSE	Sh9SLp	0.0482	0.2698	11615	outcome	TRUE	reported	textfile	RPS17	6.1e-06	0.0375866	exposure	TRUE	reported	V7vv2w	textfile	2	TRUE
rs62106034	A	C	A	C	-0.25	0.0031	0.059305	0.06	FALSE	FALSE	FALSE	Sh9SLp	0.0495	0.9493	10510	outcome	TRUE	reported	textfile	RPS7	8.2e-10	0.0407099	exposure	TRUE	reported	V7vv2w	textfile	2	TRUE
rs62242640	T	C	T	C	0.3	-0.0093	0.057084	0.05	FALSE	FALSE	FALSE	Sh9SLp	0.0671	0.8896	10019	outcome	TRUE	reported	textfile	RPSA	2.7e-05	0.0714729	exposure	TRUE	reported	V7vv2w	textfile	2	TRUE
rs6421968	T	G	T	G	0.072	0.0043	0.332961	0.25	FALSE	FALSE	FALSE	Sh9SLp	0.0262	0.8695	11050	outcome	TRUE	reported	textfile	RPLP2	5.9e-05	0.0179248	exposure	TRUE	reported	V7vv2w	textfile	2	TRUE
rs6511006	A	C	A	C	-0.086	-0.0027	0.266058	0.66	FALSE	FALSE	FALSE	Sh9SLp	0.0247	0.9138	10510	outcome	TRUE	reported	textfile	UBA52	4.1e-05	0.0209666	exposure	TRUE	reported	V7vv2w	textfile	2	TRUE
rs651601	C	T	C	T	0.096	0.0065	0.454519	0.34	FALSE	FALSE	FALSE	Sh9SLp	0.0205	0.7502	11615	outcome	TRUE	reported	textfile	RPS16	1.4e-11	0.0142056	exposure	TRUE	reported	V7vv2w	textfile	2	TRUE
rs6572611	G	A	G	A	0.21	0.0057	0.154254	0.18	FALSE	FALSE	FALSE	Sh9SLp	0.0341	0.8663	9820	outcome	TRUE	reported	textfile	RPL36AL	5.8e-08	0.0387107	exposure	TRUE	reported	V7vv2w	textfile	2	TRUE
rs6572634	A	C	A	C	0.14	-0.0115	0.462776	0.46	FALSE	FALSE	FALSE	Sh9SLp	0.02	0.5679	11050	outcome	TRUE	reported	textfile	RPL36AL	8.7e-06	0.0314805	exposure	TRUE	reported	V7vv2w	textfile	2	TRUE
rs6572642	G	A	G	A	-0.16	0.0357	0.165104	0.84	FALSE	FALSE	FALSE	Sh9SLp	0.0275	0.1947	11615	outcome	TRUE	reported	textfile	RPL36AL	6.6e-05	0.0400976	exposure	TRUE	reported	V7vv2w	textfile	2	TRUE
rs6823497	A	C	A	C	-0.17	0.0235	0.486621	0.5	FALSE	FALSE	FALSE	Sh9SLp	0.0196	0.2296	11615	outcome	TRUE	reported	textfile	RPL9	3e-05	0.0407335	exposure	TRUE	reported	V7vv2w	textfile	2	TRUE
rs686657	A	G	A	G	0.18	0.0066	0.409648	0.59	FALSE	FALSE	FALSE	Sh9SLp	0.0194	0.7337	11615	outcome	TRUE	reported	textfile	RPS23	7e-12	0.026248	exposure	TRUE	reported	V7vv2w	textfile	2	TRUE
rs6904716	G	A	G	A	-0.11	0.0501	0.448657	0.44	FALSE	FALSE	FALSE	Sh9SLp	0.0191	0.008786	11615	outcome	TRUE	reported	textfile	RPS18	1.1e-05	0.0250198	exposure	TRUE	reported	V7vv2w	textfile	2	TRUE
rs6925243	G	A	G	A	0.21	0.0048	0.221424	0.1	FALSE	FALSE	FALSE	Sh9SLp	0.0337	0.8872	11615	outcome	TRUE	reported	textfile	RPS10	8.7e-14	0.0281529	exposure	TRUE	reported	V7vv2w	textfile	2	TRUE
rs6936419	A	C	A	C	-0.066	-0.0037	0.377537	0.49	FALSE	FALSE	FALSE	Sh9SLp	0.0195	0.8489	11615	outcome	TRUE	reported	textfile	RPS10	0.00014	0.0173312	exposure	TRUE	reported	V7vv2w	textfile	2	TRUE
rs7035698	G	A	G	A	0.16	-0.0059	0.113164	0.14	FALSE	FALSE	FALSE	Sh9SLp	0.0293	0.8404	11050	outcome	TRUE	reported	textfile	RPL12	5.4e-06	0.0351755	exposure	TRUE	reported	V7vv2w	textfile	2	TRUE
rs7040019	A	G	A	G	0.15	-0.0191	0.49654	0.52	FALSE	FALSE	FALSE	Sh9SLp	0.0215	0.3734	11050	outcome	TRUE	reported	textfile	RPL12	2.6e-10	0.0237307	exposure	TRUE	reported	V7vv2w	textfile	2	TRUE
rs71497661	T	C	T	C	-0.18	0.0941	0.077107	0.12	FALSE	FALSE	FALSE	Sh9SLp	0.0342	0.005883	11050	outcome	TRUE	reported	textfile	RPL12	7.7e-08	0.0334945	exposure	TRUE	reported	V7vv2w	textfile	2	TRUE
rs71522403	G	C	G	C	0.2	0.0613	0.086265	0.13	FALSE	TRUE	FALSE	Sh9SLp	0.0398	0.1232	10510	outcome	TRUE	reported	textfile	RPL8	3.5e-11	0.030194	exposure	TRUE	reported	V7vv2w	textfile	2	TRUE
rs71522414	A	C	A	C	-0.1	0.0093	0.2456	0.15	FALSE	FALSE	FALSE	Sh9SLp	0.0353	0.7922	11050	outcome	TRUE	reported	textfile	RPL8	0.00011	0.0258571	exposure	TRUE	reported	V7vv2w	textfile	2	TRUE
rs7248357	C	T	C	T	0.085	-0.0425	0.4183	0.44	FALSE	FALSE	FALSE	Sh9SLp	0.0219	0.05267	11050	outcome	TRUE	reported	textfile	RPS5	7.2e-06	0.0189407	exposure	TRUE	reported	V7vv2w	textfile	2	TRUE
rs72680061	G	A	G	A	0.19	-0.0114	0.152357	0.19	FALSE	FALSE	FALSE	Sh9SLp	0.0285	0.6902	11050	outcome	TRUE	reported	textfile	RPL36AL	1.7e-07	0.0363326	exposure	TRUE	reported	V7vv2w	textfile	2	TRUE
rs72699315	G	A	G	A	-0.16	-0.0625	0.068173	0.1	FALSE	FALSE	FALSE	Sh9SLp	0.0393	0.112	10510	outcome	TRUE	reported	textfile	RPL8	2e-06	0.0336599	exposure	TRUE	reported	V7vv2w	textfile	2	TRUE
rs72751675	C	A	C	A	0.1	-0.0087	0.081669	0.2	FALSE	FALSE	FALSE	Sh9SLp	0.0242	0.7188	11615	outcome	TRUE	reported	textfile	RPS17	3.2e-07	0.0195646	exposure	TRUE	reported	V7vv2w	textfile	2	TRUE
rs72847445	G	A	G	A	-0.29	0.0146	0.020677	0.03	FALSE	FALSE	FALSE	Sh9SLp	0.061	0.8107	11202	outcome	TRUE	reported	textfile	RPL27A	8.1e-05	0.0735775	exposure	TRUE	reported	V7vv2w	textfile	2	TRUE
rs72896138	A	G	A	G	-0.5	-0.0516	0.01689	0.03	FALSE	FALSE	FALSE	Sh9SLp	0.0651	0.4276	11019	outcome	TRUE	reported	textfile	RPS18	1.3e-09	0.0824077	exposure	TRUE	reported	V7vv2w	textfile	2	TRUE
rs72964039	G	C	G	C	-0.18	-0.0062	0.121195	0.03	FALSE	TRUE	FALSE	Sh9SLp	0.0761	0.9351	10711	outcome	TRUE	reported	textfile	RPL29	6.9e-06	0.0400289	exposure	TRUE	reported	V7vv2w	textfile	2	TRUE
rs730264	G	A	G	A	-0.25	0.0131	0.191682	0.19	FALSE	FALSE	FALSE	Sh9SLp	0.0245	0.5927	11615	outcome	TRUE	reported	textfile	RPL13	4.5e-24	0.0247033	exposure	TRUE	reported	V7vv2w	textfile	2	TRUE
rs73072968	T	C	T	C	-0.2	-0.079	0.015316	0.03	FALSE	FALSE	FALSE	Sh9SLp	0.0718	0.2711	10171	outcome	TRUE	reported	textfile	RPL29	0.00017	0.0531933	exposure	TRUE	reported	V7vv2w	textfile	2	TRUE
rs731835	C	T	C	T	-0.18	0.0266	0.33096	0.33	FALSE	FALSE	FALSE	Sh9SLp	0.021	0.2064	11615	outcome	TRUE	reported	textfile	RPS5	1.5e-25	0.0172285	exposure	TRUE	reported	V7vv2w	textfile	2	TRUE
rs73240613	G	T	G	T	0.44	-0.014	0.020772	0.04	FALSE	FALSE	FALSE	Sh9SLp	0.0565	0.805	11615	outcome	TRUE	reported	textfile	RPL9	2.2e-05	0.103686	exposure	TRUE	reported	V7vv2w	textfile	2	TRUE
rs74391990	G	C	G	C	-0.17	-0.1392	0.045145	0.02	FALSE	TRUE	FALSE	Sh9SLp	0.0779	0.07409	9200	outcome	TRUE	reported	textfile	RPS2	4e-05	0.0413879	exposure	TRUE	reported	V7vv2w	textfile	2	TRUE
rs74413342	A	C	A	C	-0.29	0.0006	0.093762	0.09	FALSE	FALSE	FALSE	Sh9SLp	0.0335	0.9864	11615	outcome	TRUE	reported	textfile	RPSA	1.3e-10	0.0451209	exposure	TRUE	reported	V7vv2w	textfile	2	TRUE
rs74711338	A	G	A	G	0.17	0.0255	0.236045	0.3	FALSE	FALSE	FALSE	Sh9SLp	0.0279	0.3601	9820	outcome	TRUE	reported	textfile	RPL36AL	6.3e-07	0.0341243	exposure	TRUE	reported	V7vv2w	textfile	2	TRUE
rs7484027	A	T	A	T	0.09	-0.0361	0.457344	0.45	FALSE	TRUE	TRUE	Sh9SLp	0.0195	0.0643	11615	outcome	TRUE	reported	textfile	RPS13	7.1e-06	0.0200416	exposure	TRUE	reported	V7vv2w	textfile	2	FALSE
rs7484392	C	T	C	T	-0.67	-0.0395	0.048611	0.05	FALSE	FALSE	FALSE	Sh9SLp	0.0743	0.5948	7923	outcome	TRUE	reported	textfile	RPS26	2.3e-06	0.141796	exposure	TRUE	reported	V7vv2w	textfile	2	TRUE
rs75279419	G	A	G	A	-0.12	0.0726	0.096215	0.13	FALSE	FALSE	FALSE	Sh9SLp	0.0331	0.0284	11050	outcome	TRUE	reported	textfile	RPL3	1.7e-05	0.0279002	exposure	TRUE	reported	V7vv2w	textfile	2	TRUE
rs75331044	C	T	C	T	0.26	0.0285	0.096412	0.14	FALSE	FALSE	FALSE	Sh9SLp	0.0309	0.3571	11050	outcome	TRUE	reported	textfile	RPL9	1.4e-05	0.0598546	exposure	TRUE	reported	V7vv2w	textfile	2	TRUE
rs75402468	T	C	T	C	-0.23	0.0704	0.057792	0.02	FALSE	FALSE	FALSE	Sh9SLp	0.0707	0.3191	11019	outcome	TRUE	reported	textfile	RPS24	5.4e-07	0.0458942	exposure	TRUE	reported	V7vv2w	textfile	2	TRUE
rs75679752	A	G	A	G	0.16	-0.0239	0.094182	0.13	FALSE	FALSE	FALSE	Sh9SLp	0.0288	0.406	11615	outcome	TRUE	reported	textfile	RPS23	9.6e-05	0.0410205	exposure	TRUE	reported	V7vv2w	textfile	2	TRUE
rs76092567	A	G	A	G	-0.13	0.0323	0.092009	0.11	FALSE	FALSE	FALSE	Sh9SLp	0.0359	0.3689	11050	outcome	TRUE	reported	textfile	UBA52	3.7e-05	0.0315117	exposure	TRUE	reported	V7vv2w	textfile	2	TRUE
rs76132381	T	C	T	C	-0.21	-0.0157	0.009748	0.02	FALSE	FALSE	FALSE	Sh9SLp	0.1013	0.8768	8738	outcome	TRUE	reported	textfile	RPS8	0.00013	0.054881	exposure	TRUE	reported	V7vv2w	textfile	2	TRUE
rs76184771	G	A	G	A	0.12	0.0136	0.154593	0.14	FALSE	FALSE	FALSE	Sh9SLp	0.029	0.6384	11615	outcome	TRUE	reported	textfile	UBA52	3.4e-05	0.0289514	exposure	TRUE	reported	V7vv2w	textfile	2	TRUE
rs76445127	A	G	A	G	-0.26	0.0329	0.0284	0.03	FALSE	FALSE	FALSE	Sh9SLp	0.0593	0.5786	11075	outcome	TRUE	reported	textfile	RPL28	2e-06	0.0546974	exposure	TRUE	reported	V7vv2w	textfile	2	TRUE
rs76664897	T	C	T	C	0.29	-0.0038	0.04399	0.04	FALSE	FALSE	FALSE	Sh9SLp	0.0558	0.9454	11615	outcome	TRUE	reported	textfile	RPSA	5.8e-06	0.0639675	exposure	TRUE	reported	V7vv2w	textfile	2	TRUE
rs76690650	A	G	A	G	0.2	0.0094	0.032726	0.05	FALSE	FALSE	FALSE	Sh9SLp	0.0533	0.8598	11615	outcome	TRUE	reported	textfile	RPL10A	0.00018	0.0533967	exposure	TRUE	reported	V7vv2w	textfile	2	TRUE
rs77102251	G	C	G	C	-0.48	0.0104	0.044661	0.06	FALSE	TRUE	FALSE	Sh9SLp	0.0487	0.8303	11050	outcome	TRUE	reported	textfile	RPL9	1.9e-05	0.112246	exposure	TRUE	reported	V7vv2w	textfile	2	TRUE
rs773126	A	T	A	T	0.31	0.0003	0.369721	0.41	FALSE	TRUE	FALSE	Sh9SLp	0.0266	0.9921	10202	outcome	TRUE	reported	textfile	RPS26	4.3e-07	0.0613233	exposure	TRUE	reported	V7vv2w	textfile	2	TRUE
rs77352494	G	A	G	A	0.24	0.0106	0.117393	0.13	FALSE	FALSE	FALSE	Sh9SLp	0.0288	0.7143	11615	outcome	TRUE	reported	textfile	RPL9	4.3e-05	0.0586691	exposure	TRUE	reported	V7vv2w	textfile	2	TRUE
rs77657644	A	G	A	G	-0.16	0.0148	0.049595	0.06	FALSE	FALSE	FALSE	Sh9SLp	0.0424	0.7266	11615	outcome	TRUE	reported	textfile	RPS8	3e-06	0.0342552	exposure	TRUE	reported	V7vv2w	textfile	2	TRUE
rs77710836	T	C	T	C	-0.38	0.0722	0.015451	0.03	FALSE	FALSE	FALSE	Sh9SLp	0.0718	0.3142	10454	outcome	TRUE	reported	textfile	RPS24	4.6e-06	0.0829287	exposure	TRUE	reported	V7vv2w	textfile	2	TRUE
rs77796932	A	G	A	G	0.18	0.034	0.015094	0.03	FALSE	FALSE	FALSE	Sh9SLp	0.0718	0.636	10557	outcome	TRUE	reported	textfile	RPS8	0.00011	0.0465428	exposure	TRUE	reported	V7vv2w	textfile	2	TRUE
rs78016521	T	C	T	C	-0.3	-0.0502	0.011372	0.02	FALSE	FALSE	FALSE	Sh9SLp	0.1037	0.6284	8048	outcome	TRUE	reported	textfile	RPL13	8.4e-05	0.0762836	exposure	TRUE	reported	V7vv2w	textfile	2	TRUE
rs78454682	A	G	A	G	-0.13	-0.03	0.092104	0.12	FALSE	FALSE	FALSE	Sh9SLp	0.0309	0.3309	11615	outcome	TRUE	reported	textfile	RPS10	1.5e-06	0.0270201	exposure	TRUE	reported	V7vv2w	textfile	2	TRUE
rs79269008	G	A	G	A	-0.9	-0.0628	0.023001	0.02	FALSE	FALSE	FALSE	Sh9SLp	0.0781	0.4214	9606	outcome	TRUE	reported	textfile	RPS26	3.8e-06	0.19472	exposure	TRUE	reported	V7vv2w	textfile	2	TRUE
rs79592126	A	G	A	G	-0.58	0.075	0.01517	0.01	FALSE	FALSE	FALSE	Sh9SLp	0.091	0.4102	9843	outcome	TRUE	reported	textfile	RPS18	2.5e-10	0.0916709	exposure	TRUE	reported	V7vv2w	textfile	2	TRUE
rs79594160	T	C	T	C	-0.31	0.0729	0.022607	0.03	FALSE	FALSE	FALSE	Sh9SLp	0.0574	0.2044	10867	outcome	TRUE	reported	textfile	RPS20	4.8e-08	0.0567915	exposure	TRUE	reported	V7vv2w	textfile	2	TRUE
rs803686	A	G	A	G	-0.17	-0.0142	0.260888	0.3	FALSE	FALSE	FALSE	Sh9SLp	0.0209	0.4954	11615	outcome	TRUE	reported	textfile	RPS17	5.5e-22	0.0176377	exposure	TRUE	reported	V7vv2w	textfile	2	TRUE
rs9471939	T	A	T	A	-0.14	-0.016	0.204478	0.27	FALSE	TRUE	FALSE	Sh9SLp	0.0221	0.4689	11615	outcome	TRUE	reported	textfile	RPL7L1	8.2e-11	0.0693551	exposure	TRUE	reported	V7vv2w	textfile	2	TRUE
Adipose Visceral-Longevity 99p
SNP	effect_allele.exposure	other_allele.exposure	effect_allele.outcome	other_allele.outcome	beta.exposure	beta.outcome	eaf.exposure	eaf.outcome	remove	palindromic	ambiguous	id.outcome	se.outcome	pval.outcome	samplesize.outcome	outcome	mr_keep.outcome	pval_origin.outcome	data_source.outcome	gene.exposure	pval.exposure	se.exposure	exposure	mr_keep.exposure	pval_origin.exposure	id.exposure	data_source.exposure	action	mr_keep
rs10009783	G	A	G	A	0.22	-0.0462	0.207846	0.84	FALSE	FALSE	FALSE	PwkVQx	0.0428	0.2809	4524	outcome	TRUE	reported	textfile	RPL9	4.4e-05	0.0538502	exposure	TRUE	reported	V7vv2w	textfile	2	TRUE
rs10415576	C	T	C	T	-0.088	-0.0879	0.498882	0.4	FALSE	FALSE	FALSE	PwkVQx	0.0324	0.006718	4524	outcome	TRUE	reported	textfile	RPS11	1.2e-05	0.0201024	exposure	TRUE	reported	V7vv2w	textfile	2	TRUE
rs10422405	T	C	T	C	-0.4	-0.1284	0.066639	0.04	FALSE	FALSE	FALSE	PwkVQx	0.121	0.2887	3692	outcome	TRUE	reported	textfile	RPL18A	4.8e-15	0.0510722	exposure	TRUE	reported	V7vv2w	textfile	2	TRUE
rs1057232	A	G	A	G	-0.36	0.0167	0.41518	0.55	FALSE	FALSE	FALSE	PwkVQx	0.0303	0.5814	4524	outcome	TRUE	reported	textfile	RPS28	3.5e-48	0.0246829	exposure	TRUE	reported	V7vv2w	textfile	2	TRUE
rs10760461	T	C	T	C	-0.11	0.0674	0.476837	0.36	FALSE	FALSE	FALSE	PwkVQx	0.0311	0.02998	4524	outcome	TRUE	reported	textfile	RPL12	1.5e-05	0.0254119	exposure	TRUE	reported	V7vv2w	textfile	2	TRUE
rs10947541	A	G	A	G	0.24	-0.0732	0.024408	0.03	FALSE	FALSE	FALSE	PwkVQx	0.0927	0.4296	3915	outcome	TRUE	reported	textfile	RPL10A	2.8e-05	0.0572908	exposure	TRUE	reported	V7vv2w	textfile	2	TRUE
rs111428791	C	T	C	T	-0.51	-0.0413	0.018646	0.02	FALSE	FALSE	FALSE	PwkVQx	0.1837	0.8223	2409	outcome	TRUE	reported	textfile	RPL36AL	7.1e-08	0.0946439	exposure	TRUE	reported	V7vv2w	textfile	2	TRUE
rs111501007	A	T	A	T	0.22	0.0822	0.042964	0.03	FALSE	TRUE	FALSE	PwkVQx	0.1438	0.5676	2667	outcome	TRUE	reported	textfile	RPS13	3.4e-05	0.0530776	exposure	TRUE	reported	V7vv2w	textfile	2	TRUE
rs11171773	G	A	G	A	-0.59	0.0533	0.226101	0.92	FALSE	FALSE	FALSE	PwkVQx	0.0654	0.4152	4303	outcome	TRUE	reported	textfile	RPS26	4.1e-07	0.116503	exposure	TRUE	reported	V7vv2w	textfile	2	TRUE
rs11171821	A	G	A	G	-0.35	0.0023	0.140566	0.19	FALSE	FALSE	FALSE	PwkVQx	0.0476	0.9607	4117	outcome	TRUE	reported	textfile	RPS26	7.3e-05	0.0882437	exposure	TRUE	reported	V7vv2w	textfile	2	TRUE
rs111921744	A	G	A	G	-0.19	-0.0336	0.035357	0.04	FALSE	FALSE	FALSE	PwkVQx	0.0825	0.6838	4050	outcome	TRUE	reported	textfile	RPS8	3.7e-08	0.0345166	exposure	TRUE	reported	V7vv2w	textfile	2	TRUE
rs112098193	A	G	A	G	-0.19	0.1824	0.051956	0.04	FALSE	FALSE	FALSE	PwkVQx	0.1235	0.1398	3322	outcome	TRUE	reported	textfile	RPLP2	6.4e-05	0.0475291	exposure	TRUE	reported	V7vv2w	textfile	2	TRUE
rs11211176	A	G	A	G	0.069	0.0414	0.492205	0.53	FALSE	FALSE	FALSE	PwkVQx	0.0326	0.204	4154	outcome	TRUE	reported	textfile	RPS8	7.2e-06	0.0153754	exposure	TRUE	reported	V7vv2w	textfile	2	TRUE
rs11217125	C	T	C	T	-0.099	-0.0561	0.272884	0.24	FALSE	FALSE	FALSE	PwkVQx	0.0353	0.1118	4524	outcome	TRUE	reported	textfile	RPS25	1.3e-06	0.0204556	exposure	TRUE	reported	V7vv2w	textfile	2	TRUE
rs11259961	C	G	C	G	-0.15	-0.0339	0.034443	0.05	FALSE	TRUE	FALSE	PwkVQx	0.08	0.6717	4047	outcome	TRUE	reported	textfile	RPS17	8.4e-05	0.0381418	exposure	TRUE	reported	V7vv2w	textfile	2	TRUE
rs1129460	C	A	C	A	-0.15	-0.0197	0.098977	0.24	FALSE	FALSE	FALSE	PwkVQx	0.0706	0.7805	2457	outcome	TRUE	reported	textfile	RPS11	3.9e-06	0.0324912	exposure	TRUE	reported	V7vv2w	textfile	2	TRUE
rs1131017	G	C	G	C	-1.2	0.022	0.444089	0.42	FALSE	TRUE	TRUE	PwkVQx	0.0304	0.47	4524	outcome	TRUE	reported	textfile	RPS26	1e-200	0.0394366	exposure	TRUE	reported	V7vv2w	textfile	2	FALSE
rs113217276	T	C	T	C	-0.2	-0.0905	0.056504	0.06	FALSE	FALSE	FALSE	PwkVQx	0.098	0.3559	3545	outcome	TRUE	reported	textfile	RPL8	2.7e-06	0.042622	exposure	TRUE	reported	V7vv2w	textfile	2	TRUE
rs113225496	C	T	C	T	0.24	-0.0459	0.089457	0.08	FALSE	FALSE	FALSE	PwkVQx	0.0726	0.5278	3933	outcome	TRUE	reported	textfile	RPS28	3.2e-07	0.0469551	exposure	TRUE	reported	V7vv2w	textfile	2	TRUE
rs113423134	T	C	T	C	0.27	0.0194	0.143466	0.17	FALSE	FALSE	FALSE	PwkVQx	0.0405	0.6313	4524	outcome	TRUE	reported	textfile	RPL9	3.3e-06	0.0580495	exposure	TRUE	reported	V7vv2w	textfile	2	TRUE
rs113636971	G	A	G	A	-0.13	0.0449	0.076913	0.07	FALSE	FALSE	FALSE	PwkVQx	0.0842	0.5938	3801	outcome	TRUE	reported	textfile	RPS3	0.00011	0.0336143	exposure	TRUE	reported	V7vv2w	textfile	2	TRUE
rs11553984	T	C	T	C	-0.52	0.0403	0.025239	0.03	FALSE	FALSE	FALSE	PwkVQx	0.1083	0.7101	3545	outcome	TRUE	reported	textfile	RPL10A	1.4e-15	0.0651184	exposure	TRUE	reported	V7vv2w	textfile	2	TRUE
rs116547500	C	G	C	G	-0.54	0.0523	0.01699	0.03	FALSE	TRUE	FALSE	PwkVQx	0.1116	0.6396	3692	outcome	TRUE	reported	textfile	RPSA	2.7e-16	0.0659661	exposure	TRUE	reported	V7vv2w	textfile	2	TRUE
rs116559528	G	T	G	T	-0.28	0.0623	0.058801	0.07	FALSE	FALSE	FALSE	PwkVQx	0.0705	0.3766	4050	outcome	TRUE	reported	textfile	RPSA	4.3e-09	0.0476821	exposure	TRUE	reported	V7vv2w	textfile	2	TRUE
rs116585983	A	G	A	G	0.61	0.0317	0.0145	0.02	FALSE	FALSE	FALSE	PwkVQx	0.1491	0.8314	2829	outcome	TRUE	reported	textfile	RPL9	7.3e-06	0.136017	exposure	TRUE	reported	V7vv2w	textfile	2	TRUE
rs11669305	T	C	T	C	0.11	0.0355	0.153121	0.19	FALSE	FALSE	FALSE	PwkVQx	0.0481	0.4597	4154	outcome	TRUE	reported	textfile	RPS5	1.1e-06	0.0225741	exposure	TRUE	reported	V7vv2w	textfile	2	TRUE
rs11669559	G	C	G	C	-0.17	0.0601	0.141111	0.13	FALSE	TRUE	FALSE	PwkVQx	0.0483	0.2134	4524	outcome	TRUE	reported	textfile	RPS28	2.6e-05	0.040419	exposure	TRUE	reported	V7vv2w	textfile	2	TRUE
rs11673607	G	C	G	C	0.21	0.1045	0.8596	0.77	FALSE	TRUE	FALSE	PwkVQx	0.0524	0.04606	3879	outcome	TRUE	reported	textfile	RPS9	3e-12	0.0300958	exposure	TRUE	reported	V7vv2w	textfile	2	TRUE
rs11678235	A	G	A	G	0.12	0.0298	0.09594	0.12	FALSE	FALSE	FALSE	PwkVQx	0.0499	0.5501	4524	outcome	TRUE	reported	textfile	RPS7	3.6e-05	0.0290433	exposure	TRUE	reported	V7vv2w	textfile	2	TRUE
rs116878368	T	A	T	A	0.25	-0.0457	0.032002	0.05	FALSE	TRUE	FALSE	PwkVQx	0.1078	0.6715	3545	outcome	TRUE	reported	textfile	RPS9	2.2e-05	0.0589128	exposure	TRUE	reported	V7vv2w	textfile	2	TRUE
rs11715522	C	A	C	A	0.18	-0.0159	0.359131	0.39	FALSE	FALSE	FALSE	PwkVQx	0.0333	0.6335	4154	outcome	TRUE	reported	textfile	RPSA	2.7e-11	0.0270186	exposure	TRUE	reported	V7vv2w	textfile	2	TRUE
rs117396149	A	G	A	G	0.94	-0.0933	0.026158	0.03	FALSE	FALSE	FALSE	PwkVQx	0.1555	0.5484	2371	outcome	TRUE	reported	textfile	RPS26	2.7e-09	0.158013	exposure	TRUE	reported	V7vv2w	textfile	2	TRUE
rs117427783	C	T	C	T	0.68	-0.0917	0.042196	0.06	FALSE	FALSE	FALSE	PwkVQx	0.0955	0.3367	3680	outcome	TRUE	reported	textfile	RPS26	1.1e-05	0.154668	exposure	TRUE	reported	V7vv2w	textfile	2	TRUE
rs117608214	A	G	A	G	-0.17	-0.2009	0.018235	0.05	FALSE	FALSE	FALSE	PwkVQx	0.1128	0.07484	3199	outcome	TRUE	reported	textfile	RPL19	0.0001	0.0436952	exposure	TRUE	reported	V7vv2w	textfile	2	TRUE
rs117872319	C	A	C	A	-0.17	0.2043	0.03249	0.05	FALSE	FALSE	FALSE	PwkVQx	0.0779	0.00876	3915	outcome	TRUE	reported	textfile	RPS17	6.5e-05	0.0425651	exposure	TRUE	reported	V7vv2w	textfile	2	TRUE
rs118151919	T	A	T	A	-0.13	-0.0344	0.07787	0.09	FALSE	TRUE	FALSE	PwkVQx	0.0543	0.5264	4524	outcome	TRUE	reported	textfile	RPS27A	1.2e-05	0.0296967	exposure	TRUE	reported	V7vv2w	textfile	2	TRUE
rs11860237	G	A	G	A	0.092	0.0076	0.308506	0.79	FALSE	FALSE	FALSE	PwkVQx	0.0378	0.8413	4524	outcome	TRUE	reported	textfile	RPL13	8e-05	0.0233242	exposure	TRUE	reported	V7vv2w	textfile	2	TRUE
rs11955828	C	A	C	A	-0.11	-0.0229	0.403319	0.68	FALSE	FALSE	FALSE	PwkVQx	0.0345	0.5066	4154	outcome	TRUE	reported	textfile	RPS23	5.9e-05	0.0273852	exposure	TRUE	reported	V7vv2w	textfile	2	TRUE
rs12323544	C	T	C	T	0.17	0.0472	0.446052	0.37	FALSE	FALSE	FALSE	PwkVQx	0.0308	0.1258	4524	outcome	TRUE	reported	textfile	RPL36AL	2.8e-07	0.0330969	exposure	TRUE	reported	V7vv2w	textfile	2	TRUE
rs12351518	C	G	C	G	-0.16	-0.0202	0.205355	0.11	FALSE	TRUE	FALSE	PwkVQx	0.049	0.6797	4524	outcome	TRUE	reported	textfile	RPS6	4.5e-09	0.027282	exposure	TRUE	reported	V7vv2w	textfile	2	TRUE
rs12542335	T	C	T	C	0.2	-0.005	0.078377	0.1	FALSE	FALSE	FALSE	PwkVQx	0.0605	0.9336	4154	outcome	TRUE	reported	textfile	RPL8	4.1e-07	0.0394925	exposure	TRUE	reported	V7vv2w	textfile	2	TRUE
rs12618238	C	G	C	G	-0.088	-0.0139	0.293478	0.3	FALSE	TRUE	FALSE	PwkVQx	0.0365	0.7029	4154	outcome	TRUE	reported	textfile	RPS7	3.6e-05	0.0212984	exposure	TRUE	reported	V7vv2w	textfile	2	TRUE
rs12831884	G	T	G	T	0.61	0.0118	0.044103	0.06	FALSE	FALSE	FALSE	PwkVQx	0.0629	0.8516	4303	outcome	TRUE	reported	textfile	RPS26	2.7e-05	0.145328	exposure	TRUE	reported	V7vv2w	textfile	2	TRUE
rs13089215	C	T	C	T	-0.11	0.0002	0.456131	0.68	FALSE	FALSE	FALSE	PwkVQx	0.0329	0.9946	4524	outcome	TRUE	reported	textfile	RPL14	8.2e-08	0.0205122	exposure	TRUE	reported	V7vv2w	textfile	2	TRUE
rs13112045	T	C	T	C	-0.35	0.0167	0.12394	0.14	FALSE	FALSE	FALSE	PwkVQx	0.0434	0.7007	4524	outcome	TRUE	reported	textfile	RPL9	2.5e-10	0.0553186	exposure	TRUE	reported	V7vv2w	textfile	2	TRUE
rs13150827	G	A	G	A	-0.23	0.078	0.41151	0.35	FALSE	FALSE	FALSE	PwkVQx	0.0312	0.01239	4524	outcome	TRUE	reported	textfile	RPL9	3.9e-08	0.0418538	exposure	TRUE	reported	V7vv2w	textfile	2	TRUE
rs13170880	T	A	T	A	0.27	0.0607	0.037942	0.05	FALSE	TRUE	FALSE	PwkVQx	0.0939	0.5182	3545	outcome	TRUE	reported	textfile	RPS23	1.9e-05	0.0631383	exposure	TRUE	reported	V7vv2w	textfile	2	TRUE
rs13176457	A	C	A	C	0.16	0.001	0.216853	0.2	FALSE	FALSE	FALSE	PwkVQx	0.0386	0.9788	4524	outcome	TRUE	reported	textfile	RPS23	5.6e-07	0.0319711	exposure	TRUE	reported	V7vv2w	textfile	2	TRUE
rs137682	C	A	C	A	0.078	0.014	0.308266	0.76	FALSE	FALSE	FALSE	PwkVQx	0.0351	0.6905	4524	outcome	TRUE	reported	textfile	RPL3	8.4e-05	0.0198337	exposure	TRUE	reported	V7vv2w	textfile	2	TRUE
rs142027015	G	C	G	C	-0.3	0.0673	0.018	0.02	FALSE	TRUE	FALSE	PwkVQx	0.1701	0.6923	2902	outcome	TRUE	reported	textfile	RPL10A	0.00016	0.0794699	exposure	TRUE	reported	V7vv2w	textfile	2	TRUE
rs144131441	C	G	C	G	-0.79	0.0085	0.049579	0.07	FALSE	TRUE	FALSE	PwkVQx	0.0687	0.901	4303	outcome	TRUE	reported	textfile	RPS26	8.5e-12	0.115669	exposure	TRUE	reported	V7vv2w	textfile	2	TRUE
rs144134171	A	G	A	G	0.88	-0.0519	0.018036	0.02	FALSE	FALSE	FALSE	PwkVQx	0.1428	0.7164	3692	outcome	TRUE	reported	textfile	RPL3L	4.1e-06	0.0693551	exposure	TRUE	reported	V7vv2w	textfile	2	TRUE
rs145044106	C	G	C	G	-0.48	-0.0619	0.008986	0.03	FALSE	TRUE	FALSE	PwkVQx	0.1269	0.6259	3692	outcome	TRUE	reported	textfile	RPS18	7e-07	0.0967476	exposure	TRUE	reported	V7vv2w	textfile	2	TRUE
rs145323240	T	C	T	C	0.57	-0.1152	0.032991	0.05	FALSE	FALSE	FALSE	PwkVQx	0.0838	0.1695	3680	outcome	TRUE	reported	textfile	RPL9	3.8e-08	0.103638	exposure	TRUE	reported	V7vv2w	textfile	2	TRUE
rs1464047	T	C	T	C	-0.15	0.0517	0.39018	0.5	FALSE	FALSE	FALSE	PwkVQx	0.0298	0.08291	4524	outcome	TRUE	reported	textfile	RPSA	5.1e-08	0.0275341	exposure	TRUE	reported	V7vv2w	textfile	2	TRUE
rs147068300	A	G	A	G	0.17	-0.0455	0.028467	0.04	FALSE	FALSE	FALSE	PwkVQx	0.0818	0.5782	4168	outcome	TRUE	reported	textfile	RPS17	1.2e-05	0.0388342	exposure	TRUE	reported	V7vv2w	textfile	2	TRUE
rs148412578	A	G	A	G	0.4	-0.0645	0.013202	0.03	FALSE	FALSE	FALSE	PwkVQx	0.1415	0.6487	3322	outcome	TRUE	reported	textfile	RPL12	2.6e-07	0.0776646	exposure	TRUE	reported	V7vv2w	textfile	2	TRUE
rs150636280	A	C	A	C	0.49	-0.0374	0.011146	0.02	FALSE	FALSE	FALSE	PwkVQx	0.1484	0.8008	3322	outcome	TRUE	reported	textfile	RPL26L1	1.6e-05	0.113572	exposure	TRUE	reported	V7vv2w	textfile	2	TRUE
rs150823486	A	G	A	G	-0.57	0.0734	0.045469	0.06	FALSE	FALSE	FALSE	PwkVQx	0.1047	0.4834	3457	outcome	TRUE	reported	textfile	RPS26	1.7e-05	0.132526	exposure	TRUE	reported	V7vv2w	textfile	2	TRUE
rs151080330	T	C	T	C	0.25	0.0889	0.013076	0.03	FALSE	FALSE	FALSE	PwkVQx	0.1128	0.4305	3322	outcome	TRUE	reported	textfile	RPL36	4e-05	0.0608646	exposure	TRUE	reported	V7vv2w	textfile	2	TRUE
rs1560663	A	G	A	G	-0.082	0.0242	0.409347	0.43	FALSE	FALSE	FALSE	PwkVQx	0.039	0.5351	4154	outcome	TRUE	reported	textfile	RPS14	2.2e-05	0.0193234	exposure	TRUE	reported	V7vv2w	textfile	2	TRUE
rs16832210	G	A	G	A	-0.22	-0.0192	0.10612	0.12	FALSE	FALSE	FALSE	PwkVQx	0.0507	0.7051	4154	outcome	TRUE	reported	textfile	RPS8	5.8e-23	0.022297	exposure	TRUE	reported	V7vv2w	textfile	2	TRUE
rs16933823	A	G	A	G	0.14	0.007	0.1933	0.23	FALSE	FALSE	FALSE	PwkVQx	0.0366	0.848	4524	outcome	TRUE	reported	textfile	RPS13	2.2e-09	0.0234023	exposure	TRUE	reported	V7vv2w	textfile	2	TRUE
rs16933829	C	T	C	T	0.6	0.0302	0.057219	0.03	FALSE	FALSE	FALSE	PwkVQx	0.1187	0.7992	3199	outcome	TRUE	reported	textfile	RPS13	4.3e-42	0.0441346	exposure	TRUE	reported	V7vv2w	textfile	2	TRUE
rs17345965	A	G	A	G	0.33	0.1389	0.018953	0.02	FALSE	FALSE	FALSE	PwkVQx	0.1535	0.3654	2902	outcome	TRUE	reported	textfile	RPS20	9.9e-06	0.0746717	exposure	TRUE	reported	V7vv2w	textfile	2	TRUE
rs17555056	G	C	G	C	-0.29	-0.0231	0.204714	0.11	FALSE	TRUE	FALSE	PwkVQx	0.0497	0.6417	4524	outcome	TRUE	reported	textfile	RPS11	7.5e-25	0.0281718	exposure	TRUE	reported	V7vv2w	textfile	2	TRUE
rs17700376	G	A	G	A	-0.21	0.0228	0.296294	0.36	FALSE	FALSE	FALSE	PwkVQx	0.031	0.4617	4524	outcome	TRUE	reported	textfile	RPL28	1.9e-28	0.0189825	exposure	TRUE	reported	V7vv2w	textfile	2	TRUE
rs17841903	T	G	T	G	-0.12	0.0138	0.29541	0.26	FALSE	FALSE	FALSE	PwkVQx	0.059	0.8149	3215	outcome	TRUE	reported	textfile	RPS9	1.9e-05	0.0280615	exposure	TRUE	reported	V7vv2w	textfile	2	TRUE
rs1860236	C	A	C	A	-0.11	-0.0648	0.244209	0.15	FALSE	FALSE	FALSE	PwkVQx	0.0497	0.1927	4154	outcome	TRUE	reported	textfile	RPS2	8.2e-07	0.0223099	exposure	TRUE	reported	V7vv2w	textfile	2	TRUE
rs186655261	T	C	T	C	0.53	0.294	0.04808	0.03	FALSE	FALSE	FALSE	PwkVQx	0.1463	0.0445	3322	outcome	TRUE	reported	textfile	RPL9	3.1e-07	0.103571	exposure	TRUE	reported	V7vv2w	textfile	2	TRUE
rs1948879	G	A	G	A	0.1	-0.0232	0.336364	0.74	FALSE	FALSE	FALSE	PwkVQx	0.0347	0.5038	4524	outcome	TRUE	reported	textfile	RPL29	8.9e-08	0.0186991	exposure	TRUE	reported	V7vv2w	textfile	2	TRUE
rs1949737	G	A	G	A	0.088	-0.0108	0.49831	0.58	FALSE	FALSE	FALSE	PwkVQx	0.0309	0.7269	4524	outcome	TRUE	reported	textfile	RPS24	5.2e-05	0.0217475	exposure	TRUE	reported	V7vv2w	textfile	2	TRUE
rs1957977	G	A	G	A	0.55	-0.0196	0.307056	0.76	FALSE	FALSE	FALSE	PwkVQx	0.0355	0.5803	4524	outcome	TRUE	reported	textfile	RPL36AL	2.2e-83	0.0284296	exposure	TRUE	reported	V7vv2w	textfile	2	TRUE
rs1963311	T	C	T	C	0.17	0.003	0.131303	0.14	FALSE	FALSE	FALSE	PwkVQx	0.0463	0.9485	4524	outcome	TRUE	reported	textfile	RPS23	1e-05	0.0384861	exposure	TRUE	reported	V7vv2w	textfile	2	TRUE
rs2069414	A	C	A	C	-0.55	-0.0588	0.041972	0.06	FALSE	FALSE	FALSE	PwkVQx	0.0667	0.3781	4303	outcome	TRUE	reported	textfile	RPS26	5.3e-05	0.136072	exposure	TRUE	reported	V7vv2w	textfile	2	TRUE
rs2076172	T	C	T	C	-0.23	-0.039	0.439082	0.53	FALSE	FALSE	FALSE	PwkVQx	0.0307	0.2044	4524	outcome	TRUE	reported	textfile	RPL10A	1.6e-34	0.0187695	exposure	TRUE	reported	V7vv2w	textfile	2	TRUE
rs210157	T	C	T	C	-0.13	-0.0117	0.391636	0.35	FALSE	FALSE	FALSE	PwkVQx	0.0313	0.7094	4524	outcome	TRUE	reported	textfile	RPS18	1.8e-06	0.027227	exposure	TRUE	reported	V7vv2w	textfile	2	TRUE
rs2214285	T	C	T	C	0.14	0.0417	0.161458	0.07	FALSE	FALSE	FALSE	PwkVQx	0.0595	0.4833	4303	outcome	TRUE	reported	textfile	RPS13	9.1e-05	0.0357744	exposure	TRUE	reported	V7vv2w	textfile	2	TRUE
rs2247322	A	T	A	T	0.33	0.0007	0.378386	0.42	FALSE	TRUE	FALSE	PwkVQx	0.0305	0.9814	4524	outcome	TRUE	reported	textfile	RPL12	2.8e-69	0.0187577	exposure	TRUE	reported	V7vv2w	textfile	2	TRUE
rs2257055	C	A	C	A	0.1	0.0096	0.388318	0.5	FALSE	FALSE	FALSE	PwkVQx	0.0306	0.7526	4524	outcome	TRUE	reported	textfile	RPL12	6.7e-06	0.0222074	exposure	TRUE	reported	V7vv2w	textfile	2	TRUE
rs2286049	G	T	G	T	0.11	-0.0811	0.335663	0.19	FALSE	FALSE	FALSE	PwkVQx	0.0406	0.04596	4524	outcome	TRUE	reported	textfile	RPLP0	6.6e-06	0.0244108	exposure	TRUE	reported	V7vv2w	textfile	2	TRUE
rs2286466	G	A	G	A	-0.14	-0.0554	0.126148	0.8	FALSE	FALSE	FALSE	PwkVQx	0.0477	0.245	2750	outcome	TRUE	reported	textfile	RPS2	4.3e-11	0.0212335	exposure	TRUE	reported	V7vv2w	textfile	2	TRUE
rs2305119	T	C	T	C	0.078	0.0726	0.328121	0.23	FALSE	FALSE	FALSE	PwkVQx	0.0363	0.04583	4524	outcome	TRUE	reported	textfile	RPS5	0.00016	0.0206622	exposure	TRUE	reported	V7vv2w	textfile	2	TRUE
rs2608822	T	C	T	C	-0.55	0.0076	0.096846	0.94	FALSE	FALSE	FALSE	PwkVQx	0.0664	0.9089	4303	outcome	TRUE	reported	textfile	RPL9	3.6e-12	0.0791133	exposure	TRUE	reported	V7vv2w	textfile	2	TRUE
rs2608841	G	A	G	A	-0.32	-0.0495	0.136599	0.18	FALSE	FALSE	FALSE	PwkVQx	0.0398	0.2133	4524	outcome	TRUE	reported	textfile	RPL9	6e-08	0.0590536	exposure	TRUE	reported	V7vv2w	textfile	2	TRUE
rs2669850	C	G	C	G	-0.11	0.0227	0.452737	0.46	FALSE	TRUE	TRUE	PwkVQx	0.0326	0.4856	4154	outcome	TRUE	reported	textfile	RPSA	1.2e-05	0.025128	exposure	TRUE	reported	V7vv2w	textfile	2	FALSE
rs2687967	A	G	A	G	-0.8	0.041	0.351855	0.71	FALSE	FALSE	FALSE	PwkVQx	0.0328	0.2119	4524	outcome	TRUE	reported	textfile	RPL9	1.1e-153	0.0302935	exposure	TRUE	reported	V7vv2w	textfile	2	TRUE
rs2748244	T	A	T	A	-0.16	0.0129	0.457577	0.3	FALSE	TRUE	TRUE	PwkVQx	0.035	0.7128	4154	outcome	TRUE	reported	textfile	RPS14	9.4e-14	0.0214792	exposure	TRUE	reported	V7vv2w	textfile	2	FALSE
rs2770995	G	C	G	C	-0.14	0.0111	0.151982	0.04	FALSE	TRUE	FALSE	PwkVQx	0.0991	0.9108	3680	outcome	TRUE	reported	textfile	RACK1	6.5e-05	0.0350536	exposure	TRUE	reported	V7vv2w	textfile	2	TRUE
rs2776479	G	A	G	A	-0.15	-0.008	0.384192	0.38	FALSE	FALSE	FALSE	PwkVQx	0.0315	0.799	4524	outcome	TRUE	reported	textfile	RPL36AL	2.5e-06	0.0318598	exposure	TRUE	reported	V7vv2w	textfile	2	TRUE
rs2818827	G	A	G	A	0.19	-0.0354	0.483285	0.59	FALSE	FALSE	FALSE	PwkVQx	0.031	0.2539	4524	outcome	TRUE	reported	textfile	RPS24	9.7e-22	0.0198329	exposure	TRUE	reported	V7vv2w	textfile	2	TRUE
rs28451415	G	A	G	A	-0.24	-0.0317	0.301689	0.58	FALSE	FALSE	FALSE	PwkVQx	0.0311	0.3086	4524	outcome	TRUE	reported	textfile	UBA52	5.7e-35	0.0194531	exposure	TRUE	reported	V7vv2w	textfile	2	TRUE
rs28593016	T	C	T	C	-0.27	-0.0148	0.172125	0.05	FALSE	FALSE	FALSE	PwkVQx	0.0763	0.8462	4050	outcome	TRUE	reported	textfile	RPS3A	4.7e-11	0.0410326	exposure	TRUE	reported	V7vv2w	textfile	2	TRUE
rs28710291	A	G	A	G	0.1	-0.024	0.324969	0.61	FALSE	FALSE	FALSE	PwkVQx	0.0322	0.4564	4524	outcome	TRUE	reported	textfile	RPLP2	5.6e-11	0.0152578	exposure	TRUE	reported	V7vv2w	textfile	2	TRUE
rs2879532	G	A	G	A	-0.13	-0.0388	0.453924	0.5	FALSE	FALSE	FALSE	PwkVQx	0.0338	0.2502	4154	outcome	TRUE	reported	textfile	RPL26L1	1.3e-05	0.0298158	exposure	TRUE	reported	V7vv2w	textfile	2	TRUE
rs2954658	T	C	T	C	-0.3	-0.0187	0.422902	0.51	FALSE	FALSE	FALSE	PwkVQx	0.0329	0.5703	4154	outcome	TRUE	reported	textfile	RPL8	3.3e-64	0.0177323	exposure	TRUE	reported	V7vv2w	textfile	2	TRUE
rs2983715	A	G	A	G	0.081	0.0291	0.272457	0.23	FALSE	FALSE	FALSE	PwkVQx	0.0374	0.4355	4524	outcome	TRUE	reported	textfile	RPS8	5.1e-06	0.0177607	exposure	TRUE	reported	V7vv2w	textfile	2	TRUE
rs3087546	T	C	T	C	0.075	0.004	0.459597	0.57	FALSE	FALSE	FALSE	PwkVQx	0.0328	0.9036	4524	outcome	TRUE	reported	textfile	RPLP2	1e-06	0.0153323	exposure	TRUE	reported	V7vv2w	textfile	2	TRUE
rs3133186	C	T	C	T	-0.35	0.0676	0.071802	0.07	FALSE	FALSE	FALSE	PwkVQx	0.0613	0.2705	4303	outcome	TRUE	reported	textfile	RPS3	2.6e-28	0.0317182	exposure	TRUE	reported	V7vv2w	textfile	2	TRUE
rs323864	C	T	C	T	-0.29	-0.3003	0.10675	0.02	FALSE	FALSE	FALSE	PwkVQx	0.1404	0.03246	3692	outcome	TRUE	reported	textfile	RPL29	4.5e-15	0.0369891	exposure	TRUE	reported	V7vv2w	textfile	2	TRUE
rs323881	C	T	C	T	-0.16	0.016	0.140567	0.07	FALSE	FALSE	FALSE	PwkVQx	0.0622	0.7976	4303	outcome	TRUE	reported	textfile	RPL29	1.3e-07	0.0303097	exposure	TRUE	reported	V7vv2w	textfile	2	TRUE
rs338786	T	C	T	C	0.17	-0.0221	0.098091	0.12	FALSE	FALSE	FALSE	PwkVQx	0.0562	0.694	3375	outcome	TRUE	reported	textfile	RPS2	1.2e-09	0.0279594	exposure	TRUE	reported	V7vv2w	textfile	2	TRUE
rs34071094	G	C	G	C	-0.19	-0.103	0.072955	0.08	FALSE	TRUE	FALSE	PwkVQx	0.0592	0.08185	4524	outcome	TRUE	reported	textfile	UBA52	5.3e-08	0.0349204	exposure	TRUE	reported	V7vv2w	textfile	2	TRUE
rs34659643	C	T	C	T	0.18	0.0837	0.211729	0.14	FALSE	FALSE	FALSE	PwkVQx	0.0431	0.05179	4524	outcome	TRUE	reported	textfile	RPS23	2.7e-07	0.0349972	exposure	TRUE	reported	V7vv2w	textfile	2	TRUE
rs35009020	C	G	C	G	0.11	-0.0064	0.320794	0.41	FALSE	TRUE	FALSE	PwkVQx	0.0348	0.8548	4154	outcome	TRUE	reported	textfile	RPS19	7.7e-07	0.0222545	exposure	TRUE	reported	V7vv2w	textfile	2	TRUE
rs35373018	C	T	C	T	-0.13	0.0965	0.058951	0.08	FALSE	FALSE	FALSE	PwkVQx	0.0891	0.2788	2861	outcome	TRUE	reported	textfile	RPL14	7.8e-05	0.0329075	exposure	TRUE	reported	V7vv2w	textfile	2	TRUE
rs3738	C	A	C	A	-0.44	-0.0055	0.32623	0.32	FALSE	FALSE	FALSE	PwkVQx	0.0321	0.8642	4524	outcome	TRUE	reported	textfile	RPS23	9.3e-75	0.0240521	exposure	TRUE	reported	V7vv2w	textfile	2	TRUE
rs3772143	G	T	G	T	-0.35	0.0092	0.491733	0.52	FALSE	FALSE	FALSE	PwkVQx	0.0302	0.7612	4524	outcome	TRUE	reported	textfile	RPSA	1.3e-56	0.0220752	exposure	TRUE	reported	V7vv2w	textfile	2	TRUE
rs3772145	T	C	T	C	-0.3	-0.0412	0.054076	0.03	FALSE	FALSE	FALSE	PwkVQx	0.1059	0.6969	3915	outcome	TRUE	reported	textfile	RPSA	4.8e-05	0.0737979	exposure	TRUE	reported	V7vv2w	textfile	2	TRUE
rs3810232	C	A	C	A	-0.32	0.0331	0.297459	0.37	FALSE	FALSE	FALSE	PwkVQx	0.0312	0.2897	4524	outcome	TRUE	reported	textfile	RPS9	1.3e-45	0.0225742	exposure	TRUE	reported	V7vv2w	textfile	2	TRUE
rs3935304	G	A	G	A	0.32	-0.025	0.144612	0.11	FALSE	FALSE	FALSE	PwkVQx	0.0489	0.6092	4524	outcome	TRUE	reported	textfile	RPL12	3.8e-19	0.0357836	exposure	TRUE	reported	V7vv2w	textfile	2	TRUE
rs41270113	T	A	T	A	0.21	0.0462	0.061308	0.08	FALSE	TRUE	FALSE	PwkVQx	0.063	0.463	4303	outcome	TRUE	reported	textfile	RPS6	6.7e-07	0.0422547	exposure	TRUE	reported	V7vv2w	textfile	2	TRUE
rs4252561	C	G	C	G	-0.11	0.035	0.263435	0.31	FALSE	TRUE	FALSE	PwkVQx	0.0348	0.3149	4524	outcome	TRUE	reported	textfile	RPL28	1.8e-08	0.0195375	exposure	TRUE	reported	V7vv2w	textfile	2	TRUE
rs4330728	A	G	A	G	-0.083	-0.0259	0.382275	0.46	FALSE	FALSE	FALSE	PwkVQx	0.0359	0.47	4154	outcome	TRUE	reported	textfile	RPL8	4.5e-05	0.0203422	exposure	TRUE	reported	V7vv2w	textfile	2	TRUE
rs4337589	A	G	A	G	-0.088	-0.0093	0.418202	0.47	FALSE	FALSE	FALSE	PwkVQx	0.0303	0.7593	4524	outcome	TRUE	reported	textfile	RPL14	1.5e-05	0.0203295	exposure	TRUE	reported	V7vv2w	textfile	2	TRUE
rs434755	C	T	C	T	0.11	-0.0168	0.7132	0.3	FALSE	FALSE	FALSE	PwkVQx	0.0374	0.6532	4154	outcome	TRUE	reported	textfile	RPS9	5.9e-06	0.0242829	exposure	TRUE	reported	V7vv2w	textfile	2	TRUE
rs4386433	G	A	G	A	0.29	-0.0045	0.035444	0.06	FALSE	FALSE	FALSE	PwkVQx	0.0686	0.9475	4303	outcome	TRUE	reported	textfile	RPSA	1.2e-05	0.0662465	exposure	TRUE	reported	V7vv2w	textfile	2	TRUE
rs4417323	G	C	G	C	0.39	0.0856	0.188984	0.25	FALSE	TRUE	FALSE	PwkVQx	0.0495	0.08355	4000	outcome	TRUE	reported	textfile	RPS26	5.3e-08	0.0716788	exposure	TRUE	reported	V7vv2w	textfile	2	TRUE
rs45583031	T	C	T	C	0.19	0.092	0.04566	0.06	FALSE	FALSE	FALSE	PwkVQx	0.0695	0.1859	4303	outcome	TRUE	reported	textfile	RPL36	5e-07	0.0378011	exposure	TRUE	reported	V7vv2w	textfile	2	TRUE
rs45589231	G	C	G	C	-0.47	0.1338	0.024811	0.03	FALSE	TRUE	FALSE	PwkVQx	0.1213	0.27	3322	outcome	TRUE	reported	textfile	RPL36AL	2.2e-08	0.0839962	exposure	TRUE	reported	V7vv2w	textfile	2	TRUE
rs4785577	A	G	A	G	0.099	-0.0433	0.207788	0.3	FALSE	FALSE	FALSE	PwkVQx	0.0405	0.2851	4154	outcome	TRUE	reported	textfile	RPL13	5.8e-05	0.0246219	exposure	TRUE	reported	V7vv2w	textfile	2	TRUE
rs4807781	A	G	A	G	-0.4	0.0336	0.01866	0.02	FALSE	FALSE	FALSE	PwkVQx	0.1237	0.7863	3692	outcome	TRUE	reported	textfile	RPL36	1.1e-08	0.0699969	exposure	TRUE	reported	V7vv2w	textfile	2	TRUE
rs4925813	G	A	G	A	-0.12	-0.0346	0.298591	0.61	FALSE	FALSE	FALSE	PwkVQx	0.0306	0.2589	4524	outcome	TRUE	reported	textfile	RPL8	2.4e-08	0.0215039	exposure	TRUE	reported	V7vv2w	textfile	2	TRUE
rs536262	T	C	T	C	-0.15	-0.0572	0.168498	0.1	FALSE	FALSE	FALSE	PwkVQx	0.0512	0.2641	4524	outcome	TRUE	reported	textfile	RPL12	1.7e-05	0.0348753	exposure	TRUE	reported	V7vv2w	textfile	2	TRUE
rs55836769	G	T	G	T	-0.15	0.0542	0.099463	0.14	FALSE	FALSE	FALSE	PwkVQx	0.0495	0.2736	4154	outcome	TRUE	reported	textfile	RPL8	2.4e-06	0.0318036	exposure	TRUE	reported	V7vv2w	textfile	2	TRUE
rs57317131	C	G	C	G	-0.16	0.0012	0.32294	0.37	FALSE	TRUE	FALSE	PwkVQx	0.0496	0.9799	3879	outcome	TRUE	reported	textfile	RPS9	2e-09	0.0266764	exposure	TRUE	reported	V7vv2w	textfile	2	TRUE
rs58971671	A	G	A	G	0.47	0.03	0.122632	0.04	FALSE	FALSE	FALSE	PwkVQx	0.0889	0.7354	3915	outcome	TRUE	reported	textfile	RPL9	2.8e-08	0.0846313	exposure	TRUE	reported	V7vv2w	textfile	2	TRUE
rs606851	G	A	G	A	0.11	-0.0198	0.294	0.7	FALSE	FALSE	FALSE	PwkVQx	0.0418	0.6363	4033	outcome	TRUE	reported	textfile	RPS9	2.7e-05	0.0262067	exposure	TRUE	reported	V7vv2w	textfile	2	TRUE
rs61875926	G	C	G	C	-0.15	0.0265	0.08157	0.1	FALSE	TRUE	FALSE	PwkVQx	0.0613	0.666	4000	outcome	TRUE	reported	textfile	RPL27A	3.1e-08	0.0270969	exposure	TRUE	reported	V7vv2w	textfile	2	TRUE
rs61892856	A	G	A	G	-0.31	0.2186	0.009525	0.02	FALSE	FALSE	FALSE	PwkVQx	0.1485	0.141	3322	outcome	TRUE	reported	textfile	RPS3	6.9e-05	0.0778952	exposure	TRUE	reported	V7vv2w	textfile	2	TRUE
rs61937675	G	C	G	C	0.55	0.0412	0.099719	0.15	FALSE	TRUE	FALSE	PwkVQx	0.0597	0.4904	4000	outcome	TRUE	reported	textfile	RPS26	1.2e-12	0.0774062	exposure	TRUE	reported	V7vv2w	textfile	2	TRUE
rs61939013	C	T	C	T	0.71	0.1957	0.026591	0.03	FALSE	FALSE	FALSE	PwkVQx	0.1711	0.2527	2371	outcome	TRUE	reported	textfile	RPS26	4.5e-07	0.140692	exposure	TRUE	reported	V7vv2w	textfile	2	TRUE
rs62011974	T	C	T	C	-0.17	0.0243	0.03207	0.05	FALSE	FALSE	FALSE	PwkVQx	0.0809	0.764	3812	outcome	TRUE	reported	textfile	RPS17	6.1e-06	0.0375866	exposure	TRUE	reported	V7vv2w	textfile	2	TRUE
rs62106034	A	C	A	C	-0.25	0.0046	0.059305	0.06	FALSE	FALSE	FALSE	PwkVQx	0.0833	0.9559	3680	outcome	TRUE	reported	textfile	RPS7	8.2e-10	0.0407099	exposure	TRUE	reported	V7vv2w	textfile	2	TRUE
rs62242640	T	C	T	C	0.3	0.0094	0.057084	0.04	FALSE	FALSE	FALSE	PwkVQx	0.1233	0.9394	3322	outcome	TRUE	reported	textfile	RPSA	2.7e-05	0.0714729	exposure	TRUE	reported	V7vv2w	textfile	2	TRUE
rs6421968	T	G	T	G	0.072	-0.0154	0.332961	0.25	FALSE	FALSE	FALSE	PwkVQx	0.0415	0.7106	4154	outcome	TRUE	reported	textfile	RPLP2	5.9e-05	0.0179248	exposure	TRUE	reported	V7vv2w	textfile	2	TRUE
rs6511006	A	C	A	C	-0.086	-0.014	0.266058	0.66	FALSE	FALSE	FALSE	PwkVQx	0.0384	0.7153	4154	outcome	TRUE	reported	textfile	UBA52	4.1e-05	0.0209666	exposure	TRUE	reported	V7vv2w	textfile	2	TRUE
rs651601	C	T	C	T	0.096	0.0078	0.454519	0.34	FALSE	FALSE	FALSE	PwkVQx	0.0317	0.8061	4524	outcome	TRUE	reported	textfile	RPS16	1.4e-11	0.0142056	exposure	TRUE	reported	V7vv2w	textfile	2	TRUE
rs6572611	G	A	G	A	0.21	-0.0234	0.154254	0.18	FALSE	FALSE	FALSE	PwkVQx	0.0517	0.6505	3879	outcome	TRUE	reported	textfile	RPL36AL	5.8e-08	0.0387107	exposure	TRUE	reported	V7vv2w	textfile	2	TRUE
rs6572634	A	C	A	C	0.14	-0.0427	0.462776	0.46	FALSE	FALSE	FALSE	PwkVQx	0.0323	0.1861	4154	outcome	TRUE	reported	textfile	RPL36AL	8.7e-06	0.0314805	exposure	TRUE	reported	V7vv2w	textfile	2	TRUE
rs6572642	G	A	G	A	-0.16	0.0412	0.165104	0.84	FALSE	FALSE	FALSE	PwkVQx	0.042	0.3267	4524	outcome	TRUE	reported	textfile	RPL36AL	6.6e-05	0.0400976	exposure	TRUE	reported	V7vv2w	textfile	2	TRUE
rs6823497	A	C	A	C	-0.17	0.0007	0.486621	0.52	FALSE	FALSE	FALSE	PwkVQx	0.0303	0.9817	4524	outcome	TRUE	reported	textfile	RPL9	3e-05	0.0407335	exposure	TRUE	reported	V7vv2w	textfile	2	TRUE
rs686657	A	G	A	G	0.18	-0.0024	0.409648	0.58	FALSE	FALSE	FALSE	PwkVQx	0.0301	0.9358	4524	outcome	TRUE	reported	textfile	RPS23	7e-12	0.026248	exposure	TRUE	reported	V7vv2w	textfile	2	TRUE
rs6904716	G	A	G	A	-0.11	0.0346	0.448657	0.44	FALSE	FALSE	FALSE	PwkVQx	0.0299	0.247	4524	outcome	TRUE	reported	textfile	RPS18	1.1e-05	0.0250198	exposure	TRUE	reported	V7vv2w	textfile	2	TRUE
rs6925243	G	A	G	A	0.21	0.0083	0.221424	0.1	FALSE	FALSE	FALSE	PwkVQx	0.0525	0.874	4524	outcome	TRUE	reported	textfile	RPS10	8.7e-14	0.0281529	exposure	TRUE	reported	V7vv2w	textfile	2	TRUE
rs6936419	A	C	A	C	-0.066	-0.0121	0.377537	0.49	FALSE	FALSE	FALSE	PwkVQx	0.0304	0.6897	4524	outcome	TRUE	reported	textfile	RPS10	0.00014	0.0173312	exposure	TRUE	reported	V7vv2w	textfile	2	TRUE
rs7035698	G	A	G	A	0.16	-0.0178	0.113164	0.15	FALSE	FALSE	FALSE	PwkVQx	0.0472	0.7067	4154	outcome	TRUE	reported	textfile	RPL12	5.4e-06	0.0351755	exposure	TRUE	reported	V7vv2w	textfile	2	TRUE
rs7040019	A	G	A	G	0.15	-0.0305	0.49654	0.52	FALSE	FALSE	FALSE	PwkVQx	0.0353	0.3881	4154	outcome	TRUE	reported	textfile	RPL12	2.6e-10	0.0237307	exposure	TRUE	reported	V7vv2w	textfile	2	TRUE
rs71497661	T	C	T	C	-0.18	0.1347	0.077107	0.13	FALSE	FALSE	FALSE	PwkVQx	0.0554	0.01501	4000	outcome	TRUE	reported	textfile	RPL12	7.7e-08	0.0334945	exposure	TRUE	reported	V7vv2w	textfile	2	TRUE
rs71522403	G	C	G	C	0.2	0.0704	0.086265	0.13	FALSE	TRUE	FALSE	PwkVQx	0.0632	0.2656	3879	outcome	TRUE	reported	textfile	RPL8	3.5e-11	0.030194	exposure	TRUE	reported	V7vv2w	textfile	2	TRUE
rs71522414	A	C	A	C	-0.1	-0.0805	0.2456	0.15	FALSE	FALSE	FALSE	PwkVQx	0.0599	0.1786	4000	outcome	TRUE	reported	textfile	RPL8	0.00011	0.0258571	exposure	TRUE	reported	V7vv2w	textfile	2	TRUE
rs7248357	C	T	C	T	0.085	-0.0032	0.4183	0.44	FALSE	FALSE	FALSE	PwkVQx	0.0356	0.9295	4154	outcome	TRUE	reported	textfile	RPS5	7.2e-06	0.0189407	exposure	TRUE	reported	V7vv2w	textfile	2	TRUE
rs72680061	G	A	G	A	0.19	-0.0351	0.152357	0.19	FALSE	FALSE	FALSE	PwkVQx	0.0455	0.4401	4154	outcome	TRUE	reported	textfile	RPL36AL	1.7e-07	0.0363326	exposure	TRUE	reported	V7vv2w	textfile	2	TRUE
rs72699315	G	A	G	A	-0.16	-0.0116	0.068173	0.1	FALSE	FALSE	FALSE	PwkVQx	0.0637	0.8552	4000	outcome	TRUE	reported	textfile	RPL8	2e-06	0.0336599	exposure	TRUE	reported	V7vv2w	textfile	2	TRUE
rs72751675	C	A	C	A	0.1	-0.0203	0.081669	0.2	FALSE	FALSE	FALSE	PwkVQx	0.0372	0.5857	4524	outcome	TRUE	reported	textfile	RPS17	3.2e-07	0.0195646	exposure	TRUE	reported	V7vv2w	textfile	2	TRUE
rs72847445	G	A	G	A	-0.29	0.0691	0.020677	0.03	FALSE	FALSE	FALSE	PwkVQx	0.0988	0.4842	3915	outcome	TRUE	reported	textfile	RPL27A	8.1e-05	0.0735775	exposure	TRUE	reported	V7vv2w	textfile	2	TRUE
rs72896138	A	G	A	G	-0.5	0.0113	0.01689	0.03	FALSE	FALSE	FALSE	PwkVQx	0.1059	0.9149	3915	outcome	TRUE	reported	textfile	RPS18	1.3e-09	0.0824077	exposure	TRUE	reported	V7vv2w	textfile	2	TRUE
rs72964039	G	C	G	C	-0.18	0.0327	0.121195	0.03	FALSE	TRUE	FALSE	PwkVQx	0.1278	0.7981	3199	outcome	TRUE	reported	textfile	RPL29	6.9e-06	0.0400289	exposure	TRUE	reported	V7vv2w	textfile	2	TRUE
rs730264	G	A	G	A	-0.25	-0.0175	0.191682	0.2	FALSE	FALSE	FALSE	PwkVQx	0.0381	0.6466	4524	outcome	TRUE	reported	textfile	RPL13	4.5e-24	0.0247033	exposure	TRUE	reported	V7vv2w	textfile	2	TRUE
rs73072968	T	C	T	C	-0.2	-0.0157	0.015316	0.03	FALSE	FALSE	FALSE	PwkVQx	0.1071	0.8833	3545	outcome	TRUE	reported	textfile	RPL29	0.00017	0.0531933	exposure	TRUE	reported	V7vv2w	textfile	2	TRUE
rs731835	C	T	C	T	-0.18	-0.0016	0.33096	0.34	FALSE	FALSE	FALSE	PwkVQx	0.0328	0.9599	4524	outcome	TRUE	reported	textfile	RPS5	1.5e-25	0.0172285	exposure	TRUE	reported	V7vv2w	textfile	2	TRUE
rs73240613	G	T	G	T	0.44	0.11	0.020772	0.04	FALSE	FALSE	FALSE	PwkVQx	0.0935	0.2394	3915	outcome	TRUE	reported	textfile	RPL9	2.2e-05	0.103686	exposure	TRUE	reported	V7vv2w	textfile	2	TRUE
rs74391990	G	C	G	C	-0.17	-0.1362	0.045145	0.02	FALSE	TRUE	FALSE	PwkVQx	0.1431	0.3411	2829	outcome	TRUE	reported	textfile	RPS2	4e-05	0.0413879	exposure	TRUE	reported	V7vv2w	textfile	2	TRUE
rs74413342	A	C	A	C	-0.29	-0.0068	0.093762	0.09	FALSE	FALSE	FALSE	PwkVQx	0.0523	0.8967	4524	outcome	TRUE	reported	textfile	RPSA	1.3e-10	0.0451209	exposure	TRUE	reported	V7vv2w	textfile	2	TRUE
rs74711338	A	G	A	G	0.17	0.0456	0.236045	0.31	FALSE	FALSE	FALSE	PwkVQx	0.0427	0.2854	4033	outcome	TRUE	reported	textfile	RPL36AL	6.3e-07	0.0341243	exposure	TRUE	reported	V7vv2w	textfile	2	TRUE
rs7484027	A	T	A	T	0.09	-0.0171	0.457344	0.44	FALSE	TRUE	TRUE	PwkVQx	0.0304	0.574	4524	outcome	TRUE	reported	textfile	RPS13	7.1e-06	0.0200416	exposure	TRUE	reported	V7vv2w	textfile	2	FALSE
rs7484392	C	T	C	T	-0.67	-0.0693	0.048611	0.05	FALSE	FALSE	FALSE	PwkVQx	0.1298	0.5932	2594	outcome	TRUE	reported	textfile	RPS26	2.3e-06	0.141796	exposure	TRUE	reported	V7vv2w	textfile	2	TRUE
rs75279419	G	A	G	A	-0.12	0.0764	0.096215	0.12	FALSE	FALSE	FALSE	PwkVQx	0.0528	0.1477	4154	outcome	TRUE	reported	textfile	RPL3	1.7e-05	0.0279002	exposure	TRUE	reported	V7vv2w	textfile	2	TRUE
rs75331044	C	T	C	T	0.26	0.0698	0.096412	0.14	FALSE	FALSE	FALSE	PwkVQx	0.0493	0.157	4154	outcome	TRUE	reported	textfile	RPL9	1.4e-05	0.0598546	exposure	TRUE	reported	V7vv2w	textfile	2	TRUE
rs75402468	T	C	T	C	-0.23	0.2704	0.057792	0.02	FALSE	FALSE	FALSE	PwkVQx	0.1213	0.02582	3692	outcome	TRUE	reported	textfile	RPS24	5.4e-07	0.0458942	exposure	TRUE	reported	V7vv2w	textfile	2	TRUE
rs75679752	A	G	A	G	0.16	-0.0463	0.094182	0.13	FALSE	FALSE	FALSE	PwkVQx	0.0454	0.3074	4524	outcome	TRUE	reported	textfile	RPS23	9.6e-05	0.0410205	exposure	TRUE	reported	V7vv2w	textfile	2	TRUE
rs76092567	A	G	A	G	-0.13	0.0205	0.092009	0.11	FALSE	FALSE	FALSE	PwkVQx	0.0598	0.7316	4000	outcome	TRUE	reported	textfile	UBA52	3.7e-05	0.0315117	exposure	TRUE	reported	V7vv2w	textfile	2	TRUE
rs76132381	T	C	T	C	-0.21	0.1298	0.009748	0.01	FALSE	FALSE	FALSE	PwkVQx	0.1668	0.4364	3322	outcome	TRUE	reported	textfile	RPS8	0.00013	0.054881	exposure	TRUE	reported	V7vv2w	textfile	2	TRUE
rs76184771	G	A	G	A	0.12	0.0716	0.154593	0.13	FALSE	FALSE	FALSE	PwkVQx	0.0458	0.1175	4524	outcome	TRUE	reported	textfile	UBA52	3.4e-05	0.0289514	exposure	TRUE	reported	V7vv2w	textfile	2	TRUE
rs76445127	A	G	A	G	-0.26	0.0934	0.0284	0.03	FALSE	FALSE	FALSE	PwkVQx	0.0977	0.3392	3692	outcome	TRUE	reported	textfile	RPL28	2e-06	0.0546974	exposure	TRUE	reported	V7vv2w	textfile	2	TRUE
rs76664897	T	C	T	C	0.29	0.0414	0.04399	0.04	FALSE	FALSE	FALSE	PwkVQx	0.097	0.6692	3915	outcome	TRUE	reported	textfile	RPSA	5.8e-06	0.0639675	exposure	TRUE	reported	V7vv2w	textfile	2	TRUE
rs76690650	A	G	A	G	0.2	0.048	0.032726	0.05	FALSE	FALSE	FALSE	PwkVQx	0.0878	0.5846	3915	outcome	TRUE	reported	textfile	RPL10A	0.00018	0.0533967	exposure	TRUE	reported	V7vv2w	textfile	2	TRUE
rs77102251	G	C	G	C	-0.48	0.0909	0.044661	0.06	FALSE	TRUE	FALSE	PwkVQx	0.0815	0.2648	3666	outcome	TRUE	reported	textfile	RPL9	1.9e-05	0.112246	exposure	TRUE	reported	V7vv2w	textfile	2	TRUE
rs77110687	C	T	C	T	-0.54	0.2033	0.006473	0.02	FALSE	FALSE	FALSE	PwkVQx	0.162	0.2095	2273	outcome	TRUE	reported	textfile	RPSA	9.8e-05	0.138622	exposure	TRUE	reported	V7vv2w	textfile	2	TRUE
rs773126	A	T	A	T	0.31	-0.0248	0.369721	0.4	FALSE	TRUE	FALSE	PwkVQx	0.0417	0.5527	4154	outcome	TRUE	reported	textfile	RPS26	4.3e-07	0.0613233	exposure	TRUE	reported	V7vv2w	textfile	2	TRUE
rs77352494	G	A	G	A	0.24	0.0604	0.117393	0.13	FALSE	FALSE	FALSE	PwkVQx	0.0448	0.1775	4524	outcome	TRUE	reported	textfile	RPL9	4.3e-05	0.0586691	exposure	TRUE	reported	V7vv2w	textfile	2	TRUE
rs77657644	A	G	A	G	-0.16	-0.0922	0.049595	0.06	FALSE	FALSE	FALSE	PwkVQx	0.0699	0.1871	4171	outcome	TRUE	reported	textfile	RPS8	3e-06	0.0342552	exposure	TRUE	reported	V7vv2w	textfile	2	TRUE
rs77710836	T	C	T	C	-0.38	0.054	0.015451	0.03	FALSE	FALSE	FALSE	PwkVQx	0.1292	0.6759	3322	outcome	TRUE	reported	textfile	RPS24	4.6e-06	0.0829287	exposure	TRUE	reported	V7vv2w	textfile	2	TRUE
rs77796932	A	G	A	G	0.18	0.0529	0.015094	0.03	FALSE	FALSE	FALSE	PwkVQx	0.1084	0.6259	3692	outcome	TRUE	reported	textfile	RPS8	0.00011	0.0465428	exposure	TRUE	reported	V7vv2w	textfile	2	TRUE
rs78016521	T	C	T	C	-0.3	-0.1191	0.011372	0.02	FALSE	FALSE	FALSE	PwkVQx	0.1559	0.4447	2902	outcome	TRUE	reported	textfile	RPL13	8.4e-05	0.0762836	exposure	TRUE	reported	V7vv2w	textfile	2	TRUE
rs78454682	A	G	A	G	-0.13	-0.0647	0.092104	0.12	FALSE	FALSE	FALSE	PwkVQx	0.0484	0.181	4524	outcome	TRUE	reported	textfile	RPS10	1.5e-06	0.0270201	exposure	TRUE	reported	V7vv2w	textfile	2	TRUE
rs79269008	G	A	G	A	-0.9	-0.1283	0.023001	0.02	FALSE	FALSE	FALSE	PwkVQx	0.1366	0.3478	3322	outcome	TRUE	reported	textfile	RPS26	3.8e-06	0.19472	exposure	TRUE	reported	V7vv2w	textfile	2	TRUE
rs79592126	A	G	A	G	-0.58	0.1992	0.01517	0.02	FALSE	FALSE	FALSE	PwkVQx	0.1763	0.2584	2829	outcome	TRUE	reported	textfile	RPS18	2.5e-10	0.0916709	exposure	TRUE	reported	V7vv2w	textfile	2	TRUE
rs79594160	T	C	T	C	-0.31	-0.0608	0.022607	0.03	FALSE	FALSE	FALSE	PwkVQx	0.0988	0.5381	3545	outcome	TRUE	reported	textfile	RPS20	4.8e-08	0.0567915	exposure	TRUE	reported	V7vv2w	textfile	2	TRUE
rs803686	A	G	A	G	-0.17	-0.0505	0.260888	0.3	FALSE	FALSE	FALSE	PwkVQx	0.0329	0.1245	4524	outcome	TRUE	reported	textfile	RPS17	5.5e-22	0.0176377	exposure	TRUE	reported	V7vv2w	textfile	2	TRUE
rs9471939	T	A	T	A	-0.14	-0.015	0.204478	0.28	FALSE	TRUE	FALSE	PwkVQx	0.0341	0.66	4524	outcome	TRUE	reported	textfile	RPL7L1	8.2e-11	0.0693551	exposure	TRUE	reported	V7vv2w	textfile	2	TRUE
Liver-Longevity 90p
SNP	effect_allele.exposure	other_allele.exposure	effect_allele.outcome	other_allele.outcome	beta.exposure	beta.outcome	eaf.exposure	eaf.outcome	remove	palindromic	ambiguous	id.outcome	se.outcome	pval.outcome	samplesize.outcome	outcome	mr_keep.outcome	pval_origin.outcome	data_source.outcome	gene.exposure	pval.exposure	se.exposure	exposure	mr_keep.exposure	pval_origin.exposure	id.exposure	data_source.exposure	action	mr_keep
rs1131017	G	C	G	C	-1	0.0149	0.444089	0.42	FALSE	TRUE	TRUE	2rlfxX	0.0195	0.4468	11615	outcome	TRUE	reported	textfile	RPS26	1.8e-59	0.0614884	exposure	TRUE	reported	y3b2jJ	textfile	2	FALSE
rs11684944	C	T	C	T	0.21	-0.0066	0.415583	0.37	FALSE	FALSE	FALSE	2rlfxX	0.0219	0.7643	11615	outcome	TRUE	reported	textfile	RPS7	7.1e-06	0.0467636	exposure	TRUE	reported	y3b2jJ	textfile	2	TRUE
rs12103674	C	T	C	T	0.25	-0.0156	0.140237	0.08	FALSE	FALSE	FALSE	2rlfxX	0.0362	0.6661	11615	outcome	TRUE	reported	textfile	RPL19	1.2e-05	0.0571091	exposure	TRUE	reported	y3b2jJ	textfile	2	TRUE
rs12798081	A	G	A	G	-0.46	0.0487	0.066482	0.07	FALSE	FALSE	FALSE	2rlfxX	0.0394	0.2157	11615	outcome	TRUE	reported	textfile	RPS3	1.1e-06	0.0944006	exposure	TRUE	reported	y3b2jJ	textfile	2	TRUE
rs12911848	A	G	A	G	0.2	-0.0048	0.357439	0.4	FALSE	FALSE	FALSE	2rlfxX	0.0194	0.8025	11615	outcome	TRUE	reported	textfile	RPL4	3.7e-06	0.0432193	exposure	TRUE	reported	y3b2jJ	textfile	2	TRUE
rs146031396	T	C	T	C	-0.51	0.046	0.019718	0.03	FALSE	FALSE	FALSE	2rlfxX	0.0662	0.4873	11209	outcome	TRUE	reported	textfile	RPS23	4.9e-05	0.125605	exposure	TRUE	reported	y3b2jJ	textfile	2	TRUE
rs17700376	G	A	G	A	-0.37	0.0032	0.296294	0.36	FALSE	FALSE	FALSE	2rlfxX	0.0205	0.8775	11075	outcome	TRUE	reported	textfile	RPL28	3.2e-11	0.0557476	exposure	TRUE	reported	y3b2jJ	textfile	2	TRUE
rs226194	T	G	T	G	0.32	0.0066	0.307222	0.69	FALSE	FALSE	FALSE	2rlfxX	0.0208	0.7494	11615	outcome	TRUE	reported	textfile	RPS23	4.5e-12	0.0462393	exposure	TRUE	reported	y3b2jJ	textfile	2	TRUE
rs2608822	T	C	T	C	-0.63	0.0597	0.096846	0.94	FALSE	FALSE	FALSE	2rlfxX	0.0414	0.1494	11615	outcome	TRUE	reported	textfile	RPL9	7.5e-07	0.127326	exposure	TRUE	reported	y3b2jJ	textfile	2	TRUE
rs2687967	A	G	A	G	-0.71	0.0276	0.351855	0.7	FALSE	FALSE	FALSE	2rlfxX	0.0208	0.1841	11615	outcome	TRUE	reported	textfile	RPL9	1.7e-30	0.061857	exposure	TRUE	reported	y3b2jJ	textfile	2	TRUE
rs2972574	C	T	C	T	-0.41	0.0343	0.411701	0.56	FALSE	FALSE	FALSE	2rlfxX	0.02	0.08636	11075	outcome	TRUE	reported	textfile	RPS28	8.1e-16	0.0509147	exposure	TRUE	reported	y3b2jJ	textfile	2	TRUE
rs3743850	T	G	T	G	0.31	-0.0229	0.149561	0.12	FALSE	FALSE	FALSE	2rlfxX	0.0342	0.5034	9735	outcome	TRUE	reported	textfile	RPS2	1.4e-06	0.0642486	exposure	TRUE	reported	y3b2jJ	textfile	2	TRUE
rs4400487	T	C	T	C	0.26	-0.0052	0.409701	0.56	FALSE	FALSE	FALSE	2rlfxX	0.02	0.7962	11615	outcome	TRUE	reported	textfile	RPL12	1.2e-09	0.0427614	exposure	TRUE	reported	y3b2jJ	textfile	2	TRUE
rs4850068	T	C	T	C	-0.22	-0.0201	0.401926	0.67	FALSE	FALSE	FALSE	2rlfxX	0.0212	0.3435	11050	outcome	TRUE	reported	textfile	RPS7	3.5e-06	0.0474234	exposure	TRUE	reported	y3b2jJ	textfile	2	TRUE
rs56713196	G	C	G	C	-0.36	0.0294	0.13783	0.19	FALSE	TRUE	FALSE	2rlfxX	0.0264	0.2651	11615	outcome	TRUE	reported	textfile	RPSA	2.5e-09	0.0603879	exposure	TRUE	reported	y3b2jJ	textfile	2	TRUE
rs6857705	C	T	C	T	0.31	-0.0282	0.467789	0.51	FALSE	FALSE	FALSE	2rlfxX	0.0196	0.151	11615	outcome	TRUE	reported	textfile	RPL9	3.6e-06	0.0669079	exposure	TRUE	reported	y3b2jJ	textfile	2	TRUE
rs8014170	G	C	G	C	0.19	-0.03	0.286155	0.24	FALSE	TRUE	FALSE	2rlfxX	0.0227	0.1864	11615	outcome	TRUE	reported	textfile	RPL36AL	1.9e-06	0.0398843	exposure	TRUE	reported	y3b2jJ	textfile	2	TRUE
Liver-Longevity 99p
SNP	effect_allele.exposure	other_allele.exposure	effect_allele.outcome	other_allele.outcome	beta.exposure	beta.outcome	eaf.exposure	eaf.outcome	remove	palindromic	ambiguous	id.outcome	se.outcome	pval.outcome	samplesize.outcome	outcome	mr_keep.outcome	pval_origin.outcome	data_source.outcome	gene.exposure	pval.exposure	se.exposure	exposure	mr_keep.exposure	pval_origin.exposure	id.exposure	data_source.exposure	action	mr_keep
rs1131017	G	C	G	C	-1	0.022	0.444089	0.42	FALSE	TRUE	TRUE	7k2qZ8	0.0304	0.47	4524	outcome	TRUE	reported	textfile	RPS26	1.8e-59	0.0614884	exposure	TRUE	reported	y3b2jJ	textfile	2	FALSE
rs11684944	C	T	C	T	0.21	0.0011	0.415583	0.38	FALSE	FALSE	FALSE	7k2qZ8	0.0338	0.9748	4524	outcome	TRUE	reported	textfile	RPS7	7.1e-06	0.0467636	exposure	TRUE	reported	y3b2jJ	textfile	2	TRUE
rs12103674	C	T	C	T	0.25	-0.1493	0.140237	0.08	FALSE	FALSE	FALSE	7k2qZ8	0.0604	0.0134	4370	outcome	TRUE	reported	textfile	RPL19	1.2e-05	0.0571091	exposure	TRUE	reported	y3b2jJ	textfile	2	TRUE
rs12798081	A	G	A	G	-0.46	0.0782	0.066482	0.07	FALSE	FALSE	FALSE	7k2qZ8	0.0617	0.2049	4303	outcome	TRUE	reported	textfile	RPS3	1.1e-06	0.0944006	exposure	TRUE	reported	y3b2jJ	textfile	2	TRUE
rs12911848	A	G	A	G	0.2	-0.0271	0.357439	0.4	FALSE	FALSE	FALSE	7k2qZ8	0.0307	0.3773	4524	outcome	TRUE	reported	textfile	RPL4	3.7e-06	0.0432193	exposure	TRUE	reported	y3b2jJ	textfile	2	TRUE
rs146031396	T	C	T	C	-0.51	0.0916	0.019718	0.03	FALSE	FALSE	FALSE	7k2qZ8	0.1179	0.4372	3322	outcome	TRUE	reported	textfile	RPS23	4.9e-05	0.125605	exposure	TRUE	reported	y3b2jJ	textfile	2	TRUE
rs17700376	G	A	G	A	-0.37	0.0228	0.296294	0.36	FALSE	FALSE	FALSE	7k2qZ8	0.031	0.4617	4524	outcome	TRUE	reported	textfile	RPL28	3.2e-11	0.0557476	exposure	TRUE	reported	y3b2jJ	textfile	2	TRUE
rs226194	T	G	T	G	0.32	0.006	0.307222	0.69	FALSE	FALSE	FALSE	7k2qZ8	0.0322	0.8513	4524	outcome	TRUE	reported	textfile	RPS23	4.5e-12	0.0462393	exposure	TRUE	reported	y3b2jJ	textfile	2	TRUE
rs2608822	T	C	T	C	-0.63	0.0076	0.096846	0.94	FALSE	FALSE	FALSE	7k2qZ8	0.0664	0.9089	4303	outcome	TRUE	reported	textfile	RPL9	7.5e-07	0.127326	exposure	TRUE	reported	y3b2jJ	textfile	2	TRUE
rs2687967	A	G	A	G	-0.71	0.041	0.351855	0.71	FALSE	FALSE	FALSE	7k2qZ8	0.0328	0.2119	4524	outcome	TRUE	reported	textfile	RPL9	1.7e-30	0.061857	exposure	TRUE	reported	y3b2jJ	textfile	2	TRUE
rs2972574	C	T	C	T	-0.41	0.0187	0.411701	0.55	FALSE	FALSE	FALSE	7k2qZ8	0.0306	0.5408	4524	outcome	TRUE	reported	textfile	RPS28	8.1e-16	0.0509147	exposure	TRUE	reported	y3b2jJ	textfile	2	TRUE
rs3743850	T	G	T	G	0.31	-0.0007	0.149561	0.12	FALSE	FALSE	FALSE	7k2qZ8	0.0566	0.9906	3375	outcome	TRUE	reported	textfile	RPS2	1.4e-06	0.0642486	exposure	TRUE	reported	y3b2jJ	textfile	2	TRUE
rs4400487	T	C	T	C	0.26	0.0037	0.409701	0.56	FALSE	FALSE	FALSE	7k2qZ8	0.0313	0.9046	4524	outcome	TRUE	reported	textfile	RPL12	1.2e-09	0.0427614	exposure	TRUE	reported	y3b2jJ	textfile	2	TRUE
rs4850068	T	C	T	C	-0.22	-0.0044	0.401926	0.66	FALSE	FALSE	FALSE	7k2qZ8	0.0348	0.8985	4154	outcome	TRUE	reported	textfile	RPS7	3.5e-06	0.0474234	exposure	TRUE	reported	y3b2jJ	textfile	2	TRUE
rs56713196	G	C	G	C	-0.36	0.0318	0.13783	0.19	FALSE	TRUE	FALSE	7k2qZ8	0.0411	0.4391	4524	outcome	TRUE	reported	textfile	RPSA	2.5e-09	0.0603879	exposure	TRUE	reported	y3b2jJ	textfile	2	TRUE
rs6857705	C	T	C	T	0.31	-0.0131	0.467789	0.5	FALSE	FALSE	FALSE	7k2qZ8	0.0301	0.6644	4524	outcome	TRUE	reported	textfile	RPL9	3.6e-06	0.0669079	exposure	TRUE	reported	y3b2jJ	textfile	2	TRUE
rs8014170	G	C	G	C	0.19	0.0286	0.286155	0.24	FALSE	TRUE	FALSE	7k2qZ8	0.0354	0.4187	4524	outcome	TRUE	reported	textfile	RPL36AL	1.9e-06	0.0398843	exposure	TRUE	reported	y3b2jJ	textfile	2	TRUE
Small intestine-Longevity 90p
SNP	effect_allele.exposure	other_allele.exposure	effect_allele.outcome	other_allele.outcome	beta.exposure	beta.outcome	eaf.exposure	eaf.outcome	remove	palindromic	ambiguous	id.outcome	se.outcome	pval.outcome	samplesize.outcome	outcome	mr_keep.outcome	pval_origin.outcome	data_source.outcome	gene.exposure	pval.exposure	se.exposure	exposure	mr_keep.exposure	pval_origin.exposure	id.exposure	data_source.exposure	action	mr_keep
rs1057232	A	G	A	G	-0.34	0.0368	0.41518	0.55	FALSE	FALSE	FALSE	4yE0c3	0.0198	0.0636	11075	outcome	TRUE	reported	textfile	RPS28	8e-14	0.0455134	exposure	TRUE	reported	yS2oV7	textfile	2	TRUE
rs111772743	T	C	T	C	-0.25	-0.0016	0.30809	0.32	FALSE	FALSE	FALSE	4yE0c3	0.0206	0.9388	11615	outcome	TRUE	reported	textfile	RPS23	1.2e-09	0.0411168	exposure	TRUE	reported	yS2oV7	textfile	2	TRUE
rs1131017	G	C	G	C	-1.1	0.0149	0.444089	0.42	FALSE	TRUE	TRUE	4yE0c3	0.0195	0.4468	11615	outcome	TRUE	reported	textfile	RPS26	2.7e-54	0.0708941	exposure	TRUE	reported	yS2oV7	textfile	2	FALSE
rs115242230	A	T	A	T	0.48	-0.0175	0.046799	0.03	FALSE	TRUE	FALSE	4yE0c3	0.0738	0.8123	10613	outcome	TRUE	reported	textfile	RPS13	2.8e-08	0.0864319	exposure	TRUE	reported	yS2oV7	textfile	2	TRUE
rs116428782	C	G	C	G	0.34	0.0588	0.04257	0.03	FALSE	TRUE	FALSE	4yE0c3	0.0619	0.3421	11019	outcome	TRUE	reported	textfile	RPS10	3.6e-05	0.0822894	exposure	TRUE	reported	yS2oV7	textfile	2	TRUE
rs117396149	A	G	A	G	0.93	-0.033	0.026158	0.03	FALSE	FALSE	FALSE	4yE0c3	0.089	0.7109	7385	outcome	TRUE	reported	textfile	RPS26	3.2e-05	0.223625	exposure	TRUE	reported	yS2oV7	textfile	2	TRUE
rs12137819	A	T	A	T	-0.19	-0.0309	0.118264	0.14	FALSE	TRUE	FALSE	4yE0c3	0.0283	0.2748	11615	outcome	TRUE	reported	textfile	RPS8	5.7e-05	0.0472062	exposure	TRUE	reported	yS2oV7	textfile	2	TRUE
rs12486423	T	G	T	G	0.21	-0.0047	0.398029	0.48	FALSE	FALSE	FALSE	4yE0c3	0.0197	0.8107	11615	outcome	TRUE	reported	textfile	RPSA	9.5e-10	0.0343272	exposure	TRUE	reported	yS2oV7	textfile	2	TRUE
rs12795298	T	C	T	C	-0.38	0.0311	0.077742	0.07	FALSE	FALSE	FALSE	4yE0c3	0.0396	0.433	11615	outcome	TRUE	reported	textfile	RPS3	1.8e-08	0.0674932	exposure	TRUE	reported	yS2oV7	textfile	2	TRUE
rs12981098	A	G	A	G	0.3	-0.0231	0.093019	0.09	FALSE	FALSE	FALSE	4yE0c3	0.0538	0.6681	6525	outcome	TRUE	reported	textfile	RPL28	1.3e-05	0.0688057	exposure	TRUE	reported	yS2oV7	textfile	2	TRUE
rs140710809	T	C	T	C	-0.48	-0.0688	0.027771	0.04	FALSE	FALSE	FALSE	4yE0c3	0.0573	0.2293	10867	outcome	TRUE	reported	textfile	RPS23	6.9e-06	0.106744	exposure	TRUE	reported	yS2oV7	textfile	2	TRUE
rs141216206	C	T	C	T	-0.52	-0.0127	0.016053	0.02	FALSE	FALSE	FALSE	4yE0c3	0.077	0.8694	10894	outcome	TRUE	reported	textfile	RPS23	4e-06	0.112764	exposure	TRUE	reported	yS2oV7	textfile	2	TRUE
rs1458255	A	G	A	G	-0.58	0.0286	0.352894	0.7	FALSE	FALSE	FALSE	4yE0c3	0.0209	0.1707	11615	outcome	TRUE	reported	textfile	RPL9	4e-37	0.0455597	exposure	TRUE	reported	yS2oV7	textfile	2	TRUE
rs17700376	G	A	G	A	-0.28	0.0032	0.296294	0.36	FALSE	FALSE	FALSE	4yE0c3	0.0205	0.8775	11075	outcome	TRUE	reported	textfile	RPL28	1.8e-10	0.0439043	exposure	TRUE	reported	yS2oV7	textfile	2	TRUE
rs185869021	C	A	C	A	-1.8	0.035	0.011503	0.02	FALSE	FALSE	FALSE	4yE0c3	0.0884	0.6921	9765	outcome	TRUE	reported	textfile	RPL36AL	5.4e-05	0.445809	exposure	TRUE	reported	yS2oV7	textfile	2	TRUE
rs1901792	G	C	G	C	-0.34	0.0074	0.208588	0.2	FALSE	TRUE	FALSE	4yE0c3	0.0241	0.7572	11615	outcome	TRUE	reported	textfile	RPL36AL	2.2e-05	0.0801214	exposure	TRUE	reported	yS2oV7	textfile	2	TRUE
rs2076172	T	C	T	C	-0.19	0.0009	0.439082	0.55	FALSE	FALSE	FALSE	4yE0c3	0.0197	0.9623	11615	outcome	TRUE	reported	textfile	RPL10A	1.3e-07	0.0359927	exposure	TRUE	reported	yS2oV7	textfile	2	TRUE
rs2123999	C	T	C	T	-0.22	0.0145	0.428315	0.67	FALSE	FALSE	FALSE	4yE0c3	0.0205	0.4791	11615	outcome	TRUE	reported	textfile	RPL14	1.1e-07	0.0414361	exposure	TRUE	reported	yS2oV7	textfile	2	TRUE
rs2280370	G	T	G	T	-0.26	0.0115	0.199482	0.19	FALSE	FALSE	FALSE	4yE0c3	0.0247	0.6427	11615	outcome	TRUE	reported	textfile	RPL13	5.3e-07	0.0518432	exposure	TRUE	reported	yS2oV7	textfile	2	TRUE
rs2546404	T	C	T	C	-0.35	0.0095	0.139398	0.05	FALSE	FALSE	FALSE	4yE0c3	0.0526	0.8565	11050	outcome	TRUE	reported	textfile	RACK1	1.1e-05	0.0796084	exposure	TRUE	reported	yS2oV7	textfile	2	TRUE
rs2958519	A	G	A	G	0.33	0.017	0.434704	0.46	FALSE	FALSE	FALSE	4yE0c3	0.0194	0.3806	11615	outcome	TRUE	reported	textfile	RPL8	4.7e-13	0.0456198	exposure	TRUE	reported	yS2oV7	textfile	2	TRUE
rs3007030	T	C	T	C	0.56	0.0326	0.286685	0.76	FALSE	FALSE	FALSE	4yE0c3	0.0227	0.1506	11615	outcome	TRUE	reported	textfile	RPL36AL	1.3e-18	0.0635949	exposure	TRUE	reported	yS2oV7	textfile	2	TRUE
rs34934154	C	T	C	T	-0.19	0.0082	0.200905	0.26	FALSE	FALSE	FALSE	4yE0c3	0.0219	0.7087	11615	outcome	TRUE	reported	textfile	RPL22L1	1.6e-05	0.0440381	exposure	TRUE	reported	yS2oV7	textfile	2	TRUE
rs3761036	G	C	G	C	-0.24	0.0141	0.295128	0.41	FALSE	TRUE	FALSE	4yE0c3	0.02	0.4804	11615	outcome	TRUE	reported	textfile	UBA52	3.6e-11	0.0362556	exposure	TRUE	reported	yS2oV7	textfile	2	TRUE
rs3810232	C	A	C	A	-0.37	0.0201	0.297459	0.38	FALSE	FALSE	FALSE	4yE0c3	0.0197	0.308	11615	outcome	TRUE	reported	textfile	RPS9	5.3e-16	0.0456541	exposure	TRUE	reported	yS2oV7	textfile	2	TRUE
rs404109	T	C	T	C	0.32	-0.1601	0.8671	0.14	FALSE	FALSE	FALSE	4yE0c3	0.0479	0.000827	7822	outcome	TRUE	reported	textfile	RPS9	1.1e-05	0.0727848	exposure	TRUE	reported	yS2oV7	textfile	2	TRUE
rs4445645	C	G	C	G	-0.17	-0.0528	0.262639	0.22	FALSE	TRUE	FALSE	4yE0c3	0.0233	0.0234	11615	outcome	TRUE	reported	textfile	RPS25	3e-06	0.0363962	exposure	TRUE	reported	yS2oV7	textfile	2	TRUE
rs4779065	C	T	C	T	0.21	0.0394	0.184174	0.77	FALSE	FALSE	FALSE	4yE0c3	0.0228	0.08461	11615	outcome	TRUE	reported	textfile	RPS17	1.5e-06	0.0436478	exposure	TRUE	reported	yS2oV7	textfile	2	TRUE
rs530411	T	C	T	C	0.29	0.0062	0.439478	0.34	FALSE	FALSE	FALSE	4yE0c3	0.0205	0.7634	11615	outcome	TRUE	reported	textfile	RPS16	5.5e-15	0.0371085	exposure	TRUE	reported	yS2oV7	textfile	2	TRUE
rs72896138	A	G	A	G	-0.84	-0.0516	0.01689	0.03	FALSE	FALSE	FALSE	4yE0c3	0.0651	0.4276	11019	outcome	TRUE	reported	textfile	RPS18	5.3e-06	0.184512	exposure	TRUE	reported	yS2oV7	textfile	2	TRUE
rs731835	C	T	C	T	-0.19	0.0266	0.33096	0.33	FALSE	FALSE	FALSE	4yE0c3	0.021	0.2064	11615	outcome	TRUE	reported	textfile	RPS5	3.4e-06	0.0409038	exposure	TRUE	reported	yS2oV7	textfile	2	TRUE
rs74554154	T	C	T	C	0.35	0.0332	0.020328	0.03	FALSE	FALSE	FALSE	4yE0c3	0.0753	0.6597	9740	outcome	TRUE	reported	textfile	RPS8	2.1e-05	0.0822758	exposure	TRUE	reported	yS2oV7	textfile	2	TRUE
rs74731984	A	G	A	G	-0.17	-0.0071	0.228134	0.3	FALSE	FALSE	FALSE	4yE0c3	0.0215	0.7417	11615	outcome	TRUE	reported	textfile	RPS23	5e-05	0.0419171	exposure	TRUE	reported	yS2oV7	textfile	2	TRUE
rs747695	A	G	A	G	0.26	-0.0297	0.348623	0.37	FALSE	FALSE	FALSE	4yE0c3	0.0198	0.1347	11615	outcome	TRUE	reported	textfile	RPS18	2.6e-05	0.0618174	exposure	TRUE	reported	yS2oV7	textfile	2	TRUE
rs79592126	A	G	A	G	-1.1	0.075	0.01517	0.01	FALSE	FALSE	FALSE	4yE0c3	0.091	0.4102	9843	outcome	TRUE	reported	textfile	RPS18	4.6e-08	0.20124	exposure	TRUE	reported	yS2oV7	textfile	2	TRUE
rs80150520	T	G	T	G	-0.28	0.0478	0.159241	0.21	FALSE	FALSE	FALSE	4yE0c3	0.0255	0.06089	11050	outcome	TRUE	reported	textfile	RPL9	5.8e-06	0.0617617	exposure	TRUE	reported	yS2oV7	textfile	2	TRUE
rs9995998	T	C	T	C	-0.31	0.0001	0.19885	0.17	FALSE	FALSE	FALSE	4yE0c3	0.0251	0.9954	11615	outcome	TRUE	reported	textfile	RPL9	1.3e-06	0.0640528	exposure	TRUE	reported	yS2oV7	textfile	2	TRUE
Small intestine-Longevity 99p
SNP	effect_allele.exposure	other_allele.exposure	effect_allele.outcome	other_allele.outcome	beta.exposure	beta.outcome	eaf.exposure	eaf.outcome	remove	palindromic	ambiguous	id.outcome	se.outcome	pval.outcome	samplesize.outcome	outcome	mr_keep.outcome	pval_origin.outcome	data_source.outcome	gene.exposure	pval.exposure	se.exposure	exposure	mr_keep.exposure	pval_origin.exposure	id.exposure	data_source.exposure	action	mr_keep
rs1057232	A	G	A	G	-0.34	0.0167	0.41518	0.55	FALSE	FALSE	FALSE	ayNh28	0.0303	0.5814	4524	outcome	TRUE	reported	textfile	RPS28	8e-14	0.0455134	exposure	TRUE	reported	yS2oV7	textfile	2	TRUE
rs111772743	T	C	T	C	-0.25	0.0011	0.30809	0.33	FALSE	FALSE	FALSE	ayNh28	0.0319	0.9724	4524	outcome	TRUE	reported	textfile	RPS23	1.2e-09	0.0411168	exposure	TRUE	reported	yS2oV7	textfile	2	TRUE
rs1131017	G	C	G	C	-1.1	0.022	0.444089	0.42	FALSE	TRUE	TRUE	ayNh28	0.0304	0.47	4524	outcome	TRUE	reported	textfile	RPS26	2.7e-54	0.0708941	exposure	TRUE	reported	yS2oV7	textfile	2	FALSE
rs115242230	A	T	A	T	0.48	0.0287	0.046799	0.04	FALSE	TRUE	FALSE	ayNh28	0.1171	0.8066	3199	outcome	TRUE	reported	textfile	RPS13	2.8e-08	0.0864319	exposure	TRUE	reported	yS2oV7	textfile	2	TRUE
rs116428782	C	G	C	G	0.34	0.1042	0.04257	0.03	FALSE	TRUE	FALSE	ayNh28	0.1049	0.3207	3545	outcome	TRUE	reported	textfile	RPS10	3.6e-05	0.0822894	exposure	TRUE	reported	yS2oV7	textfile	2	TRUE
rs117396149	A	G	A	G	0.93	-0.0933	0.026158	0.03	FALSE	FALSE	FALSE	ayNh28	0.1555	0.5484	2371	outcome	TRUE	reported	textfile	RPS26	3.2e-05	0.223625	exposure	TRUE	reported	yS2oV7	textfile	2	TRUE
rs12137819	A	T	A	T	-0.19	-0.0559	0.118264	0.13	FALSE	TRUE	FALSE	ayNh28	0.0455	0.2196	4524	outcome	TRUE	reported	textfile	RPS8	5.7e-05	0.0472062	exposure	TRUE	reported	yS2oV7	textfile	2	TRUE
rs12486423	T	G	T	G	0.21	-0.0083	0.398029	0.47	FALSE	FALSE	FALSE	ayNh28	0.0307	0.7867	4524	outcome	TRUE	reported	textfile	RPSA	9.5e-10	0.0343272	exposure	TRUE	reported	yS2oV7	textfile	2	TRUE
rs12795298	T	C	T	C	-0.38	0.0644	0.077742	0.07	FALSE	FALSE	FALSE	ayNh28	0.0627	0.3048	4303	outcome	TRUE	reported	textfile	RPS3	1.8e-08	0.0674932	exposure	TRUE	reported	yS2oV7	textfile	2	TRUE
rs12981098	A	G	A	G	0.3	-0.0071	0.093019	0.1	FALSE	FALSE	FALSE	ayNh28	0.0896	0.9368	2729	outcome	TRUE	reported	textfile	RPL28	1.3e-05	0.0688057	exposure	TRUE	reported	yS2oV7	textfile	2	TRUE
rs140710809	T	C	T	C	-0.48	-0.0626	0.027771	0.04	FALSE	FALSE	FALSE	ayNh28	0.103	0.5433	3545	outcome	TRUE	reported	textfile	RPS23	6.9e-06	0.106744	exposure	TRUE	reported	yS2oV7	textfile	2	TRUE
rs141216206	C	T	C	T	-0.52	0.0079	0.016053	0.02	FALSE	FALSE	FALSE	ayNh28	0.1333	0.9529	3199	outcome	TRUE	reported	textfile	RPS23	4e-06	0.112764	exposure	TRUE	reported	yS2oV7	textfile	2	TRUE
rs1458255	A	G	A	G	-0.58	0.0409	0.352894	0.71	FALSE	FALSE	FALSE	ayNh28	0.0329	0.2132	4524	outcome	TRUE	reported	textfile	RPL9	4e-37	0.0455597	exposure	TRUE	reported	yS2oV7	textfile	2	TRUE
rs17700376	G	A	G	A	-0.28	0.0228	0.296294	0.36	FALSE	FALSE	FALSE	ayNh28	0.031	0.4617	4524	outcome	TRUE	reported	textfile	RPL28	1.8e-10	0.0439043	exposure	TRUE	reported	yS2oV7	textfile	2	TRUE
rs185869021	C	A	C	A	-1.8	-0.0891	0.011503	0.02	FALSE	FALSE	FALSE	ayNh28	0.1352	0.5098	3692	outcome	TRUE	reported	textfile	RPL36AL	5.4e-05	0.445809	exposure	TRUE	reported	yS2oV7	textfile	2	TRUE
rs1901792	G	C	G	C	-0.34	0.0387	0.208588	0.2	FALSE	TRUE	FALSE	ayNh28	0.0366	0.2906	4524	outcome	TRUE	reported	textfile	RPL36AL	2.2e-05	0.0801214	exposure	TRUE	reported	yS2oV7	textfile	2	TRUE
rs2076172	T	C	T	C	-0.19	-0.039	0.439082	0.53	FALSE	FALSE	FALSE	ayNh28	0.0307	0.2044	4524	outcome	TRUE	reported	textfile	RPL10A	1.3e-07	0.0359927	exposure	TRUE	reported	yS2oV7	textfile	2	TRUE
rs2123999	C	T	C	T	-0.22	0.0051	0.428315	0.67	FALSE	FALSE	FALSE	ayNh28	0.0319	0.8733	4524	outcome	TRUE	reported	textfile	RPL14	1.1e-07	0.0414361	exposure	TRUE	reported	yS2oV7	textfile	2	TRUE
rs2280370	G	T	G	T	-0.26	-0.0223	0.199482	0.2	FALSE	FALSE	FALSE	ayNh28	0.0383	0.5607	4524	outcome	TRUE	reported	textfile	RPL13	5.3e-07	0.0518432	exposure	TRUE	reported	yS2oV7	textfile	2	TRUE
rs2546404	T	C	T	C	-0.35	0.0404	0.139398	0.04	FALSE	FALSE	FALSE	ayNh28	0.0922	0.6611	3680	outcome	TRUE	reported	textfile	RACK1	1.1e-05	0.0796084	exposure	TRUE	reported	yS2oV7	textfile	2	TRUE
rs2958519	A	G	A	G	0.33	0.0122	0.434704	0.46	FALSE	FALSE	FALSE	ayNh28	0.0301	0.6856	4524	outcome	TRUE	reported	textfile	RPL8	4.7e-13	0.0456198	exposure	TRUE	reported	yS2oV7	textfile	2	TRUE
rs3007030	T	C	T	C	0.56	-0.0208	0.286685	0.76	FALSE	FALSE	FALSE	ayNh28	0.0353	0.5551	4524	outcome	TRUE	reported	textfile	RPL36AL	1.3e-18	0.0635949	exposure	TRUE	reported	yS2oV7	textfile	2	TRUE
rs34934154	C	T	C	T	-0.19	0.0347	0.200905	0.26	FALSE	FALSE	FALSE	ayNh28	0.0338	0.3054	4524	outcome	TRUE	reported	textfile	RPL22L1	1.6e-05	0.0440381	exposure	TRUE	reported	yS2oV7	textfile	2	TRUE
rs3761036	G	C	G	C	-0.24	0.0283	0.295128	0.41	FALSE	TRUE	FALSE	ayNh28	0.0313	0.3655	4524	outcome	TRUE	reported	textfile	UBA52	3.6e-11	0.0362556	exposure	TRUE	reported	yS2oV7	textfile	2	TRUE
rs3810232	C	A	C	A	-0.37	0.0331	0.297459	0.37	FALSE	FALSE	FALSE	ayNh28	0.0312	0.2897	4524	outcome	TRUE	reported	textfile	RPS9	5.3e-16	0.0456541	exposure	TRUE	reported	yS2oV7	textfile	2	TRUE
rs404109	T	C	T	C	0.32	-0.1696	0.8671	0.14	FALSE	FALSE	FALSE	ayNh28	0.0724	0.01908	3680	outcome	TRUE	reported	textfile	RPS9	1.1e-05	0.0727848	exposure	TRUE	reported	yS2oV7	textfile	2	TRUE
rs4445645	C	G	C	G	-0.17	-0.0509	0.262639	0.22	FALSE	TRUE	FALSE	ayNh28	0.0369	0.1678	4524	outcome	TRUE	reported	textfile	RPS25	3e-06	0.0363962	exposure	TRUE	reported	yS2oV7	textfile	2	TRUE
rs4779065	C	T	C	T	0.21	0.0616	0.184174	0.77	FALSE	FALSE	FALSE	ayNh28	0.0355	0.08263	4524	outcome	TRUE	reported	textfile	RPS17	1.5e-06	0.0436478	exposure	TRUE	reported	yS2oV7	textfile	2	TRUE
rs530411	T	C	T	C	0.29	0.008	0.439478	0.34	FALSE	FALSE	FALSE	ayNh28	0.0317	0.8008	4524	outcome	TRUE	reported	textfile	RPS16	5.5e-15	0.0371085	exposure	TRUE	reported	yS2oV7	textfile	2	TRUE
rs72896138	A	G	A	G	-0.84	0.0113	0.01689	0.03	FALSE	FALSE	FALSE	ayNh28	0.1059	0.9149	3915	outcome	TRUE	reported	textfile	RPS18	5.3e-06	0.184512	exposure	TRUE	reported	yS2oV7	textfile	2	TRUE
rs731835	C	T	C	T	-0.19	-0.0016	0.33096	0.34	FALSE	FALSE	FALSE	ayNh28	0.0328	0.9599	4524	outcome	TRUE	reported	textfile	RPS5	3.4e-06	0.0409038	exposure	TRUE	reported	yS2oV7	textfile	2	TRUE
rs74554154	T	C	T	C	0.35	0.18	0.020328	0.03	FALSE	FALSE	FALSE	ayNh28	0.1224	0.1415	3322	outcome	TRUE	reported	textfile	RPS8	2.1e-05	0.0822758	exposure	TRUE	reported	yS2oV7	textfile	2	TRUE
rs74731984	A	G	A	G	-0.17	0.0122	0.228134	0.3	FALSE	FALSE	FALSE	ayNh28	0.0333	0.7147	4524	outcome	TRUE	reported	textfile	RPS23	5e-05	0.0419171	exposure	TRUE	reported	yS2oV7	textfile	2	TRUE
rs747695	A	G	A	G	0.26	-0.0445	0.348623	0.37	FALSE	FALSE	FALSE	ayNh28	0.031	0.1502	4524	outcome	TRUE	reported	textfile	RPS18	2.6e-05	0.0618174	exposure	TRUE	reported	yS2oV7	textfile	2	TRUE
rs79592126	A	G	A	G	-1.1	0.1992	0.01517	0.02	FALSE	FALSE	FALSE	ayNh28	0.1763	0.2584	2829	outcome	TRUE	reported	textfile	RPS18	4.6e-08	0.20124	exposure	TRUE	reported	yS2oV7	textfile	2	TRUE
rs80150520	T	G	T	G	-0.28	0.0745	0.159241	0.21	FALSE	FALSE	FALSE	ayNh28	0.0411	0.07019	4154	outcome	TRUE	reported	textfile	RPL9	5.8e-06	0.0617617	exposure	TRUE	reported	yS2oV7	textfile	2	TRUE
rs9995998	T	C	T	C	-0.31	0.0127	0.19885	0.18	FALSE	FALSE	FALSE	ayNh28	0.0393	0.7464	4524	outcome	TRUE	reported	textfile	RPL9	1.3e-06	0.0640528	exposure	TRUE	reported	yS2oV7	textfile	2	TRUE
Pituitary-Longevity 90p
SNP	effect_allele.exposure	other_allele.exposure	effect_allele.outcome	other_allele.outcome	beta.exposure	beta.outcome	eaf.exposure	eaf.outcome	remove	palindromic	ambiguous	id.outcome	se.outcome	pval.outcome	samplesize.outcome	outcome	mr_keep.outcome	pval_origin.outcome	data_source.outcome	gene.exposure	pval.exposure	se.exposure	exposure	mr_keep.exposure	pval_origin.exposure	id.exposure	data_source.exposure	action	mr_keep
rs1057232	A	G	A	G	-0.6	0.0368	0.41518	0.55	FALSE	FALSE	FALSE	39F45I	0.0198	0.0636	11075	outcome	TRUE	reported	textfile	RPS28	2.5e-29	0.0533653	exposure	TRUE	reported	5WQQJl	textfile	2	TRUE
rs11097009	G	A	G	A	-0.3	0.0367	0.381549	0.71	FALSE	FALSE	FALSE	39F45I	0.0213	0.08423	11615	outcome	TRUE	reported	textfile	RPL9	4.7e-05	0.0737089	exposure	TRUE	reported	5WQQJl	textfile	2	TRUE
rs11157696	G	C	G	C	0.51	-0.0304	0.320647	0.23	FALSE	TRUE	FALSE	39F45I	0.0229	0.1833	11615	outcome	TRUE	reported	textfile	RPL36AL	1e-33	0.0421332	exposure	TRUE	reported	5WQQJl	textfile	2	TRUE
rs11171773	G	A	G	A	-0.68	0.024	0.226101	0.93	FALSE	FALSE	FALSE	39F45I	0.0424	0.5705	11615	outcome	TRUE	reported	textfile	RPS26	2.8e-05	0.162324	exposure	TRUE	reported	5WQQJl	textfile	2	TRUE
rs112393535	G	A	G	A	-0.63	-0.1205	0.014017	0.02	FALSE	FALSE	FALSE	39F45I	0.1192	0.3117	7168	outcome	TRUE	reported	textfile	RPL37	2.5e-05	0.149473	exposure	TRUE	reported	5WQQJl	textfile	2	TRUE
rs1131017	G	C	G	C	-1.3	0.0149	0.444089	0.42	FALSE	TRUE	TRUE	39F45I	0.0195	0.4468	11615	outcome	TRUE	reported	textfile	RPS26	1.1e-105	0.0595398	exposure	TRUE	reported	5WQQJl	textfile	2	FALSE
rs1135628	G	C	G	C	-0.23	-0.0064	0.267173	0.25	FALSE	TRUE	FALSE	39F45I	0.0247	0.7957	11050	outcome	TRUE	reported	textfile	RPLP2	2.6e-08	0.0413191	exposure	TRUE	reported	5WQQJl	textfile	2	TRUE
rs11589147	T	A	T	A	-0.33	-0.0075	0.095912	0.12	FALSE	TRUE	FALSE	39F45I	0.0313	0.8114	11050	outcome	TRUE	reported	textfile	RPS8	3.6e-08	0.0598973	exposure	TRUE	reported	5WQQJl	textfile	2	TRUE
rs11614512	T	C	T	C	0.55	0.0055	0.073322	0.12	FALSE	FALSE	FALSE	39F45I	0.0451	0.9034	8512	outcome	TRUE	reported	textfile	RPS26	7.8e-05	0.139224	exposure	TRUE	reported	5WQQJl	textfile	2	TRUE
rs11715522	C	A	C	A	0.26	0.002	0.359131	0.39	FALSE	FALSE	FALSE	39F45I	0.0205	0.9209	11050	outcome	TRUE	reported	textfile	RPSA	8.3e-07	0.0527578	exposure	TRUE	reported	5WQQJl	textfile	2	TRUE
rs12525930	C	T	C	T	-0.21	0.0025	0.443721	0.55	FALSE	FALSE	FALSE	39F45I	0.0196	0.898	11615	outcome	TRUE	reported	textfile	RPL10A	3.3e-07	0.0411325	exposure	TRUE	reported	5WQQJl	textfile	2	TRUE
rs12608956	T	C	T	C	-0.21	0.0335	0.241257	0.33	FALSE	FALSE	FALSE	39F45I	0.0232	0.1491	11050	outcome	TRUE	reported	textfile	RPS5	2.8e-05	0.0501295	exposure	TRUE	reported	5WQQJl	textfile	2	TRUE
rs1315223	G	A	G	A	0.24	-0.0121	0.306332	0.66	FALSE	FALSE	FALSE	39F45I	0.021	0.5645	11050	outcome	TRUE	reported	textfile	RPS3	3e-05	0.0575061	exposure	TRUE	reported	5WQQJl	textfile	2	TRUE
rs139829601	C	T	C	T	-1.2	-0.0872	0.013826	0.02	FALSE	FALSE	FALSE	39F45I	0.09	0.3327	10146	outcome	TRUE	reported	textfile	RPS27A	2.6e-07	0.232994	exposure	TRUE	reported	5WQQJl	textfile	2	TRUE
rs140116753	G	A	G	A	0.67	-0.0096	0.038063	0.06	FALSE	FALSE	FALSE	39F45I	0.0558	0.8629	10202	outcome	TRUE	reported	textfile	RPS26	5.9e-05	0.1668	exposure	TRUE	reported	5WQQJl	textfile	2	TRUE
rs144131441	C	G	C	G	-0.58	-0.0377	0.049579	0.07	FALSE	TRUE	FALSE	39F45I	0.0421	0.3702	11615	outcome	TRUE	reported	textfile	RPS26	1.8e-05	0.13525	exposure	TRUE	reported	5WQQJl	textfile	2	TRUE
rs144474740	T	C	T	C	0.39	0.0031	0.03714	0.07	FALSE	FALSE	FALSE	39F45I	0.0415	0.9414	11050	outcome	TRUE	reported	textfile	UBA52	1.4e-07	0.0740706	exposure	TRUE	reported	5WQQJl	textfile	2	TRUE
rs150519319	T	C	T	C	0.48	0.0148	0.029978	0.03	FALSE	FALSE	FALSE	39F45I	0.0726	0.8384	11019	outcome	TRUE	reported	textfile	RPS17	2.3e-05	0.113379	exposure	TRUE	reported	5WQQJl	textfile	2	TRUE
rs1542596	A	G	A	G	-0.19	0.0101	0.374705	0.44	FALSE	FALSE	FALSE	39F45I	0.0193	0.6025	11615	outcome	TRUE	reported	textfile	RPS23	3.2e-05	0.0456869	exposure	TRUE	reported	5WQQJl	textfile	2	TRUE
rs16933837	G	A	G	A	0.62	-0.0189	0.058219	0.03	FALSE	FALSE	FALSE	39F45I	0.074	0.7988	10613	outcome	TRUE	reported	textfile	RPS13	9.6e-11	0.0957807	exposure	TRUE	reported	5WQQJl	textfile	2	TRUE
rs173665	A	G	A	G	0.59	-0.0194	0.107111	0.1	FALSE	FALSE	FALSE	39F45I	0.0361	0.5909	11075	outcome	TRUE	reported	textfile	RPS28	2.5e-08	0.105862	exposure	TRUE	reported	5WQQJl	textfile	2	TRUE
rs17700376	G	A	G	A	-0.43	0.0032	0.296294	0.36	FALSE	FALSE	FALSE	39F45I	0.0205	0.8775	11075	outcome	TRUE	reported	textfile	RPL28	8.6e-24	0.0427584	exposure	TRUE	reported	5WQQJl	textfile	2	TRUE
rs17813240	T	C	T	C	0.24	-0.0129	0.139694	0.22	FALSE	FALSE	FALSE	39F45I	0.0235	0.5829	11615	outcome	TRUE	reported	textfile	RPS20	2e-07	0.0461597	exposure	TRUE	reported	5WQQJl	textfile	2	TRUE
rs2247133	T	G	T	G	0.25	-0.0243	0.3945	0.64	FALSE	FALSE	FALSE	39F45I	0.0254	0.3372	9358	outcome	TRUE	reported	textfile	RPS9	1.1e-05	0.0568632	exposure	TRUE	reported	5WQQJl	textfile	2	TRUE
rs2259073	C	A	C	A	-0.39	-0.0071	0.12641	0.16	FALSE	FALSE	FALSE	39F45I	0.0264	0.788	11615	outcome	TRUE	reported	textfile	RPL9	6.2e-06	0.0862936	exposure	TRUE	reported	5WQQJl	textfile	2	TRUE
rs2271489	G	C	G	C	0.37	-0.05	0.088786	0.1	FALSE	TRUE	FALSE	39F45I	0.032	0.1176	11615	outcome	TRUE	reported	textfile	RPSA	2.7e-05	0.0881499	exposure	TRUE	reported	5WQQJl	textfile	2	TRUE
rs2499767	G	A	G	A	-0.22	-0.0475	0.373447	0.72	FALSE	FALSE	FALSE	39F45I	0.0321	0.1391	8336	outcome	TRUE	reported	textfile	RPS10	5.7e-06	0.0484878	exposure	TRUE	reported	5WQQJl	textfile	2	TRUE
rs2687969	C	T	C	T	-0.82	0.027	0.365612	0.7	FALSE	FALSE	FALSE	39F45I	0.0209	0.1959	11615	outcome	TRUE	reported	textfile	RPL9	2e-65	0.0480021	exposure	TRUE	reported	5WQQJl	textfile	2	TRUE
rs2720008	T	C	T	C	-0.21	0.01	0.156322	0.19	FALSE	FALSE	FALSE	39F45I	0.0331	0.7632	10385	outcome	TRUE	reported	textfile	RPS24	4.6e-05	0.0515328	exposure	TRUE	reported	5WQQJl	textfile	2	TRUE
rs2818827	G	A	G	A	0.27	-0.024	0.483285	0.6	FALSE	FALSE	FALSE	39F45I	0.02	0.2294	11615	outcome	TRUE	reported	textfile	RPS24	1.3e-11	0.0398898	exposure	TRUE	reported	5WQQJl	textfile	2	TRUE
rs2954658	T	C	T	C	-0.35	-0.0128	0.422902	0.51	FALSE	FALSE	FALSE	39F45I	0.0204	0.5307	11050	outcome	TRUE	reported	textfile	RPL8	2.6e-18	0.0401024	exposure	TRUE	reported	5WQQJl	textfile	2	TRUE
rs34587559	T	C	T	C	-0.23	0.0143	0.191348	0.25	FALSE	FALSE	FALSE	39F45I	0.0223	0.522	11615	outcome	TRUE	reported	textfile	RPL22L1	1.7e-05	0.0534755	exposure	TRUE	reported	5WQQJl	textfile	2	TRUE
rs3738	C	A	C	A	-0.57	-0.0045	0.32623	0.31	FALSE	FALSE	FALSE	39F45I	0.0208	0.8299	11615	outcome	TRUE	reported	textfile	RPS23	1.1e-39	0.0432377	exposure	TRUE	reported	5WQQJl	textfile	2	TRUE
rs3810232	C	A	C	A	-0.61	0.0201	0.297459	0.38	FALSE	FALSE	FALSE	39F45I	0.0197	0.308	11615	outcome	TRUE	reported	textfile	RPS9	7.3e-33	0.0510877	exposure	TRUE	reported	5WQQJl	textfile	2	TRUE
rs404109	T	C	T	C	0.34	-0.1601	0.8671	0.14	FALSE	FALSE	FALSE	39F45I	0.0479	0.000827	7822	outcome	TRUE	reported	textfile	RPS9	1.3e-05	0.0779798	exposure	TRUE	reported	5WQQJl	textfile	2	TRUE
rs4400487	T	C	T	C	0.39	-0.0052	0.409701	0.56	FALSE	FALSE	FALSE	39F45I	0.02	0.7962	11615	outcome	TRUE	reported	textfile	RPL12	6.8e-17	0.046704	exposure	TRUE	reported	5WQQJl	textfile	2	TRUE
rs4417323	G	C	G	C	0.46	0.0404	0.188984	0.25	FALSE	TRUE	FALSE	39F45I	0.0312	0.1949	10510	outcome	TRUE	reported	textfile	RPS26	9e-06	0.103606	exposure	TRUE	reported	5WQQJl	textfile	2	TRUE
rs45500193	T	C	T	C	-0.43	-0.0248	0.039923	0.06	FALSE	FALSE	FALSE	39F45I	0.0523	0.6349	10867	outcome	TRUE	reported	textfile	RPL10A	2.6e-07	0.0834895	exposure	TRUE	reported	5WQQJl	textfile	2	TRUE
rs4676494	C	A	C	A	-0.45	0.0085	0.490207	0.51	FALSE	FALSE	FALSE	39F45I	0.0194	0.6609	11615	outcome	TRUE	reported	textfile	RPSA	2e-18	0.0513858	exposure	TRUE	reported	5WQQJl	textfile	2	TRUE
rs58971671	A	G	A	G	0.79	-0.0284	0.122632	0.04	FALSE	FALSE	FALSE	39F45I	0.0547	0.6036	11202	outcome	TRUE	reported	textfile	RPL9	4.8e-08	0.144727	exposure	TRUE	reported	5WQQJl	textfile	2	TRUE
rs61734492	T	G	T	G	-0.53	-0.0042	0.08128	0.92	FALSE	FALSE	FALSE	39F45I	0.0547	0.9382	7639	outcome	TRUE	reported	textfile	RPS9	3.7e-06	0.114531	exposure	TRUE	reported	5WQQJl	textfile	2	TRUE
rs6478778	T	G	T	G	0.55	0.0255	0.136116	0.09	FALSE	FALSE	FALSE	39F45I	0.0341	0.455	11615	outcome	TRUE	reported	textfile	RPL12	7.9e-10	0.0894757	exposure	TRUE	reported	5WQQJl	textfile	2	TRUE
rs6800209	A	G	A	G	-0.48	0.0144	0.045255	0.07	FALSE	FALSE	FALSE	39F45I	0.0396	0.7171	11615	outcome	TRUE	reported	textfile	RPSA	1.8e-06	0.10053	exposure	TRUE	reported	5WQQJl	textfile	2	TRUE
rs6872844	T	A	T	A	-0.2	0.0015	0.339831	0.3	FALSE	TRUE	FALSE	39F45I	0.022	0.9441	11050	outcome	TRUE	reported	textfile	RPS14	3.1e-05	0.0480078	exposure	TRUE	reported	5WQQJl	textfile	2	TRUE
rs692609	C	A	C	A	-0.21	0.0393	0.22978	0.89	FALSE	FALSE	FALSE	39F45I	0.055	0.4747	7874	outcome	TRUE	reported	textfile	RPL27	7.7e-05	0.0531168	exposure	TRUE	reported	5WQQJl	textfile	2	TRUE
rs7160493	C	G	C	G	-0.4	0.0264	0.079472	0.09	FALSE	TRUE	FALSE	39F45I	0.0447	0.5546	10510	outcome	TRUE	reported	textfile	RPL36AL	1.4e-07	0.0759698	exposure	TRUE	reported	5WQQJl	textfile	2	TRUE
rs72699313	C	A	C	A	-0.4	-0.0772	0.06758	0.1	FALSE	FALSE	FALSE	39F45I	0.0393	0.04959	10510	outcome	TRUE	reported	textfile	RPL8	3.8e-08	0.0727286	exposure	TRUE	reported	5WQQJl	textfile	2	TRUE
rs73567692	C	T	C	T	-0.38	-0.0172	0.07053	0.07	FALSE	FALSE	FALSE	39F45I	0.0385	0.6551	11615	outcome	TRUE	reported	textfile	RPL7A	1e-06	0.0776836	exposure	TRUE	reported	5WQQJl	textfile	2	TRUE
rs73617860	G	T	G	T	0.26	-0.0025	0.271411	0.15	FALSE	FALSE	FALSE	39F45I	0.0298	0.9339	10510	outcome	TRUE	reported	textfile	RPL28	6.9e-06	0.0578195	exposure	TRUE	reported	5WQQJl	textfile	2	TRUE
rs73939921	G	A	G	A	0.46	-0.0545	0.060875	0.04	FALSE	FALSE	FALSE	39F45I	0.052	0.2954	11202	outcome	TRUE	reported	textfile	RPS5	5.2e-05	0.11368	exposure	TRUE	reported	5WQQJl	textfile	2	TRUE
rs74659866	A	C	A	C	0.58	0.0383	0.075335	0.04	FALSE	FALSE	FALSE	39F45I	0.0533	0.4727	11615	outcome	TRUE	reported	textfile	RPL12	2.8e-05	0.138453	exposure	TRUE	reported	5WQQJl	textfile	2	TRUE
rs74731984	A	G	A	G	-0.24	-0.0071	0.228134	0.3	FALSE	FALSE	FALSE	39F45I	0.0215	0.7417	11615	outcome	TRUE	reported	textfile	RPS23	2.2e-07	0.0463178	exposure	TRUE	reported	5WQQJl	textfile	2	TRUE
rs7648	G	C	G	C	-0.28	0.008	0.487243	0.45	FALSE	TRUE	TRUE	39F45I	0.0193	0.6802	11615	outcome	TRUE	reported	textfile	UBA52	2.6e-14	0.0367607	exposure	TRUE	reported	5WQQJl	textfile	2	FALSE
rs773126	A	T	A	T	0.4	0.0003	0.369721	0.41	FALSE	TRUE	FALSE	39F45I	0.0266	0.9921	10202	outcome	TRUE	reported	textfile	RPS26	1.1e-06	0.0820875	exposure	TRUE	reported	5WQQJl	textfile	2	TRUE
rs77745910	T	C	T	C	-0.28	-0.0251	0.103382	0.15	FALSE	FALSE	FALSE	39F45I	0.0295	0.3946	11050	outcome	TRUE	reported	textfile	RPS23	8.5e-06	0.0628904	exposure	TRUE	reported	5WQQJl	textfile	2	TRUE
rs78384777	T	A	T	A	0.86	-0.072	0.034176	0.06	FALSE	TRUE	FALSE	39F45I	0.0442	0.1027	11615	outcome	TRUE	reported	textfile	RPL9	1.7e-10	0.134664	exposure	TRUE	reported	5WQQJl	textfile	2	TRUE
Pituitary-Longevity 99p
SNP	effect_allele.exposure	other_allele.exposure	effect_allele.outcome	other_allele.outcome	beta.exposure	beta.outcome	eaf.exposure	eaf.outcome	remove	palindromic	ambiguous	id.outcome	se.outcome	pval.outcome	samplesize.outcome	outcome	mr_keep.outcome	pval_origin.outcome	data_source.outcome	gene.exposure	pval.exposure	se.exposure	exposure	mr_keep.exposure	pval_origin.exposure	id.exposure	data_source.exposure	action	mr_keep
rs1057232	A	G	A	G	-0.6	0.0167	0.41518	0.55	FALSE	FALSE	FALSE	aNU7xZ	0.0303	0.5814	4524	outcome	TRUE	reported	textfile	RPS28	2.5e-29	0.0533653	exposure	TRUE	reported	5WQQJl	textfile	2	TRUE
rs11097009	G	A	G	A	-0.3	0.029	0.381549	0.71	FALSE	FALSE	FALSE	aNU7xZ	0.0338	0.3905	4524	outcome	TRUE	reported	textfile	RPL9	4.7e-05	0.0737089	exposure	TRUE	reported	5WQQJl	textfile	2	TRUE
rs11157696	G	C	G	C	0.51	0.0206	0.320647	0.24	FALSE	TRUE	FALSE	aNU7xZ	0.0357	0.5638	4524	outcome	TRUE	reported	textfile	RPL36AL	1e-33	0.0421332	exposure	TRUE	reported	5WQQJl	textfile	2	TRUE
rs11171773	G	A	G	A	-0.68	0.0533	0.226101	0.92	FALSE	FALSE	FALSE	aNU7xZ	0.0654	0.4152	4303	outcome	TRUE	reported	textfile	RPS26	2.8e-05	0.162324	exposure	TRUE	reported	5WQQJl	textfile	2	TRUE
rs112393535	G	A	G	A	-0.63	-0.3319	0.014017	0.02	FALSE	FALSE	FALSE	aNU7xZ	0.1841	0.07135	2273	outcome	TRUE	reported	textfile	RPL37	2.5e-05	0.149473	exposure	TRUE	reported	5WQQJl	textfile	2	TRUE
rs1131017	G	C	G	C	-1.3	0.022	0.444089	0.42	FALSE	TRUE	TRUE	aNU7xZ	0.0304	0.47	4524	outcome	TRUE	reported	textfile	RPS26	1.1e-105	0.0595398	exposure	TRUE	reported	5WQQJl	textfile	2	FALSE
rs1135628	G	C	G	C	-0.23	0.0433	0.267173	0.25	FALSE	TRUE	FALSE	aNU7xZ	0.04	0.2797	4154	outcome	TRUE	reported	textfile	RPLP2	2.6e-08	0.0413191	exposure	TRUE	reported	5WQQJl	textfile	2	TRUE
rs11589147	T	A	T	A	-0.33	-0.0107	0.095912	0.12	FALSE	TRUE	FALSE	aNU7xZ	0.0516	0.8356	4154	outcome	TRUE	reported	textfile	RPS8	3.6e-08	0.0598973	exposure	TRUE	reported	5WQQJl	textfile	2	TRUE
rs11614512	T	C	T	C	0.55	0.0272	0.073322	0.12	FALSE	FALSE	FALSE	aNU7xZ	0.0696	0.6959	3680	outcome	TRUE	reported	textfile	RPS26	7.8e-05	0.139224	exposure	TRUE	reported	5WQQJl	textfile	2	TRUE
rs11715522	C	A	C	A	0.26	-0.0159	0.359131	0.39	FALSE	FALSE	FALSE	aNU7xZ	0.0333	0.6335	4154	outcome	TRUE	reported	textfile	RPSA	8.3e-07	0.0527578	exposure	TRUE	reported	5WQQJl	textfile	2	TRUE
rs12525930	C	T	C	T	-0.21	-0.0379	0.443721	0.53	FALSE	FALSE	FALSE	aNU7xZ	0.0307	0.2161	4524	outcome	TRUE	reported	textfile	RPL10A	3.3e-07	0.0411325	exposure	TRUE	reported	5WQQJl	textfile	2	TRUE
rs12608956	T	C	T	C	-0.21	-0.001	0.241257	0.33	FALSE	FALSE	FALSE	aNU7xZ	0.0373	0.9789	4154	outcome	TRUE	reported	textfile	RPS5	2.8e-05	0.0501295	exposure	TRUE	reported	5WQQJl	textfile	2	TRUE
rs1315223	G	A	G	A	0.24	0.0169	0.306332	0.66	FALSE	FALSE	FALSE	aNU7xZ	0.0338	0.6175	4154	outcome	TRUE	reported	textfile	RPS3	3e-05	0.0575061	exposure	TRUE	reported	5WQQJl	textfile	2	TRUE
rs139829601	C	T	C	T	-1.2	-0.0893	0.013826	0.01	FALSE	FALSE	FALSE	aNU7xZ	0.1681	0.5952	3322	outcome	TRUE	reported	textfile	RPS27A	2.6e-07	0.232994	exposure	TRUE	reported	5WQQJl	textfile	2	TRUE
rs140116753	G	A	G	A	0.67	0.0942	0.038063	0.06	FALSE	FALSE	FALSE	aNU7xZ	0.0871	0.2797	3680	outcome	TRUE	reported	textfile	RPS26	5.9e-05	0.1668	exposure	TRUE	reported	5WQQJl	textfile	2	TRUE
rs144131441	C	G	C	G	-0.58	0.0085	0.049579	0.07	FALSE	TRUE	FALSE	aNU7xZ	0.0687	0.901	4303	outcome	TRUE	reported	textfile	RPS26	1.8e-05	0.13525	exposure	TRUE	reported	5WQQJl	textfile	2	TRUE
rs144474740	T	C	T	C	0.39	0.0953	0.03714	0.07	FALSE	FALSE	FALSE	aNU7xZ	0.0713	0.1817	3933	outcome	TRUE	reported	textfile	UBA52	1.4e-07	0.0740706	exposure	TRUE	reported	5WQQJl	textfile	2	TRUE
rs150519319	T	C	T	C	0.48	-0.0446	0.029978	0.02	FALSE	FALSE	FALSE	aNU7xZ	0.1324	0.7361	3692	outcome	TRUE	reported	textfile	RPS17	2.3e-05	0.113379	exposure	TRUE	reported	5WQQJl	textfile	2	TRUE
rs1542596	A	G	A	G	-0.19	0.0298	0.374705	0.44	FALSE	FALSE	FALSE	aNU7xZ	0.03	0.3203	4524	outcome	TRUE	reported	textfile	RPS23	3.2e-05	0.0456869	exposure	TRUE	reported	5WQQJl	textfile	2	TRUE
rs16933837	G	A	G	A	0.62	0.0171	0.058219	0.03	FALSE	FALSE	FALSE	aNU7xZ	0.1187	0.8852	3199	outcome	TRUE	reported	textfile	RPS13	9.6e-11	0.0957807	exposure	TRUE	reported	5WQQJl	textfile	2	TRUE
rs173665	A	G	A	G	0.59	-0.031	0.107111	0.1	FALSE	FALSE	FALSE	aNU7xZ	0.0555	0.5766	4524	outcome	TRUE	reported	textfile	RPS28	2.5e-08	0.105862	exposure	TRUE	reported	5WQQJl	textfile	2	TRUE
rs17700376	G	A	G	A	-0.43	0.0228	0.296294	0.36	FALSE	FALSE	FALSE	aNU7xZ	0.031	0.4617	4524	outcome	TRUE	reported	textfile	RPL28	8.6e-24	0.0427584	exposure	TRUE	reported	5WQQJl	textfile	2	TRUE
rs17813240	T	C	T	C	0.24	-0.0401	0.139694	0.23	FALSE	FALSE	FALSE	aNU7xZ	0.0363	0.2697	4524	outcome	TRUE	reported	textfile	RPS20	2e-07	0.0461597	exposure	TRUE	reported	5WQQJl	textfile	2	TRUE
rs2247133	T	G	T	G	0.25	-0.001	0.3945	0.64	FALSE	FALSE	FALSE	aNU7xZ	0.0386	0.9785	4033	outcome	TRUE	reported	textfile	RPS9	1.1e-05	0.0568632	exposure	TRUE	reported	5WQQJl	textfile	2	TRUE
rs2259073	C	A	C	A	-0.39	-0.0558	0.12641	0.16	FALSE	FALSE	FALSE	aNU7xZ	0.0418	0.1818	4524	outcome	TRUE	reported	textfile	RPL9	6.2e-06	0.0862936	exposure	TRUE	reported	5WQQJl	textfile	2	TRUE
rs2271489	G	C	G	C	0.37	-0.0116	0.088786	0.11	FALSE	TRUE	FALSE	aNU7xZ	0.05	0.8165	4524	outcome	TRUE	reported	textfile	RPSA	2.7e-05	0.0881499	exposure	TRUE	reported	5WQQJl	textfile	2	TRUE
rs2499767	G	A	G	A	-0.22	-0.0746	0.373447	0.72	FALSE	FALSE	FALSE	aNU7xZ	0.0536	0.1645	2950	outcome	TRUE	reported	textfile	RPS10	5.7e-06	0.0484878	exposure	TRUE	reported	5WQQJl	textfile	2	TRUE
rs2687969	C	T	C	T	-0.82	0.0393	0.365612	0.7	FALSE	FALSE	FALSE	aNU7xZ	0.0329	0.2322	4524	outcome	TRUE	reported	textfile	RPL9	2e-65	0.0480021	exposure	TRUE	reported	5WQQJl	textfile	2	TRUE
rs2720008	T	C	T	C	-0.21	-0.0771	0.156322	0.21	FALSE	FALSE	FALSE	aNU7xZ	0.0494	0.1184	4117	outcome	TRUE	reported	textfile	RPS24	4.6e-05	0.0515328	exposure	TRUE	reported	5WQQJl	textfile	2	TRUE
rs2818827	G	A	G	A	0.27	-0.0354	0.483285	0.59	FALSE	FALSE	FALSE	aNU7xZ	0.031	0.2539	4524	outcome	TRUE	reported	textfile	RPS24	1.3e-11	0.0398898	exposure	TRUE	reported	5WQQJl	textfile	2	TRUE
rs2954658	T	C	T	C	-0.35	-0.0187	0.422902	0.51	FALSE	FALSE	FALSE	aNU7xZ	0.0329	0.5703	4154	outcome	TRUE	reported	textfile	RPL8	2.6e-18	0.0401024	exposure	TRUE	reported	5WQQJl	textfile	2	TRUE
rs34587559	T	C	T	C	-0.23	0.0454	0.191348	0.25	FALSE	FALSE	FALSE	aNU7xZ	0.0344	0.1869	4524	outcome	TRUE	reported	textfile	RPL22L1	1.7e-05	0.0534755	exposure	TRUE	reported	5WQQJl	textfile	2	TRUE
rs3738	C	A	C	A	-0.57	-0.0055	0.32623	0.32	FALSE	FALSE	FALSE	aNU7xZ	0.0321	0.8642	4524	outcome	TRUE	reported	textfile	RPS23	1.1e-39	0.0432377	exposure	TRUE	reported	5WQQJl	textfile	2	TRUE
rs3810232	C	A	C	A	-0.61	0.0331	0.297459	0.37	FALSE	FALSE	FALSE	aNU7xZ	0.0312	0.2897	4524	outcome	TRUE	reported	textfile	RPS9	7.3e-33	0.0510877	exposure	TRUE	reported	5WQQJl	textfile	2	TRUE
rs404109	T	C	T	C	0.34	-0.1696	0.8671	0.14	FALSE	FALSE	FALSE	aNU7xZ	0.0724	0.01908	3680	outcome	TRUE	reported	textfile	RPS9	1.3e-05	0.0779798	exposure	TRUE	reported	5WQQJl	textfile	2	TRUE
rs4400487	T	C	T	C	0.39	0.0037	0.409701	0.56	FALSE	FALSE	FALSE	aNU7xZ	0.0313	0.9046	4524	outcome	TRUE	reported	textfile	RPL12	6.8e-17	0.046704	exposure	TRUE	reported	5WQQJl	textfile	2	TRUE
rs4417323	G	C	G	C	0.46	0.0856	0.188984	0.25	FALSE	TRUE	FALSE	aNU7xZ	0.0495	0.08355	4000	outcome	TRUE	reported	textfile	RPS26	9e-06	0.103606	exposure	TRUE	reported	5WQQJl	textfile	2	TRUE
rs45500193	T	C	T	C	-0.43	0.0036	0.039923	0.06	FALSE	FALSE	FALSE	aNU7xZ	0.0861	0.9667	3545	outcome	TRUE	reported	textfile	RPL10A	2.6e-07	0.0834895	exposure	TRUE	reported	5WQQJl	textfile	2	TRUE
rs4676494	C	A	C	A	-0.45	0.0106	0.490207	0.52	FALSE	FALSE	FALSE	aNU7xZ	0.0303	0.725	4524	outcome	TRUE	reported	textfile	RPSA	2e-18	0.0513858	exposure	TRUE	reported	5WQQJl	textfile	2	TRUE
rs58971671	A	G	A	G	0.79	0.03	0.122632	0.04	FALSE	FALSE	FALSE	aNU7xZ	0.0889	0.7354	3915	outcome	TRUE	reported	textfile	RPL9	4.8e-08	0.144727	exposure	TRUE	reported	5WQQJl	textfile	2	TRUE
rs61734492	T	G	T	G	-0.53	-0.0819	0.08128	0.92	FALSE	FALSE	FALSE	aNU7xZ	0.0836	0.3272	3680	outcome	TRUE	reported	textfile	RPS9	3.7e-06	0.114531	exposure	TRUE	reported	5WQQJl	textfile	2	TRUE
rs6478778	T	G	T	G	0.55	-0.0097	0.136116	0.1	FALSE	FALSE	FALSE	aNU7xZ	0.0532	0.8559	4524	outcome	TRUE	reported	textfile	RPL12	7.9e-10	0.0894757	exposure	TRUE	reported	5WQQJl	textfile	2	TRUE
rs6800209	A	G	A	G	-0.48	-0.0188	0.045255	0.07	FALSE	FALSE	FALSE	aNU7xZ	0.0643	0.7696	4303	outcome	TRUE	reported	textfile	RPSA	1.8e-06	0.10053	exposure	TRUE	reported	5WQQJl	textfile	2	TRUE
rs6872844	T	A	T	A	-0.2	0.0126	0.339831	0.29	FALSE	TRUE	FALSE	aNU7xZ	0.0357	0.7238	4154	outcome	TRUE	reported	textfile	RPS14	3.1e-05	0.0480078	exposure	TRUE	reported	5WQQJl	textfile	2	TRUE
rs692609	C	A	C	A	-0.21	0.0154	0.22978	0.89	FALSE	FALSE	FALSE	aNU7xZ	0.0936	0.8697	2729	outcome	TRUE	reported	textfile	RPL27	7.7e-05	0.0531168	exposure	TRUE	reported	5WQQJl	textfile	2	TRUE
rs7160493	C	G	C	G	-0.4	-0.0502	0.079472	0.09	FALSE	TRUE	FALSE	aNU7xZ	0.0742	0.4984	3812	outcome	TRUE	reported	textfile	RPL36AL	1.4e-07	0.0759698	exposure	TRUE	reported	5WQQJl	textfile	2	TRUE
rs72699313	C	A	C	A	-0.4	-0.0301	0.06758	0.1	FALSE	FALSE	FALSE	aNU7xZ	0.0634	0.6351	4000	outcome	TRUE	reported	textfile	RPL8	3.8e-08	0.0727286	exposure	TRUE	reported	5WQQJl	textfile	2	TRUE
rs73567692	C	T	C	T	-0.38	-0.0109	0.07053	0.08	FALSE	FALSE	FALSE	aNU7xZ	0.061	0.8587	4303	outcome	TRUE	reported	textfile	RPL7A	1e-06	0.0776836	exposure	TRUE	reported	5WQQJl	textfile	2	TRUE
rs73617860	G	T	G	T	0.26	0.0492	0.271411	0.15	FALSE	FALSE	FALSE	aNU7xZ	0.0472	0.2972	4154	outcome	TRUE	reported	textfile	RPL28	6.9e-06	0.0578195	exposure	TRUE	reported	5WQQJl	textfile	2	TRUE
rs73939921	G	A	G	A	0.46	0.0321	0.060875	0.05	FALSE	FALSE	FALSE	aNU7xZ	0.0782	0.681	4047	outcome	TRUE	reported	textfile	RPS5	5.2e-05	0.11368	exposure	TRUE	reported	5WQQJl	textfile	2	TRUE
rs74659866	A	C	A	C	0.58	0.0781	0.075335	0.04	FALSE	FALSE	FALSE	aNU7xZ	0.0844	0.3552	4050	outcome	TRUE	reported	textfile	RPL12	2.8e-05	0.138453	exposure	TRUE	reported	5WQQJl	textfile	2	TRUE
rs74731984	A	G	A	G	-0.24	0.0122	0.228134	0.3	FALSE	FALSE	FALSE	aNU7xZ	0.0333	0.7147	4524	outcome	TRUE	reported	textfile	RPS23	2.2e-07	0.0463178	exposure	TRUE	reported	5WQQJl	textfile	2	TRUE
rs7648	G	C	G	C	-0.28	0.0218	0.487243	0.46	FALSE	TRUE	TRUE	aNU7xZ	0.0303	0.4717	4524	outcome	TRUE	reported	textfile	UBA52	2.6e-14	0.0367607	exposure	TRUE	reported	5WQQJl	textfile	2	FALSE
rs773126	A	T	A	T	0.4	-0.0248	0.369721	0.4	FALSE	TRUE	FALSE	aNU7xZ	0.0417	0.5527	4154	outcome	TRUE	reported	textfile	RPS26	1.1e-06	0.0820875	exposure	TRUE	reported	5WQQJl	textfile	2	TRUE
rs77745910	T	C	T	C	-0.28	-0.0466	0.103382	0.15	FALSE	FALSE	FALSE	aNU7xZ	0.0472	0.3228	4154	outcome	TRUE	reported	textfile	RPS23	8.5e-06	0.0628904	exposure	TRUE	reported	5WQQJl	textfile	2	TRUE
rs78384777	T	A	T	A	0.86	-0.0137	0.034176	0.05	FALSE	TRUE	FALSE	aNU7xZ	0.071	0.847	4303	outcome	TRUE	reported	textfile	RPL9	1.7e-10	0.134664	exposure	TRUE	reported	5WQQJl	textfile	2	TRUE
Colon transverse-Longevity 90p
SNP	effect_allele.exposure	other_allele.exposure	effect_allele.outcome	other_allele.outcome	beta.exposure	beta.outcome	eaf.exposure	eaf.outcome	remove	palindromic	ambiguous	id.outcome	se.outcome	pval.outcome	samplesize.outcome	outcome	mr_keep.outcome	pval_origin.outcome	data_source.outcome	gene.exposure	pval.exposure	se.exposure	exposure	mr_keep.exposure	pval_origin.exposure	id.exposure	data_source.exposure	action	mr_keep
rs10025155	C	T	C	T	-0.35	-0.0003	0.199151	0.17	FALSE	FALSE	FALSE	grszlh	0.0251	0.9916	11615	outcome	TRUE	reported	textfile	RPL9	2.2e-11	0.0523005	exposure	TRUE	reported	u8eegK	textfile	2	TRUE
rs10123714	T	C	T	C	0.11	0.0227	0.448057	0.51	FALSE	FALSE	FALSE	grszlh	0.0195	0.2442	11615	outcome	TRUE	reported	textfile	RPS6	2.4e-05	0.0260416	exposure	TRUE	reported	u8eegK	textfile	2	TRUE
rs1057232	A	G	A	G	-0.35	0.0368	0.41518	0.55	FALSE	FALSE	FALSE	grszlh	0.0198	0.0636	11075	outcome	TRUE	reported	textfile	RPS28	2e-45	0.0247434	exposure	TRUE	reported	u8eegK	textfile	2	TRUE
rs10947550	A	G	A	G	-0.22	-0.0031	0.431366	0.55	FALSE	FALSE	FALSE	grszlh	0.0195	0.8755	11615	outcome	TRUE	reported	textfile	RPL10A	2.8e-18	0.0252315	exposure	TRUE	reported	u8eegK	textfile	2	TRUE
rs111709089	T	C	T	C	0.56	0.0029	0.05405	0.06	FALSE	FALSE	FALSE	grszlh	0.0487	0.952	11050	outcome	TRUE	reported	textfile	RPL9	1.6e-07	0.106857	exposure	TRUE	reported	u8eegK	textfile	2	TRUE
rs11171821	A	G	A	G	-0.39	0.0447	0.140566	0.19	FALSE	FALSE	FALSE	grszlh	0.0329	0.1746	8695	outcome	TRUE	reported	textfile	RPS26	2.8e-05	0.0930976	exposure	TRUE	reported	u8eegK	textfile	2	TRUE
rs11171864	A	G	A	G	-0.43	0.0702	0.064444	0.09	FALSE	FALSE	FALSE	grszlh	0.0404	0.08231	10588	outcome	TRUE	reported	textfile	RPS26	0.00012	0.111801	exposure	TRUE	reported	u8eegK	textfile	2	TRUE
rs111922843	C	T	C	T	-0.16	-0.0417	0.173277	0.14	FALSE	FALSE	FALSE	grszlh	0.0297	0.161	11615	outcome	TRUE	reported	textfile	RPL18A	1.8e-05	0.0373103	exposure	TRUE	reported	u8eegK	textfile	2	TRUE
rs112060121	G	T	G	T	0.48	0.0821	0.013251	0.02	FALSE	FALSE	FALSE	grszlh	0.0824	0.319	9740	outcome	TRUE	reported	textfile	RPL12	8.6e-06	0.107873	exposure	TRUE	reported	u8eegK	textfile	2	TRUE
rs112275455	T	C	T	C	0.48	-0.0059	0.061072	0.07	FALSE	FALSE	FALSE	grszlh	0.0398	0.883	11615	outcome	TRUE	reported	textfile	RPL9	9.7e-10	0.0785049	exposure	TRUE	reported	u8eegK	textfile	2	TRUE
rs112932537	T	A	T	A	-0.31	0.0062	0.157269	0.2	FALSE	TRUE	FALSE	grszlh	0.0245	0.8001	11615	outcome	TRUE	reported	textfile	RPL9	1.5e-07	0.0590188	exposure	TRUE	reported	u8eegK	textfile	2	TRUE
rs1131017	G	C	G	C	-1.1	0.0149	0.444089	0.42	FALSE	TRUE	TRUE	grszlh	0.0195	0.4468	11615	outcome	TRUE	reported	textfile	RPS26	3.9e-168	0.0398004	exposure	TRUE	reported	u8eegK	textfile	2	FALSE
rs113225496	C	T	C	T	0.26	-0.0348	0.089457	0.08	FALSE	FALSE	FALSE	grszlh	0.0415	0.4019	10510	outcome	TRUE	reported	textfile	RPS28	3e-07	0.0507471	exposure	TRUE	reported	u8eegK	textfile	2	TRUE
rs115176625	G	A	G	A	0.67	-0.069	0.012389	0.01	FALSE	FALSE	FALSE	grszlh	0.0999	0.4893	8860	outcome	TRUE	reported	textfile	RPL9	1.7e-06	0.139987	exposure	TRUE	reported	u8eegK	textfile	2	TRUE
rs11553984	T	C	T	C	-0.48	-0.0374	0.025239	0.03	FALSE	FALSE	FALSE	grszlh	0.0681	0.5825	10146	outcome	TRUE	reported	textfile	RPL10A	2.5e-09	0.0805172	exposure	TRUE	reported	u8eegK	textfile	2	TRUE
rs11558965	T	G	T	G	-0.36	0.0087	0.051874	0.07	FALSE	FALSE	FALSE	grszlh	0.0499	0.8617	10202	outcome	TRUE	reported	textfile	RPS7	5.3e-10	0.0579714	exposure	TRUE	reported	u8eegK	textfile	2	TRUE
rs11631963	C	T	C	T	0.16	-0.0012	0.439662	0.62	FALSE	FALSE	FALSE	grszlh	0.0197	0.9532	11615	outcome	TRUE	reported	textfile	RPS17	1.8e-13	0.0217307	exposure	TRUE	reported	u8eegK	textfile	2	TRUE
rs116547500	C	G	C	G	-0.41	-0.0102	0.01699	0.03	FALSE	TRUE	FALSE	grszlh	0.0645	0.8739	11209	outcome	TRUE	reported	textfile	RPSA	2.2e-07	0.0791263	exposure	TRUE	reported	u8eegK	textfile	2	TRUE
rs11669559	G	C	G	C	-0.16	0.0581	0.141111	0.13	FALSE	TRUE	FALSE	grszlh	0.0312	0.06286	11075	outcome	TRUE	reported	textfile	RPS28	2.2e-05	0.0377042	exposure	TRUE	reported	u8eegK	textfile	2	TRUE
rs11716905	T	G	T	G	-0.11	-0.0215	0.222268	0.3	FALSE	FALSE	FALSE	grszlh	0.0303	0.4788	9820	outcome	TRUE	reported	textfile	RPL14	2.9e-05	0.0263084	exposure	TRUE	reported	u8eegK	textfile	2	TRUE
rs117312206	G	A	G	A	-0.23	0.0516	0.0443	0.07	FALSE	FALSE	FALSE	grszlh	0.0406	0.204	11075	outcome	TRUE	reported	textfile	RPL28	1.1e-05	0.0523141	exposure	TRUE	reported	u8eegK	textfile	2	TRUE
rs117396149	A	G	A	G	0.66	-0.033	0.026158	0.03	FALSE	FALSE	FALSE	grszlh	0.089	0.7109	7385	outcome	TRUE	reported	textfile	RPS26	8.7e-05	0.168185	exposure	TRUE	reported	u8eegK	textfile	2	TRUE
rs11743578	T	C	T	C	0.4	0.0296	0.082268	0.09	FALSE	FALSE	FALSE	grszlh	0.0341	0.3859	11615	outcome	TRUE	reported	textfile	RPS23	4.1e-14	0.0529256	exposure	TRUE	reported	u8eegK	textfile	2	TRUE
rs117650704	G	A	G	A	-0.44	-0.0072	0.02106	0.03	FALSE	FALSE	FALSE	grszlh	0.0692	0.9171	10711	outcome	TRUE	reported	textfile	RPL36	5.8e-07	0.0880394	exposure	TRUE	reported	u8eegK	textfile	2	TRUE
rs118065356	T	C	T	C	0.37	-0.0802	0.037927	0.06	FALSE	FALSE	FALSE	grszlh	0.0462	0.08215	11050	outcome	TRUE	reported	textfile	RPS6	2.5e-09	0.0620654	exposure	TRUE	reported	u8eegK	textfile	2	TRUE
rs11828705	G	A	G	A	0.16	-0.003	0.162085	0.07	FALSE	FALSE	FALSE	grszlh	0.0377	0.9372	11615	outcome	TRUE	reported	textfile	RPS13	2.9e-05	0.0382667	exposure	TRUE	reported	u8eegK	textfile	2	TRUE
rs12323544	C	T	C	T	0.16	0.0258	0.446052	0.37	FALSE	FALSE	FALSE	grszlh	0.0199	0.1957	11615	outcome	TRUE	reported	textfile	RPL36AL	7.2e-05	0.0403065	exposure	TRUE	reported	u8eegK	textfile	2	TRUE
rs12433192	G	A	G	A	0.18	-0.009	0.243174	0.19	FALSE	FALSE	FALSE	grszlh	0.0246	0.7146	11615	outcome	TRUE	reported	textfile	RPL36AL	8.8e-05	0.0459008	exposure	TRUE	reported	u8eegK	textfile	2	TRUE
rs12526562	T	C	T	C	-0.15	0.0169	0.047321	0.18	FALSE	FALSE	FALSE	grszlh	0.0273	0.5356	11050	outcome	TRUE	reported	textfile	RPL10A	8.6e-06	0.0337103	exposure	TRUE	reported	u8eegK	textfile	2	TRUE
rs12639862	A	G	A	G	0.45	-0.0245	0.113113	0.03	FALSE	FALSE	FALSE	grszlh	0.0558	0.6602	11202	outcome	TRUE	reported	textfile	RPL9	6.4e-06	0.099718	exposure	TRUE	reported	u8eegK	textfile	2	TRUE
rs12831884	G	T	G	T	0.69	0.0652	0.044103	0.06	FALSE	FALSE	FALSE	grszlh	0.0394	0.09778	11615	outcome	TRUE	reported	textfile	RPS26	5.9e-07	0.138153	exposure	TRUE	reported	u8eegK	textfile	2	TRUE
rs13089215	C	T	C	T	-0.15	0.0164	0.456131	0.68	FALSE	FALSE	FALSE	grszlh	0.0214	0.4438	11615	outcome	TRUE	reported	textfile	RPL14	4.2e-09	0.0255271	exposure	TRUE	reported	u8eegK	textfile	2	TRUE
rs1384256	A	G	A	G	0.21	-0.0082	0.499423	0.48	FALSE	FALSE	FALSE	grszlh	0.0192	0.6684	11615	outcome	TRUE	reported	textfile	RPS23	1.3e-09	0.0346112	exposure	TRUE	reported	u8eegK	textfile	2	TRUE
rs139976763	A	C	A	C	-0.35	0.0714	0.011382	0.03	FALSE	FALSE	FALSE	grszlh	0.064	0.264	10662	outcome	TRUE	reported	textfile	RPL28	8e-06	0.0783842	exposure	TRUE	reported	u8eegK	textfile	2	TRUE
rs140685568	C	G	C	G	0.2	-0.0399	0.085877	0.04	FALSE	TRUE	FALSE	grszlh	0.0512	0.4357	11615	outcome	TRUE	reported	textfile	RPL7L1	5.1e-05	0.0493706	exposure	TRUE	reported	u8eegK	textfile	2	TRUE
rs140913132	G	C	G	C	0.92	0.1738	0.00738	0.01	FALSE	TRUE	FALSE	grszlh	0.1167	0.1362	7664	outcome	TRUE	reported	textfile	RPL9	9.5e-05	0.235715	exposure	TRUE	reported	u8eegK	textfile	2	TRUE
rs144131441	C	G	C	G	-0.79	-0.0377	0.049579	0.07	FALSE	TRUE	FALSE	grszlh	0.0421	0.3702	11615	outcome	TRUE	reported	textfile	RPS26	6.2e-10	0.127723	exposure	TRUE	reported	u8eegK	textfile	2	TRUE
rs145044106	C	G	C	G	-0.64	0.1198	0.008986	0.02	FALSE	TRUE	FALSE	grszlh	0.083	0.1487	10305	outcome	TRUE	reported	textfile	RPS18	6.2e-10	0.103472	exposure	TRUE	reported	u8eegK	textfile	2	TRUE
rs145711688	T	C	T	C	0.43	0.0393	0.046306	0.06	FALSE	FALSE	FALSE	grszlh	0.0454	0.3864	11615	outcome	TRUE	reported	textfile	RPS16	1.9e-06	0.0902645	exposure	TRUE	reported	u8eegK	textfile	2	TRUE
rs147447230	T	C	T	C	-0.21	0.0805	0.089972	0.14	FALSE	FALSE	FALSE	grszlh	0.0322	0.01241	11050	outcome	TRUE	reported	textfile	RPL12	2.2e-06	0.0443588	exposure	TRUE	reported	u8eegK	textfile	2	TRUE
rs149154981	A	C	A	C	-0.48	0.0243	0.040156	0.02	FALSE	FALSE	FALSE	grszlh	0.0975	0.8035	8958	outcome	TRUE	reported	textfile	RPL37A	1.2e-09	0.0789442	exposure	TRUE	reported	u8eegK	textfile	2	TRUE
rs16832210	G	A	G	A	-0.3	-0.012	0.10612	0.13	FALSE	FALSE	FALSE	grszlh	0.0305	0.6928	11050	outcome	TRUE	reported	textfile	RPS8	9.3e-16	0.0373331	exposure	TRUE	reported	u8eegK	textfile	2	TRUE
rs16933837	G	A	G	A	0.49	-0.0189	0.058219	0.03	FALSE	FALSE	FALSE	grszlh	0.074	0.7988	10613	outcome	TRUE	reported	textfile	RPS13	1.1e-19	0.0539732	exposure	TRUE	reported	u8eegK	textfile	2	TRUE
rs17523547	G	A	G	A	-0.46	-0.0636	0.066432	0.03	FALSE	FALSE	FALSE	grszlh	0.0861	0.4597	9843	outcome	TRUE	reported	textfile	RPL18A	5.7e-11	0.070214	exposure	TRUE	reported	u8eegK	textfile	2	TRUE
rs17700376	G	A	G	A	-0.31	0.0032	0.296294	0.36	FALSE	FALSE	FALSE	grszlh	0.0205	0.8775	11075	outcome	TRUE	reported	textfile	RPL28	2.8e-29	0.0275967	exposure	TRUE	reported	u8eegK	textfile	2	TRUE
rs185485211	G	T	G	T	-0.6	0.0282	0.009941	0.02	FALSE	FALSE	FALSE	grszlh	0.0856	0.7419	9019	outcome	TRUE	reported	textfile	RPL27A	1.5e-06	0.124708	exposure	TRUE	reported	u8eegK	textfile	2	TRUE
rs1873249	G	A	G	A	-0.11	-0.0087	0.416129	0.5	FALSE	FALSE	FALSE	grszlh	0.0191	0.6492	11615	outcome	TRUE	reported	textfile	RPS10	7.8e-05	0.0278448	exposure	TRUE	reported	u8eegK	textfile	2	TRUE
rs1952013	G	C	G	C	0.51	-0.0268	0.45647	0.23	FALSE	TRUE	TRUE	grszlh	0.0229	0.2425	11615	outcome	TRUE	reported	textfile	RPL36AL	3.1e-44	0.0365564	exposure	TRUE	reported	u8eegK	textfile	2	FALSE
rs2063634	G	A	G	A	0.13	0.0033	0.226721	0.76	FALSE	FALSE	FALSE	grszlh	0.0225	0.8845	11615	outcome	TRUE	reported	textfile	RPSA	5.9e-05	0.0323643	exposure	TRUE	reported	u8eegK	textfile	2	TRUE
rs2066789	A	G	A	G	-0.18	0.0135	0.381728	0.63	FALSE	FALSE	FALSE	grszlh	0.0234	0.5653	11050	outcome	TRUE	reported	textfile	RPL9	3.2e-05	0.0432823	exposure	TRUE	reported	u8eegK	textfile	2	TRUE
rs2069414	A	C	A	C	-0.71	-0.0528	0.041972	0.06	FALSE	FALSE	FALSE	grszlh	0.0424	0.213	10892	outcome	TRUE	reported	textfile	RPS26	1.4e-06	0.14715	exposure	TRUE	reported	u8eegK	textfile	2	TRUE
rs2093197	G	T	G	T	0.12	0.0304	0.178514	0.27	FALSE	FALSE	FALSE	grszlh	0.0282	0.2809	11050	outcome	TRUE	reported	textfile	RPS8	3.5e-06	0.0258673	exposure	TRUE	reported	u8eegK	textfile	2	TRUE
rs210157	T	C	T	C	-0.12	0.0053	0.391636	0.36	FALSE	FALSE	FALSE	grszlh	0.0199	0.7918	11615	outcome	TRUE	reported	textfile	RPS18	8.5e-05	0.0305355	exposure	TRUE	reported	u8eegK	textfile	2	TRUE
rs2240315	T	A	T	A	0.14	0.0034	0.225027	0.16	FALSE	TRUE	FALSE	grszlh	0.0271	0.9017	11615	outcome	TRUE	reported	textfile	RPLP0	2.5e-06	0.0297358	exposure	TRUE	reported	u8eegK	textfile	2	TRUE
rs2257055	C	A	C	A	0.13	-0.0105	0.388318	0.5	FALSE	FALSE	FALSE	grszlh	0.0199	0.5969	11615	outcome	TRUE	reported	textfile	RPL12	5.6e-05	0.0322656	exposure	TRUE	reported	u8eegK	textfile	2	TRUE
rs2271953	C	A	C	A	-0.25	-0.0278	0.196767	0.1	FALSE	FALSE	FALSE	grszlh	0.0324	0.3908	11615	outcome	TRUE	reported	textfile	RPS11	1.2e-12	0.0351846	exposure	TRUE	reported	u8eegK	textfile	2	TRUE
rs2280370	G	T	G	T	-0.29	0.0115	0.199482	0.19	FALSE	FALSE	FALSE	grszlh	0.0247	0.6427	11615	outcome	TRUE	reported	textfile	RPL13	8.5e-18	0.0337498	exposure	TRUE	reported	u8eegK	textfile	2	TRUE
rs2361796	G	T	G	T	-0.18	-0.0024	0.256075	0.31	FALSE	FALSE	FALSE	grszlh	0.0245	0.9204	10463	outcome	TRUE	reported	textfile	RPS9	1.7e-06	0.0376084	exposure	TRUE	reported	u8eegK	textfile	2	TRUE
rs2371188	A	T	A	T	0.34	0.0012	0.1411	0.17	FALSE	TRUE	FALSE	grszlh	0.0259	0.9622	11615	outcome	TRUE	reported	textfile	RPS26	6.5e-05	0.0851302	exposure	TRUE	reported	u8eegK	textfile	2	TRUE
rs255772	G	C	G	C	0.22	-0.1551	0.231723	0.12	FALSE	TRUE	FALSE	grszlh	0.0518	0.002741	7085	outcome	TRUE	reported	textfile	RPS9	3.5e-06	0.0474234	exposure	TRUE	reported	u8eegK	textfile	2	TRUE
rs2687967	A	G	A	G	-0.75	0.0276	0.351855	0.7	FALSE	FALSE	FALSE	grszlh	0.0208	0.1841	11615	outcome	TRUE	reported	textfile	RPL9	5.8e-110	0.0336628	exposure	TRUE	reported	u8eegK	textfile	2	TRUE
rs2748241	T	C	T	C	-0.2	-0.0022	0.455131	0.3	FALSE	FALSE	FALSE	grszlh	0.0215	0.9176	11050	outcome	TRUE	reported	textfile	RPS14	2.2e-11	0.029886	exposure	TRUE	reported	u8eegK	textfile	2	TRUE
rs2770995	G	C	G	C	-0.23	0.0234	0.151982	0.04	FALSE	TRUE	FALSE	grszlh	0.0549	0.6704	11050	outcome	TRUE	reported	textfile	RACK1	3.3e-07	0.0450499	exposure	TRUE	reported	u8eegK	textfile	2	TRUE
rs2954658	T	C	T	C	-0.24	-0.0128	0.422902	0.51	FALSE	FALSE	FALSE	grszlh	0.0204	0.5307	11050	outcome	TRUE	reported	textfile	RPL8	1.7e-27	0.0220901	exposure	TRUE	reported	u8eegK	textfile	2	TRUE
rs35198968	A	G	A	G	-0.24	0.0626	0.051093	0.07	FALSE	FALSE	FALSE	grszlh	0.0552	0.2573	8130	outcome	TRUE	reported	textfile	RPL13	5.3e-05	0.0593767	exposure	TRUE	reported	u8eegK	textfile	2	TRUE
rs35366046	C	T	C	T	-0.18	0.0437	0.135531	0.19	FALSE	FALSE	FALSE	grszlh	0.0243	0.07189	11615	outcome	TRUE	reported	textfile	RPS18	1e-05	0.04075	exposure	TRUE	reported	u8eegK	textfile	2	TRUE
rs3738	C	A	C	A	-0.48	-0.0045	0.32623	0.31	FALSE	FALSE	FALSE	grszlh	0.0208	0.8299	11615	outcome	TRUE	reported	textfile	RPS23	3.7e-53	0.0312761	exposure	TRUE	reported	u8eegK	textfile	2	TRUE
rs3740253	T	C	T	C	0.2	-0.0243	0.476134	0.61	FALSE	FALSE	FALSE	grszlh	0.02	0.2244	11615	outcome	TRUE	reported	textfile	RPS24	6.1e-15	0.0256349	exposure	TRUE	reported	u8eegK	textfile	2	TRUE
rs3745409	G	C	G	C	0.36	-0.0404	0.066214	0.06	FALSE	TRUE	FALSE	grszlh	0.062	0.5147	8130	outcome	TRUE	reported	textfile	RPS9	8e-09	0.0624084	exposure	TRUE	reported	u8eegK	textfile	2	TRUE
rs3772147	A	G	A	G	-0.34	0.0248	0.183906	0.28	FALSE	FALSE	FALSE	grszlh	0.0215	0.2498	11615	outcome	TRUE	reported	textfile	RPSA	4.4e-32	0.0288382	exposure	TRUE	reported	u8eegK	textfile	2	TRUE
rs4417323	G	C	G	C	0.33	0.0404	0.188984	0.25	FALSE	TRUE	FALSE	grszlh	0.0312	0.1949	10510	outcome	TRUE	reported	textfile	RPS26	3.6e-05	0.0798692	exposure	TRUE	reported	u8eegK	textfile	2	TRUE
rs45583031	T	C	T	C	0.26	0.0206	0.04566	0.06	FALSE	FALSE	FALSE	grszlh	0.0426	0.6293	11615	outcome	TRUE	reported	textfile	RPL36	7.7e-08	0.0483809	exposure	TRUE	reported	u8eegK	textfile	2	TRUE
rs4684919	C	G	C	G	0.082	-0.0057	0.310388	0.31	FALSE	TRUE	FALSE	grszlh	0.0216	0.7909	11050	outcome	TRUE	reported	textfile	RPL32	6.7e-05	0.0205684	exposure	TRUE	reported	u8eegK	textfile	2	TRUE
rs4759218	T	C	T	C	-0.48	0.0451	0.210201	0.94	FALSE	FALSE	FALSE	grszlh	0.0457	0.3243	11615	outcome	TRUE	reported	textfile	RPS26	2.2e-05	0.113113	exposure	TRUE	reported	u8eegK	textfile	2	TRUE
rs571606	G	A	G	A	-0.19	0.0578	0.094873	0.12	FALSE	FALSE	FALSE	grszlh	0.0307	0.05953	11615	outcome	TRUE	reported	textfile	RPL12	3.5e-05	0.0459134	exposure	TRUE	reported	u8eegK	textfile	2	TRUE
rs57263506	G	A	G	A	-0.3	-0.0234	0.05293	0.06	FALSE	FALSE	FALSE	grszlh	0.0513	0.6488	11307	outcome	TRUE	reported	textfile	RPL29	7.7e-10	0.0487726	exposure	TRUE	reported	u8eegK	textfile	2	TRUE
rs592275	C	T	C	T	-0.19	0.0206	0.171713	0.94	FALSE	FALSE	FALSE	grszlh	0.0425	0.6279	11615	outcome	TRUE	reported	textfile	RPL14	1.4e-05	0.0437399	exposure	TRUE	reported	u8eegK	textfile	2	TRUE
rs61875926	G	C	G	C	-0.24	0.0148	0.08157	0.1	FALSE	TRUE	FALSE	grszlh	0.0369	0.6889	11050	outcome	TRUE	reported	textfile	RPL27A	5.9e-08	0.0442657	exposure	TRUE	reported	u8eegK	textfile	2	TRUE
rs61879695	A	G	A	G	0.12	-0.0222	0.205924	0.22	FALSE	FALSE	FALSE	grszlh	0.0238	0.3508	11615	outcome	TRUE	reported	textfile	RPS13	2.9e-05	0.0287	exposure	TRUE	reported	u8eegK	textfile	2	TRUE
rs62128216	T	C	T	C	0.24	-0.0272	0.05293	0.07	FALSE	FALSE	FALSE	grszlh	0.0502	0.5882	10510	outcome	TRUE	reported	textfile	RPL28	1.6e-05	0.055627	exposure	TRUE	reported	u8eegK	textfile	2	TRUE
rs62246115	C	T	C	T	0.08	-0.0236	0.356368	0.36	FALSE	FALSE	FALSE	grszlh	0.0214	0.2716	11615	outcome	TRUE	reported	textfile	RPL32	8.6e-06	0.0179788	exposure	TRUE	reported	u8eegK	textfile	2	TRUE
rs6442338	A	G	A	G	0.12	-0.0095	0.182668	0.11	FALSE	FALSE	FALSE	grszlh	0.0315	0.763	11615	outcome	TRUE	reported	textfile	RPL32	9.1e-06	0.0270421	exposure	TRUE	reported	u8eegK	textfile	2	TRUE
rs6475324	A	G	A	G	-0.27	-0.0433	0.180992	0.09	FALSE	FALSE	FALSE	grszlh	0.0346	0.2111	11615	outcome	TRUE	reported	textfile	RPS6	3.9e-14	0.035694	exposure	TRUE	reported	u8eegK	textfile	2	TRUE
rs651601	C	T	C	T	0.5	0.0065	0.454519	0.34	FALSE	FALSE	FALSE	grszlh	0.0205	0.7502	11615	outcome	TRUE	reported	textfile	RPS16	2.7e-49	0.0338781	exposure	TRUE	reported	u8eegK	textfile	2	TRUE
rs6531731	C	G	C	G	-0.24	0.0003	0.362308	0.37	FALSE	TRUE	FALSE	grszlh	0.02	0.9898	11615	outcome	TRUE	reported	textfile	RPL9	1.4e-07	0.0455819	exposure	TRUE	reported	u8eegK	textfile	2	TRUE
rs6572611	G	A	G	A	0.23	0.0057	0.154254	0.18	FALSE	FALSE	FALSE	grszlh	0.0341	0.8663	9820	outcome	TRUE	reported	textfile	RPL36AL	3.4e-06	0.0495151	exposure	TRUE	reported	u8eegK	textfile	2	TRUE
rs6599104	C	A	C	A	-0.42	0.1391	0.025881	0.98	FALSE	FALSE	FALSE	grszlh	0.1128	0.2174	7479	outcome	TRUE	reported	textfile	RPL14	1.2e-05	0.0959432	exposure	TRUE	reported	u8eegK	textfile	2	TRUE
rs6766779	T	A	T	A	0.15	0.0079	0.157917	0.04	FALSE	TRUE	FALSE	grszlh	0.0485	0.8708	11615	outcome	TRUE	reported	textfile	RPL14	0.00015	0.0395667	exposure	TRUE	reported	u8eegK	textfile	2	TRUE
rs67769144	C	T	C	T	0.1	-0.014	0.149901	0.22	FALSE	FALSE	FALSE	grszlh	0.0235	0.5505	11615	outcome	TRUE	reported	textfile	RPS20	1.4e-05	0.023021	exposure	TRUE	reported	u8eegK	textfile	2	TRUE
rs6810375	A	G	A	G	0.17	0.0018	0.211366	0.11	FALSE	FALSE	FALSE	grszlh	0.0313	0.9543	11615	outcome	TRUE	reported	textfile	RPL14	2.7e-05	0.0405013	exposure	TRUE	reported	u8eegK	textfile	2	TRUE
rs7033779	A	T	A	T	0.36	0.0103	0.377313	0.41	FALSE	TRUE	FALSE	grszlh	0.0195	0.5969	11615	outcome	TRUE	reported	textfile	RPL12	6.7e-44	0.0259068	exposure	TRUE	reported	u8eegK	textfile	2	TRUE
rs7040019	A	G	A	G	0.14	-0.0191	0.49654	0.52	FALSE	FALSE	FALSE	grszlh	0.0215	0.3734	11050	outcome	TRUE	reported	textfile	RPL12	6.9e-06	0.0311336	exposure	TRUE	reported	u8eegK	textfile	2	TRUE
rs71365431	C	T	C	T	-0.39	0.0204	0.299681	0.38	FALSE	FALSE	FALSE	grszlh	0.0197	0.301	11615	outcome	TRUE	reported	textfile	RPS9	1.7e-34	0.0318392	exposure	TRUE	reported	u8eegK	textfile	2	TRUE
rs7160493	C	G	C	G	-0.36	0.0264	0.079472	0.09	FALSE	TRUE	FALSE	grszlh	0.0447	0.5546	10510	outcome	TRUE	reported	textfile	RPL36AL	1.7e-07	0.0688407	exposure	TRUE	reported	u8eegK	textfile	2	TRUE
rs7253433	A	G	A	G	0.12	-0.0401	0.382612	0.32	FALSE	FALSE	FALSE	grszlh	0.0211	0.05774	11615	outcome	TRUE	reported	textfile	RPS5	2.6e-05	0.0285311	exposure	TRUE	reported	u8eegK	textfile	2	TRUE
rs72642275	T	C	T	C	-0.43	0.0977	0.041404	0.02	FALSE	FALSE	FALSE	grszlh	0.0685	0.1542	11019	outcome	TRUE	reported	textfile	RPS24	1.5e-08	0.0759507	exposure	TRUE	reported	u8eegK	textfile	2	TRUE
rs72699315	G	A	G	A	-0.17	-0.0625	0.068173	0.1	FALSE	FALSE	FALSE	grszlh	0.0393	0.112	10510	outcome	TRUE	reported	textfile	RPL8	0.00014	0.0446409	exposure	TRUE	reported	u8eegK	textfile	2	TRUE
rs73040091	C	G	C	G	0.35	0.0752	0.063055	0.07	FALSE	TRUE	FALSE	grszlh	0.0402	0.06137	11615	outcome	TRUE	reported	textfile	RPS16	9.8e-07	0.0714926	exposure	TRUE	reported	u8eegK	textfile	2	TRUE
rs73125289	C	G	C	G	0.63	0.0261	0.053353	0.08	FALSE	TRUE	FALSE	grszlh	0.0496	0.5982	10202	outcome	TRUE	reported	textfile	RPS26	5.2e-08	0.115717	exposure	TRUE	reported	u8eegK	textfile	2	TRUE
rs734379	G	A	G	A	-0.27	0.0343	0.433983	0.41	FALSE	FALSE	FALSE	grszlh	0.0196	0.08054	11615	outcome	TRUE	reported	textfile	RPS5	1.1e-24	0.0263233	exposure	TRUE	reported	u8eegK	textfile	2	TRUE
rs7404644	C	G	C	G	-0.16	0.0398	0.175602	0.14	FALSE	TRUE	FALSE	grszlh	0.0338	0.2393	10510	outcome	TRUE	reported	textfile	RPL13	9.1e-05	0.040885	exposure	TRUE	reported	u8eegK	textfile	2	TRUE
rs74391990	G	C	G	C	-0.28	-0.1392	0.045145	0.02	FALSE	TRUE	FALSE	grszlh	0.0779	0.07409	9200	outcome	TRUE	reported	textfile	RPS2	3.3e-07	0.0548433	exposure	TRUE	reported	u8eegK	textfile	2	TRUE
rs74664063	C	T	C	T	-0.31	0.0503	0.099758	0.04	FALSE	FALSE	FALSE	grszlh	0.0512	0.3258	11432	outcome	TRUE	reported	textfile	RPS3A	9.5e-11	0.0478787	exposure	TRUE	reported	u8eegK	textfile	2	TRUE
rs7479101	G	A	G	A	0.14	0.0045	0.321246	0.65	FALSE	FALSE	FALSE	grszlh	0.0207	0.8261	11615	outcome	TRUE	reported	textfile	RPLP2	5.7e-08	0.0257923	exposure	TRUE	reported	u8eegK	textfile	2	TRUE
rs7484392	C	T	C	T	-0.61	-0.0395	0.048611	0.05	FALSE	FALSE	FALSE	grszlh	0.0743	0.5948	7923	outcome	TRUE	reported	textfile	RPS26	2.2e-05	0.143747	exposure	TRUE	reported	u8eegK	textfile	2	TRUE
rs75135474	A	G	A	G	0.17	-0.0218	0.086345	0.12	FALSE	FALSE	FALSE	grszlh	0.0304	0.4726	11615	outcome	TRUE	reported	textfile	RPS7	1.4e-05	0.0391357	exposure	TRUE	reported	u8eegK	textfile	2	TRUE
rs753391	A	G	A	G	0.066	0.0237	0.492781	0.47	FALSE	FALSE	FALSE	grszlh	0.0194	0.2221	11615	outcome	TRUE	reported	textfile	RPL5	5.8e-05	0.0164146	exposure	TRUE	reported	u8eegK	textfile	2	TRUE
rs75797005	T	C	T	C	0.19	-0.1016	0.062954	0.08	FALSE	FALSE	FALSE	grszlh	0.0377	0.007016	11615	outcome	TRUE	reported	textfile	RPL7L1	7.9e-05	0.0481328	exposure	TRUE	reported	u8eegK	textfile	2	TRUE
rs76086839	A	G	A	G	0.34	0.0085	0.036823	0.04	FALSE	FALSE	FALSE	grszlh	0.0661	0.8981	10662	outcome	TRUE	reported	textfile	UBA52	4.8e-06	0.0743438	exposure	TRUE	reported	u8eegK	textfile	2	TRUE
rs7634072	A	G	A	G	-0.11	-0.0126	0.248003	0.46	FALSE	FALSE	FALSE	grszlh	0.0193	0.5135	11615	outcome	TRUE	reported	textfile	RPL14	9.8e-06	0.0248782	exposure	TRUE	reported	u8eegK	textfile	2	TRUE
rs769440	C	G	C	G	0.096	0.0013	0.0193051	0.5	FALSE	TRUE	TRUE	grszlh	0.0191	0.9467	11615	outcome	TRUE	reported	textfile	FAU	6.6e-07	0.0193051	exposure	TRUE	reported	u8eegK	textfile	2	FALSE
rs77001608	T	C	T	C	-0.35	0.133	0.012868	0.02	FALSE	FALSE	FALSE	grszlh	0.1325	0.3155	6124	outcome	TRUE	reported	textfile	RPL36	4.5e-05	0.0857804	exposure	TRUE	reported	u8eegK	textfile	2	TRUE
rs773126	A	T	A	T	0.25	0.0003	0.369721	0.41	FALSE	TRUE	FALSE	grszlh	0.0266	0.9921	10202	outcome	TRUE	reported	textfile	RPS26	0.00011	0.0646428	exposure	TRUE	reported	u8eegK	textfile	2	TRUE
rs77745910	T	C	T	C	-0.25	-0.0251	0.103382	0.15	FALSE	FALSE	FALSE	grszlh	0.0295	0.3946	11050	outcome	TRUE	reported	textfile	RPS23	4.4e-06	0.054448	exposure	TRUE	reported	u8eegK	textfile	2	TRUE
rs78454682	A	G	A	G	-0.18	-0.03	0.092104	0.12	FALSE	FALSE	FALSE	grszlh	0.0309	0.3309	11615	outcome	TRUE	reported	textfile	RPS10	0.00011	0.0465428	exposure	TRUE	reported	u8eegK	textfile	2	TRUE
rs7856923	T	A	T	A	0.38	0.0174	0.144561	0.1	FALSE	TRUE	FALSE	grszlh	0.0313	0.5779	11615	outcome	TRUE	reported	textfile	RPL12	9e-19	0.042953	exposure	TRUE	reported	u8eegK	textfile	2	TRUE
rs79017989	A	G	A	G	-0.34	0.1039	0.076747	0.02	FALSE	FALSE	FALSE	grszlh	0.1041	0.3184	7373	outcome	TRUE	reported	textfile	RPS14	2.2e-06	0.0718189	exposure	TRUE	reported	u8eegK	textfile	2	TRUE
rs79592126	A	G	A	G	-0.72	0.075	0.01517	0.01	FALSE	FALSE	FALSE	grszlh	0.091	0.4102	9843	outcome	TRUE	reported	textfile	RPS18	3.3e-11	0.108556	exposure	TRUE	reported	u8eegK	textfile	2	TRUE
rs79594160	T	C	T	C	-0.2	0.0729	0.022607	0.03	FALSE	FALSE	FALSE	grszlh	0.0574	0.2044	10867	outcome	TRUE	reported	textfile	RPS20	3.7e-05	0.0484795	exposure	TRUE	reported	u8eegK	textfile	2	TRUE
rs8110371	C	A	C	A	-0.18	-0.0182	0.362936	0.57	FALSE	FALSE	FALSE	grszlh	0.0202	0.3693	11615	outcome	TRUE	reported	textfile	UBA52	1.6e-11	0.0267121	exposure	TRUE	reported	u8eegK	textfile	2	TRUE
rs8192696	T	C	T	C	-0.11	-0.0572	0.238367	0.21	FALSE	FALSE	FALSE	grszlh	0.0246	0.02006	11050	outcome	TRUE	reported	textfile	RPS25	2.8e-06	0.0234793	exposure	TRUE	reported	u8eegK	textfile	2	TRUE
rs9277932	G	T	G	T	-0.13	-0.0096	0.354832	0.55	FALSE	FALSE	FALSE	grszlh	0.021	0.6467	11432	outcome	TRUE	reported	textfile	RPS18	2.3e-05	0.0307069	exposure	TRUE	reported	u8eegK	textfile	2	TRUE
rs9296144	T	G	T	G	-0.13	-0.034	0.203688	0.83	FALSE	FALSE	FALSE	grszlh	0.0263	0.1965	11615	outcome	TRUE	reported	textfile	RPL10A	2.9e-05	0.0310917	exposure	TRUE	reported	u8eegK	textfile	2	TRUE
rs9394166	C	G	C	G	0.18	-0.0272	0.367242	0.38	FALSE	TRUE	FALSE	grszlh	0.0199	0.1706	11615	outcome	TRUE	reported	textfile	RPS18	2.5e-08	0.032297	exposure	TRUE	reported	u8eegK	textfile	2	TRUE
rs9462150	G	A	G	A	0.11	-0.0063	0.426424	0.35	FALSE	FALSE	FALSE	grszlh	0.0209	0.7638	11050	outcome	TRUE	reported	textfile	RPL10A	2.2e-05	0.0259216	exposure	TRUE	reported	u8eegK	textfile	2	TRUE
rs9462861	C	T	C	T	-0.33	-0.0697	0.018388	0.04	FALSE	FALSE	FALSE	grszlh	0.0605	0.2491	10461	outcome	TRUE	reported	textfile	RPL7L1	2.7e-05	0.0786201	exposure	TRUE	reported	u8eegK	textfile	2	TRUE
rs9471935	A	G	A	G	-0.23	-0.0194	0.173051	0.23	FALSE	FALSE	FALSE	grszlh	0.0234	0.4059	11615	outcome	TRUE	reported	textfile	RPL7L1	2.2e-13	0.031352	exposure	TRUE	reported	u8eegK	textfile	2	TRUE
rs9839675	G	A	G	A	-0.13	-0.0404	0.245842	0.18	FALSE	FALSE	FALSE	grszlh	0.025	0.1058	11615	outcome	TRUE	reported	textfile	RPSA	7.9e-05	0.032933	exposure	TRUE	reported	u8eegK	textfile	2	TRUE
rs9859185	G	A	G	A	-0.29	-0.0797	0.05288	0.99	FALSE	FALSE	FALSE	grszlh	0.1194	0.5044	6878	outcome	TRUE	reported	textfile	RPL14	3.6e-05	0.0701881	exposure	TRUE	reported	u8eegK	textfile	2	TRUE
Colon transverse-Longevity 99p
SNP	effect_allele.exposure	other_allele.exposure	effect_allele.outcome	other_allele.outcome	beta.exposure	beta.outcome	eaf.exposure	eaf.outcome	remove	palindromic	ambiguous	id.outcome	se.outcome	pval.outcome	samplesize.outcome	outcome	mr_keep.outcome	pval_origin.outcome	data_source.outcome	gene.exposure	pval.exposure	se.exposure	exposure	mr_keep.exposure	pval_origin.exposure	id.exposure	data_source.exposure	action	mr_keep
rs10025155	C	T	C	T	-0.35	0.0111	0.199151	0.18	FALSE	FALSE	FALSE	luk8p9	0.0393	0.7769	4524	outcome	TRUE	reported	textfile	RPL9	2.2e-11	0.0523005	exposure	TRUE	reported	u8eegK	textfile	2	TRUE
rs10123714	T	C	T	C	0.11	0.0581	0.448057	0.51	FALSE	FALSE	FALSE	luk8p9	0.0305	0.05663	4524	outcome	TRUE	reported	textfile	RPS6	2.4e-05	0.0260416	exposure	TRUE	reported	u8eegK	textfile	2	TRUE
rs1057232	A	G	A	G	-0.35	0.0167	0.41518	0.55	FALSE	FALSE	FALSE	luk8p9	0.0303	0.5814	4524	outcome	TRUE	reported	textfile	RPS28	2e-45	0.0247434	exposure	TRUE	reported	u8eegK	textfile	2	TRUE
rs10947550	A	G	A	G	-0.22	-0.0416	0.431366	0.53	FALSE	FALSE	FALSE	luk8p9	0.0304	0.172	4524	outcome	TRUE	reported	textfile	RPL10A	2.8e-18	0.0252315	exposure	TRUE	reported	u8eegK	textfile	2	TRUE
rs111709089	T	C	T	C	0.56	0.0665	0.05405	0.06	FALSE	FALSE	FALSE	luk8p9	0.0845	0.431	3680	outcome	TRUE	reported	textfile	RPL9	1.6e-07	0.106857	exposure	TRUE	reported	u8eegK	textfile	2	TRUE
rs11171821	A	G	A	G	-0.39	0.0023	0.140566	0.19	FALSE	FALSE	FALSE	luk8p9	0.0476	0.9607	4117	outcome	TRUE	reported	textfile	RPS26	2.8e-05	0.0930976	exposure	TRUE	reported	u8eegK	textfile	2	TRUE
rs11171864	A	G	A	G	-0.43	-0.0748	0.064444	0.1	FALSE	FALSE	FALSE	luk8p9	0.0651	0.2503	3933	outcome	TRUE	reported	textfile	RPS26	0.00012	0.111801	exposure	TRUE	reported	u8eegK	textfile	2	TRUE
rs111922843	C	T	C	T	-0.16	-0.0382	0.173277	0.15	FALSE	FALSE	FALSE	luk8p9	0.0452	0.3974	4524	outcome	TRUE	reported	textfile	RPL18A	1.8e-05	0.0373103	exposure	TRUE	reported	u8eegK	textfile	2	TRUE
rs112060121	G	T	G	T	0.48	0.0571	0.013251	0.03	FALSE	FALSE	FALSE	luk8p9	0.1316	0.6641	3322	outcome	TRUE	reported	textfile	RPL12	8.6e-06	0.107873	exposure	TRUE	reported	u8eegK	textfile	2	TRUE
rs112275455	T	C	T	C	0.48	0.0931	0.061072	0.06	FALSE	FALSE	FALSE	luk8p9	0.0642	0.1469	4303	outcome	TRUE	reported	textfile	RPL9	9.7e-10	0.0785049	exposure	TRUE	reported	u8eegK	textfile	2	TRUE
rs112932537	T	A	T	A	-0.31	-0.045	0.157269	0.21	FALSE	TRUE	FALSE	luk8p9	0.0385	0.2423	4524	outcome	TRUE	reported	textfile	RPL9	1.5e-07	0.0590188	exposure	TRUE	reported	u8eegK	textfile	2	TRUE
rs1131017	G	C	G	C	-1.1	0.022	0.444089	0.42	FALSE	TRUE	TRUE	luk8p9	0.0304	0.47	4524	outcome	TRUE	reported	textfile	RPS26	3.9e-168	0.0398004	exposure	TRUE	reported	u8eegK	textfile	2	FALSE
rs113225496	C	T	C	T	0.26	-0.0459	0.089457	0.08	FALSE	FALSE	FALSE	luk8p9	0.0726	0.5278	3933	outcome	TRUE	reported	textfile	RPS28	3e-07	0.0507471	exposure	TRUE	reported	u8eegK	textfile	2	TRUE
rs115176625	G	A	G	A	0.67	-0.0737	0.012389	0.02	FALSE	FALSE	FALSE	luk8p9	0.1655	0.656	2779	outcome	TRUE	reported	textfile	RPL9	1.7e-06	0.139987	exposure	TRUE	reported	u8eegK	textfile	2	TRUE
rs11553984	T	C	T	C	-0.48	0.0403	0.025239	0.03	FALSE	FALSE	FALSE	luk8p9	0.1083	0.7101	3545	outcome	TRUE	reported	textfile	RPL10A	2.5e-09	0.0805172	exposure	TRUE	reported	u8eegK	textfile	2	TRUE
rs11558965	T	G	T	G	-0.36	-0.0201	0.051874	0.07	FALSE	FALSE	FALSE	luk8p9	0.0828	0.8078	3680	outcome	TRUE	reported	textfile	RPS7	5.3e-10	0.0579714	exposure	TRUE	reported	u8eegK	textfile	2	TRUE
rs11631963	C	T	C	T	0.16	0.0199	0.439662	0.62	FALSE	FALSE	FALSE	luk8p9	0.0308	0.5169	4524	outcome	TRUE	reported	textfile	RPS17	1.8e-13	0.0217307	exposure	TRUE	reported	u8eegK	textfile	2	TRUE
rs116547500	C	G	C	G	-0.41	0.0523	0.01699	0.03	FALSE	TRUE	FALSE	luk8p9	0.1116	0.6396	3692	outcome	TRUE	reported	textfile	RPSA	2.2e-07	0.0791263	exposure	TRUE	reported	u8eegK	textfile	2	TRUE
rs11669559	G	C	G	C	-0.16	0.0601	0.141111	0.13	FALSE	TRUE	FALSE	luk8p9	0.0483	0.2134	4524	outcome	TRUE	reported	textfile	RPS28	2.2e-05	0.0377042	exposure	TRUE	reported	u8eegK	textfile	2	TRUE
rs11716905	T	G	T	G	-0.11	-0.0402	0.222268	0.3	FALSE	FALSE	FALSE	luk8p9	0.0474	0.3955	4033	outcome	TRUE	reported	textfile	RPL14	2.9e-05	0.0263084	exposure	TRUE	reported	u8eegK	textfile	2	TRUE
rs117312206	G	A	G	A	-0.23	0.1066	0.0443	0.07	FALSE	FALSE	FALSE	luk8p9	0.0657	0.1047	4303	outcome	TRUE	reported	textfile	RPL28	1.1e-05	0.0523141	exposure	TRUE	reported	u8eegK	textfile	2	TRUE
rs117396149	A	G	A	G	0.66	-0.0933	0.026158	0.03	FALSE	FALSE	FALSE	luk8p9	0.1555	0.5484	2371	outcome	TRUE	reported	textfile	RPS26	8.7e-05	0.168185	exposure	TRUE	reported	u8eegK	textfile	2	TRUE
rs11743578	T	C	T	C	0.4	0.0991	0.082268	0.09	FALSE	FALSE	FALSE	luk8p9	0.0531	0.06211	4524	outcome	TRUE	reported	textfile	RPS23	4.1e-14	0.0529256	exposure	TRUE	reported	u8eegK	textfile	2	TRUE
rs117650704	G	A	G	A	-0.44	-0.0364	0.02106	0.03	FALSE	FALSE	FALSE	luk8p9	0.1128	0.7468	3692	outcome	TRUE	reported	textfile	RPL36	5.8e-07	0.0880394	exposure	TRUE	reported	u8eegK	textfile	2	TRUE
rs118065356	T	C	T	C	0.37	0.0056	0.037927	0.06	FALSE	FALSE	FALSE	luk8p9	0.0781	0.9429	3933	outcome	TRUE	reported	textfile	RPS6	2.5e-09	0.0620654	exposure	TRUE	reported	u8eegK	textfile	2	TRUE
rs11828705	G	A	G	A	0.16	0.0314	0.162085	0.08	FALSE	FALSE	FALSE	luk8p9	0.0585	0.5913	4303	outcome	TRUE	reported	textfile	RPS13	2.9e-05	0.0382667	exposure	TRUE	reported	u8eegK	textfile	2	TRUE
rs12323544	C	T	C	T	0.16	0.0472	0.446052	0.37	FALSE	FALSE	FALSE	luk8p9	0.0308	0.1258	4524	outcome	TRUE	reported	textfile	RPL36AL	7.2e-05	0.0403065	exposure	TRUE	reported	u8eegK	textfile	2	TRUE
rs12433192	G	A	G	A	0.18	-0.0069	0.243174	0.19	FALSE	FALSE	FALSE	luk8p9	0.0389	0.8592	4524	outcome	TRUE	reported	textfile	RPL36AL	8.8e-05	0.0459008	exposure	TRUE	reported	u8eegK	textfile	2	TRUE
rs12526562	T	C	T	C	-0.15	0.0138	0.047321	0.18	FALSE	FALSE	FALSE	luk8p9	0.0447	0.758	4154	outcome	TRUE	reported	textfile	RPL10A	8.6e-06	0.0337103	exposure	TRUE	reported	u8eegK	textfile	2	TRUE
rs12639862	A	G	A	G	0.45	0.0334	0.113113	0.03	FALSE	FALSE	FALSE	luk8p9	0.0895	0.7093	3915	outcome	TRUE	reported	textfile	RPL9	6.4e-06	0.099718	exposure	TRUE	reported	u8eegK	textfile	2	TRUE
rs12831884	G	T	G	T	0.69	0.0118	0.044103	0.06	FALSE	FALSE	FALSE	luk8p9	0.0629	0.8516	4303	outcome	TRUE	reported	textfile	RPS26	5.9e-07	0.138153	exposure	TRUE	reported	u8eegK	textfile	2	TRUE
rs13089215	C	T	C	T	-0.15	0.0002	0.456131	0.68	FALSE	FALSE	FALSE	luk8p9	0.0329	0.9946	4524	outcome	TRUE	reported	textfile	RPL14	4.2e-09	0.0255271	exposure	TRUE	reported	u8eegK	textfile	2	TRUE
rs1384256	A	G	A	G	0.21	-0.0095	0.499423	0.47	FALSE	FALSE	FALSE	luk8p9	0.0298	0.7488	4524	outcome	TRUE	reported	textfile	RPS23	1.3e-09	0.0346112	exposure	TRUE	reported	u8eegK	textfile	2	TRUE
rs139976763	A	C	A	C	-0.35	0.1517	0.011382	0.03	FALSE	FALSE	FALSE	luk8p9	0.1044	0.1462	3692	outcome	TRUE	reported	textfile	RPL28	8e-06	0.0783842	exposure	TRUE	reported	u8eegK	textfile	2	TRUE
rs140685568	C	G	C	G	0.2	0.0221	0.085877	0.04	FALSE	TRUE	FALSE	luk8p9	0.0823	0.7882	4050	outcome	TRUE	reported	textfile	RPL7L1	5.1e-05	0.0493706	exposure	TRUE	reported	u8eegK	textfile	2	TRUE
rs144131441	C	G	C	G	-0.79	0.0085	0.049579	0.07	FALSE	TRUE	FALSE	luk8p9	0.0687	0.901	4303	outcome	TRUE	reported	textfile	RPS26	6.2e-10	0.127723	exposure	TRUE	reported	u8eegK	textfile	2	TRUE
rs145044106	C	G	C	G	-0.64	-0.0619	0.008986	0.03	FALSE	TRUE	FALSE	luk8p9	0.1269	0.6259	3692	outcome	TRUE	reported	textfile	RPS18	6.2e-10	0.103472	exposure	TRUE	reported	u8eegK	textfile	2	TRUE
rs145711688	T	C	T	C	0.43	0.0402	0.046306	0.05	FALSE	FALSE	FALSE	luk8p9	0.0751	0.5924	4050	outcome	TRUE	reported	textfile	RPS16	1.9e-06	0.0902645	exposure	TRUE	reported	u8eegK	textfile	2	TRUE
rs147447230	T	C	T	C	-0.21	0.07	0.089972	0.15	FALSE	FALSE	FALSE	luk8p9	0.0519	0.1776	4154	outcome	TRUE	reported	textfile	RPL12	2.2e-06	0.0443588	exposure	TRUE	reported	u8eegK	textfile	2	TRUE
rs149154981	A	C	A	C	-0.48	0.1691	0.040156	0.02	FALSE	FALSE	FALSE	luk8p9	0.1535	0.2706	2667	outcome	TRUE	reported	textfile	RPL37A	1.2e-09	0.0789442	exposure	TRUE	reported	u8eegK	textfile	2	TRUE
rs16832210	G	A	G	A	-0.3	-0.0192	0.10612	0.12	FALSE	FALSE	FALSE	luk8p9	0.0507	0.7051	4154	outcome	TRUE	reported	textfile	RPS8	9.3e-16	0.0373331	exposure	TRUE	reported	u8eegK	textfile	2	TRUE
rs16933837	G	A	G	A	0.49	0.0171	0.058219	0.03	FALSE	FALSE	FALSE	luk8p9	0.1187	0.8852	3199	outcome	TRUE	reported	textfile	RPS13	1.1e-19	0.0539732	exposure	TRUE	reported	u8eegK	textfile	2	TRUE
rs17523547	G	A	G	A	-0.46	-0.1266	0.066432	0.04	FALSE	FALSE	FALSE	luk8p9	0.121	0.2953	3692	outcome	TRUE	reported	textfile	RPL18A	5.7e-11	0.070214	exposure	TRUE	reported	u8eegK	textfile	2	TRUE
rs17700376	G	A	G	A	-0.31	0.0228	0.296294	0.36	FALSE	FALSE	FALSE	luk8p9	0.031	0.4617	4524	outcome	TRUE	reported	textfile	RPL28	2.8e-29	0.0275967	exposure	TRUE	reported	u8eegK	textfile	2	TRUE
rs185485211	G	T	G	T	-0.6	-0.0111	0.009941	0.02	FALSE	FALSE	FALSE	luk8p9	0.1352	0.9347	3272	outcome	TRUE	reported	textfile	RPL27A	1.5e-06	0.124708	exposure	TRUE	reported	u8eegK	textfile	2	TRUE
rs1873249	G	A	G	A	-0.11	-0.0146	0.416129	0.51	FALSE	FALSE	FALSE	luk8p9	0.0299	0.6265	4524	outcome	TRUE	reported	textfile	RPS10	7.8e-05	0.0278448	exposure	TRUE	reported	u8eegK	textfile	2	TRUE
rs1952013	G	C	G	C	0.51	0.0283	0.45647	0.23	FALSE	TRUE	TRUE	luk8p9	0.0357	0.4268	4524	outcome	TRUE	reported	textfile	RPL36AL	3.1e-44	0.0365564	exposure	TRUE	reported	u8eegK	textfile	2	FALSE
rs2063634	G	A	G	A	0.13	-0.0188	0.226721	0.76	FALSE	FALSE	FALSE	luk8p9	0.0358	0.5997	4524	outcome	TRUE	reported	textfile	RPSA	5.9e-05	0.0323643	exposure	TRUE	reported	u8eegK	textfile	2	TRUE
rs2066789	A	G	A	G	-0.18	-0.0388	0.381728	0.63	FALSE	FALSE	FALSE	luk8p9	0.0374	0.3001	4154	outcome	TRUE	reported	textfile	RPL9	3.2e-05	0.0432823	exposure	TRUE	reported	u8eegK	textfile	2	TRUE
rs2069414	A	C	A	C	-0.71	-0.0588	0.041972	0.06	FALSE	FALSE	FALSE	luk8p9	0.0667	0.3781	4303	outcome	TRUE	reported	textfile	RPS26	1.4e-06	0.14715	exposure	TRUE	reported	u8eegK	textfile	2	TRUE
rs2093197	G	T	G	T	0.12	0.0203	0.178514	0.27	FALSE	FALSE	FALSE	luk8p9	0.0459	0.6576	4154	outcome	TRUE	reported	textfile	RPS8	3.5e-06	0.0258673	exposure	TRUE	reported	u8eegK	textfile	2	TRUE
rs210157	T	C	T	C	-0.12	-0.0117	0.391636	0.35	FALSE	FALSE	FALSE	luk8p9	0.0313	0.7094	4524	outcome	TRUE	reported	textfile	RPS18	8.5e-05	0.0305355	exposure	TRUE	reported	u8eegK	textfile	2	TRUE
rs2240315	T	A	T	A	0.14	-0.0696	0.225027	0.18	FALSE	TRUE	FALSE	luk8p9	0.0411	0.09012	4524	outcome	TRUE	reported	textfile	RPLP0	2.5e-06	0.0297358	exposure	TRUE	reported	u8eegK	textfile	2	TRUE
rs2257055	C	A	C	A	0.13	0.0096	0.388318	0.5	FALSE	FALSE	FALSE	luk8p9	0.0306	0.7526	4524	outcome	TRUE	reported	textfile	RPL12	5.6e-05	0.0322656	exposure	TRUE	reported	u8eegK	textfile	2	TRUE
rs2271953	C	A	C	A	-0.25	-0.0277	0.196767	0.1	FALSE	FALSE	FALSE	luk8p9	0.0501	0.581	4524	outcome	TRUE	reported	textfile	RPS11	1.2e-12	0.0351846	exposure	TRUE	reported	u8eegK	textfile	2	TRUE
rs2280370	G	T	G	T	-0.29	-0.0223	0.199482	0.2	FALSE	FALSE	FALSE	luk8p9	0.0383	0.5607	4524	outcome	TRUE	reported	textfile	RPL13	8.5e-18	0.0337498	exposure	TRUE	reported	u8eegK	textfile	2	TRUE
rs2361796	G	T	G	T	-0.18	0.0041	0.256075	0.31	FALSE	FALSE	FALSE	luk8p9	0.0368	0.9116	4403	outcome	TRUE	reported	textfile	RPS9	1.7e-06	0.0376084	exposure	TRUE	reported	u8eegK	textfile	2	TRUE
rs2371188	A	T	A	T	0.34	0.0129	0.1411	0.17	FALSE	TRUE	FALSE	luk8p9	0.0404	0.7493	4524	outcome	TRUE	reported	textfile	RPS26	6.5e-05	0.0851302	exposure	TRUE	reported	u8eegK	textfile	2	TRUE
rs255772	G	C	G	C	0.22	-0.1654	0.231723	0.13	FALSE	TRUE	FALSE	luk8p9	0.0795	0.03738	3260	outcome	TRUE	reported	textfile	RPS9	3.5e-06	0.0474234	exposure	TRUE	reported	u8eegK	textfile	2	TRUE
rs2687967	A	G	A	G	-0.75	0.041	0.351855	0.71	FALSE	FALSE	FALSE	luk8p9	0.0328	0.2119	4524	outcome	TRUE	reported	textfile	RPL9	5.8e-110	0.0336628	exposure	TRUE	reported	u8eegK	textfile	2	TRUE
rs2748241	T	C	T	C	-0.2	0.0003	0.455131	0.29	FALSE	FALSE	FALSE	luk8p9	0.0352	0.9933	4154	outcome	TRUE	reported	textfile	RPS14	2.2e-11	0.029886	exposure	TRUE	reported	u8eegK	textfile	2	TRUE
rs2770995	G	C	G	C	-0.23	0.0111	0.151982	0.04	FALSE	TRUE	FALSE	luk8p9	0.0991	0.9108	3680	outcome	TRUE	reported	textfile	RACK1	3.3e-07	0.0450499	exposure	TRUE	reported	u8eegK	textfile	2	TRUE
rs2954658	T	C	T	C	-0.24	-0.0187	0.422902	0.51	FALSE	FALSE	FALSE	luk8p9	0.0329	0.5703	4154	outcome	TRUE	reported	textfile	RPL8	1.7e-27	0.0220901	exposure	TRUE	reported	u8eegK	textfile	2	TRUE
rs35198968	A	G	A	G	-0.24	0.1037	0.051093	0.07	FALSE	FALSE	FALSE	luk8p9	0.0821	0.2069	3680	outcome	TRUE	reported	textfile	RPL13	5.3e-05	0.0593767	exposure	TRUE	reported	u8eegK	textfile	2	TRUE
rs35366046	C	T	C	T	-0.18	-0.0045	0.135531	0.19	FALSE	FALSE	FALSE	luk8p9	0.038	0.9057	4524	outcome	TRUE	reported	textfile	RPS18	1e-05	0.04075	exposure	TRUE	reported	u8eegK	textfile	2	TRUE
rs3738	C	A	C	A	-0.48	-0.0055	0.32623	0.32	FALSE	FALSE	FALSE	luk8p9	0.0321	0.8642	4524	outcome	TRUE	reported	textfile	RPS23	3.7e-53	0.0312761	exposure	TRUE	reported	u8eegK	textfile	2	TRUE
rs3740253	T	C	T	C	0.2	-0.0385	0.476134	0.6	FALSE	FALSE	FALSE	luk8p9	0.0313	0.2178	4524	outcome	TRUE	reported	textfile	RPS24	6.1e-15	0.0256349	exposure	TRUE	reported	u8eegK	textfile	2	TRUE
rs3745409	G	C	G	C	0.36	-0.0633	0.066214	0.06	FALSE	TRUE	FALSE	luk8p9	0.0984	0.5202	3680	outcome	TRUE	reported	textfile	RPS9	8e-09	0.0624084	exposure	TRUE	reported	u8eegK	textfile	2	TRUE
rs3772147	A	G	A	G	-0.34	0.0308	0.183906	0.29	FALSE	FALSE	FALSE	luk8p9	0.0332	0.3528	4524	outcome	TRUE	reported	textfile	RPSA	4.4e-32	0.0288382	exposure	TRUE	reported	u8eegK	textfile	2	TRUE
rs4417323	G	C	G	C	0.33	0.0856	0.188984	0.25	FALSE	TRUE	FALSE	luk8p9	0.0495	0.08355	4000	outcome	TRUE	reported	textfile	RPS26	3.6e-05	0.0798692	exposure	TRUE	reported	u8eegK	textfile	2	TRUE
rs45583031	T	C	T	C	0.26	0.092	0.04566	0.06	FALSE	FALSE	FALSE	luk8p9	0.0695	0.1859	4303	outcome	TRUE	reported	textfile	RPL36	7.7e-08	0.0483809	exposure	TRUE	reported	u8eegK	textfile	2	TRUE
rs4684919	C	G	C	G	0.082	0.0199	0.310388	0.31	FALSE	TRUE	FALSE	luk8p9	0.0351	0.5714	4154	outcome	TRUE	reported	textfile	RPL32	6.7e-05	0.0205684	exposure	TRUE	reported	u8eegK	textfile	2	TRUE
rs4759218	T	C	T	C	-0.48	0.099	0.210201	0.94	FALSE	FALSE	FALSE	luk8p9	0.0721	0.1698	4050	outcome	TRUE	reported	textfile	RPS26	2.2e-05	0.113113	exposure	TRUE	reported	u8eegK	textfile	2	TRUE
rs571606	G	A	G	A	-0.19	0.1213	0.094873	0.12	FALSE	FALSE	FALSE	luk8p9	0.0469	0.009757	4524	outcome	TRUE	reported	textfile	RPL12	3.5e-05	0.0459134	exposure	TRUE	reported	u8eegK	textfile	2	TRUE
rs57263506	G	A	G	A	-0.3	-0.1252	0.05293	0.05	FALSE	FALSE	FALSE	luk8p9	0.0887	0.158	3557	outcome	TRUE	reported	textfile	RPL29	7.7e-10	0.0487726	exposure	TRUE	reported	u8eegK	textfile	2	TRUE
rs592275	C	T	C	T	-0.19	0.073	0.171713	0.94	FALSE	FALSE	FALSE	luk8p9	0.0698	0.2956	4171	outcome	TRUE	reported	textfile	RPL14	1.4e-05	0.0437399	exposure	TRUE	reported	u8eegK	textfile	2	TRUE
rs61875926	G	C	G	C	-0.24	0.0265	0.08157	0.1	FALSE	TRUE	FALSE	luk8p9	0.0613	0.666	4000	outcome	TRUE	reported	textfile	RPL27A	5.9e-08	0.0442657	exposure	TRUE	reported	u8eegK	textfile	2	TRUE
rs61879695	A	G	A	G	0.12	-0.006	0.205924	0.24	FALSE	FALSE	FALSE	luk8p9	0.0361	0.8681	4524	outcome	TRUE	reported	textfile	RPS13	2.9e-05	0.0287	exposure	TRUE	reported	u8eegK	textfile	2	TRUE
rs62128216	T	C	T	C	0.24	0.0513	0.05293	0.07	FALSE	FALSE	FALSE	luk8p9	0.0848	0.5454	3680	outcome	TRUE	reported	textfile	RPL28	1.6e-05	0.055627	exposure	TRUE	reported	u8eegK	textfile	2	TRUE
rs62246115	C	T	C	T	0.08	-0.0467	0.356368	0.36	FALSE	FALSE	FALSE	luk8p9	0.0334	0.1618	4524	outcome	TRUE	reported	textfile	RPL32	8.6e-06	0.0179788	exposure	TRUE	reported	u8eegK	textfile	2	TRUE
rs6442338	A	G	A	G	0.12	-0.0433	0.182668	0.1	FALSE	FALSE	FALSE	luk8p9	0.0508	0.3941	4524	outcome	TRUE	reported	textfile	RPL32	9.1e-06	0.0270421	exposure	TRUE	reported	u8eegK	textfile	2	TRUE
rs6475324	A	G	A	G	-0.27	-0.0469	0.180992	0.09	FALSE	FALSE	FALSE	luk8p9	0.0559	0.401	4370	outcome	TRUE	reported	textfile	RPS6	3.9e-14	0.035694	exposure	TRUE	reported	u8eegK	textfile	2	TRUE
rs651601	C	T	C	T	0.5	0.0078	0.454519	0.34	FALSE	FALSE	FALSE	luk8p9	0.0317	0.8061	4524	outcome	TRUE	reported	textfile	RPS16	2.7e-49	0.0338781	exposure	TRUE	reported	u8eegK	textfile	2	TRUE
rs6531731	C	G	C	G	-0.24	-0.0198	0.362308	0.36	FALSE	TRUE	FALSE	luk8p9	0.0313	0.5272	4524	outcome	TRUE	reported	textfile	RPL9	1.4e-07	0.0455819	exposure	TRUE	reported	u8eegK	textfile	2	TRUE
rs6572611	G	A	G	A	0.23	-0.0234	0.154254	0.18	FALSE	FALSE	FALSE	luk8p9	0.0517	0.6505	3879	outcome	TRUE	reported	textfile	RPL36AL	3.4e-06	0.0495151	exposure	TRUE	reported	u8eegK	textfile	2	TRUE
rs6599104	C	A	C	A	-0.42	0.0978	0.025881	0.98	FALSE	FALSE	FALSE	luk8p9	0.1662	0.5562	2667	outcome	TRUE	reported	textfile	RPL14	1.2e-05	0.0959432	exposure	TRUE	reported	u8eegK	textfile	2	TRUE
rs6766779	T	A	T	A	0.15	0.0556	0.157917	0.05	FALSE	TRUE	FALSE	luk8p9	0.0797	0.4853	4050	outcome	TRUE	reported	textfile	RPL14	0.00015	0.0395667	exposure	TRUE	reported	u8eegK	textfile	2	TRUE
rs67769144	C	T	C	T	0.1	-0.0445	0.149901	0.23	FALSE	FALSE	FALSE	luk8p9	0.0362	0.2191	4524	outcome	TRUE	reported	textfile	RPS20	1.4e-05	0.023021	exposure	TRUE	reported	u8eegK	textfile	2	TRUE
rs6810375	A	G	A	G	0.17	-0.0058	0.211366	0.11	FALSE	FALSE	FALSE	luk8p9	0.0491	0.906	4524	outcome	TRUE	reported	textfile	RPL14	2.7e-05	0.0405013	exposure	TRUE	reported	u8eegK	textfile	2	TRUE
rs7033779	A	T	A	T	0.36	0.0016	0.377313	0.42	FALSE	TRUE	FALSE	luk8p9	0.0305	0.9582	4524	outcome	TRUE	reported	textfile	RPL12	6.7e-44	0.0259068	exposure	TRUE	reported	u8eegK	textfile	2	TRUE
rs7040019	A	G	A	G	0.14	-0.0305	0.49654	0.52	FALSE	FALSE	FALSE	luk8p9	0.0353	0.3881	4154	outcome	TRUE	reported	textfile	RPL12	6.9e-06	0.0311336	exposure	TRUE	reported	u8eegK	textfile	2	TRUE
rs71365431	C	T	C	T	-0.39	0.0332	0.299681	0.37	FALSE	FALSE	FALSE	luk8p9	0.0313	0.2878	4524	outcome	TRUE	reported	textfile	RPS9	1.7e-34	0.0318392	exposure	TRUE	reported	u8eegK	textfile	2	TRUE
rs7160493	C	G	C	G	-0.36	-0.0502	0.079472	0.09	FALSE	TRUE	FALSE	luk8p9	0.0742	0.4984	3812	outcome	TRUE	reported	textfile	RPL36AL	1.7e-07	0.0688407	exposure	TRUE	reported	u8eegK	textfile	2	TRUE
rs7253433	A	G	A	G	0.12	0.0313	0.382612	0.32	FALSE	FALSE	FALSE	luk8p9	0.0325	0.336	4524	outcome	TRUE	reported	textfile	RPS5	2.6e-05	0.0285311	exposure	TRUE	reported	u8eegK	textfile	2	TRUE
rs72642275	T	C	T	C	-0.43	0.3228	0.041404	0.02	FALSE	FALSE	FALSE	luk8p9	0.1229	0.008658	3322	outcome	TRUE	reported	textfile	RPS24	1.5e-08	0.0759507	exposure	TRUE	reported	u8eegK	textfile	2	TRUE
rs72699315	G	A	G	A	-0.17	-0.0116	0.068173	0.1	FALSE	FALSE	FALSE	luk8p9	0.0637	0.8552	4000	outcome	TRUE	reported	textfile	RPL8	0.00014	0.0446409	exposure	TRUE	reported	u8eegK	textfile	2	TRUE
rs73040091	C	G	C	G	0.35	0.0893	0.063055	0.07	FALSE	TRUE	FALSE	luk8p9	0.0651	0.1701	4303	outcome	TRUE	reported	textfile	RPS16	9.8e-07	0.0714926	exposure	TRUE	reported	u8eegK	textfile	2	TRUE
rs73125289	C	G	C	G	0.63	0.1609	0.053353	0.08	FALSE	TRUE	FALSE	luk8p9	0.0782	0.0398	3680	outcome	TRUE	reported	textfile	RPS26	5.2e-08	0.115717	exposure	TRUE	reported	u8eegK	textfile	2	TRUE
rs734379	G	A	G	A	-0.27	0.0036	0.433983	0.42	FALSE	FALSE	FALSE	luk8p9	0.0309	0.9072	4524	outcome	TRUE	reported	textfile	RPS5	1.1e-24	0.0263233	exposure	TRUE	reported	u8eegK	textfile	2	TRUE
rs7404644	C	G	C	G	-0.16	0.0415	0.175602	0.13	FALSE	TRUE	FALSE	luk8p9	0.0539	0.4411	4000	outcome	TRUE	reported	textfile	RPL13	9.1e-05	0.040885	exposure	TRUE	reported	u8eegK	textfile	2	TRUE
rs74391990	G	C	G	C	-0.28	-0.1362	0.045145	0.02	FALSE	TRUE	FALSE	luk8p9	0.1431	0.3411	2829	outcome	TRUE	reported	textfile	RPS2	3.3e-07	0.0548433	exposure	TRUE	reported	u8eegK	textfile	2	TRUE
rs74664063	C	T	C	T	-0.31	0.011	0.099758	0.04	FALSE	FALSE	FALSE	luk8p9	0.0795	0.8896	3915	outcome	TRUE	reported	textfile	RPS3A	9.5e-11	0.0478787	exposure	TRUE	reported	u8eegK	textfile	2	TRUE
rs7479101	G	A	G	A	0.14	-0.0284	0.321246	0.63	FALSE	FALSE	FALSE	luk8p9	0.0318	0.3728	4524	outcome	TRUE	reported	textfile	RPLP2	5.7e-08	0.0257923	exposure	TRUE	reported	u8eegK	textfile	2	TRUE
rs7484392	C	T	C	T	-0.61	-0.0693	0.048611	0.05	FALSE	FALSE	FALSE	luk8p9	0.1298	0.5932	2594	outcome	TRUE	reported	textfile	RPS26	2.2e-05	0.143747	exposure	TRUE	reported	u8eegK	textfile	2	TRUE
rs75135474	A	G	A	G	0.17	-0.0354	0.086345	0.12	FALSE	FALSE	FALSE	luk8p9	0.0472	0.4534	4524	outcome	TRUE	reported	textfile	RPS7	1.4e-05	0.0391357	exposure	TRUE	reported	u8eegK	textfile	2	TRUE
rs753391	A	G	A	G	0.066	0.0019	0.492781	0.47	FALSE	FALSE	FALSE	luk8p9	0.0301	0.9484	4524	outcome	TRUE	reported	textfile	RPL5	5.8e-05	0.0164146	exposure	TRUE	reported	u8eegK	textfile	2	TRUE
rs75797005	T	C	T	C	0.19	-0.0091	0.062954	0.08	FALSE	FALSE	FALSE	luk8p9	0.0593	0.8776	4370	outcome	TRUE	reported	textfile	RPL7L1	7.9e-05	0.0481328	exposure	TRUE	reported	u8eegK	textfile	2	TRUE
rs76086839	A	G	A	G	0.34	0.0038	0.036823	0.04	FALSE	FALSE	FALSE	luk8p9	0.1017	0.9702	3915	outcome	TRUE	reported	textfile	UBA52	4.8e-06	0.0743438	exposure	TRUE	reported	u8eegK	textfile	2	TRUE
rs7634072	A	G	A	G	-0.11	0.0163	0.248003	0.45	FALSE	FALSE	FALSE	luk8p9	0.0301	0.5894	4524	outcome	TRUE	reported	textfile	RPL14	9.8e-06	0.0248782	exposure	TRUE	reported	u8eegK	textfile	2	TRUE
rs769440	C	G	C	G	0.096	0.0086	0.0193051	0.5	FALSE	TRUE	TRUE	luk8p9	0.03	0.775	4524	outcome	TRUE	reported	textfile	FAU	6.6e-07	0.0193051	exposure	TRUE	reported	u8eegK	textfile	2	FALSE
rs773126	A	T	A	T	0.25	-0.0248	0.369721	0.4	FALSE	TRUE	FALSE	luk8p9	0.0417	0.5527	4154	outcome	TRUE	reported	textfile	RPS26	0.00011	0.0646428	exposure	TRUE	reported	u8eegK	textfile	2	TRUE
rs77745910	T	C	T	C	-0.25	-0.0466	0.103382	0.15	FALSE	FALSE	FALSE	luk8p9	0.0472	0.3228	4154	outcome	TRUE	reported	textfile	RPS23	4.4e-06	0.054448	exposure	TRUE	reported	u8eegK	textfile	2	TRUE
rs78454682	A	G	A	G	-0.18	-0.0647	0.092104	0.12	FALSE	FALSE	FALSE	luk8p9	0.0484	0.181	4524	outcome	TRUE	reported	textfile	RPS10	0.00011	0.0465428	exposure	TRUE	reported	u8eegK	textfile	2	TRUE
rs7856923	T	A	T	A	0.38	-0.0257	0.144561	0.11	FALSE	TRUE	FALSE	luk8p9	0.049	0.6004	4524	outcome	TRUE	reported	textfile	RPL12	9e-19	0.042953	exposure	TRUE	reported	u8eegK	textfile	2	TRUE
rs79592126	A	G	A	G	-0.72	0.1992	0.01517	0.02	FALSE	FALSE	FALSE	luk8p9	0.1763	0.2584	2829	outcome	TRUE	reported	textfile	RPS18	3.3e-11	0.108556	exposure	TRUE	reported	u8eegK	textfile	2	TRUE
rs79594160	T	C	T	C	-0.2	-0.0608	0.022607	0.03	FALSE	FALSE	FALSE	luk8p9	0.0988	0.5381	3545	outcome	TRUE	reported	textfile	RPS20	3.7e-05	0.0484795	exposure	TRUE	reported	u8eegK	textfile	2	TRUE
rs8110371	C	A	C	A	-0.18	-0.0274	0.362936	0.56	FALSE	FALSE	FALSE	luk8p9	0.0316	0.3858	4524	outcome	TRUE	reported	textfile	UBA52	1.6e-11	0.0267121	exposure	TRUE	reported	u8eegK	textfile	2	TRUE
rs8192696	T	C	T	C	-0.11	-0.0474	0.238367	0.21	FALSE	FALSE	FALSE	luk8p9	0.0397	0.2321	4154	outcome	TRUE	reported	textfile	RPS25	2.8e-06	0.0234793	exposure	TRUE	reported	u8eegK	textfile	2	TRUE
rs9277932	G	T	G	T	-0.13	-0.0661	0.354832	0.57	FALSE	FALSE	FALSE	luk8p9	0.0337	0.04989	4524	outcome	TRUE	reported	textfile	RPS18	2.3e-05	0.0307069	exposure	TRUE	reported	u8eegK	textfile	2	TRUE
rs9296144	T	G	T	G	-0.13	-0.0478	0.203688	0.81	FALSE	FALSE	FALSE	luk8p9	0.0399	0.2305	4524	outcome	TRUE	reported	textfile	RPL10A	2.9e-05	0.0310917	exposure	TRUE	reported	u8eegK	textfile	2	TRUE
rs9394166	C	G	C	G	0.18	-0.0359	0.367242	0.38	FALSE	TRUE	FALSE	luk8p9	0.0309	0.246	4524	outcome	TRUE	reported	textfile	RPS18	2.5e-08	0.032297	exposure	TRUE	reported	u8eegK	textfile	2	TRUE
rs9462150	G	A	G	A	0.11	-0.0268	0.426424	0.36	FALSE	FALSE	FALSE	luk8p9	0.0342	0.4336	4154	outcome	TRUE	reported	textfile	RPL10A	2.2e-05	0.0259216	exposure	TRUE	reported	u8eegK	textfile	2	TRUE
rs9462861	C	T	C	T	-0.33	0.0301	0.018388	0.03	FALSE	FALSE	FALSE	luk8p9	0.1089	0.7824	3545	outcome	TRUE	reported	textfile	RPL7L1	2.7e-05	0.0786201	exposure	TRUE	reported	u8eegK	textfile	2	TRUE
rs9471935	A	G	A	G	-0.23	-0.0129	0.173051	0.23	FALSE	FALSE	FALSE	luk8p9	0.0363	0.723	4524	outcome	TRUE	reported	textfile	RPL7L1	2.2e-13	0.031352	exposure	TRUE	reported	u8eegK	textfile	2	TRUE
rs9839675	G	A	G	A	-0.13	-0.0314	0.245842	0.19	FALSE	FALSE	FALSE	luk8p9	0.0389	0.4196	4524	outcome	TRUE	reported	textfile	RPSA	7.9e-05	0.032933	exposure	TRUE	reported	u8eegK	textfile	2	TRUE
Brain cortex-Longevity 90p
SNP	effect_allele.exposure	other_allele.exposure	effect_allele.outcome	other_allele.outcome	beta.exposure	beta.outcome	eaf.exposure	eaf.outcome	remove	palindromic	ambiguous	id.outcome	se.outcome	pval.outcome	samplesize.outcome	outcome	mr_keep.outcome	pval_origin.outcome	data_source.outcome	gene.exposure	pval.exposure	se.exposure	exposure	mr_keep.exposure	pval_origin.exposure	id.exposure	data_source.exposure	action	mr_keep
rs10025155	C	T	C	T	-0.39	-0.0003	0.199151	0.17	FALSE	FALSE	FALSE	YBtn6w	0.0251	0.9916	11615	outcome	TRUE	reported	textfile	RPL9	1.7e-07	0.120763	exposure	TRUE	reported	xrRifv	textfile	2	TRUE
rs10042896	A	G	A	G	0.36	-0.008	0.47224	0.47	FALSE	FALSE	FALSE	YBtn6w	0.0193	0.6801	11615	outcome	TRUE	reported	textfile	RPS23	1.3e-07	0.109795	exposure	TRUE	reported	xrRifv	textfile	2	TRUE
rs10426111	C	T	C	T	-0.21	-0.0146	0.341218	0.66	FALSE	FALSE	FALSE	YBtn6w	0.022	0.5079	11050	outcome	TRUE	reported	textfile	RPS28	1.2e-05	0.0883248	exposure	TRUE	reported	xrRifv	textfile	2	TRUE
rs1057232	A	G	A	G	-0.4	0.0368	0.41518	0.55	FALSE	FALSE	FALSE	YBtn6w	0.0198	0.0636	11075	outcome	TRUE	reported	textfile	RPS28	4.2e-23	0.0506386	exposure	TRUE	reported	xrRifv	textfile	2	TRUE
rs10987651	A	G	A	G	0.56	0.0147	0.091187	0.1	FALSE	FALSE	FALSE	YBtn6w	0.0315	0.641	11615	outcome	TRUE	reported	textfile	RPL12	1.8e-11	0.118609	exposure	TRUE	reported	xrRifv	textfile	2	TRUE
rs11171705	G	A	G	A	0.69	0.0285	0.070294	0.07	FALSE	FALSE	FALSE	YBtn6w	0.0389	0.4636	11615	outcome	TRUE	reported	textfile	RPS26	1.6e-05	0.298127	exposure	TRUE	reported	xrRifv	textfile	2	TRUE
rs111940206	A	G	A	G	0.4	-0.0965	0.014714	0.04	FALSE	FALSE	FALSE	YBtn6w	0.0667	0.1479	10231	outcome	TRUE	reported	textfile	RPS20	5.4e-05	0.196309	exposure	TRUE	reported	xrRifv	textfile	2	TRUE
rs1131017	G	C	G	C	-1.1	0.0149	0.444089	0.42	FALSE	TRUE	TRUE	YBtn6w	0.0195	0.4468	11615	outcome	TRUE	reported	textfile	RPS26	2.8e-80	0.0648052	exposure	TRUE	reported	xrRifv	textfile	2	FALSE
rs1150797	A	G	A	G	-0.21	-0.0237	0.181838	0.24	FALSE	FALSE	FALSE	YBtn6w	0.0227	0.2978	11615	outcome	TRUE	reported	textfile	RPL7L1	7.5e-08	0.0621529	exposure	TRUE	reported	xrRifv	textfile	2	TRUE
rs11553984	T	C	T	C	-0.87	-0.0374	0.025239	0.03	FALSE	FALSE	FALSE	YBtn6w	0.0681	0.5825	10146	outcome	TRUE	reported	textfile	RPL10A	5.3e-10	0.206653	exposure	TRUE	reported	xrRifv	textfile	2	TRUE
rs11750053	A	C	A	C	-0.46	0.0047	0.24042	0.31	FALSE	FALSE	FALSE	YBtn6w	0.0216	0.8273	11615	outcome	TRUE	reported	textfile	RPS23	4.1e-09	0.118553	exposure	TRUE	reported	xrRifv	textfile	2	TRUE
rs12525930	C	T	C	T	-0.33	0.0025	0.443721	0.55	FALSE	FALSE	FALSE	YBtn6w	0.0196	0.898	11615	outcome	TRUE	reported	textfile	RPL10A	3.5e-11	0.0713693	exposure	TRUE	reported	xrRifv	textfile	2	TRUE
rs13249338	G	A	G	A	0.13	-0.0434	0.447016	0.6	FALSE	FALSE	FALSE	YBtn6w	0.0206	0.03538	11050	outcome	TRUE	reported	textfile	RPS20	4.7e-05	0.0628	exposure	TRUE	reported	xrRifv	textfile	2	TRUE
rs140116753	G	A	G	A	0.71	-0.0096	0.038063	0.06	FALSE	FALSE	FALSE	YBtn6w	0.0558	0.8629	10202	outcome	TRUE	reported	textfile	RPS26	2.4e-05	0.319244	exposure	TRUE	reported	xrRifv	textfile	2	TRUE
rs142160737	A	G	A	G	0.59	-0.0554	0.044171	0.07	FALSE	FALSE	FALSE	YBtn6w	0.0417	0.1841	11050	outcome	TRUE	reported	textfile	RPL9	1.1e-05	0.24619	exposure	TRUE	reported	xrRifv	textfile	2	TRUE
rs1458255	A	G	A	G	-0.8	0.0286	0.352894	0.7	FALSE	FALSE	FALSE	YBtn6w	0.0209	0.1707	11615	outcome	TRUE	reported	textfile	RPL9	3.1e-63	0.0541059	exposure	TRUE	reported	xrRifv	textfile	2	TRUE
rs148040441	T	G	T	G	-0.62	0.0569	0.009784	0.01	FALSE	FALSE	FALSE	YBtn6w	0.1233	0.6441	7775	outcome	TRUE	reported	textfile	RPL36	6.3e-06	0.246417	exposure	TRUE	reported	xrRifv	textfile	2	TRUE
rs148483718	T	C	T	C	-0.42	-0.1477	0.037323	0.03	FALSE	FALSE	FALSE	YBtn6w	0.0803	0.06594	9200	outcome	TRUE	reported	textfile	RPS2	8.4e-06	0.171098	exposure	TRUE	reported	xrRifv	textfile	2	TRUE
rs16832263	C	G	C	G	-0.22	-0.0071	0.234625	0.18	FALSE	TRUE	FALSE	YBtn6w	0.0251	0.7763	11615	outcome	TRUE	reported	textfile	RPS8	7e-11	0.0486655	exposure	TRUE	reported	xrRifv	textfile	2	TRUE
rs17205284	T	C	T	C	-0.26	0.0424	0.069022	0.09	FALSE	FALSE	FALSE	YBtn6w	0.0367	0.2479	11050	outcome	TRUE	reported	textfile	RPL31	1.5e-05	0.111651	exposure	TRUE	reported	xrRifv	textfile	2	TRUE
rs17555056	G	C	G	C	-0.18	-0.0189	0.204714	0.11	FALSE	TRUE	FALSE	YBtn6w	0.0317	0.5505	11615	outcome	TRUE	reported	textfile	RPS11	2.4e-06	0.0662631	exposure	TRUE	reported	xrRifv	textfile	2	TRUE
rs17700376	G	A	G	A	-0.25	0.0032	0.296294	0.36	FALSE	FALSE	FALSE	YBtn6w	0.0205	0.8775	11075	outcome	TRUE	reported	textfile	RPL28	7.5e-16	0.0412399	exposure	TRUE	reported	xrRifv	textfile	2	TRUE
rs1952013	G	C	G	C	0.64	-0.0268	0.45647	0.23	FALSE	TRUE	TRUE	YBtn6w	0.0229	0.2425	11615	outcome	TRUE	reported	textfile	RPL36AL	2.3e-27	0.0724231	exposure	TRUE	reported	xrRifv	textfile	2	FALSE
rs2241551	G	T	G	T	-0.36	0.1016	0.179396	0.03	FALSE	FALSE	FALSE	YBtn6w	0.0667	0.1278	11019	outcome	TRUE	reported	textfile	RPS24	1.9e-07	0.112189	exposure	TRUE	reported	xrRifv	textfile	2	TRUE
rs2253513	C	T	C	T	-0.18	0.0145	0.479714	0.38	FALSE	FALSE	FALSE	YBtn6w	0.0198	0.4626	11615	outcome	TRUE	reported	textfile	RPS24	4.9e-09	0.0467468	exposure	TRUE	reported	xrRifv	textfile	2	TRUE
rs226196	A	C	A	C	0.92	0.0078	0.304335	0.69	FALSE	FALSE	FALSE	YBtn6w	0.0208	0.7077	11615	outcome	TRUE	reported	textfile	RPS23	1.7e-44	0.0767061	exposure	TRUE	reported	xrRifv	textfile	2	TRUE
rs2278355	T	C	T	C	0.22	-0.0039	0.451889	0.61	FALSE	FALSE	FALSE	YBtn6w	0.0198	0.8449	11615	outcome	TRUE	reported	textfile	RPS17	2.2e-10	0.0506132	exposure	TRUE	reported	xrRifv	textfile	2	TRUE
rs2314664	G	A	G	A	-0.21	-0.0076	0.320683	0.59	FALSE	FALSE	FALSE	YBtn6w	0.0195	0.6982	11615	outcome	TRUE	reported	textfile	UBA52	8.5e-09	0.0558773	exposure	TRUE	reported	xrRifv	textfile	2	TRUE
rs2417033	A	G	A	G	0.24	0.0103	0.288309	0.32	FALSE	FALSE	FALSE	YBtn6w	0.0209	0.6214	11615	outcome	TRUE	reported	textfile	RPL12	1.8e-06	0.0864967	exposure	TRUE	reported	xrRifv	textfile	2	TRUE
rs2466008	C	G	C	G	0.29	-0.0157	0.170185	0.23	FALSE	TRUE	FALSE	YBtn6w	0.023	0.4962	11615	outcome	TRUE	reported	textfile	RPS20	2.1e-17	0.0446971	exposure	TRUE	reported	xrRifv	textfile	2	TRUE
rs255772	G	C	G	C	0.32	-0.1551	0.231723	0.12	FALSE	TRUE	FALSE	YBtn6w	0.0518	0.002741	7085	outcome	TRUE	reported	textfile	RPS9	1.2e-07	0.0971612	exposure	TRUE	reported	xrRifv	textfile	2	TRUE
rs283514	A	G	A	G	-0.43	-0.0141	0.01731	0.02	FALSE	FALSE	FALSE	YBtn6w	0.1009	0.8891	8526	outcome	TRUE	reported	textfile	RPL13A	1.2e-05	0.180856	exposure	TRUE	reported	xrRifv	textfile	2	TRUE
rs2965200	A	G	A	G	0.17	-0.0214	0.419034	0.64	FALSE	FALSE	FALSE	YBtn6w	0.0208	0.3028	11615	outcome	TRUE	reported	textfile	UBA52	4.9e-05	0.0825104	exposure	TRUE	reported	xrRifv	textfile	2	TRUE
rs323893	T	C	T	C	-0.32	-0.1557	0.107079	0.02	FALSE	FALSE	FALSE	YBtn6w	0.0834	0.06193	10249	outcome	TRUE	reported	textfile	RPL29	4.6e-06	0.123923	exposure	TRUE	reported	xrRifv	textfile	2	TRUE
rs34654758	A	G	A	G	-0.5	0.0301	0.080555	0.09	FALSE	FALSE	FALSE	YBtn6w	0.0449	0.5034	10510	outcome	TRUE	reported	textfile	RPL36AL	4.2e-07	0.163417	exposure	TRUE	reported	xrRifv	textfile	2	TRUE
rs35663774	T	G	T	G	0.16	-0.0002	0.43355	0.71	FALSE	FALSE	FALSE	YBtn6w	0.0231	0.9921	11615	outcome	TRUE	reported	textfile	RPL8	3.8e-05	0.0754961	exposure	TRUE	reported	xrRifv	textfile	2	TRUE
rs4417323	G	C	G	C	0.39	0.0404	0.188984	0.25	FALSE	TRUE	FALSE	YBtn6w	0.0312	0.1949	10510	outcome	TRUE	reported	textfile	RPS26	9.9e-05	0.206019	exposure	TRUE	reported	xrRifv	textfile	2	TRUE
rs4641163	C	G	C	G	0.42	0.014	0.375834	0.44	FALSE	TRUE	TRUE	YBtn6w	0.0201	0.486	11615	outcome	TRUE	reported	textfile	RPL12	5.7e-30	0.0448096	exposure	TRUE	reported	xrRifv	textfile	2	FALSE
rs4676494	C	A	C	A	-0.24	0.0085	0.490207	0.51	FALSE	FALSE	FALSE	YBtn6w	0.0194	0.6609	11615	outcome	TRUE	reported	textfile	RPSA	4.7e-08	0.0693181	exposure	TRUE	reported	xrRifv	textfile	2	TRUE
rs4841	T	C	T	C	-0.29	0.0142	0.264877	0.26	FALSE	FALSE	FALSE	YBtn6w	0.0223	0.5251	11050	outcome	TRUE	reported	textfile	RPS14	2.7e-11	0.0622041	exposure	TRUE	reported	xrRifv	textfile	2	TRUE
rs571606	G	A	G	A	-0.31	0.0578	0.094873	0.12	FALSE	FALSE	FALSE	YBtn6w	0.0307	0.05953	11615	outcome	TRUE	reported	textfile	RPL12	2.4e-05	0.139388	exposure	TRUE	reported	xrRifv	textfile	2	TRUE
rs62106050	A	G	A	G	-0.31	0.0169	0.050147	0.07	FALSE	FALSE	FALSE	YBtn6w	0.0487	0.7281	10510	outcome	TRUE	reported	textfile	RPS7	1.8e-05	0.135468	exposure	TRUE	reported	xrRifv	textfile	2	TRUE
rs6569839	C	A	C	A	-0.14	-0.0058	0.425818	0.49	FALSE	FALSE	FALSE	YBtn6w	0.0191	0.7618	11615	outcome	TRUE	reported	textfile	RPS12	1.6e-05	0.0604895	exposure	TRUE	reported	xrRifv	textfile	2	TRUE
rs66716313	A	G	A	G	-0.21	-0.008	0.412705	0.51	FALSE	FALSE	FALSE	YBtn6w	0.0202	0.6935	11050	outcome	TRUE	reported	textfile	RPL8	3.8e-10	0.0492723	exposure	TRUE	reported	xrRifv	textfile	2	TRUE
rs67627137	G	C	G	C	-0.38	0.0205	0.291534	0.38	FALSE	TRUE	FALSE	YBtn6w	0.0196	0.2972	11615	outcome	TRUE	reported	textfile	RPS9	2.2e-19	0.0542639	exposure	TRUE	reported	xrRifv	textfile	2	TRUE
rs6817831	C	A	C	A	-0.42	-0.0007	0.106195	0.87	FALSE	FALSE	FALSE	YBtn6w	0.0354	0.9831	11050	outcome	TRUE	reported	textfile	RPL9	1.6e-05	0.181469	exposure	TRUE	reported	xrRifv	textfile	2	TRUE
rs7013949	C	T	C	T	-0.52	-0.1812	0.033508	0.02	FALSE	FALSE	FALSE	YBtn6w	0.093	0.05126	9200	outcome	TRUE	reported	textfile	RPS20	3.3e-05	0.241668	exposure	TRUE	reported	xrRifv	textfile	2	TRUE
rs7105187	T	C	T	C	-0.23	-0.0561	0.259955	0.24	FALSE	FALSE	FALSE	YBtn6w	0.0224	0.01237	11615	outcome	TRUE	reported	textfile	RPS25	3e-10	0.0535036	exposure	TRUE	reported	xrRifv	textfile	2	TRUE
rs7169648	C	A	C	A	-0.35	0.004	0.136401	0.09	FALSE	FALSE	FALSE	YBtn6w	0.0332	0.9039	11615	outcome	TRUE	reported	textfile	RPS27L	1.3e-08	0.0949522	exposure	TRUE	reported	xrRifv	textfile	2	TRUE
rs7196903	T	C	T	C	-0.2	0.0157	0.161071	0.19	FALSE	FALSE	FALSE	YBtn6w	0.0243	0.5175	11615	outcome	TRUE	reported	textfile	RPL13	3.2e-05	0.0926464	exposure	TRUE	reported	xrRifv	textfile	2	TRUE
rs7250889	T	C	T	C	-0.24	0.0352	0.452594	0.41	FALSE	FALSE	FALSE	YBtn6w	0.0197	0.07465	11615	outcome	TRUE	reported	textfile	RPS5	8.7e-09	0.0639267	exposure	TRUE	reported	xrRifv	textfile	2	TRUE
rs7516631	G	C	G	C	0.13	-0.005	0.31177	0.19	FALSE	TRUE	FALSE	YBtn6w	0.0267	0.8527	11050	outcome	TRUE	reported	textfile	RPS8	8.6e-05	0.0674612	exposure	TRUE	reported	xrRifv	textfile	2	TRUE
rs75771272	C	T	C	T	0.49	-0.028	0.137711	0.17	FALSE	FALSE	FALSE	YBtn6w	0.0261	0.2838	11615	outcome	TRUE	reported	textfile	RPL9	8.4e-07	0.167473	exposure	TRUE	reported	xrRifv	textfile	2	TRUE
rs76662861	A	G	A	G	-0.28	-0.0642	0.05857	0.03	FALSE	FALSE	FALSE	YBtn6w	0.0619	0.3	10613	outcome	TRUE	reported	textfile	RPL34	5.4e-05	0.137416	exposure	TRUE	reported	xrRifv	textfile	2	TRUE
rs76894712	A	T	A	T	0.42	-0.0092	0.117647	0.17	FALSE	TRUE	FALSE	YBtn6w	0.0258	0.7208	11615	outcome	TRUE	reported	textfile	RPS23	2.8e-05	0.191855	exposure	TRUE	reported	xrRifv	textfile	2	TRUE
rs773126	A	T	A	T	0.45	0.0003	0.369721	0.41	FALSE	TRUE	FALSE	YBtn6w	0.0266	0.9921	10202	outcome	TRUE	reported	textfile	RPS26	1.8e-08	0.12396	exposure	TRUE	reported	xrRifv	textfile	2	TRUE
rs77508451	A	G	A	G	-0.77	-0.0556	0.047728	0.05	FALSE	FALSE	FALSE	YBtn6w	0.0468	0.2354	11432	outcome	TRUE	reported	textfile	RPS26	7.3e-06	0.309891	exposure	TRUE	reported	xrRifv	textfile	2	TRUE
rs78823924	C	T	C	T	0.59	0.1123	0.007079	0.02	FALSE	FALSE	FALSE	YBtn6w	0.1317	0.3935	6373	outcome	TRUE	reported	textfile	RPS13	2e-05	0.260498	exposure	TRUE	reported	xrRifv	textfile	2	TRUE
rs79592126	A	G	A	G	-0.59	0.075	0.01517	0.01	FALSE	FALSE	FALSE	YBtn6w	0.091	0.4102	9843	outcome	TRUE	reported	textfile	RPS18	1.8e-05	0.257827	exposure	TRUE	reported	xrRifv	textfile	2	TRUE
rs79796289	C	T	C	T	0.26	0.019	0.118508	0.16	FALSE	FALSE	FALSE	YBtn6w	0.0344	0.5793	10510	outcome	TRUE	reported	textfile	RPL10A	5e-05	0.126482	exposure	TRUE	reported	xrRifv	textfile	2	TRUE
rs9808287	A	G	A	G	-0.33	-0.0381	0.126277	0.13	FALSE	FALSE	FALSE	YBtn6w	0.0295	0.1961	11615	outcome	TRUE	reported	textfile	RPS7	6.5e-08	0.0969314	exposure	TRUE	reported	xrRifv	textfile	2	TRUE
Brain cortex-Longevity 99p
SNP	effect_allele.exposure	other_allele.exposure	effect_allele.outcome	other_allele.outcome	beta.exposure	beta.outcome	eaf.exposure	eaf.outcome	remove	palindromic	ambiguous	id.outcome	se.outcome	pval.outcome	samplesize.outcome	outcome	mr_keep.outcome	pval_origin.outcome	data_source.outcome	gene.exposure	pval.exposure	se.exposure	exposure	mr_keep.exposure	pval_origin.exposure	id.exposure	data_source.exposure	action	mr_keep
rs10025155	C	T	C	T	-0.39	0.0111	0.199151	0.18	FALSE	FALSE	FALSE	AeD65T	0.0393	0.7769	4524	outcome	TRUE	reported	textfile	RPL9	1.7e-07	0.120763	exposure	TRUE	reported	xrRifv	textfile	2	TRUE
rs10042896	A	G	A	G	0.36	-0.0054	0.47224	0.46	FALSE	FALSE	FALSE	AeD65T	0.03	0.8559	4524	outcome	TRUE	reported	textfile	RPS23	1.3e-07	0.109795	exposure	TRUE	reported	xrRifv	textfile	2	TRUE
rs10426111	C	T	C	T	-0.21	-0.0238	0.341218	0.65	FALSE	FALSE	FALSE	AeD65T	0.0352	0.4996	4154	outcome	TRUE	reported	textfile	RPS28	1.2e-05	0.0883248	exposure	TRUE	reported	xrRifv	textfile	2	TRUE
rs1057232	A	G	A	G	-0.4	0.0167	0.41518	0.55	FALSE	FALSE	FALSE	AeD65T	0.0303	0.5814	4524	outcome	TRUE	reported	textfile	RPS28	4.2e-23	0.0506386	exposure	TRUE	reported	xrRifv	textfile	2	TRUE
rs10987651	A	G	A	G	0.56	-0.0214	0.091187	0.1	FALSE	FALSE	FALSE	AeD65T	0.0495	0.6652	4524	outcome	TRUE	reported	textfile	RPL12	1.8e-11	0.118609	exposure	TRUE	reported	xrRifv	textfile	2	TRUE
rs11171705	G	A	G	A	0.69	-0.0532	0.070294	0.07	FALSE	FALSE	FALSE	AeD65T	0.0646	0.4099	4303	outcome	TRUE	reported	textfile	RPS26	1.6e-05	0.298127	exposure	TRUE	reported	xrRifv	textfile	2	TRUE
rs111940206	A	G	A	G	0.4	-0.0161	0.014714	0.04	FALSE	FALSE	FALSE	AeD65T	0.1092	0.8826	3545	outcome	TRUE	reported	textfile	RPS20	5.4e-05	0.196309	exposure	TRUE	reported	xrRifv	textfile	2	TRUE
rs1131017	G	C	G	C	-1.1	0.022	0.444089	0.42	FALSE	TRUE	TRUE	AeD65T	0.0304	0.47	4524	outcome	TRUE	reported	textfile	RPS26	2.8e-80	0.0648052	exposure	TRUE	reported	xrRifv	textfile	2	FALSE
rs1150797	A	G	A	G	-0.21	-0.0202	0.181838	0.25	FALSE	FALSE	FALSE	AeD65T	0.0352	0.5667	4524	outcome	TRUE	reported	textfile	RPL7L1	7.5e-08	0.0621529	exposure	TRUE	reported	xrRifv	textfile	2	TRUE
rs11553984	T	C	T	C	-0.87	0.0403	0.025239	0.03	FALSE	FALSE	FALSE	AeD65T	0.1083	0.7101	3545	outcome	TRUE	reported	textfile	RPL10A	5.3e-10	0.206653	exposure	TRUE	reported	xrRifv	textfile	2	TRUE
rs11750053	A	C	A	C	-0.46	0.0313	0.24042	0.31	FALSE	FALSE	FALSE	AeD65T	0.0335	0.3504	4524	outcome	TRUE	reported	textfile	RPS23	4.1e-09	0.118553	exposure	TRUE	reported	xrRifv	textfile	2	TRUE
rs12525930	C	T	C	T	-0.33	-0.0379	0.443721	0.53	FALSE	FALSE	FALSE	AeD65T	0.0307	0.2161	4524	outcome	TRUE	reported	textfile	RPL10A	3.5e-11	0.0713693	exposure	TRUE	reported	xrRifv	textfile	2	TRUE
rs13249338	G	A	G	A	0.13	-0.0796	0.447016	0.6	FALSE	FALSE	FALSE	AeD65T	0.0331	0.01614	4154	outcome	TRUE	reported	textfile	RPS20	4.7e-05	0.0628	exposure	TRUE	reported	xrRifv	textfile	2	TRUE
rs140116753	G	A	G	A	0.71	0.0942	0.038063	0.06	FALSE	FALSE	FALSE	AeD65T	0.0871	0.2797	3680	outcome	TRUE	reported	textfile	RPS26	2.4e-05	0.319244	exposure	TRUE	reported	xrRifv	textfile	2	TRUE
rs142160737	A	G	A	G	0.59	-0.1396	0.044171	0.07	FALSE	FALSE	FALSE	AeD65T	0.0702	0.04675	3933	outcome	TRUE	reported	textfile	RPL9	1.1e-05	0.24619	exposure	TRUE	reported	xrRifv	textfile	2	TRUE
rs1458255	A	G	A	G	-0.8	0.0409	0.352894	0.71	FALSE	FALSE	FALSE	AeD65T	0.0329	0.2132	4524	outcome	TRUE	reported	textfile	RPL9	3.1e-63	0.0541059	exposure	TRUE	reported	xrRifv	textfile	2	TRUE
rs148483718	T	C	T	C	-0.42	-0.1398	0.037323	0.02	FALSE	FALSE	FALSE	AeD65T	0.1451	0.3352	2829	outcome	TRUE	reported	textfile	RPS2	8.4e-06	0.171098	exposure	TRUE	reported	xrRifv	textfile	2	TRUE
rs16832263	C	G	C	G	-0.22	-0.014	0.234625	0.17	FALSE	TRUE	FALSE	AeD65T	0.0401	0.7258	4524	outcome	TRUE	reported	textfile	RPS8	7e-11	0.0486655	exposure	TRUE	reported	xrRifv	textfile	2	TRUE
rs17205284	T	C	T	C	-0.26	0.0417	0.069022	0.09	FALSE	FALSE	FALSE	AeD65T	0.059	0.4792	4154	outcome	TRUE	reported	textfile	RPL31	1.5e-05	0.111651	exposure	TRUE	reported	xrRifv	textfile	2	TRUE
rs17555056	G	C	G	C	-0.18	-0.0231	0.204714	0.11	FALSE	TRUE	FALSE	AeD65T	0.0497	0.6417	4524	outcome	TRUE	reported	textfile	RPS11	2.4e-06	0.0662631	exposure	TRUE	reported	xrRifv	textfile	2	TRUE
rs17700376	G	A	G	A	-0.25	0.0228	0.296294	0.36	FALSE	FALSE	FALSE	AeD65T	0.031	0.4617	4524	outcome	TRUE	reported	textfile	RPL28	7.5e-16	0.0412399	exposure	TRUE	reported	xrRifv	textfile	2	TRUE
rs1952013	G	C	G	C	0.64	0.0283	0.45647	0.23	FALSE	TRUE	TRUE	AeD65T	0.0357	0.4268	4524	outcome	TRUE	reported	textfile	RPL36AL	2.3e-27	0.0724231	exposure	TRUE	reported	xrRifv	textfile	2	FALSE
rs2241551	G	T	G	T	-0.36	0.2994	0.179396	0.02	FALSE	FALSE	FALSE	AeD65T	0.1123	0.007686	3692	outcome	TRUE	reported	textfile	RPS24	1.9e-07	0.112189	exposure	TRUE	reported	xrRifv	textfile	2	TRUE
rs2253513	C	T	C	T	-0.18	0.0223	0.479714	0.39	FALSE	FALSE	FALSE	AeD65T	0.0307	0.4665	4524	outcome	TRUE	reported	textfile	RPS24	4.9e-09	0.0467468	exposure	TRUE	reported	xrRifv	textfile	2	TRUE
rs226196	A	C	A	C	0.92	0.0075	0.304335	0.69	FALSE	FALSE	FALSE	AeD65T	0.0322	0.8165	4524	outcome	TRUE	reported	textfile	RPS23	1.7e-44	0.0767061	exposure	TRUE	reported	xrRifv	textfile	2	TRUE
rs2278355	T	C	T	C	0.22	0.0204	0.451889	0.61	FALSE	FALSE	FALSE	AeD65T	0.0309	0.5084	4524	outcome	TRUE	reported	textfile	RPS17	2.2e-10	0.0506132	exposure	TRUE	reported	xrRifv	textfile	2	TRUE
rs2314664	G	A	G	A	-0.21	-0.0194	0.320683	0.59	FALSE	FALSE	FALSE	AeD65T	0.0306	0.5252	4524	outcome	TRUE	reported	textfile	UBA52	8.5e-09	0.0558773	exposure	TRUE	reported	xrRifv	textfile	2	TRUE
rs2417033	A	G	A	G	0.24	0.0339	0.288309	0.32	FALSE	FALSE	FALSE	AeD65T	0.0324	0.2945	4524	outcome	TRUE	reported	textfile	RPL12	1.8e-06	0.0864967	exposure	TRUE	reported	xrRifv	textfile	2	TRUE
rs2466008	C	G	C	G	0.29	-0.0385	0.170185	0.24	FALSE	TRUE	FALSE	AeD65T	0.0355	0.2784	4524	outcome	TRUE	reported	textfile	RPS20	2.1e-17	0.0446971	exposure	TRUE	reported	xrRifv	textfile	2	TRUE
rs255772	G	C	G	C	0.32	-0.1654	0.231723	0.13	FALSE	TRUE	FALSE	AeD65T	0.0795	0.03738	3260	outcome	TRUE	reported	textfile	RPS9	1.2e-07	0.0971612	exposure	TRUE	reported	xrRifv	textfile	2	TRUE
rs283514	A	G	A	G	-0.43	-0.134	0.01731	0.02	FALSE	FALSE	FALSE	AeD65T	0.1524	0.3792	2779	outcome	TRUE	reported	textfile	RPL13A	1.2e-05	0.180856	exposure	TRUE	reported	xrRifv	textfile	2	TRUE
rs2965200	A	G	A	G	0.17	-0.0423	0.419034	0.64	FALSE	FALSE	FALSE	AeD65T	0.0324	0.1914	4524	outcome	TRUE	reported	textfile	UBA52	4.9e-05	0.0825104	exposure	TRUE	reported	xrRifv	textfile	2	TRUE
rs323893	T	C	T	C	-0.32	-0.2639	0.107079	0.02	FALSE	FALSE	FALSE	AeD65T	0.1351	0.05071	3692	outcome	TRUE	reported	textfile	RPL29	4.6e-06	0.123923	exposure	TRUE	reported	xrRifv	textfile	2	TRUE
rs34654758	A	G	A	G	-0.5	-0.0511	0.080555	0.08	FALSE	FALSE	FALSE	AeD65T	0.0748	0.4945	3812	outcome	TRUE	reported	textfile	RPL36AL	4.2e-07	0.163417	exposure	TRUE	reported	xrRifv	textfile	2	TRUE
rs35663774	T	G	T	G	0.16	0.0249	0.43355	0.71	FALSE	FALSE	FALSE	AeD65T	0.0352	0.4799	4524	outcome	TRUE	reported	textfile	RPL8	3.8e-05	0.0754961	exposure	TRUE	reported	xrRifv	textfile	2	TRUE
rs4417323	G	C	G	C	0.39	0.0856	0.188984	0.25	FALSE	TRUE	FALSE	AeD65T	0.0495	0.08355	4000	outcome	TRUE	reported	textfile	RPS26	9.9e-05	0.206019	exposure	TRUE	reported	xrRifv	textfile	2	TRUE
rs4641163	C	G	C	G	0.42	-0.0009	0.375834	0.44	FALSE	TRUE	TRUE	AeD65T	0.0314	0.9765	4524	outcome	TRUE	reported	textfile	RPL12	5.7e-30	0.0448096	exposure	TRUE	reported	xrRifv	textfile	2	FALSE
rs4676494	C	A	C	A	-0.24	0.0106	0.490207	0.52	FALSE	FALSE	FALSE	AeD65T	0.0303	0.725	4524	outcome	TRUE	reported	textfile	RPSA	4.7e-08	0.0693181	exposure	TRUE	reported	xrRifv	textfile	2	TRUE
rs4841	T	C	T	C	-0.29	0.0206	0.264877	0.25	FALSE	FALSE	FALSE	AeD65T	0.0363	0.5708	4154	outcome	TRUE	reported	textfile	RPS14	2.7e-11	0.0622041	exposure	TRUE	reported	xrRifv	textfile	2	TRUE
rs571606	G	A	G	A	-0.31	0.1213	0.094873	0.12	FALSE	FALSE	FALSE	AeD65T	0.0469	0.009757	4524	outcome	TRUE	reported	textfile	RPL12	2.4e-05	0.139388	exposure	TRUE	reported	xrRifv	textfile	2	TRUE
rs62106050	A	G	A	G	-0.31	-0.0089	0.050147	0.07	FALSE	FALSE	FALSE	AeD65T	0.0807	0.9121	3680	outcome	TRUE	reported	textfile	RPS7	1.8e-05	0.135468	exposure	TRUE	reported	xrRifv	textfile	2	TRUE
rs6569839	C	A	C	A	-0.14	0.0025	0.425818	0.5	FALSE	FALSE	FALSE	AeD65T	0.0302	0.9345	4524	outcome	TRUE	reported	textfile	RPS12	1.6e-05	0.0604895	exposure	TRUE	reported	xrRifv	textfile	2	TRUE
rs66716313	A	G	A	G	-0.21	-0.0096	0.412705	0.52	FALSE	FALSE	FALSE	AeD65T	0.0324	0.7661	4154	outcome	TRUE	reported	textfile	RPL8	3.8e-10	0.0492723	exposure	TRUE	reported	xrRifv	textfile	2	TRUE
rs67627137	G	C	G	C	-0.38	0.0324	0.291534	0.37	FALSE	TRUE	FALSE	AeD65T	0.0311	0.2972	4524	outcome	TRUE	reported	textfile	RPS9	2.2e-19	0.0542639	exposure	TRUE	reported	xrRifv	textfile	2	TRUE
rs6817831	C	A	C	A	-0.42	-0.0108	0.106195	0.87	FALSE	FALSE	FALSE	AeD65T	0.0572	0.8499	4154	outcome	TRUE	reported	textfile	RPL9	1.6e-05	0.181469	exposure	TRUE	reported	xrRifv	textfile	2	TRUE
rs7013949	C	T	C	T	-0.52	-0.2722	0.033508	0.02	FALSE	FALSE	FALSE	AeD65T	0.1674	0.104	2790	outcome	TRUE	reported	textfile	RPS20	3.3e-05	0.241668	exposure	TRUE	reported	xrRifv	textfile	2	TRUE
rs7105187	T	C	T	C	-0.23	-0.0584	0.259955	0.24	FALSE	FALSE	FALSE	AeD65T	0.0353	0.0983	4524	outcome	TRUE	reported	textfile	RPS25	3e-10	0.0535036	exposure	TRUE	reported	xrRifv	textfile	2	TRUE
rs7169648	C	A	C	A	-0.35	0.0597	0.136401	0.1	FALSE	FALSE	FALSE	AeD65T	0.0509	0.241	4524	outcome	TRUE	reported	textfile	RPS27L	1.3e-08	0.0949522	exposure	TRUE	reported	xrRifv	textfile	2	TRUE
rs7196903	T	C	T	C	-0.2	-0.0084	0.161071	0.2	FALSE	FALSE	FALSE	AeD65T	0.0379	0.8248	4524	outcome	TRUE	reported	textfile	RPL13	3.2e-05	0.0926464	exposure	TRUE	reported	xrRifv	textfile	2	TRUE
rs7250889	T	C	T	C	-0.24	0.0083	0.452594	0.42	FALSE	FALSE	FALSE	AeD65T	0.0311	0.7897	4524	outcome	TRUE	reported	textfile	RPS5	8.7e-09	0.0639267	exposure	TRUE	reported	xrRifv	textfile	2	TRUE
rs7516631	G	C	G	C	0.13	-0.0609	0.31177	0.18	FALSE	TRUE	FALSE	AeD65T	0.0435	0.1617	4154	outcome	TRUE	reported	textfile	RPS8	8.6e-05	0.0674612	exposure	TRUE	reported	xrRifv	textfile	2	TRUE
rs75771272	C	T	C	T	0.49	0.0201	0.137711	0.17	FALSE	FALSE	FALSE	AeD65T	0.0404	0.6193	4524	outcome	TRUE	reported	textfile	RPL9	8.4e-07	0.167473	exposure	TRUE	reported	xrRifv	textfile	2	TRUE
rs76662861	A	G	A	G	-0.28	-0.042	0.05857	0.03	FALSE	FALSE	FALSE	AeD65T	0.1042	0.6869	3545	outcome	TRUE	reported	textfile	RPL34	5.4e-05	0.137416	exposure	TRUE	reported	xrRifv	textfile	2	TRUE
rs76894712	A	T	A	T	0.42	-0.0095	0.117647	0.17	FALSE	TRUE	FALSE	AeD65T	0.0407	0.8163	4524	outcome	TRUE	reported	textfile	RPS23	2.8e-05	0.191855	exposure	TRUE	reported	xrRifv	textfile	2	TRUE
rs773126	A	T	A	T	0.45	-0.0248	0.369721	0.4	FALSE	TRUE	FALSE	AeD65T	0.0417	0.5527	4154	outcome	TRUE	reported	textfile	RPS26	1.8e-08	0.12396	exposure	TRUE	reported	xrRifv	textfile	2	TRUE
rs77508451	A	G	A	G	-0.77	-0.0311	0.047728	0.05	FALSE	FALSE	FALSE	AeD65T	0.0775	0.6885	4171	outcome	TRUE	reported	textfile	RPS26	7.3e-06	0.309891	exposure	TRUE	reported	xrRifv	textfile	2	TRUE
rs78823924	C	T	C	T	0.59	0.2175	0.007079	0.02	FALSE	FALSE	FALSE	AeD65T	0.2083	0.2964	2297	outcome	TRUE	reported	textfile	RPS13	2e-05	0.260498	exposure	TRUE	reported	xrRifv	textfile	2	TRUE
rs79592126	A	G	A	G	-0.59	0.1992	0.01517	0.02	FALSE	FALSE	FALSE	AeD65T	0.1763	0.2584	2829	outcome	TRUE	reported	textfile	RPS18	1.8e-05	0.257827	exposure	TRUE	reported	xrRifv	textfile	2	TRUE
rs79796289	C	T	C	T	0.26	0.0621	0.118508	0.16	FALSE	FALSE	FALSE	AeD65T	0.0548	0.2572	4000	outcome	TRUE	reported	textfile	RPL10A	5e-05	0.126482	exposure	TRUE	reported	xrRifv	textfile	2	TRUE
rs9808287	A	G	A	G	-0.33	-0.0507	0.126277	0.13	FALSE	FALSE	FALSE	AeD65T	0.0447	0.2559	4524	outcome	TRUE	reported	textfile	RPS7	6.5e-08	0.0969314	exposure	TRUE	reported	xrRifv	textfile	2	TRUE
Pancreas-Longevity 90p
SNP	effect_allele.exposure	other_allele.exposure	effect_allele.outcome	other_allele.outcome	beta.exposure	beta.outcome	eaf.exposure	eaf.outcome	remove	palindromic	ambiguous	id.outcome	se.outcome	pval.outcome	samplesize.outcome	outcome	mr_keep.outcome	pval_origin.outcome	data_source.outcome	gene.exposure	pval.exposure	se.exposure	exposure	mr_keep.exposure	pval_origin.exposure	id.exposure	data_source.exposure	action	mr_keep
rs10421495	G	A	G	A	-0.19	0.0154	0.455109	0.53	FALSE	FALSE	FALSE	JNuRkj	0.0202	0.4457	11615	outcome	TRUE	reported	textfile	RPS28	6.3e-07	0.0381389	exposure	TRUE	reported	o3DQQ9	textfile	2	TRUE
rs1057232	A	G	A	G	-0.43	0.0368	0.41518	0.55	FALSE	FALSE	FALSE	JNuRkj	0.0198	0.0636	11075	outcome	TRUE	reported	textfile	RPS28	3.3e-34	0.03526	exposure	TRUE	reported	o3DQQ9	textfile	2	TRUE
rs10987645	G	C	G	C	0.3	0.0085	0.375016	0.41	FALSE	TRUE	FALSE	JNuRkj	0.0197	0.6655	11615	outcome	TRUE	reported	textfile	RPL12	1.5e-21	0.0314633	exposure	TRUE	reported	o3DQQ9	textfile	2	TRUE
rs11171744	C	G	C	G	-0.55	-0.0302	0.092302	0.14	FALSE	TRUE	FALSE	JNuRkj	0.0358	0.3986	10510	outcome	TRUE	reported	textfile	RPS26	1.8e-05	0.128254	exposure	TRUE	reported	o3DQQ9	textfile	2	TRUE
rs11171773	G	A	G	A	-0.61	0.024	0.226101	0.93	FALSE	FALSE	FALSE	JNuRkj	0.0424	0.5705	11615	outcome	TRUE	reported	textfile	RPS26	3.8e-06	0.131977	exposure	TRUE	reported	o3DQQ9	textfile	2	TRUE
rs111804650	T	C	T	C	0.19	-0.0872	0.07426	0.09	FALSE	FALSE	FALSE	JNuRkj	0.035	0.01277	11615	outcome	TRUE	reported	textfile	RPS25	6.7e-06	0.0421941	exposure	TRUE	reported	o3DQQ9	textfile	2	TRUE
rs112110624	A	G	A	G	0.34	-0.1109	0.01877	0.03	FALSE	FALSE	FALSE	JNuRkj	0.0676	0.1009	10711	outcome	TRUE	reported	textfile	RPL37	8.2e-05	0.0863278	exposure	TRUE	reported	o3DQQ9	textfile	2	TRUE
rs1131017	G	C	G	C	-1.2	0.0149	0.444089	0.42	FALSE	TRUE	TRUE	JNuRkj	0.0195	0.4468	11615	outcome	TRUE	reported	textfile	RPS26	5.5e-156	0.0450994	exposure	TRUE	reported	o3DQQ9	textfile	2	FALSE
rs113235151	T	C	T	C	-0.29	0.0367	0.044072	0.05	FALSE	FALSE	FALSE	JNuRkj	0.0489	0.4533	10867	outcome	TRUE	reported	textfile	RPL27A	1.1e-05	0.0659612	exposure	TRUE	reported	o3DQQ9	textfile	2	TRUE
rs113703216	G	T	G	T	-0.28	-0.0284	0.024561	0.07	FALSE	FALSE	FALSE	JNuRkj	0.0407	0.4857	11075	outcome	TRUE	reported	textfile	RPS2	1.2e-05	0.0639622	exposure	TRUE	reported	o3DQQ9	textfile	2	TRUE
rs113775775	C	T	C	T	-1	0.0304	0.012484	0.02	FALSE	FALSE	FALSE	JNuRkj	0.0818	0.7101	9606	outcome	TRUE	reported	textfile	RPL10A	8.4e-11	0.154006	exposure	TRUE	reported	o3DQQ9	textfile	2	TRUE
rs114584454	G	T	G	T	-0.23	0.0155	0.192964	0.2	FALSE	FALSE	FALSE	JNuRkj	0.025	0.536	11615	outcome	TRUE	reported	textfile	RPSA	1.4e-07	0.0436827	exposure	TRUE	reported	o3DQQ9	textfile	2	TRUE
rs115675705	G	A	G	A	0.32	-0.0955	0.022034	0.03	FALSE	FALSE	FALSE	JNuRkj	0.065	0.1418	10559	outcome	TRUE	reported	textfile	RPS10	3.5e-05	0.0773278	exposure	TRUE	reported	o3DQQ9	textfile	2	TRUE
rs116585983	A	G	A	G	0.81	0.0257	0.0145	0.02	FALSE	FALSE	FALSE	JNuRkj	0.0787	0.7438	10048	outcome	TRUE	reported	textfile	RPL9	5.8e-05	0.201452	exposure	TRUE	reported	o3DQQ9	textfile	2	TRUE
rs116640761	A	G	A	G	-0.46	-0.0878	0.012555	0.03	FALSE	FALSE	FALSE	JNuRkj	0.0803	0.2742	9327	outcome	TRUE	reported	textfile	RPSA	1.1e-05	0.104628	exposure	TRUE	reported	o3DQQ9	textfile	2	TRUE
rs11727177	G	A	G	A	0.59	-0.0612	0.053014	0.06	FALSE	FALSE	FALSE	JNuRkj	0.0415	0.1401	11615	outcome	TRUE	reported	textfile	RPL9	3.2e-06	0.126676	exposure	TRUE	reported	o3DQQ9	textfile	2	TRUE
rs117312206	G	A	G	A	-0.48	0.0516	0.0443	0.07	FALSE	FALSE	FALSE	JNuRkj	0.0406	0.204	11075	outcome	TRUE	reported	textfile	RPL28	6.9e-09	0.0828538	exposure	TRUE	reported	o3DQQ9	textfile	2	TRUE
rs117396149	A	G	A	G	1.2	-0.033	0.026158	0.03	FALSE	FALSE	FALSE	JNuRkj	0.089	0.7109	7385	outcome	TRUE	reported	textfile	RPS26	3e-06	0.256914	exposure	TRUE	reported	o3DQQ9	textfile	2	TRUE
rs11777703	A	G	A	G	-0.15	0.0053	0.495267	0.48	FALSE	FALSE	FALSE	JNuRkj	0.0209	0.8007	11615	outcome	TRUE	reported	textfile	RPL8	2.9e-05	0.035875	exposure	TRUE	reported	o3DQQ9	textfile	2	TRUE
rs11858705	A	T	A	T	-0.18	-0.0028	0.346026	0.26	FALSE	TRUE	FALSE	JNuRkj	0.0221	0.9006	11615	outcome	TRUE	reported	textfile	RPS27L	1.4e-05	0.0414378	exposure	TRUE	reported	o3DQQ9	textfile	2	TRUE
rs12120833	G	C	G	C	-0.35	-0.0109	0.10548	0.13	FALSE	TRUE	FALSE	JNuRkj	0.0309	0.7237	11050	outcome	TRUE	reported	textfile	RPS8	6.7e-14	0.0467064	exposure	TRUE	reported	o3DQQ9	textfile	2	TRUE
rs12185167	T	C	T	C	0.19	0.0075	0.074681	0.19	FALSE	FALSE	FALSE	JNuRkj	0.0362	0.837	7402	outcome	TRUE	reported	textfile	RPS2	1.2e-06	0.0391298	exposure	TRUE	reported	o3DQQ9	textfile	2	TRUE
rs12441911	G	A	G	A	-0.16	0.0061	0.315426	0.25	FALSE	FALSE	FALSE	JNuRkj	0.0228	0.7904	11050	outcome	TRUE	reported	textfile	RPS27L	6.5e-05	0.0400613	exposure	TRUE	reported	o3DQQ9	textfile	2	TRUE
rs12881290	A	C	A	C	-0.31	0.0294	0.079118	0.09	FALSE	FALSE	FALSE	JNuRkj	0.045	0.5132	10510	outcome	TRUE	reported	textfile	RPL36AL	3.5e-06	0.0668239	exposure	TRUE	reported	o3DQQ9	textfile	2	TRUE
rs13072532	T	C	T	C	-0.33	0.0403	0.056412	0.07	FALSE	FALSE	FALSE	JNuRkj	0.0448	0.369	11050	outcome	TRUE	reported	textfile	RPSA	2.5e-05	0.0782955	exposure	TRUE	reported	o3DQQ9	textfile	2	TRUE
rs13098237	C	T	C	T	0.2	-0.0256	0.243496	0.24	FALSE	FALSE	FALSE	JNuRkj	0.024	0.2863	11050	outcome	TRUE	reported	textfile	RPSA	1.1e-06	0.0410437	exposure	TRUE	reported	o3DQQ9	textfile	2	TRUE
rs137863738	G	A	G	A	0.96	-0.1107	0.019391	0.04	FALSE	FALSE	FALSE	JNuRkj	0.0836	0.1852	7490	outcome	TRUE	reported	textfile	RPL3L	4.7e-05	0.235868	exposure	TRUE	reported	o3DQQ9	textfile	2	TRUE
rs1384256	A	G	A	G	0.19	-0.0082	0.499423	0.48	FALSE	FALSE	FALSE	JNuRkj	0.0192	0.6684	11615	outcome	TRUE	reported	textfile	RPS23	4e-06	0.0412024	exposure	TRUE	reported	o3DQQ9	textfile	2	TRUE
rs141027594	T	C	T	C	0.27	0.0056	0.040669	0.04	FALSE	FALSE	FALSE	JNuRkj	0.0803	0.9446	8485	outcome	TRUE	reported	textfile	RPS8	3.6e-05	0.0653475	exposure	TRUE	reported	o3DQQ9	textfile	2	TRUE
rs144131441	C	G	C	G	-0.83	-0.0377	0.049579	0.07	FALSE	TRUE	FALSE	JNuRkj	0.0421	0.3702	11615	outcome	TRUE	reported	textfile	RPS26	3.6e-07	0.163098	exposure	TRUE	reported	o3DQQ9	textfile	2	TRUE
rs145044106	C	G	C	G	-0.57	0.1198	0.008986	0.02	FALSE	TRUE	FALSE	JNuRkj	0.083	0.1487	10305	outcome	TRUE	reported	textfile	RPS18	2.1e-06	0.120163	exposure	TRUE	reported	o3DQQ9	textfile	2	TRUE
rs149874092	C	G	C	G	0.42	0.0301	0.127796	0.15	FALSE	TRUE	FALSE	JNuRkj	0.0321	0.3479	11050	outcome	TRUE	reported	textfile	RPS26	5e-05	0.10356	exposure	TRUE	reported	o3DQQ9	textfile	2	TRUE
rs17700376	G	A	G	A	-0.61	0.0032	0.296294	0.36	FALSE	FALSE	FALSE	JNuRkj	0.0205	0.8775	11075	outcome	TRUE	reported	textfile	RPL28	3.9e-53	0.0397556	exposure	TRUE	reported	o3DQQ9	textfile	2	TRUE
rs184023977	T	C	T	C	-0.58	-0.014	0.009616	0.02	FALSE	FALSE	FALSE	JNuRkj	0.131	0.9147	7003	outcome	TRUE	reported	textfile	RPS23	7.2e-06	0.129242	exposure	TRUE	reported	o3DQQ9	textfile	2	TRUE
rs184240697	T	C	T	C	-0.53	-0.0686	0.017325	0.02	FALSE	FALSE	FALSE	JNuRkj	0.0895	0.4436	10146	outcome	TRUE	reported	textfile	RPL36AL	5.4e-05	0.131266	exposure	TRUE	reported	o3DQQ9	textfile	2	TRUE
rs184655294	A	G	A	G	-0.64	0.051	0.014333	0.02	FALSE	FALSE	FALSE	JNuRkj	0.0873	0.5591	9144	outcome	TRUE	reported	textfile	RPL28	1.5e-05	0.147851	exposure	TRUE	reported	o3DQQ9	textfile	2	TRUE
rs1860236	C	A	C	A	-0.42	-0.0528	0.244209	0.15	FALSE	FALSE	FALSE	JNuRkj	0.0308	0.0867	10510	outcome	TRUE	reported	textfile	RPL3L	1.2e-05	0.0959432	exposure	TRUE	reported	o3DQQ9	textfile	2	TRUE
rs1863897	T	C	T	C	0.19	-0.0249	0.493642	0.6	FALSE	FALSE	FALSE	JNuRkj	0.0203	0.2206	11050	outcome	TRUE	reported	textfile	RPS24	2.6e-09	0.0319057	exposure	TRUE	reported	o3DQQ9	textfile	2	TRUE
rs193864	C	A	C	A	-0.12	-0.0266	0.32298	0.69	FALSE	FALSE	FALSE	JNuRkj	0.0207	0.1986	11615	outcome	TRUE	reported	textfile	RPL37	2.7e-05	0.0285891	exposure	TRUE	reported	o3DQQ9	textfile	2	TRUE
rs1952013	G	C	G	C	0.49	-0.0268	0.45647	0.23	FALSE	TRUE	TRUE	JNuRkj	0.0229	0.2425	11615	outcome	TRUE	reported	textfile	RPL36AL	1.2e-43	0.0353684	exposure	TRUE	reported	o3DQQ9	textfile	2	FALSE
rs2076172	T	C	T	C	-0.19	0.0009	0.439082	0.55	FALSE	FALSE	FALSE	JNuRkj	0.0197	0.9623	11615	outcome	TRUE	reported	textfile	RPL10A	2.3e-08	0.0340028	exposure	TRUE	reported	o3DQQ9	textfile	2	TRUE
rs2283616	C	A	C	A	-0.27	-0.0139	0.293223	0.59	FALSE	FALSE	FALSE	JNuRkj	0.0197	0.4809	11615	outcome	TRUE	reported	textfile	UBA52	1e-14	0.0348871	exposure	TRUE	reported	o3DQQ9	textfile	2	TRUE
rs2286466	G	A	G	A	-0.29	-0.015	0.126148	0.81	FALSE	FALSE	FALSE	JNuRkj	0.0293	0.6085	8583	outcome	TRUE	reported	textfile	RPS2	1.1e-14	0.0375301	exposure	TRUE	reported	o3DQQ9	textfile	2	TRUE
rs2305158	A	G	A	G	-0.19	-0.0223	0.208549	0.22	FALSE	FALSE	FALSE	JNuRkj	0.0229	0.3308	11615	outcome	TRUE	reported	textfile	RPL31	1.5e-08	0.0335596	exposure	TRUE	reported	o3DQQ9	textfile	2	TRUE
rs2668014	A	G	A	G	0.17	-0.0188	0.165196	0.23	FALSE	FALSE	FALSE	JNuRkj	0.0233	0.4197	11615	outcome	TRUE	reported	textfile	RPS20	7.3e-09	0.0293921	exposure	TRUE	reported	o3DQQ9	textfile	2	TRUE
rs2687967	A	G	A	G	-0.83	0.0276	0.351855	0.7	FALSE	FALSE	FALSE	JNuRkj	0.0208	0.1841	11615	outcome	TRUE	reported	textfile	RPL9	2.5e-89	0.0414185	exposure	TRUE	reported	o3DQQ9	textfile	2	TRUE
rs2815301	C	T	C	T	-1.2	-0.0191	0.150642	0.78	FALSE	FALSE	FALSE	JNuRkj	0.0316	0.5462	8018	outcome	TRUE	reported	textfile	RPL3L	4.8e-65	0.0704579	exposure	TRUE	reported	o3DQQ9	textfile	2	TRUE
rs28450916	T	C	T	C	-0.23	-0.0713	0.113183	0.07	FALSE	FALSE	FALSE	JNuRkj	0.0407	0.07992	11615	outcome	TRUE	reported	textfile	RPL34	9.1e-05	0.0587722	exposure	TRUE	reported	o3DQQ9	textfile	2	TRUE
rs2954658	T	C	T	C	-0.35	-0.0128	0.422902	0.51	FALSE	FALSE	FALSE	JNuRkj	0.0204	0.5307	11050	outcome	TRUE	reported	textfile	RPL8	2.4e-29	0.0311198	exposure	TRUE	reported	o3DQQ9	textfile	2	TRUE
rs34057012	A	G	A	G	0.13	0.0057	0.38589	0.33	FALSE	FALSE	FALSE	JNuRkj	0.0207	0.7822	11615	outcome	TRUE	reported	textfile	RPL13	1e-05	0.0294306	exposure	TRUE	reported	o3DQQ9	textfile	2	TRUE
rs34503349	G	A	G	A	-0.47	0.0453	0.071228	0.07	FALSE	FALSE	FALSE	JNuRkj	0.039	0.2454	11615	outcome	TRUE	reported	textfile	RPS3	3.3e-21	0.0497209	exposure	TRUE	reported	o3DQQ9	textfile	2	TRUE
rs3738	C	A	C	A	-0.42	-0.0045	0.32623	0.31	FALSE	FALSE	FALSE	JNuRkj	0.0208	0.8299	11615	outcome	TRUE	reported	textfile	RPS23	3.8e-30	0.0368152	exposure	TRUE	reported	o3DQQ9	textfile	2	TRUE
rs3772146	T	C	T	C	-0.44	0.0186	0.280194	0.34	FALSE	FALSE	FALSE	JNuRkj	0.0203	0.3579	11615	outcome	TRUE	reported	textfile	RPSA	4.3e-43	0.0319715	exposure	TRUE	reported	o3DQQ9	textfile	2	TRUE
rs45572040	C	G	C	G	-0.44	-0.0455	0.047256	0.07	FALSE	TRUE	FALSE	JNuRkj	0.0425	0.2847	11075	outcome	TRUE	reported	textfile	RPL28	1.8e-06	0.0921529	exposure	TRUE	reported	o3DQQ9	textfile	2	TRUE
rs4841	T	C	T	C	-0.17	0.0142	0.264877	0.26	FALSE	FALSE	FALSE	JNuRkj	0.0223	0.5251	11050	outcome	TRUE	reported	textfile	RPS14	3e-05	0.0407335	exposure	TRUE	reported	o3DQQ9	textfile	2	TRUE
rs580077	C	T	C	T	-0.15	0.0002	0.477963	0.5	FALSE	FALSE	FALSE	JNuRkj	0.0195	0.9902	11615	outcome	TRUE	reported	textfile	RPS3	1.7e-06	0.0313403	exposure	TRUE	reported	o3DQQ9	textfile	2	TRUE
rs60766209	A	C	A	C	0.17	0.0166	0.201653	0.21	FALSE	FALSE	FALSE	JNuRkj	0.0234	0.4759	11615	outcome	TRUE	reported	textfile	RPS8	1.1e-06	0.0348872	exposure	TRUE	reported	o3DQQ9	textfile	2	TRUE
rs61939011	A	G	A	G	0.95	0.0137	0.039273	0.06	FALSE	FALSE	FALSE	JNuRkj	0.0585	0.8148	7822	outcome	TRUE	reported	textfile	RPS26	3.3e-08	0.171954	exposure	TRUE	reported	o3DQQ9	textfile	2	TRUE
rs62128216	T	C	T	C	0.36	-0.0272	0.05293	0.07	FALSE	FALSE	FALSE	JNuRkj	0.0502	0.5882	10510	outcome	TRUE	reported	textfile	RPL28	1.5e-05	0.0831661	exposure	TRUE	reported	o3DQQ9	textfile	2	TRUE
rs6572634	A	C	A	C	0.15	-0.0115	0.462776	0.46	FALSE	FALSE	FALSE	JNuRkj	0.02	0.5679	11050	outcome	TRUE	reported	textfile	RPL36AL	3.1e-05	0.0360058	exposure	TRUE	reported	o3DQQ9	textfile	2	TRUE
rs6597982	A	G	A	G	0.16	0.0082	0.28902	0.68	FALSE	FALSE	FALSE	JNuRkj	0.0213	0.7	11615	outcome	TRUE	reported	textfile	RPLP2	8.3e-06	0.0358962	exposure	TRUE	reported	o3DQQ9	textfile	2	TRUE
rs66718279	T	C	T	C	-0.16	-0.013	0.428731	0.63	FALSE	FALSE	FALSE	JNuRkj	0.0226	0.5667	11050	outcome	TRUE	reported	textfile	RPS7	3.2e-07	0.0313034	exposure	TRUE	reported	o3DQQ9	textfile	2	TRUE
rs67627137	G	C	G	C	-0.24	0.0205	0.291534	0.38	FALSE	TRUE	FALSE	JNuRkj	0.0196	0.2972	11615	outcome	TRUE	reported	textfile	RPS9	4.7e-13	0.033178	exposure	TRUE	reported	o3DQQ9	textfile	2	TRUE
rs67723215	C	A	C	A	-0.27	0.0101	0.163248	0.17	FALSE	FALSE	FALSE	JNuRkj	0.0263	0.6994	11615	outcome	TRUE	reported	textfile	RPL13	1.8e-12	0.0383024	exposure	TRUE	reported	o3DQQ9	textfile	2	TRUE
rs71459332	T	C	T	C	0.7	0.0654	0.043766	0.06	FALSE	FALSE	FALSE	JNuRkj	0.0393	0.09626	11615	outcome	TRUE	reported	textfile	RPS26	2e-05	0.164131	exposure	TRUE	reported	o3DQQ9	textfile	2	TRUE
rs71522403	G	C	G	C	0.24	0.0613	0.086265	0.13	FALSE	TRUE	FALSE	JNuRkj	0.0398	0.1232	10510	outcome	TRUE	reported	textfile	RPL8	2.6e-06	0.0510625	exposure	TRUE	reported	o3DQQ9	textfile	2	TRUE
rs7169648	C	A	C	A	-0.35	0.004	0.136401	0.09	FALSE	FALSE	FALSE	JNuRkj	0.0332	0.9039	11615	outcome	TRUE	reported	textfile	RPS27L	1.3e-07	0.0663024	exposure	TRUE	reported	o3DQQ9	textfile	2	TRUE
rs72697662	T	C	T	C	-0.21	-0.0423	0.10014	0.09	FALSE	FALSE	FALSE	JNuRkj	0.0437	0.3323	10510	outcome	TRUE	reported	textfile	RPL8	5.8e-05	0.0522284	exposure	TRUE	reported	o3DQQ9	textfile	2	TRUE
rs72766611	A	G	A	G	-0.51	-0.0231	0.232912	0.27	FALSE	FALSE	FALSE	JNuRkj	0.0234	0.3255	11615	outcome	TRUE	reported	textfile	RPL3L	1.6e-08	0.0902578	exposure	TRUE	reported	o3DQQ9	textfile	2	TRUE
rs72779276	G	C	G	C	0.4	-0.0087	0.169496	0.26	FALSE	TRUE	FALSE	JNuRkj	0.0308	0.7773	10510	outcome	TRUE	reported	textfile	RPL3L	2.3e-05	0.0944827	exposure	TRUE	reported	o3DQQ9	textfile	2	TRUE
rs72995445	A	G	A	G	0.3	0.0148	0.040603	0.06	FALSE	FALSE	FALSE	JNuRkj	0.0468	0.7515	11615	outcome	TRUE	reported	textfile	UBA52	6.7e-05	0.0752503	exposure	TRUE	reported	o3DQQ9	textfile	2	TRUE
rs73137481	A	G	A	G	0.52	-0.0274	0.12449	0.04	FALSE	FALSE	FALSE	JNuRkj	0.0547	0.617	11202	outcome	TRUE	reported	textfile	RPL9	2.7e-06	0.110817	exposure	TRUE	reported	o3DQQ9	textfile	2	TRUE
rs73238594	A	G	A	G	-0.58	-0.0442	0.034493	0.04	FALSE	FALSE	FALSE	JNuRkj	0.0541	0.4137	10867	outcome	TRUE	reported	textfile	RPL9	1.3e-05	0.133024	exposure	TRUE	reported	o3DQQ9	textfile	2	TRUE
rs75143485	T	C	T	C	0.91	-0.1462	0.022397	0.02	FALSE	FALSE	FALSE	JNuRkj	0.0973	0.1328	7226	outcome	TRUE	reported	textfile	RPS26	0.00014	0.23896	exposure	TRUE	reported	o3DQQ9	textfile	2	TRUE
rs76687611	A	G	A	G	0.31	-0.0419	0.046582	0.05	FALSE	FALSE	FALSE	JNuRkj	0.0488	0.3904	10892	outcome	TRUE	reported	textfile	RPL13A	4.3e-08	0.0565893	exposure	TRUE	reported	o3DQQ9	textfile	2	TRUE
rs77102251	G	C	G	C	-0.64	0.0104	0.044661	0.06	FALSE	TRUE	FALSE	JNuRkj	0.0487	0.8303	11050	outcome	TRUE	reported	textfile	RPL9	3.4e-06	0.137781	exposure	TRUE	reported	o3DQQ9	textfile	2	TRUE
rs7740758	T	G	T	G	-0.16	0.0313	0.268118	0.22	FALSE	FALSE	FALSE	JNuRkj	0.0246	0.2033	11615	outcome	TRUE	reported	textfile	RPL10A	5.8e-05	0.039793	exposure	TRUE	reported	o3DQQ9	textfile	2	TRUE
rs77616581	T	C	T	C	1.1	0.0159	0.01033	0.02	FALSE	FALSE	FALSE	JNuRkj	0.0846	0.8509	10249	outcome	TRUE	reported	textfile	RPS27L	6.2e-05	0.274652	exposure	TRUE	reported	o3DQQ9	textfile	2	TRUE
rs78296340	T	C	T	C	-0.3	0.0466	0.097426	0.04	FALSE	FALSE	FALSE	JNuRkj	0.0512	0.3629	11432	outcome	TRUE	reported	textfile	RPS3A	4.1e-06	0.0651289	exposure	TRUE	reported	o3DQQ9	textfile	2	TRUE
rs78462005	C	T	C	T	0.17	0.0068	0.250352	0.34	FALSE	FALSE	FALSE	JNuRkj	0.0265	0.7986	9820	outcome	TRUE	reported	textfile	RPL36AL	7.1e-06	0.0378563	exposure	TRUE	reported	o3DQQ9	textfile	2	TRUE
rs7849608	A	G	A	G	0.25	0.0171	0.155253	0.1	FALSE	FALSE	FALSE	JNuRkj	0.0313	0.5847	11615	outcome	TRUE	reported	textfile	RPL12	4.3e-07	0.0494543	exposure	TRUE	reported	o3DQQ9	textfile	2	TRUE
rs79191137	G	T	G	T	-0.45	0.0948	0.026988	0.03	FALSE	FALSE	FALSE	JNuRkj	0.06	0.1139	10740	outcome	TRUE	reported	textfile	RPS18	2.9e-08	0.0811195	exposure	TRUE	reported	o3DQQ9	textfile	2	TRUE
rs80288693	G	A	G	A	0.35	-0.0198	0.043703	0.03	FALSE	FALSE	FALSE	JNuRkj	0.0743	0.7897	10613	outcome	TRUE	reported	textfile	RPS13	2.1e-05	0.0822758	exposure	TRUE	reported	o3DQQ9	textfile	2	TRUE
rs8108030	A	G	A	G	-0.4	-0.054	0.061955	0.02	FALSE	FALSE	FALSE	JNuRkj	0.0925	0.5594	10249	outcome	TRUE	reported	textfile	RPL18A	3.3e-06	0.0859992	exposure	TRUE	reported	o3DQQ9	textfile	2	TRUE
rs9099	G	A	G	A	0.32	-0.0087	0.127821	0.13	FALSE	FALSE	FALSE	JNuRkj	0.0291	0.7664	11615	outcome	TRUE	reported	textfile	RPS23	7.6e-09	0.0553911	exposure	TRUE	reported	o3DQQ9	textfile	2	TRUE
rs938203	G	A	G	A	0.29	0.0032	0.147998	0.87	FALSE	FALSE	FALSE	JNuRkj	0.0297	0.9127	11615	outcome	TRUE	reported	textfile	RPSA	9.1e-10	0.0473512	exposure	TRUE	reported	o3DQQ9	textfile	2	TRUE
rs9471951	G	A	G	A	-0.25	-0.0138	0.199023	0.27	FALSE	FALSE	FALSE	JNuRkj	0.0218	0.5247	11615	outcome	TRUE	reported	textfile	RPL7L1	3.3e-11	0.0376931	exposure	TRUE	reported	o3DQQ9	textfile	2	TRUE
rs9995998	T	C	T	C	-0.32	0.0001	0.19885	0.17	FALSE	FALSE	FALSE	JNuRkj	0.0251	0.9954	11615	outcome	TRUE	reported	textfile	RPL9	1.1e-06	0.06567	exposure	TRUE	reported	o3DQQ9	textfile	2	TRUE
Pancreas-Longevity 99p
SNP	effect_allele.exposure	other_allele.exposure	effect_allele.outcome	other_allele.outcome	beta.exposure	beta.outcome	eaf.exposure	eaf.outcome	remove	palindromic	ambiguous	id.outcome	se.outcome	pval.outcome	samplesize.outcome	outcome	mr_keep.outcome	pval_origin.outcome	data_source.outcome	gene.exposure	pval.exposure	se.exposure	exposure	mr_keep.exposure	pval_origin.exposure	id.exposure	data_source.exposure	action	mr_keep
rs10421495	G	A	G	A	-0.19	0.0145	0.455109	0.54	FALSE	FALSE	FALSE	d9fKqq	0.0318	0.6475	4524	outcome	TRUE	reported	textfile	RPS28	6.3e-07	0.0381389	exposure	TRUE	reported	o3DQQ9	textfile	2	TRUE
rs1057232	A	G	A	G	-0.43	0.0167	0.41518	0.55	FALSE	FALSE	FALSE	d9fKqq	0.0303	0.5814	4524	outcome	TRUE	reported	textfile	RPS28	3.3e-34	0.03526	exposure	TRUE	reported	o3DQQ9	textfile	2	TRUE
rs10987645	G	C	G	C	0.3	0.001	0.375016	0.42	FALSE	TRUE	FALSE	d9fKqq	0.0307	0.975	4524	outcome	TRUE	reported	textfile	RPL12	1.5e-21	0.0314633	exposure	TRUE	reported	o3DQQ9	textfile	2	TRUE
rs11171744	C	G	C	G	-0.55	-0.0466	0.092302	0.14	FALSE	TRUE	FALSE	d9fKqq	0.0562	0.4071	4000	outcome	TRUE	reported	textfile	RPS26	1.8e-05	0.128254	exposure	TRUE	reported	o3DQQ9	textfile	2	TRUE
rs11171773	G	A	G	A	-0.61	0.0533	0.226101	0.92	FALSE	FALSE	FALSE	d9fKqq	0.0654	0.4152	4303	outcome	TRUE	reported	textfile	RPS26	3.8e-06	0.131977	exposure	TRUE	reported	o3DQQ9	textfile	2	TRUE
rs111804650	T	C	T	C	0.19	-0.1456	0.07426	0.08	FALSE	FALSE	FALSE	d9fKqq	0.0581	0.01228	4303	outcome	TRUE	reported	textfile	RPS25	6.7e-06	0.0421941	exposure	TRUE	reported	o3DQQ9	textfile	2	TRUE
rs112110624	A	G	A	G	0.34	-0.1403	0.01877	0.03	FALSE	FALSE	FALSE	d9fKqq	0.1061	0.1863	3915	outcome	TRUE	reported	textfile	RPL37	8.2e-05	0.0863278	exposure	TRUE	reported	o3DQQ9	textfile	2	TRUE
rs1131017	G	C	G	C	-1.2	0.022	0.444089	0.42	FALSE	TRUE	TRUE	d9fKqq	0.0304	0.47	4524	outcome	TRUE	reported	textfile	RPS26	5.5e-156	0.0450994	exposure	TRUE	reported	o3DQQ9	textfile	2	FALSE
rs113235151	T	C	T	C	-0.29	0.0309	0.044072	0.05	FALSE	FALSE	FALSE	d9fKqq	0.0816	0.705	3812	outcome	TRUE	reported	textfile	RPL27A	1.1e-05	0.0659612	exposure	TRUE	reported	o3DQQ9	textfile	2	TRUE
rs113703216	G	T	G	T	-0.28	0.0398	0.024561	0.07	FALSE	FALSE	FALSE	d9fKqq	0.0649	0.5396	4303	outcome	TRUE	reported	textfile	RPS2	1.2e-05	0.0639622	exposure	TRUE	reported	o3DQQ9	textfile	2	TRUE
rs113775775	C	T	C	T	-1	0.1951	0.012484	0.02	FALSE	FALSE	FALSE	d9fKqq	0.1456	0.1801	2902	outcome	TRUE	reported	textfile	RPL10A	8.4e-11	0.154006	exposure	TRUE	reported	o3DQQ9	textfile	2	TRUE
rs114584454	G	T	G	T	-0.23	0.0574	0.192964	0.19	FALSE	FALSE	FALSE	d9fKqq	0.0396	0.147	4524	outcome	TRUE	reported	textfile	RPSA	1.4e-07	0.0436827	exposure	TRUE	reported	o3DQQ9	textfile	2	TRUE
rs115675705	G	A	G	A	0.32	-0.2337	0.022034	0.03	FALSE	FALSE	FALSE	d9fKqq	0.1228	0.05701	3322	outcome	TRUE	reported	textfile	RPS10	3.5e-05	0.0773278	exposure	TRUE	reported	o3DQQ9	textfile	2	TRUE
rs116585983	A	G	A	G	0.81	0.0317	0.0145	0.02	FALSE	FALSE	FALSE	d9fKqq	0.1491	0.8314	2829	outcome	TRUE	reported	textfile	RPL9	5.8e-05	0.201452	exposure	TRUE	reported	o3DQQ9	textfile	2	TRUE
rs116640761	A	G	A	G	-0.46	-0.0156	0.012555	0.03	FALSE	FALSE	FALSE	d9fKqq	0.1299	0.9044	3322	outcome	TRUE	reported	textfile	RPSA	1.1e-05	0.104628	exposure	TRUE	reported	o3DQQ9	textfile	2	TRUE
rs11727177	G	A	G	A	0.59	-0.0146	0.053014	0.06	FALSE	FALSE	FALSE	d9fKqq	0.0667	0.8266	4303	outcome	TRUE	reported	textfile	RPL9	3.2e-06	0.126676	exposure	TRUE	reported	o3DQQ9	textfile	2	TRUE
rs117312206	G	A	G	A	-0.48	0.1066	0.0443	0.07	FALSE	FALSE	FALSE	d9fKqq	0.0657	0.1047	4303	outcome	TRUE	reported	textfile	RPL28	6.9e-09	0.0828538	exposure	TRUE	reported	o3DQQ9	textfile	2	TRUE
rs117396149	A	G	A	G	1.2	-0.0933	0.026158	0.03	FALSE	FALSE	FALSE	d9fKqq	0.1555	0.5484	2371	outcome	TRUE	reported	textfile	RPS26	3e-06	0.256914	exposure	TRUE	reported	o3DQQ9	textfile	2	TRUE
rs11777703	A	G	A	G	-0.15	-0.0192	0.495267	0.47	FALSE	FALSE	FALSE	d9fKqq	0.0325	0.5542	4524	outcome	TRUE	reported	textfile	RPL8	2.9e-05	0.035875	exposure	TRUE	reported	o3DQQ9	textfile	2	TRUE
rs11858705	A	T	A	T	-0.18	0.0683	0.346026	0.26	FALSE	TRUE	FALSE	d9fKqq	0.0343	0.04657	4524	outcome	TRUE	reported	textfile	RPS27L	1.4e-05	0.0414378	exposure	TRUE	reported	o3DQQ9	textfile	2	TRUE
rs12120833	G	C	G	C	-0.35	-0.0135	0.10548	0.12	FALSE	TRUE	FALSE	d9fKqq	0.0513	0.7924	4154	outcome	TRUE	reported	textfile	RPS8	6.7e-14	0.0467064	exposure	TRUE	reported	o3DQQ9	textfile	2	TRUE
rs12185167	T	C	T	C	0.19	0.0634	0.074681	0.2	FALSE	FALSE	FALSE	d9fKqq	0.0594	0.2858	2851	outcome	TRUE	reported	textfile	RPS2	1.2e-06	0.0391298	exposure	TRUE	reported	o3DQQ9	textfile	2	TRUE
rs12441911	G	A	G	A	-0.16	0.038	0.315426	0.25	FALSE	FALSE	FALSE	d9fKqq	0.0376	0.3114	4154	outcome	TRUE	reported	textfile	RPS27L	6.5e-05	0.0400613	exposure	TRUE	reported	o3DQQ9	textfile	2	TRUE
rs12881290	A	C	A	C	-0.31	-0.0519	0.079118	0.08	FALSE	FALSE	FALSE	d9fKqq	0.0748	0.4879	3812	outcome	TRUE	reported	textfile	RPL36AL	3.5e-06	0.0668239	exposure	TRUE	reported	o3DQQ9	textfile	2	TRUE
rs13072532	T	C	T	C	-0.33	0.0787	0.056412	0.08	FALSE	FALSE	FALSE	d9fKqq	0.0723	0.2762	3812	outcome	TRUE	reported	textfile	RPSA	2.5e-05	0.0782955	exposure	TRUE	reported	o3DQQ9	textfile	2	TRUE
rs13098237	C	T	C	T	0.2	-0.039	0.243496	0.24	FALSE	FALSE	FALSE	d9fKqq	0.0386	0.3131	4154	outcome	TRUE	reported	textfile	RPSA	1.1e-06	0.0410437	exposure	TRUE	reported	o3DQQ9	textfile	2	TRUE
rs1384256	A	G	A	G	0.19	-0.0095	0.499423	0.47	FALSE	FALSE	FALSE	d9fKqq	0.0298	0.7488	4524	outcome	TRUE	reported	textfile	RPS23	4e-06	0.0412024	exposure	TRUE	reported	o3DQQ9	textfile	2	TRUE
rs141027594	T	C	T	C	0.27	0.1197	0.040669	0.03	FALSE	FALSE	FALSE	d9fKqq	0.1428	0.4017	2829	outcome	TRUE	reported	textfile	RPS8	3.6e-05	0.0653475	exposure	TRUE	reported	o3DQQ9	textfile	2	TRUE
rs144131441	C	G	C	G	-0.83	0.0085	0.049579	0.07	FALSE	TRUE	FALSE	d9fKqq	0.0687	0.901	4303	outcome	TRUE	reported	textfile	RPS26	3.6e-07	0.163098	exposure	TRUE	reported	o3DQQ9	textfile	2	TRUE
rs145044106	C	G	C	G	-0.57	-0.0619	0.008986	0.03	FALSE	TRUE	FALSE	d9fKqq	0.1269	0.6259	3692	outcome	TRUE	reported	textfile	RPS18	2.1e-06	0.120163	exposure	TRUE	reported	o3DQQ9	textfile	2	TRUE
rs149874092	C	G	C	G	0.42	-0.0084	0.127796	0.15	FALSE	TRUE	FALSE	d9fKqq	0.053	0.8747	4154	outcome	TRUE	reported	textfile	RPS26	5e-05	0.10356	exposure	TRUE	reported	o3DQQ9	textfile	2	TRUE
rs17700376	G	A	G	A	-0.61	0.0228	0.296294	0.36	FALSE	FALSE	FALSE	d9fKqq	0.031	0.4617	4524	outcome	TRUE	reported	textfile	RPL28	3.9e-53	0.0397556	exposure	TRUE	reported	o3DQQ9	textfile	2	TRUE
rs184240697	T	C	T	C	-0.53	0.1385	0.017325	0.02	FALSE	FALSE	FALSE	d9fKqq	0.1695	0.4136	2297	outcome	TRUE	reported	textfile	RPL36AL	5.4e-05	0.131266	exposure	TRUE	reported	o3DQQ9	textfile	2	TRUE
rs184655294	A	G	A	G	-0.64	0.2595	0.014333	0.02	FALSE	FALSE	FALSE	d9fKqq	0.1344	0.05359	3322	outcome	TRUE	reported	textfile	RPL28	1.5e-05	0.147851	exposure	TRUE	reported	o3DQQ9	textfile	2	TRUE
rs1860236	C	A	C	A	-0.42	-0.0648	0.244209	0.15	FALSE	FALSE	FALSE	d9fKqq	0.0497	0.1927	4154	outcome	TRUE	reported	textfile	RPL3L	1.2e-05	0.0959432	exposure	TRUE	reported	o3DQQ9	textfile	2	TRUE
rs1863897	T	C	T	C	0.19	-0.0554	0.493642	0.59	FALSE	FALSE	FALSE	d9fKqq	0.033	0.09299	4154	outcome	TRUE	reported	textfile	RPS24	2.6e-09	0.0319057	exposure	TRUE	reported	o3DQQ9	textfile	2	TRUE
rs193864	C	A	C	A	-0.12	-0.0548	0.32298	0.69	FALSE	FALSE	FALSE	d9fKqq	0.0321	0.08726	4524	outcome	TRUE	reported	textfile	RPL37	2.7e-05	0.0285891	exposure	TRUE	reported	o3DQQ9	textfile	2	TRUE
rs1952013	G	C	G	C	0.49	0.0283	0.45647	0.23	FALSE	TRUE	TRUE	d9fKqq	0.0357	0.4268	4524	outcome	TRUE	reported	textfile	RPL36AL	1.2e-43	0.0353684	exposure	TRUE	reported	o3DQQ9	textfile	2	FALSE
rs2076172	T	C	T	C	-0.19	-0.039	0.439082	0.53	FALSE	FALSE	FALSE	d9fKqq	0.0307	0.2044	4524	outcome	TRUE	reported	textfile	RPL10A	2.3e-08	0.0340028	exposure	TRUE	reported	o3DQQ9	textfile	2	TRUE
rs2283616	C	A	C	A	-0.27	-0.0284	0.293223	0.58	FALSE	FALSE	FALSE	d9fKqq	0.031	0.3586	4524	outcome	TRUE	reported	textfile	UBA52	1e-14	0.0348871	exposure	TRUE	reported	o3DQQ9	textfile	2	TRUE
rs2286466	G	A	G	A	-0.29	-0.0554	0.126148	0.8	FALSE	FALSE	FALSE	d9fKqq	0.0477	0.245	2750	outcome	TRUE	reported	textfile	RPS2	1.1e-14	0.0375301	exposure	TRUE	reported	o3DQQ9	textfile	2	TRUE
rs2305158	A	G	A	G	-0.19	-0.0499	0.208549	0.23	FALSE	FALSE	FALSE	d9fKqq	0.0358	0.164	4524	outcome	TRUE	reported	textfile	RPL31	1.5e-08	0.0335596	exposure	TRUE	reported	o3DQQ9	textfile	2	TRUE
rs2668014	A	G	A	G	0.17	-0.0422	0.165196	0.24	FALSE	FALSE	FALSE	d9fKqq	0.036	0.2412	4524	outcome	TRUE	reported	textfile	RPS20	7.3e-09	0.0293921	exposure	TRUE	reported	o3DQQ9	textfile	2	TRUE
rs2687967	A	G	A	G	-0.83	0.041	0.351855	0.71	FALSE	FALSE	FALSE	d9fKqq	0.0328	0.2119	4524	outcome	TRUE	reported	textfile	RPL9	2.5e-89	0.0414185	exposure	TRUE	reported	o3DQQ9	textfile	2	TRUE
rs2815301	C	T	C	T	-1.2	-0.0623	0.150642	0.78	FALSE	FALSE	FALSE	d9fKqq	0.0529	0.2386	2873	outcome	TRUE	reported	textfile	RPL3L	4.8e-65	0.0704579	exposure	TRUE	reported	o3DQQ9	textfile	2	TRUE
rs28450916	T	C	T	C	-0.23	-0.0753	0.113183	0.07	FALSE	FALSE	FALSE	d9fKqq	0.0644	0.2419	4303	outcome	TRUE	reported	textfile	RPL34	9.1e-05	0.0587722	exposure	TRUE	reported	o3DQQ9	textfile	2	TRUE
rs2954658	T	C	T	C	-0.35	-0.0187	0.422902	0.51	FALSE	FALSE	FALSE	d9fKqq	0.0329	0.5703	4154	outcome	TRUE	reported	textfile	RPL8	2.4e-29	0.0311198	exposure	TRUE	reported	o3DQQ9	textfile	2	TRUE
rs34057012	A	G	A	G	0.13	0.0229	0.38589	0.31	FALSE	FALSE	FALSE	d9fKqq	0.0325	0.4811	4524	outcome	TRUE	reported	textfile	RPL13	1e-05	0.0294306	exposure	TRUE	reported	o3DQQ9	textfile	2	TRUE
rs34503349	G	A	G	A	-0.47	0.0748	0.071228	0.07	FALSE	FALSE	FALSE	d9fKqq	0.0614	0.2232	4303	outcome	TRUE	reported	textfile	RPS3	3.3e-21	0.0497209	exposure	TRUE	reported	o3DQQ9	textfile	2	TRUE
rs3738	C	A	C	A	-0.42	-0.0055	0.32623	0.32	FALSE	FALSE	FALSE	d9fKqq	0.0321	0.8642	4524	outcome	TRUE	reported	textfile	RPS23	3.8e-30	0.0368152	exposure	TRUE	reported	o3DQQ9	textfile	2	TRUE
rs3772146	T	C	T	C	-0.44	0.0274	0.280194	0.35	FALSE	FALSE	FALSE	d9fKqq	0.0315	0.3835	4524	outcome	TRUE	reported	textfile	RPSA	4.3e-43	0.0319715	exposure	TRUE	reported	o3DQQ9	textfile	2	TRUE
rs45572040	C	G	C	G	-0.44	0.041	0.047256	0.07	FALSE	TRUE	FALSE	d9fKqq	0.064	0.5218	4303	outcome	TRUE	reported	textfile	RPL28	1.8e-06	0.0921529	exposure	TRUE	reported	o3DQQ9	textfile	2	TRUE
rs4841	T	C	T	C	-0.17	0.0206	0.264877	0.25	FALSE	FALSE	FALSE	d9fKqq	0.0363	0.5708	4154	outcome	TRUE	reported	textfile	RPS14	3e-05	0.0407335	exposure	TRUE	reported	o3DQQ9	textfile	2	TRUE
rs580077	C	T	C	T	-0.15	0.0281	0.477963	0.5	FALSE	FALSE	FALSE	d9fKqq	0.0306	0.3583	4524	outcome	TRUE	reported	textfile	RPS3	1.7e-06	0.0313403	exposure	TRUE	reported	o3DQQ9	textfile	2	TRUE
rs60766209	A	C	A	C	0.17	0.0258	0.201653	0.21	FALSE	FALSE	FALSE	d9fKqq	0.0369	0.484	4524	outcome	TRUE	reported	textfile	RPS8	1.1e-06	0.0348872	exposure	TRUE	reported	o3DQQ9	textfile	2	TRUE
rs61939011	A	G	A	G	0.95	0.1103	0.039273	0.07	FALSE	FALSE	FALSE	d9fKqq	0.0854	0.1966	3680	outcome	TRUE	reported	textfile	RPS26	3.3e-08	0.171954	exposure	TRUE	reported	o3DQQ9	textfile	2	TRUE
rs62128216	T	C	T	C	0.36	0.0513	0.05293	0.07	FALSE	FALSE	FALSE	d9fKqq	0.0848	0.5454	3680	outcome	TRUE	reported	textfile	RPL28	1.5e-05	0.0831661	exposure	TRUE	reported	o3DQQ9	textfile	2	TRUE
rs6572634	A	C	A	C	0.15	-0.0427	0.462776	0.46	FALSE	FALSE	FALSE	d9fKqq	0.0323	0.1861	4154	outcome	TRUE	reported	textfile	RPL36AL	3.1e-05	0.0360058	exposure	TRUE	reported	o3DQQ9	textfile	2	TRUE
rs6597982	A	G	A	G	0.16	-0.0018	0.28902	0.67	FALSE	FALSE	FALSE	d9fKqq	0.0331	0.9558	4524	outcome	TRUE	reported	textfile	RPLP2	8.3e-06	0.0358962	exposure	TRUE	reported	o3DQQ9	textfile	2	TRUE
rs66718279	T	C	T	C	-0.16	-0.0109	0.428731	0.63	FALSE	FALSE	FALSE	d9fKqq	0.0362	0.7623	4154	outcome	TRUE	reported	textfile	RPS7	3.2e-07	0.0313034	exposure	TRUE	reported	o3DQQ9	textfile	2	TRUE
rs67627137	G	C	G	C	-0.24	0.0324	0.291534	0.37	FALSE	TRUE	FALSE	d9fKqq	0.0311	0.2972	4524	outcome	TRUE	reported	textfile	RPS9	4.7e-13	0.033178	exposure	TRUE	reported	o3DQQ9	textfile	2	TRUE
rs67723215	C	A	C	A	-0.27	-0.0159	0.163248	0.18	FALSE	FALSE	FALSE	d9fKqq	0.0405	0.6943	4524	outcome	TRUE	reported	textfile	RPL13	1.8e-12	0.0383024	exposure	TRUE	reported	o3DQQ9	textfile	2	TRUE
rs71459332	T	C	T	C	0.7	0.0193	0.043766	0.06	FALSE	FALSE	FALSE	d9fKqq	0.0627	0.7579	4303	outcome	TRUE	reported	textfile	RPS26	2e-05	0.164131	exposure	TRUE	reported	o3DQQ9	textfile	2	TRUE
rs71522403	G	C	G	C	0.24	0.0704	0.086265	0.13	FALSE	TRUE	FALSE	d9fKqq	0.0632	0.2656	3879	outcome	TRUE	reported	textfile	RPL8	2.6e-06	0.0510625	exposure	TRUE	reported	o3DQQ9	textfile	2	TRUE
rs7169648	C	A	C	A	-0.35	0.0597	0.136401	0.1	FALSE	FALSE	FALSE	d9fKqq	0.0509	0.241	4524	outcome	TRUE	reported	textfile	RPS27L	1.3e-07	0.0663024	exposure	TRUE	reported	o3DQQ9	textfile	2	TRUE
rs72697662	T	C	T	C	-0.21	-0.0195	0.10014	0.08	FALSE	FALSE	FALSE	d9fKqq	0.0703	0.7816	3879	outcome	TRUE	reported	textfile	RPL8	5.8e-05	0.0522284	exposure	TRUE	reported	o3DQQ9	textfile	2	TRUE
rs72766611	A	G	A	G	-0.51	-0.0455	0.232912	0.25	FALSE	FALSE	FALSE	d9fKqq	0.0377	0.228	4524	outcome	TRUE	reported	textfile	RPL3L	1.6e-08	0.0902578	exposure	TRUE	reported	o3DQQ9	textfile	2	TRUE
rs72779276	G	C	G	C	0.4	0.0211	0.169496	0.26	FALSE	TRUE	FALSE	d9fKqq	0.0495	0.6697	4154	outcome	TRUE	reported	textfile	RPL3L	2.3e-05	0.0944827	exposure	TRUE	reported	o3DQQ9	textfile	2	TRUE
rs72995445	A	G	A	G	0.3	0.0066	0.040603	0.06	FALSE	FALSE	FALSE	d9fKqq	0.0787	0.9327	4182	outcome	TRUE	reported	textfile	UBA52	6.7e-05	0.0752503	exposure	TRUE	reported	o3DQQ9	textfile	2	TRUE
rs73137481	A	G	A	G	0.52	0.0284	0.12449	0.04	FALSE	FALSE	FALSE	d9fKqq	0.0889	0.749	3915	outcome	TRUE	reported	textfile	RPL9	2.7e-06	0.110817	exposure	TRUE	reported	o3DQQ9	textfile	2	TRUE
rs73238594	A	G	A	G	-0.58	-0.0929	0.034493	0.04	FALSE	FALSE	FALSE	d9fKqq	0.0951	0.3287	3545	outcome	TRUE	reported	textfile	RPL9	1.3e-05	0.133024	exposure	TRUE	reported	o3DQQ9	textfile	2	TRUE
rs75143485	T	C	T	C	0.91	-0.0927	0.022397	0.02	FALSE	FALSE	FALSE	d9fKqq	0.1625	0.5686	2829	outcome	TRUE	reported	textfile	RPS26	0.00014	0.23896	exposure	TRUE	reported	o3DQQ9	textfile	2	TRUE
rs76687611	A	G	A	G	0.31	-0.1484	0.046582	0.05	FALSE	FALSE	FALSE	d9fKqq	0.0774	0.05513	4050	outcome	TRUE	reported	textfile	RPL13A	4.3e-08	0.0565893	exposure	TRUE	reported	o3DQQ9	textfile	2	TRUE
rs77102251	G	C	G	C	-0.64	0.0909	0.044661	0.06	FALSE	TRUE	FALSE	d9fKqq	0.0815	0.2648	3666	outcome	TRUE	reported	textfile	RPL9	3.4e-06	0.137781	exposure	TRUE	reported	o3DQQ9	textfile	2	TRUE
rs7740758	T	G	T	G	-0.16	0.0122	0.268118	0.21	FALSE	FALSE	FALSE	d9fKqq	0.0372	0.7419	4524	outcome	TRUE	reported	textfile	RPL10A	5.8e-05	0.039793	exposure	TRUE	reported	o3DQQ9	textfile	2	TRUE
rs77616581	T	C	T	C	1.1	-0.1289	0.01033	0.02	FALSE	FALSE	FALSE	d9fKqq	0.1322	0.3295	3692	outcome	TRUE	reported	textfile	RPS27L	6.2e-05	0.274652	exposure	TRUE	reported	o3DQQ9	textfile	2	TRUE
rs78296340	T	C	T	C	-0.3	0.006	0.097426	0.04	FALSE	FALSE	FALSE	d9fKqq	0.0796	0.9395	3915	outcome	TRUE	reported	textfile	RPS3A	4.1e-06	0.0651289	exposure	TRUE	reported	o3DQQ9	textfile	2	TRUE
rs78462005	C	T	C	T	0.17	0.0236	0.250352	0.35	FALSE	FALSE	FALSE	d9fKqq	0.0402	0.5574	4033	outcome	TRUE	reported	textfile	RPL36AL	7.1e-06	0.0378563	exposure	TRUE	reported	o3DQQ9	textfile	2	TRUE
rs7849608	A	G	A	G	0.25	-0.0224	0.155253	0.11	FALSE	FALSE	FALSE	d9fKqq	0.0492	0.6493	4524	outcome	TRUE	reported	textfile	RPL12	4.3e-07	0.0494543	exposure	TRUE	reported	o3DQQ9	textfile	2	TRUE
rs79191137	G	T	G	T	-0.45	0.0892	0.026988	0.03	FALSE	FALSE	FALSE	d9fKqq	0.1006	0.3751	3915	outcome	TRUE	reported	textfile	RPS18	2.9e-08	0.0811195	exposure	TRUE	reported	o3DQQ9	textfile	2	TRUE
rs80288693	G	A	G	A	0.35	0.0277	0.043703	0.03	FALSE	FALSE	FALSE	d9fKqq	0.119	0.8159	3199	outcome	TRUE	reported	textfile	RPS13	2.1e-05	0.0822758	exposure	TRUE	reported	o3DQQ9	textfile	2	TRUE
rs8108030	A	G	A	G	-0.4	-0.1698	0.061955	0.03	FALSE	FALSE	FALSE	d9fKqq	0.1486	0.2532	3160	outcome	TRUE	reported	textfile	RPL18A	3.3e-06	0.0859992	exposure	TRUE	reported	o3DQQ9	textfile	2	TRUE
rs9099	G	A	G	A	0.32	-0.0111	0.127821	0.13	FALSE	FALSE	FALSE	d9fKqq	0.0455	0.808	4524	outcome	TRUE	reported	textfile	RPS23	7.6e-09	0.0553911	exposure	TRUE	reported	o3DQQ9	textfile	2	TRUE
rs938203	G	A	G	A	0.29	0.008	0.147998	0.87	FALSE	FALSE	FALSE	d9fKqq	0.0456	0.8601	4524	outcome	TRUE	reported	textfile	RPSA	9.1e-10	0.0473512	exposure	TRUE	reported	o3DQQ9	textfile	2	TRUE
rs9471951	G	A	G	A	-0.25	-0.0106	0.199023	0.28	FALSE	FALSE	FALSE	d9fKqq	0.0336	0.7527	4524	outcome	TRUE	reported	textfile	RPL7L1	3.3e-11	0.0376931	exposure	TRUE	reported	o3DQQ9	textfile	2	TRUE
rs9995998	T	C	T	C	-0.32	0.0127	0.19885	0.18	FALSE	FALSE	FALSE	d9fKqq	0.0393	0.7464	4524	outcome	TRUE	reported	textfile	RPL9	1.1e-06	0.06567	exposure	TRUE	reported	o3DQQ9	textfile	2	TRUE
Muscle skeletal-Longevity 90p
SNP	effect_allele.exposure	other_allele.exposure	effect_allele.outcome	other_allele.outcome	beta.exposure	beta.outcome	eaf.exposure	eaf.outcome	remove	palindromic	ambiguous	id.outcome	se.outcome	pval.outcome	samplesize.outcome	outcome	mr_keep.outcome	pval_origin.outcome	data_source.outcome	gene.exposure	pval.exposure	se.exposure	exposure	mr_keep.exposure	pval_origin.exposure	id.exposure	data_source.exposure	action	mr_keep
rs10042896	A	G	A	G	0.14	-0.008	0.47224	0.47	FALSE	FALSE	FALSE	j4dYB6	0.0193	0.6801	11615	outcome	TRUE	reported	textfile	RPS23	5.8e-11	0.0213779	exposure	TRUE	reported	nG2eib	textfile	2	TRUE
rs10118605	C	T	C	T	-0.068	0.0171	0.495053	0.55	FALSE	FALSE	FALSE	j4dYB6	0.0203	0.3995	11050	outcome	TRUE	reported	textfile	RPS6	4.6e-05	0.0166868	exposure	TRUE	reported	nG2eib	textfile	2	TRUE
rs10123714	T	C	T	C	0.069	0.0227	0.448057	0.51	FALSE	FALSE	FALSE	j4dYB6	0.0195	0.2442	11615	outcome	TRUE	reported	textfile	RPS6	4.2e-05	0.0168449	exposure	TRUE	reported	nG2eib	textfile	2	TRUE
rs10408981	G	C	G	C	-0.11	-0.0433	0.442171	0.4	FALSE	TRUE	TRUE	j4dYB6	0.0226	0.0554	11050	outcome	TRUE	reported	textfile	RPS16	4.3e-05	0.02689	exposure	TRUE	reported	nG2eib	textfile	2	FALSE
rs10419111	C	T	C	T	-0.072	0.0131	0.479493	0.63	FALSE	FALSE	FALSE	j4dYB6	0.0201	0.5161	11615	outcome	TRUE	reported	textfile	RPS19	1.3e-05	0.0165134	exposure	TRUE	reported	nG2eib	textfile	2	TRUE
rs1057232	A	G	A	G	-0.24	0.0368	0.41518	0.55	FALSE	FALSE	FALSE	j4dYB6	0.0198	0.0636	11075	outcome	TRUE	reported	textfile	RPS28	2e-36	0.0190412	exposure	TRUE	reported	nG2eib	textfile	2	TRUE
rs10757059	C	A	C	A	0.07	-0.0193	0.485972	0.43	FALSE	FALSE	FALSE	j4dYB6	0.0204	0.3447	11615	outcome	TRUE	reported	textfile	RPS6	3.3e-05	0.0168605	exposure	TRUE	reported	nG2eib	textfile	2	TRUE
rs10876864	A	G	A	G	-0.95	-0.0136	0.495485	0.59	FALSE	FALSE	FALSE	j4dYB6	0.0195	0.4839	11615	outcome	TRUE	reported	textfile	RPS26	1e-200	0.0285372	exposure	TRUE	reported	nG2eib	textfile	2	TRUE
rs11099756	G	A	G	A	0.13	-0.0076	0.095489	0.08	FALSE	FALSE	FALSE	j4dYB6	0.0376	0.8398	11615	outcome	TRUE	reported	textfile	RPS3A	9.7e-05	0.0333506	exposure	TRUE	reported	nG2eib	textfile	2	TRUE
rs11171744	C	G	C	G	-0.32	-0.0302	0.092302	0.14	FALSE	TRUE	FALSE	j4dYB6	0.0358	0.3986	10510	outcome	TRUE	reported	textfile	RPS26	9.9e-07	0.0653913	exposure	TRUE	reported	nG2eib	textfile	2	TRUE
rs11171773	G	A	G	A	-0.48	0.024	0.226101	0.93	FALSE	FALSE	FALSE	j4dYB6	0.0424	0.5705	11615	outcome	TRUE	reported	textfile	RPS26	6.7e-12	0.069931	exposure	TRUE	reported	nG2eib	textfile	2	TRUE
rs11217124	G	A	G	A	-0.21	-0.0556	0.29206	0.25	FALSE	FALSE	FALSE	j4dYB6	0.0224	0.01317	11615	outcome	TRUE	reported	textfile	RPS25	1.8e-33	0.0174185	exposure	TRUE	reported	nG2eib	textfile	2	TRUE
rs11217307	G	A	G	A	0.07	-0.019	0.46418	0.58	FALSE	FALSE	FALSE	j4dYB6	0.0206	0.3584	11050	outcome	TRUE	reported	textfile	RPS25	7.3e-05	0.0176487	exposure	TRUE	reported	nG2eib	textfile	2	TRUE
rs112244905	T	G	T	G	-0.47	-0.028	0.02317	0.03	FALSE	FALSE	FALSE	j4dYB6	0.0819	0.7327	8994	outcome	TRUE	reported	textfile	RPS26	0.00018	0.125482	exposure	TRUE	reported	nG2eib	textfile	2	TRUE
rs11236430	C	T	C	T	-0.093	0.0144	0.371396	0.61	FALSE	FALSE	FALSE	j4dYB6	0.0201	0.4737	11615	outcome	TRUE	reported	textfile	RPS3	1.2e-05	0.0212446	exposure	TRUE	reported	nG2eib	textfile	2	TRUE
rs112721139	G	A	G	A	-0.28	0.0497	0.015031	0.03	FALSE	FALSE	FALSE	j4dYB6	0.086	0.5637	8048	outcome	TRUE	reported	textfile	RPSA	8e-05	0.0709867	exposure	TRUE	reported	nG2eib	textfile	2	TRUE
rs1129460	C	A	C	A	-0.15	-0.0014	0.098977	0.26	FALSE	FALSE	FALSE	j4dYB6	0.0385	0.9707	7492	outcome	TRUE	reported	textfile	RPS11	2.3e-08	0.0268443	exposure	TRUE	reported	nG2eib	textfile	2	TRUE
rs113636971	G	A	G	A	-0.28	0.1086	0.076913	0.08	FALSE	FALSE	FALSE	j4dYB6	0.0487	0.02571	11050	outcome	TRUE	reported	textfile	RPS3	6.2e-11	0.0428211	exposure	TRUE	reported	nG2eib	textfile	2	TRUE
rs113681805	A	T	A	T	0.13	0.0033	0.1343	0.15	FALSE	TRUE	FALSE	j4dYB6	0.0283	0.9069	11615	outcome	TRUE	reported	textfile	RPS20	1.3e-06	0.0268609	exposure	TRUE	reported	nG2eib	textfile	2	TRUE
rs113883332	C	T	C	T	-0.35	0.0003	0.013833	0.02	FALSE	FALSE	FALSE	j4dYB6	0.0802	0.9971	9765	outcome	TRUE	reported	textfile	RPS16	9.6e-05	0.0897324	exposure	TRUE	reported	nG2eib	textfile	2	TRUE
rs114584454	G	T	G	T	-0.16	0.0155	0.192964	0.2	FALSE	FALSE	FALSE	j4dYB6	0.025	0.536	11615	outcome	TRUE	reported	textfile	RPSA	4.8e-09	0.0273319	exposure	TRUE	reported	nG2eib	textfile	2	TRUE
rs11558965	T	G	T	G	-0.19	0.0087	0.051874	0.07	FALSE	FALSE	FALSE	j4dYB6	0.0499	0.8617	10202	outcome	TRUE	reported	textfile	RPS7	4.8e-08	0.0348077	exposure	TRUE	reported	nG2eib	textfile	2	TRUE
rs11614512	T	C	T	C	0.3	0.0055	0.073322	0.12	FALSE	FALSE	FALSE	j4dYB6	0.0451	0.9034	8512	outcome	TRUE	reported	textfile	RPS26	5.1e-06	0.0657804	exposure	TRUE	reported	nG2eib	textfile	2	TRUE
rs116547500	C	G	C	G	-0.4	-0.0102	0.01699	0.03	FALSE	TRUE	FALSE	j4dYB6	0.0645	0.8739	11209	outcome	TRUE	reported	textfile	RPSA	4.1e-12	0.0576893	exposure	TRUE	reported	nG2eib	textfile	2	TRUE
rs11671409	C	G	C	G	-0.3	-0.0472	0.026542	0.04	FALSE	TRUE	FALSE	j4dYB6	0.0575	0.4122	11432	outcome	TRUE	reported	textfile	RPS16	2.4e-05	0.0710227	exposure	TRUE	reported	nG2eib	textfile	2	TRUE
rs117396149	A	G	A	G	0.63	-0.033	0.026158	0.03	FALSE	FALSE	FALSE	j4dYB6	0.089	0.7109	7385	outcome	TRUE	reported	textfile	RPS26	3e-10	0.100019	exposure	TRUE	reported	nG2eib	textfile	2	TRUE
rs11750053	A	C	A	C	-0.11	0.0047	0.24042	0.31	FALSE	FALSE	FALSE	j4dYB6	0.0216	0.8273	11615	outcome	TRUE	reported	textfile	RPS23	1.9e-05	0.025723	exposure	TRUE	reported	nG2eib	textfile	2	TRUE
rs117506357	A	G	A	G	0.13	0.0087	0.083795	0.1	FALSE	FALSE	FALSE	j4dYB6	0.0487	0.8575	9175	outcome	TRUE	reported	textfile	RPS15A	0.00011	0.0336143	exposure	TRUE	reported	nG2eib	textfile	2	TRUE
rs117833207	C	G	C	G	-0.18	-0.0178	0.027157	0.07	FALSE	TRUE	FALSE	j4dYB6	0.0673	0.7919	8336	outcome	TRUE	reported	textfile	RPS28	4e-05	0.0438225	exposure	TRUE	reported	nG2eib	textfile	2	TRUE
rs118067691	G	T	G	T	0.45	-0.0171	0.026594	0.04	FALSE	FALSE	FALSE	j4dYB6	0.0639	0.7887	10510	outcome	TRUE	reported	textfile	RPS26	1.4e-05	0.103594	exposure	TRUE	reported	nG2eib	textfile	2	TRUE
rs12417071	A	G	A	G	-0.21	0.01	0.041868	0.05	FALSE	FALSE	FALSE	j4dYB6	0.0473	0.8321	11615	outcome	TRUE	reported	textfile	RPS3	1.1e-05	0.0477651	exposure	TRUE	reported	nG2eib	textfile	2	TRUE
rs12527381	C	G	C	G	0.096	0.0191	0.249665	0.12	FALSE	TRUE	FALSE	j4dYB6	0.0303	0.5292	11615	outcome	TRUE	reported	textfile	RPS10	1.8e-05	0.0223862	exposure	TRUE	reported	nG2eib	textfile	2	TRUE
rs12609253	C	G	C	G	0.13	0.0114	0.444834	0.37	FALSE	TRUE	TRUE	j4dYB6	0.0205	0.5793	11615	outcome	TRUE	reported	textfile	RPS16	4.5e-07	0.0257605	exposure	TRUE	reported	nG2eib	textfile	2	FALSE
rs12658240	T	C	T	C	0.13	-0.0254	0.199281	0.23	FALSE	FALSE	FALSE	j4dYB6	0.0226	0.2608	11615	outcome	TRUE	reported	textfile	RPS23	8.6e-07	0.0264161	exposure	TRUE	reported	nG2eib	textfile	2	TRUE
rs12662460	G	C	G	C	0.17	0.0369	0.083737	0.03	FALSE	TRUE	FALSE	j4dYB6	0.0657	0.5747	11202	outcome	TRUE	reported	textfile	RPS10	9.7e-05	0.0436124	exposure	TRUE	reported	nG2eib	textfile	2	TRUE
rs13807	A	G	A	G	0.35	-0.0017	0.009903	0.01	FALSE	FALSE	FALSE	j4dYB6	0.1112	0.9876	7987	outcome	TRUE	reported	textfile	FAU	9.7e-06	0.0791183	exposure	TRUE	reported	nG2eib	textfile	2	TRUE
rs138077206	T	C	T	C	0.36	0.044	0.021159	0.03	FALSE	FALSE	FALSE	j4dYB6	0.0683	0.5189	10171	outcome	TRUE	reported	textfile	RPS16	1.9e-06	0.0755703	exposure	TRUE	reported	nG2eib	textfile	2	TRUE
rs140116753	G	A	G	A	0.59	-0.0096	0.038063	0.06	FALSE	FALSE	FALSE	j4dYB6	0.0558	0.8629	10202	outcome	TRUE	reported	textfile	RPS26	3e-13	0.080884	exposure	TRUE	reported	nG2eib	textfile	2	TRUE
rs141311291	G	A	G	A	0.2	-0.0395	0.015508	0.02	FALSE	FALSE	FALSE	j4dYB6	0.093	0.6707	9303	outcome	TRUE	reported	textfile	RPS21	5.4e-05	0.0495343	exposure	TRUE	reported	nG2eib	textfile	2	TRUE
rs141600894	C	T	C	T	-0.18	-0.0158	0.015412	0.02	FALSE	FALSE	FALSE	j4dYB6	0.09	0.8609	7478	outcome	TRUE	reported	textfile	RPS17	0.00014	0.0472668	exposure	TRUE	reported	nG2eib	textfile	2	TRUE
rs142856921	A	G	A	G	0.37	-0.069	0.011418	0.02	FALSE	FALSE	FALSE	j4dYB6	0.108	0.5229	7664	outcome	TRUE	reported	textfile	RPS20	1.2e-07	0.0698971	exposure	TRUE	reported	nG2eib	textfile	2	TRUE
rs143572577	A	G	A	G	0.56	0.027	0.010731	0.02	FALSE	FALSE	FALSE	j4dYB6	0.107	0.8011	8454	outcome	TRUE	reported	textfile	RPS26	0.00013	0.146349	exposure	TRUE	reported	nG2eib	textfile	2	TRUE
rs144131441	C	G	C	G	-0.46	-0.0377	0.049579	0.07	FALSE	TRUE	FALSE	j4dYB6	0.0421	0.3702	11615	outcome	TRUE	reported	textfile	RPS26	5.8e-10	0.0742442	exposure	TRUE	reported	nG2eib	textfile	2	TRUE
rs145044106	C	G	C	G	-0.49	0.1198	0.008986	0.02	FALSE	TRUE	FALSE	j4dYB6	0.083	0.1487	10305	outcome	TRUE	reported	textfile	RPS18	5.2e-08	0.0900018	exposure	TRUE	reported	nG2eib	textfile	2	TRUE
rs147809373	C	T	C	T	-0.22	-0.1487	0.0381	0.03	FALSE	FALSE	FALSE	j4dYB6	0.0811	0.06683	9200	outcome	TRUE	reported	textfile	RPS2	2.6e-05	0.052307	exposure	TRUE	reported	nG2eib	textfile	2	TRUE
rs149326047	C	T	C	T	0.24	-0.0425	0.033103	0.03	FALSE	FALSE	FALSE	j4dYB6	0.0716	0.5524	10454	outcome	TRUE	reported	textfile	RPS16	0.0001	0.0616873	exposure	TRUE	reported	nG2eib	textfile	2	TRUE
rs149874092	C	G	C	G	0.2	0.0301	0.127796	0.15	FALSE	TRUE	FALSE	j4dYB6	0.0321	0.3479	11050	outcome	TRUE	reported	textfile	RPS26	0.00017	0.0531933	exposure	TRUE	reported	nG2eib	textfile	2	TRUE
rs150823486	A	G	A	G	-0.45	0.0219	0.045469	0.06	FALSE	FALSE	FALSE	j4dYB6	0.0593	0.7121	10510	outcome	TRUE	reported	textfile	RPS26	2.1e-07	0.0867008	exposure	TRUE	reported	nG2eib	textfile	2	TRUE
rs166252	C	T	C	T	-0.19	-0.0277	0.36199	0.65	FALSE	FALSE	FALSE	j4dYB6	0.0265	0.2967	11050	outcome	TRUE	reported	textfile	RPS9	1.2e-21	0.0198785	exposure	TRUE	reported	nG2eib	textfile	2	TRUE
rs16832210	G	A	G	A	-0.22	-0.012	0.10612	0.13	FALSE	FALSE	FALSE	j4dYB6	0.0305	0.6928	11050	outcome	TRUE	reported	textfile	RPS8	6.8e-19	0.02478	exposure	TRUE	reported	nG2eib	textfile	2	TRUE
rs17135716	G	A	G	A	0.26	-0.0385	0.097711	0.12	FALSE	FALSE	FALSE	j4dYB6	0.0331	0.2436	9735	outcome	TRUE	reported	textfile	RPS2	2e-12	0.0369608	exposure	TRUE	reported	nG2eib	textfile	2	TRUE
rs173665	A	G	A	G	0.2	-0.0194	0.107111	0.1	FALSE	FALSE	FALSE	j4dYB6	0.0361	0.5909	11075	outcome	TRUE	reported	textfile	RPS28	1.2e-09	0.0328934	exposure	TRUE	reported	nG2eib	textfile	2	TRUE
rs17555056	G	C	G	C	-0.3	-0.0189	0.204714	0.11	FALSE	TRUE	FALSE	j4dYB6	0.0317	0.5505	11615	outcome	TRUE	reported	textfile	RPS11	1.6e-40	0.0225097	exposure	TRUE	reported	nG2eib	textfile	2	TRUE
rs17793056	T	C	T	C	0.084	-0.0052	0.463702	0.52	FALSE	FALSE	FALSE	j4dYB6	0.0201	0.7966	11050	outcome	TRUE	reported	textfile	RPSA	0.00013	0.0219524	exposure	TRUE	reported	nG2eib	textfile	2	TRUE
rs183425427	A	C	A	C	0.81	0.0114	0.011461	0.02	FALSE	FALSE	FALSE	j4dYB6	0.1008	0.9097	9144	outcome	TRUE	reported	textfile	RPS26	1.7e-05	0.188327	exposure	TRUE	reported	nG2eib	textfile	2	TRUE
rs1860236	C	A	C	A	-0.23	-0.0528	0.244209	0.15	FALSE	FALSE	FALSE	j4dYB6	0.0308	0.0867	10510	outcome	TRUE	reported	textfile	RPS2	1.7e-14	0.0299811	exposure	TRUE	reported	nG2eib	textfile	2	TRUE
rs1865960	T	C	T	C	-0.18	0.0257	0.09963	0.08	FALSE	FALSE	FALSE	j4dYB6	0.0374	0.4923	11615	outcome	TRUE	reported	textfile	RPS5	6.5e-09	0.0310165	exposure	TRUE	reported	nG2eib	textfile	2	TRUE
rs1963311	T	C	T	C	0.15	-0.0031	0.131303	0.14	FALSE	FALSE	FALSE	j4dYB6	0.0289	0.9148	11615	outcome	TRUE	reported	textfile	RPS23	2.1e-06	0.0316218	exposure	TRUE	reported	nG2eib	textfile	2	TRUE
rs2037276	A	G	A	G	-0.087	0.0334	0.292339	0.26	FALSE	FALSE	FALSE	j4dYB6	0.022	0.1282	11615	outcome	TRUE	reported	textfile	RPS27L	0.00014	0.0228456	exposure	TRUE	reported	nG2eib	textfile	2	TRUE
rs2056993	T	C	T	C	-0.16	-0.0061	0.200342	0.05	FALSE	FALSE	FALSE	j4dYB6	0.0486	0.8995	10202	outcome	TRUE	reported	textfile	RPS2	4.6e-05	0.0392631	exposure	TRUE	reported	nG2eib	textfile	2	TRUE
rs2069398	A	G	A	G	0.48	0.0257	0.124896	0.08	FALSE	FALSE	FALSE	j4dYB6	0.0379	0.4988	11615	outcome	TRUE	reported	textfile	RPS26	2.4e-12	0.0684832	exposure	TRUE	reported	nG2eib	textfile	2	TRUE
rs210157	T	C	T	C	-0.098	0.0053	0.391636	0.36	FALSE	FALSE	FALSE	j4dYB6	0.0199	0.7918	11615	outcome	TRUE	reported	textfile	RPS18	6.2e-05	0.024469	exposure	TRUE	reported	nG2eib	textfile	2	TRUE
rs2236070	T	C	T	C	0.081	-0.02	0.165996	0.22	FALSE	FALSE	FALSE	j4dYB6	0.0253	0.4289	11615	outcome	TRUE	reported	textfile	RPS21	5.1e-05	0.0199951	exposure	TRUE	reported	nG2eib	textfile	2	TRUE
rs2241787	C	T	C	T	-0.14	0.0375	0.445721	0.4	FALSE	FALSE	FALSE	j4dYB6	0.0202	0.06295	11615	outcome	TRUE	reported	textfile	RPS5	5.8e-16	0.0172979	exposure	TRUE	reported	nG2eib	textfile	2	TRUE
rs224912	T	C	T	C	0.14	-0.0412	0.152936	0.15	FALSE	FALSE	FALSE	j4dYB6	0.0277	0.1371	11615	outcome	TRUE	reported	textfile	RPS23	2.1e-06	0.0295137	exposure	TRUE	reported	nG2eib	textfile	2	TRUE
rs2286466	G	A	G	A	-0.18	-0.015	0.126148	0.81	FALSE	FALSE	FALSE	j4dYB6	0.0293	0.6085	8583	outcome	TRUE	reported	textfile	RPS2	2.2e-10	0.0283613	exposure	TRUE	reported	nG2eib	textfile	2	TRUE
rs2304216	T	C	T	C	-0.26	-0.0087	0.056741	0.08	FALSE	FALSE	FALSE	j4dYB6	0.0408	0.8309	11615	outcome	TRUE	reported	textfile	RPS16	3e-07	0.0507471	exposure	TRUE	reported	nG2eib	textfile	2	TRUE
rs2304222	G	A	G	A	0.29	-0.0156	0.039552	0.05	FALSE	FALSE	FALSE	j4dYB6	0.0491	0.7506	11615	outcome	TRUE	reported	textfile	RPS16	3.9e-06	0.0628162	exposure	TRUE	reported	nG2eib	textfile	2	TRUE
rs2304523	T	G	T	G	0.3	-0.0552	0.28129	0.16	FALSE	FALSE	FALSE	j4dYB6	0.0267	0.03879	11615	outcome	TRUE	reported	textfile	RPS9	9e-40	0.0227306	exposure	TRUE	reported	nG2eib	textfile	2	TRUE
rs251906	G	C	G	C	0.18	-0.0413	0.237832	0.09	FALSE	TRUE	FALSE	j4dYB6	0.0351	0.2397	11615	outcome	TRUE	reported	textfile	RPS16	4.4e-05	0.0440593	exposure	TRUE	reported	nG2eib	textfile	2	TRUE
rs2770995	G	C	G	C	-0.19	0.0234	0.151982	0.04	FALSE	TRUE	FALSE	j4dYB6	0.0549	0.6704	11050	outcome	TRUE	reported	textfile	RACK1	8.9e-07	0.0386609	exposure	TRUE	reported	nG2eib	textfile	2	TRUE
rs2771000	A	C	A	C	-0.16	-0.0087	0.150443	0.16	FALSE	FALSE	FALSE	j4dYB6	0.0273	0.7498	11050	outcome	TRUE	reported	textfile	RACK1	4.3e-11	0.0242669	exposure	TRUE	reported	nG2eib	textfile	2	TRUE
rs28394803	C	A	C	A	-0.19	0	0.16185	0.09	FALSE	FALSE	FALSE	j4dYB6	0.0331	0.9998	11615	outcome	TRUE	reported	textfile	RPS27L	5.2e-10	0.0305813	exposure	TRUE	reported	nG2eib	textfile	2	TRUE
rs28582623	G	A	G	A	0.068	-0.0077	0.20097	0.2	FALSE	FALSE	FALSE	j4dYB6	0.0245	0.754	11615	outcome	TRUE	reported	textfile	RPS17	2.1e-05	0.015985	exposure	TRUE	reported	nG2eib	textfile	2	TRUE
rs28771971	C	T	C	T	-0.086	-0.0618	0.367523	0.27	FALSE	FALSE	FALSE	j4dYB6	0.0267	0.02048	10510	outcome	TRUE	reported	textfile	RPS28	8.8e-05	0.0219304	exposure	TRUE	reported	nG2eib	textfile	2	TRUE
rs3133186	C	T	C	T	-0.53	0.0391	0.071802	0.07	FALSE	FALSE	FALSE	j4dYB6	0.0388	0.3137	11615	outcome	TRUE	reported	textfile	RPS3	9.8e-45	0.0377683	exposure	TRUE	reported	nG2eib	textfile	2	TRUE
rs34350479	A	G	A	G	0.31	-0.0283	0.074359	0.06	FALSE	FALSE	FALSE	j4dYB6	0.0434	0.5137	11075	outcome	TRUE	reported	textfile	RPS16	2e-10	0.0487319	exposure	TRUE	reported	nG2eib	textfile	2	TRUE
rs34940771	A	G	A	G	-0.099	-0.0598	0.112237	0.15	FALSE	FALSE	FALSE	j4dYB6	0.0272	0.02786	11615	outcome	TRUE	reported	textfile	RPS17	5.8e-07	0.0198089	exposure	TRUE	reported	nG2eib	textfile	2	TRUE
rs3738	C	A	C	A	-0.39	-0.0045	0.32623	0.31	FALSE	FALSE	FALSE	j4dYB6	0.0208	0.8299	11615	outcome	TRUE	reported	textfile	RPS23	6.3e-72	0.0217453	exposure	TRUE	reported	nG2eib	textfile	2	TRUE
rs3740253	T	C	T	C	0.093	-0.0243	0.476134	0.61	FALSE	FALSE	FALSE	j4dYB6	0.02	0.2244	11615	outcome	TRUE	reported	textfile	RPS24	8.3e-09	0.0161395	exposure	TRUE	reported	nG2eib	textfile	2	TRUE
rs3772143	G	T	G	T	-0.28	0.0083	0.491733	0.51	FALSE	FALSE	FALSE	j4dYB6	0.0194	0.6676	11615	outcome	TRUE	reported	textfile	RPSA	4e-43	0.0203378	exposure	TRUE	reported	nG2eib	textfile	2	TRUE
rs3795718	A	G	A	G	0.12	0.0236	0.144793	0.18	FALSE	FALSE	FALSE	j4dYB6	0.0252	0.348	11615	outcome	TRUE	reported	textfile	RPS8	1.7e-09	0.0199198	exposure	TRUE	reported	nG2eib	textfile	2	TRUE
rs4016657	A	G	A	G	-0.26	0.1207	0.035748	0.03	FALSE	FALSE	FALSE	j4dYB6	0.0592	0.04161	11432	outcome	TRUE	reported	textfile	RPSA	6.8e-05	0.0652745	exposure	TRUE	reported	nG2eib	textfile	2	TRUE
rs41270113	T	A	T	A	0.34	-0.0475	0.061308	0.08	FALSE	TRUE	FALSE	j4dYB6	0.039	0.2232	11615	outcome	TRUE	reported	textfile	RPS6	1.5e-24	0.0332451	exposure	TRUE	reported	nG2eib	textfile	2	TRUE
rs4417323	G	C	G	C	0.25	0.0404	0.188984	0.25	FALSE	TRUE	FALSE	j4dYB6	0.0312	0.1949	10510	outcome	TRUE	reported	textfile	RPS26	8.7e-08	0.0467117	exposure	TRUE	reported	nG2eib	textfile	2	TRUE
rs4803255	G	A	G	A	0.16	-0.0079	0.2287	0.7	FALSE	FALSE	FALSE	j4dYB6	0.0215	0.7132	11615	outcome	TRUE	reported	textfile	RPS16	1.1e-09	0.0262546	exposure	TRUE	reported	nG2eib	textfile	2	TRUE
rs555031	T	C	T	C	0.096	-0.0163	0.425165	0.51	FALSE	FALSE	FALSE	j4dYB6	0.0232	0.4818	11050	outcome	TRUE	reported	textfile	RPS3	6.2e-06	0.0212415	exposure	TRUE	reported	nG2eib	textfile	2	TRUE
rs56145082	G	C	G	C	0.35	-0.0082	0.049365	0.04	FALSE	TRUE	FALSE	j4dYB6	0.0492	0.8673	11615	outcome	TRUE	reported	textfile	RPS16	3.7e-06	0.0756338	exposure	TRUE	reported	nG2eib	textfile	2	TRUE
rs57317131	C	G	C	G	-0.09	0.0046	0.32294	0.37	FALSE	TRUE	FALSE	j4dYB6	0.0327	0.8893	8130	outcome	TRUE	reported	textfile	RPS9	1.1e-05	0.0204707	exposure	TRUE	reported	nG2eib	textfile	2	TRUE
rs58525086	T	C	T	C	0.23	0.0307	0.084136	0.03	FALSE	FALSE	FALSE	j4dYB6	0.0591	0.6037	11019	outcome	TRUE	reported	textfile	RPS10	8.9e-11	0.0354689	exposure	TRUE	reported	nG2eib	textfile	2	TRUE
rs60454884	A	G	A	G	0.1	0.0184	0.106869	0.14	FALSE	FALSE	FALSE	j4dYB6	0.0432	0.6707	9050	outcome	TRUE	reported	textfile	RPS21	6.3e-06	0.0221432	exposure	TRUE	reported	nG2eib	textfile	2	TRUE
rs6089349	A	G	A	G	0.07	-0.0231	0.456079	0.69	FALSE	FALSE	FALSE	j4dYB6	0.0212	0.2755	11615	outcome	TRUE	reported	textfile	RPS21	5.1e-05	0.0172797	exposure	TRUE	reported	nG2eib	textfile	2	TRUE
rs6089356	T	C	T	C	0.11	-0.0286	0.177369	0.21	FALSE	FALSE	FALSE	j4dYB6	0.0268	0.2862	11075	outcome	TRUE	reported	textfile	RPS21	6.6e-08	0.0203638	exposure	TRUE	reported	nG2eib	textfile	2	TRUE
rs61937720	T	C	T	C	-0.17	0.0469	0.347442	0.41	FALSE	FALSE	FALSE	j4dYB6	0.0197	0.01733	11615	outcome	TRUE	reported	textfile	RPS26	3e-05	0.0407335	exposure	TRUE	reported	nG2eib	textfile	2	TRUE
rs62044176	A	G	A	G	0.15	0.0091	0.328527	0.41	FALSE	FALSE	FALSE	j4dYB6	0.0218	0.6752	11050	outcome	TRUE	reported	textfile	RPS15A	9.1e-16	0.0186604	exposure	TRUE	reported	nG2eib	textfile	2	TRUE
rs62120664	A	C	A	C	-0.23	-0.0265	0.16092	0.17	FALSE	FALSE	FALSE	j4dYB6	0.0263	0.3131	11615	outcome	TRUE	reported	textfile	RPS16	5.1e-12	0.03332	exposure	TRUE	reported	nG2eib	textfile	2	TRUE
rs62366359	G	A	G	A	0.28	-0.0426	0.019796	0.03	FALSE	FALSE	FALSE	j4dYB6	0.0796	0.593	10146	outcome	TRUE	reported	textfile	RPS23	0.00017	0.0744706	exposure	TRUE	reported	nG2eib	textfile	2	TRUE
rs62425114	T	C	T	C	0.16	0.0048	0.058076	0.07	FALSE	FALSE	FALSE	j4dYB6	0.037	0.8972	11615	outcome	TRUE	reported	textfile	RPS12	4.3e-06	0.0348104	exposure	TRUE	reported	nG2eib	textfile	2	TRUE
rs640000	T	C	T	C	0.57	0.0083	0.455599	0.35	FALSE	FALSE	FALSE	j4dYB6	0.0206	0.6871	11615	outcome	TRUE	reported	textfile	RPS16	6.7e-171	0.0204543	exposure	TRUE	reported	nG2eib	textfile	2	TRUE
rs6474049	C	T	C	T	0.1	-0.024	0.173254	0.86	FALSE	FALSE	FALSE	j4dYB6	0.0366	0.512	11050	outcome	TRUE	reported	textfile	RPS20	0.00022	0.0270646	exposure	TRUE	reported	nG2eib	textfile	2	TRUE
rs6589695	G	C	G	C	0.18	-0.0278	0.0265	0.04	FALSE	TRUE	FALSE	j4dYB6	0.0582	0.6334	11432	outcome	TRUE	reported	textfile	RPS25	5.8e-05	0.0447672	exposure	TRUE	reported	nG2eib	textfile	2	TRUE
rs66491720	A	G	A	G	0.23	0.0363	0.103424	0.14	FALSE	FALSE	FALSE	j4dYB6	0.0352	0.3033	10588	outcome	TRUE	reported	textfile	RPS26	0.00013	0.0601078	exposure	TRUE	reported	nG2eib	textfile	2	TRUE
rs676703	T	C	T	C	-0.099	-0.0055	0.435522	0.51	FALSE	FALSE	FALSE	j4dYB6	0.0195	0.779	11615	outcome	TRUE	reported	textfile	RPS3	1.3e-06	0.0204556	exposure	TRUE	reported	nG2eib	textfile	2	TRUE
rs6882993	T	C	T	C	-0.14	0.0314	0.148959	0.09	FALSE	FALSE	FALSE	j4dYB6	0.0341	0.3566	11615	outcome	TRUE	reported	textfile	RPS23	8.2e-05	0.0355467	exposure	TRUE	reported	nG2eib	textfile	2	TRUE
rs6904716	G	A	G	A	-0.094	0.0501	0.448657	0.44	FALSE	FALSE	FALSE	j4dYB6	0.0191	0.008786	11615	outcome	TRUE	reported	textfile	RPS18	3.3e-05	0.0226413	exposure	TRUE	reported	nG2eib	textfile	2	TRUE
rs7112048	C	T	C	T	0.093	0.0164	0.4549	0.58	FALSE	FALSE	FALSE	j4dYB6	0.0206	0.426	11615	outcome	TRUE	reported	textfile	RPS3	2.1e-05	0.0218619	exposure	TRUE	reported	nG2eib	textfile	2	TRUE
rs71365433	T	C	T	C	-0.15	-0.0021	0.075196	0.11	FALSE	FALSE	FALSE	j4dYB6	0.0495	0.9661	8130	outcome	TRUE	reported	textfile	RPS9	2.2e-06	0.0316848	exposure	TRUE	reported	nG2eib	textfile	2	TRUE
rs71449679	C	T	C	T	0.1	0.0158	0.195788	0.17	FALSE	FALSE	FALSE	j4dYB6	0.0257	0.5381	11615	outcome	TRUE	reported	textfile	RPS7	6.6e-06	0.0221917	exposure	TRUE	reported	nG2eib	textfile	2	TRUE
rs71459348	T	C	T	C	-0.62	0.1704	0.022554	0.03	FALSE	FALSE	FALSE	j4dYB6	0.1004	0.0899	5848	outcome	TRUE	reported	textfile	RPS26	4.8e-07	0.123159	exposure	TRUE	reported	nG2eib	textfile	2	TRUE
rs7254178	T	C	T	C	-0.19	-0.0554	0.05356	0.94	FALSE	FALSE	FALSE	j4dYB6	0.0422	0.1893	11615	outcome	TRUE	reported	textfile	RPS5	2.9e-07	0.0370383	exposure	TRUE	reported	nG2eib	textfile	2	TRUE
rs72642278	T	C	T	C	-0.44	0.0861	0.040669	0.02	FALSE	FALSE	FALSE	j4dYB6	0.0678	0.2041	11019	outcome	TRUE	reported	textfile	RPS24	7e-23	0.0446796	exposure	TRUE	reported	nG2eib	textfile	2	TRUE
rs72653948	G	A	G	A	0.24	-0.0107	0.169608	0.23	FALSE	FALSE	FALSE	j4dYB6	0.0229	0.6403	11615	outcome	TRUE	reported	textfile	RPS20	1.3e-25	0.0229416	exposure	TRUE	reported	nG2eib	textfile	2	TRUE
rs72700413	A	G	A	G	-0.24	-0.0347	0.064854	0.08	FALSE	FALSE	FALSE	j4dYB6	0.0351	0.3237	11615	outcome	TRUE	reported	textfile	RPS6	6.9e-16	0.0297314	exposure	TRUE	reported	nG2eib	textfile	2	TRUE
rs72896138	A	G	A	G	-0.41	-0.0516	0.01689	0.03	FALSE	FALSE	FALSE	j4dYB6	0.0651	0.4276	11019	outcome	TRUE	reported	textfile	RPS18	1.8e-07	0.0785608	exposure	TRUE	reported	nG2eib	textfile	2	TRUE
rs73040091	C	G	C	G	0.38	0.0752	0.063055	0.07	FALSE	TRUE	FALSE	j4dYB6	0.0402	0.06137	11615	outcome	TRUE	reported	textfile	RPS16	8.4e-16	0.0472154	exposure	TRUE	reported	nG2eib	textfile	2	TRUE
rs73058528	G	A	G	A	0.11	0.0137	0.169728	0.28	FALSE	FALSE	FALSE	j4dYB6	0.023	0.5528	11050	outcome	TRUE	reported	textfile	RPSA	3.6e-06	0.0237415	exposure	TRUE	reported	nG2eib	textfile	2	TRUE
rs73299466	T	G	T	G	-0.15	0.0288	0.040535	0.04	FALSE	FALSE	FALSE	j4dYB6	0.0558	0.6051	11432	outcome	TRUE	reported	textfile	RPS24	1.9e-05	0.0350768	exposure	TRUE	reported	nG2eib	textfile	2	TRUE
rs7484392	C	T	C	T	-0.44	-0.0395	0.048611	0.05	FALSE	FALSE	FALSE	j4dYB6	0.0743	0.5948	7923	outcome	TRUE	reported	textfile	RPS26	2.8e-06	0.0939173	exposure	TRUE	reported	nG2eib	textfile	2	TRUE
rs75143485	T	C	T	C	0.67	-0.1462	0.022397	0.02	FALSE	FALSE	FALSE	j4dYB6	0.0973	0.1328	7226	outcome	TRUE	reported	textfile	RPS26	1.5e-07	0.127557	exposure	TRUE	reported	nG2eib	textfile	2	TRUE
rs7616236	A	G	A	G	-0.14	-0.0297	0.115954	0.15	FALSE	FALSE	FALSE	j4dYB6	0.0276	0.2812	11615	outcome	TRUE	reported	textfile	RPSA	4e-06	0.0303597	exposure	TRUE	reported	nG2eib	textfile	2	TRUE
rs76591422	T	C	T	C	0.2	0.155	0.032543	0.04	FALSE	FALSE	FALSE	j4dYB6	0.0648	0.01678	10454	outcome	TRUE	reported	textfile	RPS21	1.5e-05	0.0462034	exposure	TRUE	reported	nG2eib	textfile	2	TRUE
rs76664897	T	C	T	C	0.22	-0.0038	0.04399	0.04	FALSE	FALSE	FALSE	j4dYB6	0.0558	0.9454	11615	outcome	TRUE	reported	textfile	RPSA	4.3e-05	0.05378	exposure	TRUE	reported	nG2eib	textfile	2	TRUE
rs76894712	A	T	A	T	0.12	-0.0092	0.117647	0.17	FALSE	TRUE	FALSE	j4dYB6	0.0258	0.7208	11615	outcome	TRUE	reported	textfile	RPS23	0.00013	0.0313606	exposure	TRUE	reported	nG2eib	textfile	2	TRUE
rs77113754	G	A	G	A	-0.15	0.0575	0.091902	0.04	FALSE	FALSE	FALSE	j4dYB6	0.0532	0.2793	11432	outcome	TRUE	reported	textfile	RPS3A	0.00016	0.039735	exposure	TRUE	reported	nG2eib	textfile	2	TRUE
rs77232016	G	T	G	T	-0.29	0.0063	0.022135	0.06	FALSE	FALSE	FALSE	j4dYB6	0.0588	0.9146	9336	outcome	TRUE	reported	textfile	RPS9	9.9e-09	0.0505893	exposure	TRUE	reported	nG2eib	textfile	2	TRUE
rs773126	A	T	A	T	0.26	0.0003	0.369721	0.41	FALSE	TRUE	FALSE	j4dYB6	0.0266	0.9921	10202	outcome	TRUE	reported	textfile	RPS26	9.4e-11	0.0401464	exposure	TRUE	reported	nG2eib	textfile	2	TRUE
rs77745910	T	C	T	C	-0.14	-0.0251	0.103382	0.15	FALSE	FALSE	FALSE	j4dYB6	0.0295	0.3946	11050	outcome	TRUE	reported	textfile	RPS23	2.6e-05	0.0332863	exposure	TRUE	reported	nG2eib	textfile	2	TRUE
rs78287148	T	C	T	C	0.51	-0.1497	0.009107	0.01	FALSE	FALSE	FALSE	j4dYB6	0.1156	0.1953	7023	outcome	TRUE	reported	textfile	RPS16	3.4e-07	0.100004	exposure	TRUE	reported	nG2eib	textfile	2	TRUE
rs79592126	A	G	A	G	-0.51	0.075	0.01517	0.01	FALSE	FALSE	FALSE	j4dYB6	0.091	0.4102	9843	outcome	TRUE	reported	textfile	RPS18	1.1e-08	0.089246	exposure	TRUE	reported	nG2eib	textfile	2	TRUE
rs9099	G	A	G	A	0.19	-0.0087	0.134385	0.13	FALSE	FALSE	FALSE	j4dYB6	0.0291	0.7664	11615	outcome	TRUE	reported	textfile	RPS23	2.1e-08	0.0339071	exposure	TRUE	reported	nG2eib	textfile	2	TRUE
rs9366856	G	A	G	A	-0.17	0.022	0.34609	0.78	FALSE	FALSE	FALSE	j4dYB6	0.0244	0.3682	11615	outcome	TRUE	reported	textfile	RPS10	2.5e-20	0.0184013	exposure	TRUE	reported	nG2eib	textfile	2	TRUE
rs9493451	G	C	G	C	-0.084	0.0258	0.365415	0.31	FALSE	TRUE	FALSE	j4dYB6	0.0207	0.213	11615	outcome	TRUE	reported	textfile	RPS12	2.3e-06	0.0177774	exposure	TRUE	reported	nG2eib	textfile	2	TRUE
rs975484	G	C	G	C	-0.1	-0.0633	0.346178	0.25	FALSE	TRUE	FALSE	j4dYB6	0.024	0.008296	11050	outcome	TRUE	reported	textfile	RPS11	7.1e-08	0.0185576	exposure	TRUE	reported	nG2eib	textfile	2	TRUE
rs9806482	C	T	C	T	0.062	0.0264	0.466061	0.52	FALSE	FALSE	FALSE	j4dYB6	0.0191	0.1679	11615	outcome	TRUE	reported	textfile	RPS17	1.9e-06	0.0130149	exposure	TRUE	reported	nG2eib	textfile	2	TRUE
rs9808287	A	G	A	G	-0.16	-0.0381	0.126277	0.13	FALSE	FALSE	FALSE	j4dYB6	0.0295	0.1961	11615	outcome	TRUE	reported	textfile	RPS7	1e-09	0.0261891	exposure	TRUE	reported	nG2eib	textfile	2	TRUE
rs9826296	A	G	A	G	-0.13	-0.014	0.165328	0.13	FALSE	FALSE	FALSE	j4dYB6	0.0284	0.6215	11615	outcome	TRUE	reported	textfile	RPSA	6.5e-05	0.0325498	exposure	TRUE	reported	nG2eib	textfile	2	TRUE
Muscle skeletal-Longevity 99p
SNP	effect_allele.exposure	other_allele.exposure	effect_allele.outcome	other_allele.outcome	beta.exposure	beta.outcome	eaf.exposure	eaf.outcome	remove	palindromic	ambiguous	id.outcome	se.outcome	pval.outcome	samplesize.outcome	outcome	mr_keep.outcome	pval_origin.outcome	data_source.outcome	gene.exposure	pval.exposure	se.exposure	exposure	mr_keep.exposure	pval_origin.exposure	id.exposure	data_source.exposure	action	mr_keep
rs10042896	A	G	A	G	0.14	-0.0054	0.47224	0.46	FALSE	FALSE	FALSE	LXuvd2	0.03	0.8559	4524	outcome	TRUE	reported	textfile	RPS23	5.8e-11	0.0213779	exposure	TRUE	reported	nG2eib	textfile	2	TRUE
rs10118605	C	T	C	T	-0.068	0.0214	0.495053	0.55	FALSE	FALSE	FALSE	LXuvd2	0.0334	0.5219	4154	outcome	TRUE	reported	textfile	RPS6	4.6e-05	0.0166868	exposure	TRUE	reported	nG2eib	textfile	2	TRUE
rs10123714	T	C	T	C	0.069	0.0581	0.448057	0.51	FALSE	FALSE	FALSE	LXuvd2	0.0305	0.05663	4524	outcome	TRUE	reported	textfile	RPS6	4.2e-05	0.0168449	exposure	TRUE	reported	nG2eib	textfile	2	TRUE
rs10408981	G	C	G	C	-0.11	-0.0523	0.442171	0.4	FALSE	TRUE	TRUE	LXuvd2	0.0367	0.1543	4154	outcome	TRUE	reported	textfile	RPS16	4.3e-05	0.02689	exposure	TRUE	reported	nG2eib	textfile	2	FALSE
rs10419111	C	T	C	T	-0.072	0.0103	0.479493	0.63	FALSE	FALSE	FALSE	LXuvd2	0.0315	0.7444	4524	outcome	TRUE	reported	textfile	RPS19	1.3e-05	0.0165134	exposure	TRUE	reported	nG2eib	textfile	2	TRUE
rs1057232	A	G	A	G	-0.24	0.0167	0.41518	0.55	FALSE	FALSE	FALSE	LXuvd2	0.0303	0.5814	4524	outcome	TRUE	reported	textfile	RPS28	2e-36	0.0190412	exposure	TRUE	reported	nG2eib	textfile	2	TRUE
rs10757059	C	A	C	A	0.07	-0.0423	0.485972	0.42	FALSE	FALSE	FALSE	LXuvd2	0.0328	0.1967	4524	outcome	TRUE	reported	textfile	RPS6	3.3e-05	0.0168605	exposure	TRUE	reported	nG2eib	textfile	2	TRUE
rs10876864	A	G	A	G	-0.95	-0.0196	0.495485	0.59	FALSE	FALSE	FALSE	LXuvd2	0.0303	0.5172	4524	outcome	TRUE	reported	textfile	RPS26	1e-200	0.0285372	exposure	TRUE	reported	nG2eib	textfile	2	TRUE
rs11099756	G	A	G	A	0.13	-0.0295	0.095489	0.07	FALSE	FALSE	FALSE	LXuvd2	0.0599	0.6223	4303	outcome	TRUE	reported	textfile	RPS3A	9.7e-05	0.0333506	exposure	TRUE	reported	nG2eib	textfile	2	TRUE
rs11171744	C	G	C	G	-0.32	-0.0466	0.092302	0.14	FALSE	TRUE	FALSE	LXuvd2	0.0562	0.4071	4000	outcome	TRUE	reported	textfile	RPS26	9.9e-07	0.0653913	exposure	TRUE	reported	nG2eib	textfile	2	TRUE
rs11171773	G	A	G	A	-0.48	0.0533	0.226101	0.92	FALSE	FALSE	FALSE	LXuvd2	0.0654	0.4152	4303	outcome	TRUE	reported	textfile	RPS26	6.7e-12	0.069931	exposure	TRUE	reported	nG2eib	textfile	2	TRUE
rs11217124	G	A	G	A	-0.21	-0.0564	0.29206	0.24	FALSE	FALSE	FALSE	LXuvd2	0.0353	0.1099	4524	outcome	TRUE	reported	textfile	RPS25	1.8e-33	0.0174185	exposure	TRUE	reported	nG2eib	textfile	2	TRUE
rs11217307	G	A	G	A	0.07	-0.0003	0.46418	0.58	FALSE	FALSE	FALSE	LXuvd2	0.0334	0.9924	4154	outcome	TRUE	reported	textfile	RPS25	7.3e-05	0.0176487	exposure	TRUE	reported	nG2eib	textfile	2	TRUE
rs112244905	T	G	T	G	-0.47	0.077	0.02317	0.03	FALSE	FALSE	FALSE	LXuvd2	0.1227	0.5304	3545	outcome	TRUE	reported	textfile	RPS26	0.00018	0.125482	exposure	TRUE	reported	nG2eib	textfile	2	TRUE
rs11236430	C	T	C	T	-0.093	0.0245	0.371396	0.61	FALSE	FALSE	FALSE	LXuvd2	0.0314	0.4354	4524	outcome	TRUE	reported	textfile	RPS3	1.2e-05	0.0212446	exposure	TRUE	reported	nG2eib	textfile	2	TRUE
rs112721139	G	A	G	A	-0.28	0.1333	0.015031	0.03	FALSE	FALSE	FALSE	LXuvd2	0.1283	0.2988	3322	outcome	TRUE	reported	textfile	RPSA	8e-05	0.0709867	exposure	TRUE	reported	nG2eib	textfile	2	TRUE
rs1129460	C	A	C	A	-0.15	-0.0197	0.098977	0.24	FALSE	FALSE	FALSE	LXuvd2	0.0706	0.7805	2457	outcome	TRUE	reported	textfile	RPS11	2.3e-08	0.0268443	exposure	TRUE	reported	nG2eib	textfile	2	TRUE
rs113636971	G	A	G	A	-0.28	0.0449	0.076913	0.07	FALSE	FALSE	FALSE	LXuvd2	0.0842	0.5938	3801	outcome	TRUE	reported	textfile	RPS3	6.2e-11	0.0428211	exposure	TRUE	reported	nG2eib	textfile	2	TRUE
rs113681805	A	T	A	T	0.13	-0.0211	0.1343	0.15	FALSE	TRUE	FALSE	LXuvd2	0.0438	0.63	4524	outcome	TRUE	reported	textfile	RPS20	1.3e-06	0.0268609	exposure	TRUE	reported	nG2eib	textfile	2	TRUE
rs113883332	C	T	C	T	-0.35	0.093	0.013833	0.02	FALSE	FALSE	FALSE	LXuvd2	0.1365	0.4957	3199	outcome	TRUE	reported	textfile	RPS16	9.6e-05	0.0897324	exposure	TRUE	reported	nG2eib	textfile	2	TRUE
rs114584454	G	T	G	T	-0.16	0.0574	0.192964	0.19	FALSE	FALSE	FALSE	LXuvd2	0.0396	0.147	4524	outcome	TRUE	reported	textfile	RPSA	4.8e-09	0.0273319	exposure	TRUE	reported	nG2eib	textfile	2	TRUE
rs11558965	T	G	T	G	-0.19	-0.0201	0.051874	0.07	FALSE	FALSE	FALSE	LXuvd2	0.0828	0.8078	3680	outcome	TRUE	reported	textfile	RPS7	4.8e-08	0.0348077	exposure	TRUE	reported	nG2eib	textfile	2	TRUE
rs11614512	T	C	T	C	0.3	0.0272	0.073322	0.12	FALSE	FALSE	FALSE	LXuvd2	0.0696	0.6959	3680	outcome	TRUE	reported	textfile	RPS26	5.1e-06	0.0657804	exposure	TRUE	reported	nG2eib	textfile	2	TRUE
rs116547500	C	G	C	G	-0.4	0.0523	0.01699	0.03	FALSE	TRUE	FALSE	LXuvd2	0.1116	0.6396	3692	outcome	TRUE	reported	textfile	RPSA	4.1e-12	0.0576893	exposure	TRUE	reported	nG2eib	textfile	2	TRUE
rs11671409	C	G	C	G	-0.3	-0.1261	0.026542	0.04	FALSE	TRUE	FALSE	LXuvd2	0.1032	0.2216	3680	outcome	TRUE	reported	textfile	RPS16	2.4e-05	0.0710227	exposure	TRUE	reported	nG2eib	textfile	2	TRUE
rs117396149	A	G	A	G	0.63	-0.0933	0.026158	0.03	FALSE	FALSE	FALSE	LXuvd2	0.1555	0.5484	2371	outcome	TRUE	reported	textfile	RPS26	3e-10	0.100019	exposure	TRUE	reported	nG2eib	textfile	2	TRUE
rs11750053	A	C	A	C	-0.11	0.0313	0.24042	0.31	FALSE	FALSE	FALSE	LXuvd2	0.0335	0.3504	4524	outcome	TRUE	reported	textfile	RPS23	1.9e-05	0.025723	exposure	TRUE	reported	nG2eib	textfile	2	TRUE
rs117506357	A	G	A	G	0.13	-0.0797	0.083795	0.09	FALSE	FALSE	FALSE	LXuvd2	0.0776	0.3049	3812	outcome	TRUE	reported	textfile	RPS15A	0.00011	0.0336143	exposure	TRUE	reported	nG2eib	textfile	2	TRUE
rs117833207	C	G	C	G	-0.18	0.1458	0.027157	0.06	FALSE	TRUE	FALSE	LXuvd2	0.1199	0.224	2506	outcome	TRUE	reported	textfile	RPS28	4e-05	0.0438225	exposure	TRUE	reported	nG2eib	textfile	2	TRUE
rs118067691	G	T	G	T	0.45	0.0497	0.026594	0.04	FALSE	FALSE	FALSE	LXuvd2	0.1021	0.6268	3677	outcome	TRUE	reported	textfile	RPS26	1.4e-05	0.103594	exposure	TRUE	reported	nG2eib	textfile	2	TRUE
rs12417071	A	G	A	G	-0.21	0.0474	0.041868	0.05	FALSE	FALSE	FALSE	LXuvd2	0.0747	0.5257	4050	outcome	TRUE	reported	textfile	RPS3	1.1e-05	0.0477651	exposure	TRUE	reported	nG2eib	textfile	2	TRUE
rs12527381	C	G	C	G	0.096	0.0658	0.249665	0.12	FALSE	TRUE	FALSE	LXuvd2	0.0469	0.1608	4524	outcome	TRUE	reported	textfile	RPS10	1.8e-05	0.0223862	exposure	TRUE	reported	nG2eib	textfile	2	TRUE
rs12609253	C	G	C	G	0.13	0.052	0.444834	0.37	FALSE	TRUE	TRUE	LXuvd2	0.0317	0.1003	4524	outcome	TRUE	reported	textfile	RPS16	4.5e-07	0.0257605	exposure	TRUE	reported	nG2eib	textfile	2	FALSE
rs12658240	T	C	T	C	0.13	-0.0417	0.199281	0.23	FALSE	FALSE	FALSE	LXuvd2	0.0359	0.2459	4524	outcome	TRUE	reported	textfile	RPS23	8.6e-07	0.0264161	exposure	TRUE	reported	nG2eib	textfile	2	TRUE
rs12662460	G	C	G	C	0.17	-0.0882	0.083737	0.03	FALSE	TRUE	FALSE	LXuvd2	0.1135	0.4369	3692	outcome	TRUE	reported	textfile	RPS10	9.7e-05	0.0436124	exposure	TRUE	reported	nG2eib	textfile	2	TRUE
rs13807	A	G	A	G	0.35	-0.1335	0.009903	0.01	FALSE	FALSE	FALSE	LXuvd2	0.1797	0.4577	3322	outcome	TRUE	reported	textfile	FAU	9.7e-06	0.0791183	exposure	TRUE	reported	nG2eib	textfile	2	TRUE
rs138077206	T	C	T	C	0.36	0.0062	0.021159	0.03	FALSE	FALSE	FALSE	LXuvd2	0.1106	0.9551	3692	outcome	TRUE	reported	textfile	RPS16	1.9e-06	0.0755703	exposure	TRUE	reported	nG2eib	textfile	2	TRUE
rs140116753	G	A	G	A	0.59	0.0942	0.038063	0.06	FALSE	FALSE	FALSE	LXuvd2	0.0871	0.2797	3680	outcome	TRUE	reported	textfile	RPS26	3e-13	0.080884	exposure	TRUE	reported	nG2eib	textfile	2	TRUE
rs141311291	G	A	G	A	0.2	-0.3558	0.015508	0.02	FALSE	FALSE	FALSE	LXuvd2	0.1599	0.02605	2790	outcome	TRUE	reported	textfile	RPS21	5.4e-05	0.0495343	exposure	TRUE	reported	nG2eib	textfile	2	TRUE
rs141600894	C	T	C	T	-0.18	0.0513	0.015412	0.02	FALSE	FALSE	FALSE	LXuvd2	0.1563	0.7427	2396	outcome	TRUE	reported	textfile	RPS17	0.00014	0.0472668	exposure	TRUE	reported	nG2eib	textfile	2	TRUE
rs142856921	A	G	A	G	0.37	-0.1281	0.011418	0.02	FALSE	FALSE	FALSE	LXuvd2	0.174	0.4617	2297	outcome	TRUE	reported	textfile	RPS20	1.2e-07	0.0698971	exposure	TRUE	reported	nG2eib	textfile	2	TRUE
rs143572577	A	G	A	G	0.56	-0.0755	0.010731	0.02	FALSE	FALSE	FALSE	LXuvd2	0.1785	0.6721	2902	outcome	TRUE	reported	textfile	RPS26	0.00013	0.146349	exposure	TRUE	reported	nG2eib	textfile	2	TRUE
rs144131441	C	G	C	G	-0.46	0.0085	0.049579	0.07	FALSE	TRUE	FALSE	LXuvd2	0.0687	0.901	4303	outcome	TRUE	reported	textfile	RPS26	5.8e-10	0.0742442	exposure	TRUE	reported	nG2eib	textfile	2	TRUE
rs145044106	C	G	C	G	-0.49	-0.0619	0.008986	0.03	FALSE	TRUE	FALSE	LXuvd2	0.1269	0.6259	3692	outcome	TRUE	reported	textfile	RPS18	5.2e-08	0.0900018	exposure	TRUE	reported	nG2eib	textfile	2	TRUE
rs147809373	C	T	C	T	-0.22	-0.1435	0.0381	0.02	FALSE	FALSE	FALSE	LXuvd2	0.1462	0.3263	2829	outcome	TRUE	reported	textfile	RPS2	2.6e-05	0.052307	exposure	TRUE	reported	nG2eib	textfile	2	TRUE
rs149326047	C	T	C	T	0.24	-0.0416	0.033103	0.03	FALSE	FALSE	FALSE	LXuvd2	0.1239	0.7369	3322	outcome	TRUE	reported	textfile	RPS16	0.0001	0.0616873	exposure	TRUE	reported	nG2eib	textfile	2	TRUE
rs149874092	C	G	C	G	0.2	-0.0084	0.127796	0.15	FALSE	TRUE	FALSE	LXuvd2	0.053	0.8747	4154	outcome	TRUE	reported	textfile	RPS26	0.00017	0.0531933	exposure	TRUE	reported	nG2eib	textfile	2	TRUE
rs150823486	A	G	A	G	-0.45	0.0734	0.045469	0.06	FALSE	FALSE	FALSE	LXuvd2	0.1047	0.4834	3457	outcome	TRUE	reported	textfile	RPS26	2.1e-07	0.0867008	exposure	TRUE	reported	nG2eib	textfile	2	TRUE
rs166252	C	T	C	T	-0.19	-0.0203	0.36199	0.65	FALSE	FALSE	FALSE	LXuvd2	0.0434	0.6406	4154	outcome	TRUE	reported	textfile	RPS9	1.2e-21	0.0198785	exposure	TRUE	reported	nG2eib	textfile	2	TRUE
rs16832210	G	A	G	A	-0.22	-0.0192	0.10612	0.12	FALSE	FALSE	FALSE	LXuvd2	0.0507	0.7051	4154	outcome	TRUE	reported	textfile	RPS8	6.8e-19	0.02478	exposure	TRUE	reported	nG2eib	textfile	2	TRUE
rs17135716	G	A	G	A	0.26	-0.0179	0.097711	0.12	FALSE	FALSE	FALSE	LXuvd2	0.0545	0.7421	3375	outcome	TRUE	reported	textfile	RPS2	2e-12	0.0369608	exposure	TRUE	reported	nG2eib	textfile	2	TRUE
rs173665	A	G	A	G	0.2	-0.031	0.107111	0.1	FALSE	FALSE	FALSE	LXuvd2	0.0555	0.5766	4524	outcome	TRUE	reported	textfile	RPS28	1.2e-09	0.0328934	exposure	TRUE	reported	nG2eib	textfile	2	TRUE
rs17555056	G	C	G	C	-0.3	-0.0231	0.204714	0.11	FALSE	TRUE	FALSE	LXuvd2	0.0497	0.6417	4524	outcome	TRUE	reported	textfile	RPS11	1.6e-40	0.0225097	exposure	TRUE	reported	nG2eib	textfile	2	TRUE
rs17793056	T	C	T	C	0.084	-0.0152	0.463702	0.52	FALSE	FALSE	FALSE	LXuvd2	0.0325	0.6412	4154	outcome	TRUE	reported	textfile	RPSA	0.00013	0.0219524	exposure	TRUE	reported	nG2eib	textfile	2	TRUE
rs183425427	A	C	A	C	0.81	-0.0713	0.011461	0.02	FALSE	FALSE	FALSE	LXuvd2	0.1691	0.6736	3322	outcome	TRUE	reported	textfile	RPS26	1.7e-05	0.188327	exposure	TRUE	reported	nG2eib	textfile	2	TRUE
rs1860236	C	A	C	A	-0.23	-0.0648	0.244209	0.15	FALSE	FALSE	FALSE	LXuvd2	0.0497	0.1927	4154	outcome	TRUE	reported	textfile	RPS2	1.7e-14	0.0299811	exposure	TRUE	reported	nG2eib	textfile	2	TRUE
rs1865960	T	C	T	C	-0.18	0.0427	0.09963	0.08	FALSE	FALSE	FALSE	LXuvd2	0.0611	0.4847	4370	outcome	TRUE	reported	textfile	RPS5	6.5e-09	0.0310165	exposure	TRUE	reported	nG2eib	textfile	2	TRUE
rs1963311	T	C	T	C	0.15	0.003	0.131303	0.14	FALSE	FALSE	FALSE	LXuvd2	0.0463	0.9485	4524	outcome	TRUE	reported	textfile	RPS23	2.1e-06	0.0316218	exposure	TRUE	reported	nG2eib	textfile	2	TRUE
rs2037276	A	G	A	G	-0.087	0.0102	0.292339	0.26	FALSE	FALSE	FALSE	LXuvd2	0.0342	0.765	4524	outcome	TRUE	reported	textfile	RPS27L	0.00014	0.0228456	exposure	TRUE	reported	nG2eib	textfile	2	TRUE
rs2056993	T	C	T	C	-0.16	0.0349	0.200342	0.05	FALSE	FALSE	FALSE	LXuvd2	0.0722	0.6292	4182	outcome	TRUE	reported	textfile	RPS2	4.6e-05	0.0392631	exposure	TRUE	reported	nG2eib	textfile	2	TRUE
rs2069398	A	G	A	G	0.48	-0.033	0.124896	0.07	FALSE	FALSE	FALSE	LXuvd2	0.0626	0.598	4370	outcome	TRUE	reported	textfile	RPS26	2.4e-12	0.0684832	exposure	TRUE	reported	nG2eib	textfile	2	TRUE
rs210157	T	C	T	C	-0.098	-0.0117	0.391636	0.35	FALSE	FALSE	FALSE	LXuvd2	0.0313	0.7094	4524	outcome	TRUE	reported	textfile	RPS18	6.2e-05	0.024469	exposure	TRUE	reported	nG2eib	textfile	2	TRUE
rs2236070	T	C	T	C	0.081	-0.041	0.165996	0.22	FALSE	FALSE	FALSE	LXuvd2	0.04	0.3063	4524	outcome	TRUE	reported	textfile	RPS21	5.1e-05	0.0199951	exposure	TRUE	reported	nG2eib	textfile	2	TRUE
rs2241787	C	T	C	T	-0.14	0.0097	0.445721	0.41	FALSE	FALSE	FALSE	LXuvd2	0.0318	0.7597	4524	outcome	TRUE	reported	textfile	RPS5	5.8e-16	0.0172979	exposure	TRUE	reported	nG2eib	textfile	2	TRUE
rs224912	T	C	T	C	0.14	-0.1002	0.152936	0.16	FALSE	FALSE	FALSE	LXuvd2	0.0418	0.01645	4524	outcome	TRUE	reported	textfile	RPS23	2.1e-06	0.0295137	exposure	TRUE	reported	nG2eib	textfile	2	TRUE
rs2286466	G	A	G	A	-0.18	-0.0554	0.126148	0.8	FALSE	FALSE	FALSE	LXuvd2	0.0477	0.245	2750	outcome	TRUE	reported	textfile	RPS2	2.2e-10	0.0283613	exposure	TRUE	reported	nG2eib	textfile	2	TRUE
rs2304216	T	C	T	C	-0.26	-0.0053	0.056741	0.08	FALSE	FALSE	FALSE	LXuvd2	0.0653	0.9358	4249	outcome	TRUE	reported	textfile	RPS16	3e-07	0.0507471	exposure	TRUE	reported	nG2eib	textfile	2	TRUE
rs2304222	G	A	G	A	0.29	0.0704	0.039552	0.05	FALSE	FALSE	FALSE	LXuvd2	0.0769	0.3601	4050	outcome	TRUE	reported	textfile	RPS16	3.9e-06	0.0628162	exposure	TRUE	reported	nG2eib	textfile	2	TRUE
rs2304523	T	G	T	G	0.3	-0.0793	0.28129	0.15	FALSE	FALSE	FALSE	LXuvd2	0.0426	0.06268	4524	outcome	TRUE	reported	textfile	RPS9	9e-40	0.0227306	exposure	TRUE	reported	nG2eib	textfile	2	TRUE
rs251906	G	C	G	C	0.18	-0.0336	0.237832	0.1	FALSE	TRUE	FALSE	LXuvd2	0.0543	0.5363	4370	outcome	TRUE	reported	textfile	RPS16	4.4e-05	0.0440593	exposure	TRUE	reported	nG2eib	textfile	2	TRUE
rs2770995	G	C	G	C	-0.19	0.0111	0.151982	0.04	FALSE	TRUE	FALSE	LXuvd2	0.0991	0.9108	3680	outcome	TRUE	reported	textfile	RACK1	8.9e-07	0.0386609	exposure	TRUE	reported	nG2eib	textfile	2	TRUE
rs2771000	A	C	A	C	-0.16	-0.0379	0.150443	0.16	FALSE	FALSE	FALSE	LXuvd2	0.0449	0.3984	4154	outcome	TRUE	reported	textfile	RACK1	4.3e-11	0.0242669	exposure	TRUE	reported	nG2eib	textfile	2	TRUE
rs28394803	C	A	C	A	-0.19	0.0551	0.16185	0.1	FALSE	FALSE	FALSE	LXuvd2	0.0509	0.2792	4524	outcome	TRUE	reported	textfile	RPS27L	5.2e-10	0.0305813	exposure	TRUE	reported	nG2eib	textfile	2	TRUE
rs28582623	G	A	G	A	0.068	-0.0151	0.20097	0.21	FALSE	FALSE	FALSE	LXuvd2	0.0377	0.6881	4524	outcome	TRUE	reported	textfile	RPS17	2.1e-05	0.015985	exposure	TRUE	reported	nG2eib	textfile	2	TRUE
rs28771971	C	T	C	T	-0.086	0.0111	0.367523	0.27	FALSE	FALSE	FALSE	LXuvd2	0.042	0.7914	4154	outcome	TRUE	reported	textfile	RPS28	8.8e-05	0.0219304	exposure	TRUE	reported	nG2eib	textfile	2	TRUE
rs3133186	C	T	C	T	-0.53	0.0676	0.071802	0.07	FALSE	FALSE	FALSE	LXuvd2	0.0613	0.2705	4303	outcome	TRUE	reported	textfile	RPS3	9.8e-45	0.0377683	exposure	TRUE	reported	nG2eib	textfile	2	TRUE
rs34350479	A	G	A	G	0.31	-0.006	0.074359	0.05	FALSE	FALSE	FALSE	LXuvd2	0.0692	0.9314	4182	outcome	TRUE	reported	textfile	RPS16	2e-10	0.0487319	exposure	TRUE	reported	nG2eib	textfile	2	TRUE
rs34940771	A	G	A	G	-0.099	-0.0717	0.112237	0.15	FALSE	FALSE	FALSE	LXuvd2	0.0425	0.0917	4524	outcome	TRUE	reported	textfile	RPS17	5.8e-07	0.0198089	exposure	TRUE	reported	nG2eib	textfile	2	TRUE
rs3738	C	A	C	A	-0.39	-0.0055	0.32623	0.32	FALSE	FALSE	FALSE	LXuvd2	0.0321	0.8642	4524	outcome	TRUE	reported	textfile	RPS23	6.3e-72	0.0217453	exposure	TRUE	reported	nG2eib	textfile	2	TRUE
rs3740253	T	C	T	C	0.093	-0.0385	0.476134	0.6	FALSE	FALSE	FALSE	LXuvd2	0.0313	0.2178	4524	outcome	TRUE	reported	textfile	RPS24	8.3e-09	0.0161395	exposure	TRUE	reported	nG2eib	textfile	2	TRUE
[truncated: 56 more rows]
