# Supplementary material for: Mendelian randomization analyses implicate biogenesis of translation machinery in human aging
Source: Genome Res. 2022 Feb;32(2):258–65. doi: 10.1101/gr.275636.121 (PMC8805714; doi:10.1101/gr.275636.121)
Supplement: Supplemental Material [file supp_gr.275636.121_Supplemental_Table_S6.xlsx]

## Sheet: Sheet1
Diseases	GWAS ID in Open GWAS project	Consortium	Year	PMID	Reference	Article	No. Cases	No. Controls	Sample size	Number of SNPs	Population	Sex	Unit	Build
Alzheimer's disease	ieu-a-297	IGAP	2013	24162737	Lambert	Meta-analysis of 74,046 individuals identifies 11 new susceptibility loci for Alzheimer's disease	17008	37154	54162	7055882	European	Males and Females	log odds	HG19/GRCh37
Amyotrophic lateral sclerosis	ieu-a-1085	Project MinE	2016	27455348	van Rheenen	Genome-wide association analyses identify new risk variants and the genetic architecture of amyotrophic lateral sclerosis	12577	23475	36052	7740345	European	Males and Females	log odds	HG19/GRCh37
Breast cancer	ieu-a-1126	BCAC	2017	29059683	Michailidou K	Association analysis identifies 65 new breast cancer risk loci	122977	105974	228951	10680257	European	Females	log odds	HG19/GRCh37
Coronary heart disease	ieu-a-7	CARDIoGRAMplusC4D	2015	26343387	Nikpay	A comprehensive 1000 Genomes–based genome-wide association meta-analysis of coronary artery disease	60801	123504	184305	9455779	Mixed	Males and Females	log odds	HG19/GRCh37
Heart attack/Myocardial infarction, self-reported	ukb-b-15829	MRC-IEU	2018	NA	Ben Elsworth	NA	10616	452317	462933	9851867	European	Males and Females	SD	HG19/GRCh37
Ischemic stroke	ieu-a-1108	ISGC	2016	26935894	Malik	Low-frequency and common genetic variation in ischemic stroke;The METASTROKE collaboration	10307	19326	29633	2421920	Mixed	Males and Females	-	HG19/GRCh37
Lung cancer	ieu-a-966	ILCCO	2014	24880342	Wang Y	Rare variants of large effect in BRCA2 and CHEK2 affect risk of lung cancer	11348	15861	27209	8945893	European	Males and Females	log odds	HG19/GRCh37
Osteoarthritis, self-reported	ukb-b-14486	MRC-IEU	2018	NA	Ben Elsworth	NA	38472	424461	462933	9851867	European	Males and Females	SD	HG19/GRCh37
Ovarian cancer	ieu-a-1120	OCAC	2017	28346442	Phelan	Identification of 12 new susceptibility loci for different histotypes of epithelial ovarian cancer	25509	40941	66450	-	European	Females	log odds	HG19/GRCh37
Type 2 diabetes	ieu-a-23	DIAGRAM	2014	24509480	Mahajan A	Genome-wide trans-ancestry meta-analysis provides insight into the genetic architecture of type 2 diabetes susceptibility	26488	83964	110452	2915012	Mixed	Males and Females	log odds	HG19/GRCh37
Developmental and anthropometric	GWAS ID in Open GWAS project	Consortium	Year	PMID	Reference	Article	No. Cases	No. Controls	Sample size	Number of SNPs	Population	Sex	Unit	Build
Age when periods started (menarche)	ukb-b-3768	MRC-IEU	2018	NA	Ben Elsworth	NA	NA	NA	243944	9851867	European	Males and Females	SD	HG19/GRCh37
Birth weight	ukb-a-198	Neale Lab	2017	NA	Neale	NA	NA	NA	193063	10894596	European	Males and Females	SD	HG19/GRCh37
Body fat percentage	ukb-b-8909	MRC-IEU	2018	NA	Ben Elsworth	NA	NA	NA	454633	9851867	European	Males and Females	SD	HG19/GRCh37
Childhood obesity	ieu-a-1096	EGG	2012	22484627	Bradfield JP	A genome-wide association meta-analysis identifies new childhood obesity loci	5530	8318	13848	2442739	European	Males and Females	log odds	HG19/GRCh37
Difference in height between adolescence and adulthood	ieu-a-1040	EGG	2013	23449627	Cousminer	Genome-wide association and longitudinal analyses reveal genetic loci linking pubertal height growth, pubertal timing and childhood adiposity	NA	NA	9228	2401290	European	Males and Females	SD	HG19/GRCh37
Difference in height between childhood and adulthood	ieu-a-1037	EGG	2013	23449627	Cousminer	Genome-wide association and longitudinal analyses reveal genetic loci linking pubertal height growth, pubertal timing and childhood adiposity	NA	NA	10799	2384832	European	Males and Females	SD	HG19/GRCh37
Height	ieu-a-89	GIANT	2014	25282103	Wood AR	Defining the role of common variation in the genomic and biological architecture of adult human height	NA	NA	253288	2550859	European	Males and Females	SD	HG19/GRCh37
Obesity class 1	ieu-a-90	GIANT	2013	23563607	Berndt SI	Genome-wide meta-analysis identifies 11 new loci for anthropometric traits and provides insights into genetic architecture / I am not sure about the article	32858	65839	98697	2380428	European	Males and Females	log odds	HG19/GRCh37
Whole body fat mass	ukb-b-19393	MRC-IEU	2018	NA	Ben Elsworth	NA	NA	NA	454137	9851867	European	Males and Females	SD	HG19/GRCh37
Whole body fat-free mass	ukb-b-13354	MRC-IEU	2018	NA	Ben Elsworth	NA	NA	NA	454850	9851867	European	Males and Females	SD	HG19/GRCh37
Other	GWAS ID in Open GWAS project	Consortium	Year	PMID	Reference	Article	No. Cases	No. Controls	Sample size	Number of SNPs	Population	Sex	Unit	Build
Current tobacco smoking	ukb-b-223	MRC-IEU	2018	NA	Ben Elsworth	NA	NA	NA	462434	9851867	European	Males and Females	SD	HG19/GRCh37
The list of GWAS studies used (in adition to the longevity GWAS)
